# Supplementary material for: Transcriptome and metabolome analyses of lignin biosynthesis mechanism of Platycladus orientalis
Source: PeerJ. 2022 Nov 2;10:e14172. doi: 10.7717/peerj.14172 (PMC9636869; doi:10.7717/peerj.14172)
Supplement: Table S1 [file peerj-10-14172-s006.xlsx]

## Sheet: Sheet1
Table S1 All qRT-PCR primer sequences
Annotation name	Primer sequences	Tm (℃)
Cluster-44281.111830	TTTGCAGGCGTTGTAATGGC	55
	AAGCAAATGTGTGGGCACTG	55
Cluster-44281.38217	CTTGCATGAAGCGCCATCTC	55
	GCGAAGAGTGGACAAGTGGA	55
Cluster-44281.38219	CACCTCTCCTGCAACTTCGT	55
	TCGTTGTGGACCGTCTCAAG	55
Cluster-44281.66535	CTTGCATGAAGCGCCATCTC	55
	GCGAAGAGTGGACAAGTGGA	55
Cluster-68156.0	CATGAGGCTTCTGGCTTCCA	55
	GCCCAGCAACTTAGAGAGGG	55
Cluster-44281.67555	ACCTACCACCCCTTGTTCCT	55
	CTTGGCTGTTTCTCCCCTGT	55
Cluster-44281.103971	TGATTTTGTGACGAGCCCGA	55
	ACGGTGCAATCTCGTCCATT	55
Cluster-44281.95346	CAGCAAGGCGTCCAGAGTAT	55
	TGCAAGGAGTTCCCCCAATC	55
Cluster-44281.68469	GTCTTCACCCATGCTGCTCT	55
	GCGGTCATCTTTCTGGTGGA	55
Cluster-59398.0	ATAGCACCATCCTTGCCACC	55
	GTCCTTCCAACCACCAACCA	55
Cluster-44281.47921	AGGAAGCAATGACGAGGACG	55
	CGACGACACATTTGGACACG	55
Cluster-44281.91549	CGTTAAATGCGAGCCTGAGC	55
	GACCGATTGTGTGACCACCT	55
Cluster-77994.4	GCACCAGCGGACAAGTTAGA	55
	ACAGAAGGCGAAGGTTTAGCA	55
Cluster-68496.0	ATTGTGGGTGCCTATGCGAA	55
	TGAACTCCAACGAAGGGCAA	55
Cluster-44281.111418	GCACCGAAGAACAGACCAGA	55
	ACAGCAGCAGAGCAAGACAA	55
Cluster-44281.83773	GGAGAAAGGAGGTGAGCGTC	55
	CCCGTATGTGTCCGTTCCTT	55
Cluster-44281.111976	TGGCACAGATGTTCCCACAA	55
	TCCCTCAGCTTTTGGTTGCT	55
Cluster-44281.69804	GCAAAAACGGTGGCTGAGAA	55
	CACAGTGGGCTGAAGGAGAG	55
Cluster-44281.131493	AGTCTTGTCCGAGTGTGGAG	55
	ATAGTGGCCGGAGCTGAAAC	55
Cluster-44281.131789	GGGATGCAGCTGACAACAAA	55
	TCTGGCTGCAATGGCAAGAA	55
		55
		55
