# Supplementary material for: Transcriptome and metabolome analyses of lignin biosynthesis mechanism of Platycladus orientalis
Source: PeerJ. 2022 Nov 2;10:e14172. doi: 10.7717/peerj.14172 (PMC9636869; doi:10.7717/peerj.14172)
Supplement: Table S2 [file peerj-10-14172-s007.xlsx]

## Sheet: Sheet1
Table S2 The lignin content of different tissues of P. orientails
Root	1	2	3	Mean	SD
JUN-1	31.3734	33.2202	32.8561	32.4833	0.978227
JUN-15	26.9034	28.702	28.3554	27.9869	0.954208
JUL-1	17.8757	17.8493	19.0425	18.2558	0.681408
JUL-15	26.7455	27.9518	28.3072	27.6682	0.818561
AUG-1	24.1091	26.0305	26.4911	25.5436	1.26343
AUG-15	24.4688	26.1445	26.8201	25.8111	1.21056
SEP-1	22.4861	23.8415	24.2714	23.533	0.931817
QCT-1	22.1527	23.5564	24.7715	23.4935	1.31055
NOV-1	19.1083	20.2883	20.8586	20.0851	0.892666
Stem	1	2	3	Mean	SD
JUN-1	29.7021	30.7067	30.6409	30.3499	0.561944
JUN-15	25.0128	28.3466	28.816	27.3918	2.07363
JUL-1	23.71	23.82	24.71	24.08	0.548361
JUL-15	25.4821	26.9561	27.9167	26.785	1.22628
AUG-1	23.1002	24.2846	25.2058	24.1969	1.05554
AUG-15	24.6531	25.8331	26.5218	25.6693	0.945063
SEP-1	18.1213	19.2926	19.2662	18.8934	0.668747
QCT-1	21.1525	22.2492	22.0079	21.8032	0.576281
NOV-1	18.81	19.7926	20.0032	19.5353	0.636858
Leaf	1	2	3	Mean	SD
JUN-1	23.881	25.3374	26.8859	25.3681	1.50267
JUN-15	19.6961	21.0911	21.2359	20.6744	0.850256
JUL-1	17.5423	18.7793	19.3847	18.5688	0.939075
JUL-15	23.6047	24.9908	26.1182	24.9046	1.259
AUG-1	19.547	21.2095	21.4157	20.7241	1.02459
AUG-15	18.7749	20.7095	21.0297	20.1714	1.21989
SEP-1	17.9459	18.2617	19.3671	18.5249	0.746301
QCT-1	17.301	18.9416	18.7881	18.3436	0.906145
NOV-1	15.8534	15.7394	16.722	16.1049	0.537422
