# Supplementary material for: Transcriptome and metabolome analyses of lignin biosynthesis mechanism of Platycladus orientalis
Source: PeerJ. 2022 Nov 2;10:e14172. doi: 10.7717/peerj.14172 (PMC9636869; doi:10.7717/peerj.14172)
Supplement: Table S4 [file peerj-10-14172-s009.xlsx]

## Sheet: Sheet1
Table S4 The list of secondary metabonomics data
Index	Formula	Compounds	Class I	Class II	CAS	Level	RM-1_vs_RM-2	RM-1_vs_RM-3	RM-2_vs_RM-3	RM1-1	RM1-2	RM1-3	RM2-1	RM2-2	RM2-3	RM3-1	RM3-2	RM3-3	cpd_ID	kegg_map
mws0628	C7H6O2	4-Hydroxybenzaldehyde	Phenolic acids	Phenolic acids	123-08-0	A	TRUE	FALSE	FALSE	1697600	1421100	1296700	633480	590200	666620	894530	824040	758270	C00633	ko00363,ko00623,ko00627,ko01061,ko01100,ko01120
pme2268	C7H7NO2	Trigonelline	Alkaloids	Alkaloids	535-83-1	B	TRUE	FALSE	TRUE	12434	16506	14708	4438.7	8308.8	5970	22342	18760	17528	C01004	ko00760
mws1336	C7H7NO2	4-Aminobenzoic acid	Phenolic acids	Phenolic acids	150-13-0	B	TRUE	TRUE	FALSE	41707	46150	40940	17429	19407	15594	6132.4	9378.6	6893.3	C00568	ko00627,ko00790,ko01061,ko01100,ko01120
Lmgn001670	C7H6O3	Salicylic acid	Phenolic acids	Phenolic acids	69-72-7	A	TRUE	FALSE	FALSE	349160	334130	332360	161600	123040	104680	229600	218700	198850	C00805	ko00360,ko00621,ko00624,ko00626,ko01053,ko01061,ko01070,ko01100,ko01110,ko01120,ko01220,ko04075,ko04976
pme1137	C6H5NO3	6-Hydroxynicotinic acid	Alkaloids	Alkaloids	5006-66-6	B	FALSE	FALSE	TRUE	7426.2	7278.2	8414.5	9751.9	9346.7	9260.3	3115.2	3177.9	3733.6	C01020	ko00760,ko01100,ko01120
mws2213	C9H8O2	Cinnamic acid	Phenolic acids	Phenolic acids	140-10-3	A	TRUE	FALSE	FALSE	10522	10491	10161	27664	28049	30642	11717	11411	11289	C00423	ko00130,ko00360,ko00940,ko00998,ko01060,ko01070,ko01100,ko01110,ko01120,ko01220
mws1024	C9H8O2	p-Coumaraldehyde	Phenolic acids	Phenolic acids	2538-87-6	B	TRUE	FALSE	FALSE	154710	125500	101210	53079	41076	49547	92239	83209	96494	C05608	ko00940,ko01061,ko01100,ko01110
mws0921	C9H10O2	p-Coumaryl alcohol	Phenolic acids	Phenolic acids	3690-05-9	B	TRUE	FALSE	FALSE	3056700	2389400	2176700	808180	674710	688740	1022500	862780	803850	C02646	ko00940,ko01061,ko01100,ko01110
mws0458	C8H8O3	Vanillin	Phenolic acids	Phenolic acids	121-33-5	A	TRUE	FALSE	FALSE	12774000	10799000	9253100	6997900	4031500	3904500	11173000	9205800	6411200	C00755	ko00627,ko00998,ko01061,ko01063,ko01100,ko01110,ko01120
mws1417	C9H7NO2	Indole-3-carboxylic acid	Alkaloids	Plumerane	771-50-6	B	TRUE	TRUE	FALSE	96040	105900	121610	1632800	1779000	1731400	2232000	2161500	2260700	--	--
pmb2795	C10H10O3	4-Methoxycinnamic acid	Phenolic acids	Phenolic acids	830-09-1	B	FALSE	FALSE	TRUE	18170	19608	23740	24064	47188	47638	5822.2	9484.3	17020	--	--
mws0009	C10H10O3	Coniferaldehyde	Phenolic acids	Phenolic acids	20649-42-7	A	TRUE	FALSE	FALSE	246180	190380	200960	120630	86828	107430	158100	148890	106160	C02666	ko00940,ko01061,ko01100,ko01110
mws1200	C10H10O3	Trans-4-Hydroxycinnamic Acid Methyl Ester	Phenolic acids	Phenolic acids	19367-38-5	A	TRUE	FALSE	TRUE	24369	31191	37582	42009	77321	74475	9906.9	15451	24959	--	--
mws2212	C9H8O4	Caffeic acid	Phenolic acids	Phenolic acids	331-39-5	B	TRUE	TRUE	TRUE	468110	489970	545670	234120	214970	236600	70839	74010	70039	C01197	ko00940,ko01061,ko01100,ko01110,ko01220
mws0093	C10H12O3	Coniferyl alcohol	Phenolic acids	Phenolic acids	458-35-5	A	TRUE	FALSE	FALSE	2827900	2505200	2214300	1366600	866710	859570	1150300	793500	512660	C00590	ko00940,ko00998,ko01061,ko01100,ko01110
Hmmp001310	C11H9NO2	3-Indoleacrylic acid	Alkaloids	Alkaloids	1204-06-4	A	TRUE	TRUE	TRUE	2165400	2392600	2640000	803050	809780	778970	268440	280180	296060	--	--
Lmdn003756	C10H10O4	Methyl caffeate	Phenolic acids	Phenolic acids	3843-74-1	A	FALSE	TRUE	TRUE	72937	83023	99189	84972	84750	82209	15525	17645	23635	C10477	--
Wmhn003572	C9H10O5	Ethyl gallate	Phenolic acids	Phenolic acids	831-61-8	A	TRUE	FALSE	FALSE	61849	51361	60576	34855	12502	13307	35572	17711	17393	--	--
pmb0818	C11H11NO3	Methoxyindoleacetic acid	Alkaloids	Plumerane	3471-31-6	B	TRUE	TRUE	TRUE	74280	80089	87357	25764	29576	28665	8759.1	11894	8526.9	C05660	ko00380
pme3443	C11H12O4	Sinapinaldehyde	Phenolic acids	Phenolic acids	4206-58-0	B	FALSE	TRUE	FALSE	10905	9357.5	9266.5	19877	15372	19325	50526	44244	32538	C05610	ko00940,ko01061,ko01100,ko01110
mws0914	C15H12O5	Pinobanksin*	Flavonoids	Dihydroflavonol	548-82-3	B	TRUE	TRUE	FALSE	22559	24771	31350	13252	13359	11635	4183.4	8209.6	5615.1	C09826	ko00941
pme0376	C15H12O5	Naringenin*	Flavonoids	Dihydroflavone	480-41-1	B	FALSE	TRUE	TRUE	17091	24771	27387	12945	12241	11996	9	9	9	C00509	ko00941,ko00943,ko01061,ko01100,ko01110
pme1201	C15H14O5	Phloretin	Flavonoids	Chalcones	60-82-2	B	TRUE	FALSE	FALSE	28783	37119	42693	101460	106960	90132	59303	70596	76484	C00774	ko00941,ko01110
mws1422	C15H14O5	Epiafzelechin	Flavonoids	Flavanols	24808-04-6	B	TRUE	TRUE	TRUE	9	9	9	6941.2	15523	8576.8	25647	32575	31052	C12128	ko00941,ko01110
mws4160	C16H12O5	8-Methoxychrysin(Wogonin)*	Flavonoids	Flavonoid	632-85-9	B	TRUE	FALSE	FALSE	19356	20858	22427	8910	8792.3	7893.8	6118.8	6931.1	7675.7	--	--
mws0918	C16H12O5	Prunetin	Flavonoids	Isoflavones	552-59-0	B	TRUE	TRUE	FALSE	176040	210160	229580	21451	22619	20115	23537	28516	27140	C10521	ko00943
mws0129	C16H12O5	Genkwanin*	Flavonoids	Flavonoid	437-64-9	B	TRUE	TRUE	FALSE	19267	18381	21941	5385.8	4738.5	6372.4	4126.3	4473.7	4985.3	C10046	--
pme1662	C16H14O5	Sakuranetin*	Flavonoids	Flavonoid	2957-21-3	B	TRUE	TRUE	FALSE	13901	49871	12756	2275.6	9	9	3955.7	7635.7	9	C09833	ko00941,ko01110
Cmsp008121	C16H14O5	7-O-methylnaringenin*	Flavonoids	Flavonoid	-	B	TRUE	TRUE	FALSE	13799	55817	14755	9	9	9	9	9	9	--	--
mws0064	C15H12O6	Eriodictyol*	Flavonoids	Dihydroflavone	552-58-9	A	FALSE	FALSE	TRUE	24472	30878	36460	32368	29393	36292	7888.5	8201.2	10145	C05631	ko00941,ko01100,ko01110
mws1000	C15H12O6	Fustin	Flavonoids	Dihydroflavonol	20725-03-5	A	TRUE	TRUE	FALSE	240200	259930	256790	1410200	1451400	1381500	3658200	3693800	3188000	C01378	ko00941
pme0460	C15H14O6	Epicatechin	Flavonoids	Flavanols	490-46-0	A	TRUE	TRUE	FALSE	1415400	1280100	1277300	8970200	10003000	7635800	21245000	21753000	25379000	C09727	ko00941,ko01061,ko01100,ko01110
mws0920	C15H10O7	Tricetin	Flavonoids	Flavonoid	520-31-0	B	FALSE	TRUE	TRUE	99772	107570	119730	146760	159370	142910	27230	18649	34537	C10192	ko00941
pmf0392	C17H16O6	Persicogenin (5,3'-dihydroxy-7,4'-dimethoxyflavanone)	Flavonoids	Dihydroflavone	28590-40-1	B	FALSE	TRUE	TRUE	38486	37238	44925	51527	54643	50350	229000	232920	218920	--	--
Cmcp007153	C20H28O3	lambertianic acid	Terpenoids	Ditepenoids	-	A	FALSE	TRUE	TRUE	1057700	1084900	1125200	1466200	1583400	1460900	6189200	6761600	6176400	--	--
pme3459	C20H28O3	Caffeyl alcohol	Phenolic acids	Phenolic acids	469-83-0	B	FALSE	TRUE	TRUE	54213	49017	63539	69048	67623	59674	9	9	9	C09066	--
Cmcn008547	C20H30O3	7α-hydroxysandaracopimaric acid	Terpenoids	Ditepenoids	-	A	TRUE	FALSE	FALSE	13711	13229	15986	4777.8	5138.4	5269	7133.9	7219.2	6259.7	--	--
pmn001514	C14H10O9	Digallic Acid	Phenolic acids	Phenolic acids	536-08-3	B	TRUE	FALSE	FALSE	47465	73171	67960	150480	167490	175820	188360	212530	197290	C01572	--
Cmcn011220	C20H34O3	imbricatolic acid	Terpenoids	Ditepenoids	6832-60-6	A	TRUE	TRUE	TRUE	37063	34266	32264	106970	107590	98618	305650	327710	329220	--	--
Lmzp004885	C17H14O7	Tricin	Flavonoids	Flavonoid	520-32-1	A	TRUE	FALSE	FALSE	20939	25287	35236	53219	63176	50099	18161	21097	31743	C10193	--
Lmsp011053	C18H18O6	7-Hydroxy-2',5,8-Trimethoxyflavanone	Flavonoids	Dihydroflavone	-	B	TRUE	TRUE	FALSE	4470.7	5491.1	6263.4	22082	23603	19691	32282	39704	36659	--	--
pmn001518	C13H16O10	1-O-Galloyl-β-D-glucose	Phenolic acids	Phenolic acids	58511-73-2	B	TRUE	TRUE	TRUE	1083600	1125600	1128100	478310	453630	447840	159310	169630	160150	--	--
pmb3068	C16H18O8	1-O-p-Coumaroyl quinic acid	Phenolic acids	Phenolic acids	-	A	FALSE	TRUE	TRUE	2149500	2418000	2309100	1250000	1074800	1185900	323420	357840	345100	--	--
Lmbn001162	C15H16O9	esculetin-glucoside*	Lignans and Coumarins	Coumarins	-	B	FALSE	TRUE	FALSE	197030	206620	169100	117360	146810	127050	38675	59108	48291	--	--
mws0906	C16H22O8	Coniferin	Phenolic acids	Phenolic acids	531-29-3	B	FALSE	FALSE	TRUE	703970	700440	660620	986450	974380	998670	223400	209130	206540	C00761	ko00940
mws0178	C16H18O9	Chlorogenic acid*	Phenolic acids	Phenolic acids	327-97-9	B	FALSE	TRUE	TRUE	250170	308070	290240	201690	159470	176990	53554	44135	63399	C00852	ko00940,ko00941,ko00945,ko01110
Zmhn002422	C16H20O9	Feruloyl glucose	Phenolic acids	Phenolic acids	-	B	TRUE	TRUE	FALSE	2167600	2397800	2552800	919810	941080	914600	394480	415650	399690	C17759	--
Hmlp003129	C20H22O6	Matairesinol	Lignans and Coumarins	Lignans	580-72-3	A	TRUE	FALSE	TRUE	1250500	1634500	1666000	3379000	3052200	2914400	950240	1023400	1075700	C10682	ko00998,ko01061,ko01110
pmb0752	C17H20O9	3-O-Feruloyl quinic acid	Phenolic acids	Phenolic acids	1899-29-2	B	FALSE	TRUE	FALSE	591990	535430	553610	373570	352250	293520	112750	123350	143870	C02572	--
mws0179	C17H20O9	Chlorogenic acid methyl ester	Phenolic acids	Phenolic acids	29708-87-0	B	FALSE	TRUE	TRUE	53801	67768	57784	46872	34170	39512	10372	14674	9887.5	--	--
pmp000465	C19H30O7	Byzantionoside A	Others	Others	189109-41-9	B	FALSE	TRUE	TRUE	93821	111880	160160	72980	60099	59277	15553	17843	32439	--	--
pmn001502	C21H24O7	Medioresinol	Lignans and Coumarins	Lignans	40957-99-1	B	TRUE	TRUE	FALSE	11851	11638	10696	48955	46143	43563	67444	60862	59781	--	--
HJN100	C20H22O8	Piceid	Phenolic acids	Phenolic acids	65914-17-2	B	TRUE	TRUE	TRUE	256540	266250	278090	133490	131620	104300	25894	45913	36201	--	--
pmn001738	C17H24O11	Oleoside 11-methyl ester	Phenolic acids	Phenolic acids	60539-23-3	B	FALSE	TRUE	TRUE	68296	74492	64605	58607	77832	94749	14008	7819.5	14078	--	--
mws0071	C21H20O9	Apigenin 4-O-rhamnoside*	Flavonoids	Flavonoid	133538-77-9	B	TRUE	TRUE	TRUE	7864.3	11110	14576	6122.5	5335.9	5017.1	9	9	9	--	--
Lmbp003668	C20H18O10	Kaempferol-3-arabinopyranoside	Flavonoids	Flavonoid	-	A	FALSE	TRUE	TRUE	990280	1118000	1439500	598070	791000	542140	51219	136300	90704	--	--
pmn001637	C20H18O10	Juglanin	Flavonoids	Flavonols	5041-67-8	B	FALSE	TRUE	TRUE	859330	1059400	1156800	654810	742330	746870	90611	108450	128160	--	--
pmn001663	C22H26O8	Syringaresinol	Lignans and Coumarins	Lignans	21453-69-0	A	TRUE	TRUE	FALSE	4598.9	2617.5	3789.2	42948	38284	34665	101020	84272	76710	C10889	--
mws0919	C21H20O10	Kaempferol-3-O-rhamnoside (Afzelin)(Kaempferin)	Flavonoids	Flavonols	482-39-3	A	TRUE	FALSE	FALSE	2459200	2669600	3136000	1062300	1443000	1219800	705520	756970	853280	C16911	ko00944
Xmyp006011	C21H20O10	Apigenin-7-O-β-D-glucoside*	Flavonoids	Flavonoid	-	A	FALSE	TRUE	TRUE	2648000	3110200	3484700	1553400	1716300	1866000	295750	378350	407160	--	--
mws1434	C21H20O10	Apigenin-6-C-glucoside (Isovitexin)*	Flavonoids	Flavonoid carbonoside	29702-25-8	A	TRUE	FALSE	FALSE	12707	17646	13684	4430	9029.8	6057.2	5506.8	11547	7923.5	C01714	ko00944
Lmgp004731	C21H20O10	5,7,4'-trihydroxy isoflavone-7-O-galactoside*	Flavonoids	Isoflavones	-	A	FALSE	TRUE	TRUE	2564700	2805300	3129300	1682700	1805900	1712000	337850	367270	463270	--	--
Lmdp003509	C20H18O11	Quercetin 3-O-β-D-xylopyranoside*	Flavonoids	Flavonols	549-32-6	A	FALSE	TRUE	TRUE	5297900	5667800	7251100	4128300	3619000	3513400	258120	281190	410810	--	--
mws2186	C20H18O11	Avicularin*	Flavonoids	Flavonols	572-30-5	A	TRUE	TRUE	TRUE	1847800	1947800	2583900	861120	702300	882490	150150	191430	224830	--	--
mws4183	C20H18O11	Quercetin-3-O-α-L-arabinopyranoside(guaijaverin)*	Flavonoids	Flavonols	22255-13-6	A	FALSE	TRUE	TRUE	1612800	1838500	1820900	1181200	933210	760020	133460	103950	162190	--	--
pmp000415	C22H22O10	3'-Methoxydaidzin	Flavonoids	Isoflavones	200127-80-6	B	FALSE	TRUE	TRUE	28608	35214	38836	13646	22064	16875	4002.6	2998.8	4281.3	--	--
mws0913	C21H20O11	Kaempferol-3-O-galactoside (Trifolin)*	Flavonoids	Flavonols	23627-87-4	A	TRUE	TRUE	TRUE	3540500	4653100	5302300	1789900	1794600	1560800	523980	629160	613330	C12626	ko00944
mws0045	C21H20O11	Quercetin-3-O-α-L-rhamnoside(Quercitrin )*	Flavonoids	Flavonols	522-12-3	A	FALSE	TRUE	FALSE	3598000	4029900	4106500	2112500	1882900	1997100	509920	857460	823530	C01750	ko00944
mws2209	C21H20O11	Kaempferol-3-O-glucoside (Astragalin)*	Flavonoids	Flavonols	480-10-4	A	TRUE	TRUE	TRUE	7260600	7687100	10781000	3251000	3670200	3661600	1061700	1004500	1271200	C12249	ko00944,ko01110
pme2459	C21H20O11	Luteolin-7-O-glucoside(Cynaroside)*	Flavonoids	Flavonoid	5373-11-5	A	FALSE	TRUE	TRUE	718030	741510	1002400	473590	444820	441260	73215	104940	111070	C03951	ko00944
pmn001640	C20H18O12	Myricetin-3-O-arabinoside	Flavonoids	Flavonols	132679-85-7	A	FALSE	TRUE	TRUE	762800	961750	1361200	563810	609100	606310	62494	66719	85511	--	--
Lmmn004625	C21H22O11	Dihydrokaempferol-7-O-glucoside	Flavonoids	Flavonols	-	B	FALSE	TRUE	TRUE	302350	369210	360210	181590	220960	181650	52763	62155	60795	--	--
mws0057	C21H22O11	Eriodictyol 7-O-glucoside	Flavonoids	Dihydroflavone	38965-51-4	B	FALSE	TRUE	TRUE	33102	44902	33851	22986	24037	21679	9	9	9	--	--
HJN041	C21H24O11	Epicatechin glucoside	Flavonoids	Flavonoid	-	B	TRUE	TRUE	TRUE	971500	1091600	1441100	584250	600900	560570	206760	201260	206570	--	--
pmp000579	C22H22O11	Diosmetin-7-O-galactoside*	Flavonoids	Flavonoid	-	A	FALSE	TRUE	TRUE	1956000	2147500	2240300	1107000	1161500	1133700	340500	370260	507180	--	--
Hmdn001667	C20H16O13	Ellagicacid-4-O-β-D-galloyl-β-Dglucopyranoside	Tannins	Tannin	-	B	FALSE	TRUE	TRUE	112010	105170	147480	131570	151970	148610	9	9	9	--	--
mws0091	C21H20O12	Quercetin-3-O-β-D-glucoside(Isoquercitrin)*	Flavonoids	Flavonols	482-35-9	A	FALSE	TRUE	TRUE	1301400	1220800	1728900	1511900	1567900	1529900	218620	254910	322530	C05623	ko00944,ko01100,ko01110
mws0056	C21H20O12	Myricetin-3-O-rhamnoside (Myricitrin)*	Flavonoids	Flavonols	17912-87-7	A	FALSE	TRUE	TRUE	7777200	6962500	9714100	4313300	3853600	4418000	761300	769080	919980	C10108	--
mws0061	C21H20O12	Quercetin-3-O-β-D-Galactoside (Hyperin)*	Flavonoids	Flavonols	482-36-0	A	FALSE	TRUE	TRUE	27623000	29825000	32170000	14744000	15457000	15499000	4493800	5101400	5666500	C10073	--
pme1598	C22H24O11	Hesperetin 5-O-glucoside	Flavonoids	Dihydroflavonol	69651-80-5	B	TRUE	TRUE	TRUE	14734000	15417000	17438000	7580300	7320400	8252500	2369000	2773600	3189300	--	--
pmn001641	C22H20O12	Kaempferide 3-O-β-D-glucuronide	Flavonoids	Flavonols	-	A	TRUE	TRUE	TRUE	10180	26674	15613	10129	7718.5	5198.5	9	9	9	--	--
Hmcp002298	C22H22O12	Limocitrin-O-arabinoside*	Flavonoids	Flavonoid	-	B	FALSE	TRUE	TRUE	65556	69026	84210	44243	76366	79754	5313.8	9023.8	10574	--	--
pme3391	C22H23O12+	Petunidin-3-O-glucoside	Flavonoids	Anthocyanins	6988-81-4	B	FALSE	TRUE	TRUE	247900	378410	398520	186360	195590	230110	13025	19028	31913	C12139	ko00942
Hmcp002268	C23H24O12	Limocitrin 3-rhamnoside*	Flavonoids	Flavonoid	-	A	FALSE	FALSE	TRUE	458070	567510	606560	663310	758440	655560	233370	214250	284290	--	--
Hmcp001636	C23H24O13	Limocitrin 7-glucoside	Flavonoids	Flavonoid	-	B	TRUE	FALSE	FALSE	108720	106170	117910	37545	35304	34833	41154	40495	54790	--	--
Cmcn006568	C30H18O10	Hinokiflavone(4',6''-O-Biapigenin)*	Flavonoids	Biflavones	19202-36-9	A	FALSE	TRUE	FALSE	4407200	5840500	6162700	3094500	2860900	2837200	804660	1249000	1184800	--	--
Cmcn006826	C30H18O10	Cupressuflavone*	Flavonoids	Biflavones	3952-18-9	A	FALSE	TRUE	FALSE	5020400	6173700	6829300	3463200	3192700	3295300	886430	1446400	1281400	--	--
Cmcp006260	C30H18O10	Robustaflavone*	Flavonoids	Biflavones	49620-13-5	A	FALSE	TRUE	FALSE	32224	40574	45461	22657	23011	22758	5979.9	7917.2	12041	--	--
mws0773	C30H18O10	Amentoflavone*	Flavonoids	Biflavones	1617-53-4	A	TRUE	TRUE	TRUE	3898100	4782400	5327500	12981000	12484000	12907000	529630	611300	676670	C10018	--
pmp000713	C22H34O15	6'-O-D-Glucosylloganic acid	Terpenoids	Sesquiterpenoids	-	B	TRUE	TRUE	FALSE	52770	72117	74299	10004	10288	8711.3	3297.4	3164.9	4614.4	--	--
Lmdn001925	C26H34O12	Olivil-4′-O-β-D-glucoside	Lignans and Coumarins	Lignans	76880-93-8	B	TRUE	TRUE	TRUE	247710	230310	211880	87463	101900	96284	22337	22113	19421	--	--
Hmln002355	C27H34O12	5'-Methoxymatairesinoside	Lignans and Coumarins	Lignans	1691201-82-7	B	FALSE	TRUE	TRUE	29829	27288	25181	32041	35371	30473	9	9	9	--	--
Rfmb25702	C28H34O12	Pinoresinol-acetylglucose	Lignans and Coumarins	Lignans	-	B	TRUE	FALSE	FALSE	25096	20626	19381	48240	61612	69708	28894	28605	37498	--	--
Hmcp001858	C26H28O14	Kaempferol-3-O-arabinosyl-7-O-rhamnoside	Flavonoids	Flavonols	-	B	TRUE	TRUE	TRUE	11882	20179	24575	6629	9672.8	8214	9	9	9	--	--
HJN076	C27H32O13	(2R)-Pinocembrin-7-neohesperidoside	Flavonoids	Flavonoid	-	B	FALSE	TRUE	TRUE	5301.6	7189.1	8502.5	5957	6388.3	5788.6	1723.6	1478.1	2062.9	--	--
pme0434	C30H26O12	Procyanidin B2	Tannins	Proanthocyanidins	29106-49-8	A	TRUE	FALSE	FALSE	7182700	7353100	7144100	14956000	14596000	15070000	11320000	10467000	11373000	C17639	--
Lmpp003930	C30H26O12	Apigenin-7-O-(2''-O-p-Coumarylglucoside)	Flavonoids	Flavonoid	-	B	FALSE	TRUE	FALSE	831560	709080	1024600	460630	527640	485970	160220	171640	210570	--	--
Lmjp001367	C26H29O15+	Cyanidin 3-O-(2''-O-xylopyranosyl)galactopyranoside	Flavonoids	Anthocyanins	-	B	FALSE	TRUE	TRUE	28517	35375	36461	46072	47657	44235	2117.2	4216	3127.7	--	--
HJN074	C31H28O12	Procyanidin A6	Tannins	Proanthocyanidins	-	B	TRUE	FALSE	FALSE	46405	61854	64257	131250	125020	110260	182590	184990	204290	--	--
pmb2586	C30H26O13	Gallocatechin-catechin	Flavonoids	Flavanols	-	B	TRUE	TRUE	FALSE	27829	45280	38800	15716	11489	14640	9798.5	2483.2	7272.5	--	--
pmp000593	C27H30O15	Luteolin-7-O-rutinoside*	Flavonoids	Flavonoid	3563-98-2	B	TRUE	TRUE	TRUE	107930	71744	97591	48642	55798	28689	4347	18582	9327.5	--	--
pmp001079	C27H30O15	Luteolin 7-O-neohesperidoside(Lonicerin)*	Flavonoids	Flavonoid	25694-72-8	B	FALSE	TRUE	TRUE	125280	128360	116600	99743	87382	78108	30791	26933	35154	C12630	ko00944
GQ512005	C27H30O15	Kaempferol-3-O-glucoside-7-O-rhamnoside*	Flavonoids	Flavonols	-	A	FALSE	TRUE	TRUE	68077	110650	161800	82703	66950	66902	16666	27086	30217	--	--
Lmmp001783	C30H26O14	Gallocatechin-gallocatechin	Tannins	Proanthocyanidins	-	B	TRUE	FALSE	TRUE	232450	258380	305720	608760	683920	675690	205860	214720	288480	--	--
Li512117	C27H30O16	Quercetin-3-O-neohesperidoside*	Flavonoids	Flavonols	117611-67-3	B	FALSE	TRUE	TRUE	113610	129160	143010	71469	112760	78002	18758	19580	20624	--	--
Zmxp003107	C27H30O16	Luteolin-di-O-glucoside*	Flavonoids	Flavonoid	-	A	FALSE	FALSE	TRUE	42366	55202	72161	83728	73709	52285	14736	18264	18874	--	--
Smsp001640	C27H31O16+	Petunidin-3-O-glucoside-O-arabinoside	Flavonoids	Anthocyanins	-	B	FALSE	FALSE	TRUE	384220	384440	461730	699780	793570	677380	187790	191770	224780	--	--
pme1777	C27H31O16+	Cyanidin-3,5-O-diglucoside (Cyanin)	Flavonoids	Anthocyanins	2611-67-8	B	FALSE	FALSE	TRUE	565270	619070	680010	1121200	1262000	1006700	296320	339420	359820	C08639	ko00942
HJAP137	C28H32O16	Isorhamnetin-O-glucoside-O-rhamnoside	Flavonoids	Flavonoid	-	B	TRUE	TRUE	TRUE	36854	44689	82064	27552	27051	20888	4175.2	6269.5	8366	--	--
HJAP124	C28H32O17	isorhamnetin-O-glucoside-O-glucoside	Flavonoids	Flavonoid	-	B	FALSE	FALSE	TRUE	44334	52509	56617	64593	63489	74665	21951	22231	19484	--	--
Lmgn002250	C31H34O17	Dicaffeoylquinic acid-glucoside	Phenolic acids	Phenolic acids	-	B	FALSE	TRUE	TRUE	90577	106180	148120	85066	70462	78461	14160	14099	22108	--	--
Cmcp006181	C36H28O15	Cupressuflavone-O-glucoside	Flavonoids	Biflavones	-	A	FALSE	FALSE	TRUE	378870	470890	515440	455800	535910	492670	126200	161670	226130	--	--
Lmyp005645	C36H28O15	Amentoflavone-glucoside	Flavonoids	Biflavones	-	A	FALSE	TRUE	TRUE	262250	289810	392740	200410	238200	243080	62759	58017	94773	--	--
pmn001368	C32H44O17	Olivil Diglucoside	Lignans and Coumarins	Lignans	-	B	TRUE	FALSE	FALSE	20026	24419	27141	12042	8397.9	8430.8	6315.2	6348.8	9338.8	--	--
Zmlp003063	C33H40O19	Luteolin-O-rutinoside-O-rhamnoside	Flavonoids	Flavonoid	-	B	TRUE	TRUE	TRUE	12278	15391	17214	4872.8	3352.5	4483	9	9	9	--	--
pmn001647	C45H38O18	Procyanidin C2	Tannins	Proanthocyanidins	37064-31-6	B	TRUE	FALSE	FALSE	651120	728190	749980	1464800	1380000	1414700	568670	762770	777440	--	--
Lmmp001653	C45H38O20	Gallocatechin-gallocatechin-catechin	Tannins	Proanthocyanidins	-	B	FALSE	FALSE	TRUE	225250	252800	292290	353940	354270	296380	72613	86387	99585	--	--
pmp000102	C60H50O24	Arecatannin A1*	Tannins	Proanthocyanidins	-	B	TRUE	FALSE	FALSE	22335	32432	27040	78442	67243	63156	20804	29164	24758	C17894	--
pmp000103	C60H50O24	Arecatannin A2*	Tannins	Proanthocyanidins	79763-29-4	B	TRUE	FALSE	FALSE	35938	56684	38331	112440	98942	98353	29427	42999	45264	C17893	--
