# Supplementary material for: Transcriptome and metabolome analyses of lignin biosynthesis mechanism of Platycladus orientalis
Source: PeerJ. 2022 Nov 2;10:e14172. doi: 10.7717/peerj.14172 (PMC9636869; doi:10.7717/peerj.14172)
Supplement: Table S5 [file peerj-10-14172-s010.xlsx]

## Sheet: Sheet1
Table S5 The gene expression in the stem measured by qRT-PCR
Gene ID		Gene expression
		RM1	RM2	RM3
Cluster-77994.4	1	10.6295	3.605	1.3566
	2	10.4831	3.45815	1.3566
	3	10.1261	3.16017	1.47427
	Mean	10.4129	3.40777	1.39583
	SD	0.258965	0.226657	0.0679339
Cluster-68496.0	1	6.63456	1.45397	0.697372
	2	6.72717	1.44393	0.752623
	3	6.27667	1.31039	0.790041
	Mean	6.54613	1.40277	0.746679
	SD	0.23791	0.0801536	0.0466199
Cluster-68156.0	1	9.12611	2.78949	0.260616
	2	9.71356	2.92817	0.267943
	3	9.84916	3.11666	0.271684
	Mean	9.56294	2.94477	0.266748
	SD	0.384334	0.164216	0.00562966
Cluster-59398.0	1	0.450625	1.12506	2.90795
	2	0.463294	1.38511	1.91853
	3	0.45376	1.10191	1.47427
	Mean	0.455893	1.20402	2.10025
	SD	0.00659834	0.157251	0.733909
Cluster-44281.95346	1	11.7942	4.53154	1.37554
	2	10.5561	5.09824	1.36604
	3	9.98664	5.1337	1.3566
	Mean	10.779	4.92116	1.36606
	SD	0.924139	0.337891	0.00946876
Cluster-44281.91549	1	6.49802	4.99332	0.479632
	2	9.64646	3.94493	0.68302
	3	9.71356	3.31728	0.664343
	Mean	8.61935	4.08518	0.608998
	SD	1.83743	0.846778	0.112423
Cluster-44281.83773	1	16.9123	11.7942	1.39474
	2	16.1113	10.5561	1.50525
	3	14.8254	9.98664	1.58008
	Mean	15.9497	10.779	1.49336
	SD	1.05279	0.924139	0.0932397
Cluster-44281.69804	1	11.7942	6.63456	1.37554
	2	10.5561	6.72717	1.36604
	3	9.98664	6.27667	1.3566
	Mean	10.779	6.54613	1.36606
	SD	0.924139	0.23791	0.00946876
Cluster-44281.68469	1	0.356013	1.21419	2.78949
	2	0.510506	1.08673	2.42839
	3	0.19751	1.54756	3.75809
	Mean	0.354676	1.28283	2.99199
	SD	0.156502	0.237959	0.687591
Cluster-44281.67555	1	0.447513	2.17347	8.28212
	2	0.285191	1.89212	6.10504
	3	0.178006	2.56685	6.06287
	Mean	0.30357	2.21081	6.81667
	SD	0.13569	0.338915	1.26929
Cluster-44281.66535	1	14.5203	5.06303	0.726986
	2	12.996	2.41162	0.726986
	3	12.295	4.46915	0.790041
	Mean	13.2704	3.98126	0.748005
	SD	1.13775	1.39141	0.0364049
Cluster-44281.47921	1	4.22807	1.61328	0.692555
	2	4.02782	1.7411	0.716978
	3	3.4822	3.78423	0.823591
	Mean	3.9127	2.37954	0.744374
	SD	0.386032	1.21818	0.0696819
Cluster-44281.38219	1	6.02099	2	0.607097
	2	5.85634	3.50642	0.582367
	3	6.19026	4.43828	0.528509
	Mean	6.02253	3.3149	0.572658
	SD	0.166964	1.23037	0.0401838
Cluster-44281.38217	1	9.98664	2.46229	0.363493
	2	9.38268	2.01391	0.363493
	3	9.64646	1.77769	0.395021
	Mean	9.67193	2.08463	0.374002
	SD	0.302787	0.347737	0.0182024
Cluster-44281.131789	1	1.61328	1.05702	0.346277
	2	1.7411	1.00696	0.358489
	3	3.78423	0.870551	0.205898
	Mean	2.37954	0.978175	0.303555
	SD	1.21818	0.0965079	0.0847935
Cluster-44281.131493	1	1.58008	1.23971	0.432269
	2	4.56305	1.6245	0.707107
	3	2.42839	0.852635	0.578344
	Mean	2.85718	1.23895	0.572573
	SD	1.53702	0.385936	0.13751
Cluster-44281.111830	1	25.4572	11.8762	0.668964
	2	19.2929	9.00047	0.747425
	3	19.0273	9.84916	0.517632
	Mean	21.2591	10.2419	0.644674
	SD	3.63803	1.47755	0.116806
Cluster-44281.111418	1	4.78991	2	0.381565
	2	4.99332	2.80889	0.574349
	3	4.92458	2.07053	0.469761
	Mean	4.9026	2.29314	0.475225
	SD	0.103469	0.448042	0.0965083
Cluster-44281.103971	1	9.64646	4.62675	1.23971
	2	8.11168	4.40762	1.23114
	3	9.12611	4.22807	1.32869
	Mean	8.96142	4.42082	1.26651
	SD	0.780535	0.199668	0.0540135
Cluster-44281.111976	1	11.7942	4.53154	1.37554
	2	10.5561	5.09824	1.36604
	3	9.98664	5.1337	1.3566
	Mean	10.779	4.92116	1.36606
	SD	0.924139	0.337891	0.00946876
