# Supplementary material for: Transcriptome and metabolome analyses of lignin biosynthesis mechanism of Platycladus orientalis
Source: PeerJ. 2022 Nov 2;10:e14172. doi: 10.7717/peerj.14172 (PMC9636869; doi:10.7717/peerj.14172)
Supplement: Table S6 [file peerj-10-14172-s011.xlsx]

## Sheet: metabolome
Table S6 The list of GO annotation of DEGs
RM-1_vs_RM-2_KEGG							RM-1_vs_RM-3_KEGG							RM-2_vs_RM-3_KEGG
Ontology	ID	Description	Count	GeneRatio	geneID		Ontology	ID	Description	Count	GeneRatio	geneID		Ontology	ID	Description	Count	GeneRatio	geneID
Cellular component	GO:0016020	membrane	2874	2874/10000	Cluster-44281.75219/Cluster-44281.79484/Cluster-44281.76379/Cluster-44281.53152/Cluster-44281.72734/Cluster-44281.76113/Cluster-44281.28761/Cluster-44281.45087/Cluster-44281.62803/Cluster-44281.44339/Cluster-44281.86001/Cluster-44281.59771/Cluster-44281.72155/Cluster-44281.61346/Cluster-44281.62880/Cluster-44281.96309/Cluster-44281.88968/Cluster-44281.80270/Cluster-44281.56987/Cluster-44281.76212…		Cellular component	GO:0016020	membrane	6702	6702/24801	Cluster-44281.108336/Cluster-44281.35639/Cluster-44281.60558/Cluster-44281.61346/Cluster-44281.62762/Cluster-44281.63286/Cluster-44281.63609/Cluster-44281.65157/Cluster-44281.66143/Cluster-44281.68183/Cluster-44281.70793/Cluster-44281.71225/Cluster-44281.71821/Cluster-44281.72350/Cluster-44281.72619/Cluster-44281.72727/Cluster-44281.72909/Cluster-44281.74512/Cluster-44281.76054/Cluster-44281.7611…		Cellular component	GO:0016020	membrane	5483	5483/19995	Cluster-44281.35639/Cluster-44281.45769/Cluster-44281.57544/Cluster-44281.59259/Cluster-44281.61943/Cluster-44281.62762/Cluster-44281.63609/Cluster-44281.64284/Cluster-44281.65157/Cluster-44281.68183/Cluster-44281.68920/Cluster-44281.69316/Cluster-44281.70290/Cluster-44281.70346/Cluster-44281.70667/Cluster-44281.70793/Cluster-44281.71103/Cluster-44281.71225/Cluster-44281.72350/Cluster-44281.72727…
Cellular component	GO:0005576	extracellular region	600	600/10000	Cluster-44281.75219/Cluster-44281.79484/Cluster-44281.45792/Cluster-44281.58885/Cluster-44281.74666/Cluster-44281.53152/Cluster-44281.72471/Cluster-44281.44339/Cluster-44281.58669/Cluster-44281.74091/Cluster-44281.76207/Cluster-44281.97209/Cluster-44281.61223/Cluster-44281.69722/Cluster-44281.75270/Cluster-44281.36423/Cluster-44281.68392/Cluster-44281.70099/Cluster-44281.105959/Cluster-44281.8975…		Cellular component	GO:0005576	extracellular region	1441	1441/24801	Cluster-44281.45792/Cluster-44281.60253/Cluster-44281.60928/Cluster-44281.61223/Cluster-44281.62445/Cluster-44281.68492/Cluster-44281.72350/Cluster-44281.72619/Cluster-44281.74253/Cluster-44281.74666/Cluster-44281.75371/Cluster-44281.80649/Cluster-44281.80794/Cluster-44281.83224/Cluster-44281.84562/Cluster-44281.64744/Cluster-44281.80686/Cluster-44281.76022/Cluster-44281.81740/Cluster-44281.81266…		Cellular component	GO:0005576	extracellular region	1217	1217/19995	Cluster-44281.44866/Cluster-44281.60253/Cluster-44281.60928/Cluster-44281.64744/Cluster-44281.68783/Cluster-44281.69478/Cluster-44281.69619/Cluster-44281.72350/Cluster-44281.74089/Cluster-44281.74253/Cluster-44281.74666/Cluster-44281.76022/Cluster-44281.80649/Cluster-44281.80681/Cluster-44281.81740/Cluster-44281.83224/Cluster-44281.88930/Cluster-44281.59982/Cluster-44281.74251/Cluster-44281.74421…
Cellular component	GO:0005623	cell	5321	5321/10000	Cluster-44281.75219/Cluster-44281.79484/Cluster-44281.82787/Cluster-44281.73313/Cluster-44281.79617/Cluster-44281.76379/Cluster-44281.73529/Cluster-44281.71185/Cluster-44281.67904/Cluster-44281.96917/Cluster-44281.103140/Cluster-44281.53152/Cluster-44281.72471/Cluster-44281.76113/Cluster-44281.65534/Cluster-44281.45087/Cluster-44281.62803/Cluster-44281.68906/Cluster-44281.86767/Cluster-44281.4433…		Cellular component	GO:0005623	cell	13188	13188/24801	Cluster-44281.108336/Cluster-44281.52139/Cluster-44281.54112/Cluster-44281.58990/Cluster-44281.60928/Cluster-44281.61346/Cluster-44281.61568/Cluster-44281.62445/Cluster-44281.63286/Cluster-44281.63609/Cluster-44281.65157/Cluster-44281.65748/Cluster-44281.66069/Cluster-44281.66143/Cluster-44281.66264/Cluster-44281.66727/Cluster-44281.67904/Cluster-44281.68183/Cluster-44281.68573/Cluster-44281.6931…		Cellular component	GO:0005623	cell	10388	10388/19995	Cluster-44281.42673/Cluster-44281.44866/Cluster-44281.45769/Cluster-44281.54112/Cluster-44281.57334/Cluster-44281.57544/Cluster-44281.59259/Cluster-44281.60928/Cluster-44281.61568/Cluster-44281.63302/Cluster-44281.63609/Cluster-44281.64284/Cluster-44281.64744/Cluster-44281.65157/Cluster-44281.65194/Cluster-44281.65534/Cluster-44281.65954/Cluster-44281.66264/Cluster-44281.67761/Cluster-44281.68001…
Cellular component	GO:0009295	nucleoid	14	14/10000	Cluster-44281.85963/Cluster-44281.48592/Cluster-44281.43598/Cluster-44281.77841/Cluster-44281.111180/Cluster-44281.99440/Cluster-44281.71127/Cluster-44281.5062/Cluster-44281.85244/Cluster-44281.43594/Cluster-44281.68021/Cluster-44281.135042/Cluster-44281.51407/Cluster-44281.59231		Cellular component	GO:0009295	nucleoid	29	29/24801	Cluster-44281.48592/Cluster-44281.85963/Cluster-44281.142611/Cluster-44281.89414/Cluster-44281.50406/Cluster-44281.129586/Cluster-44281.71127/Cluster-44281.98060/Cluster-44281.135042/Cluster-44281.115342/Cluster-44281.54483/Cluster-44281.99440/Cluster-44281.14506/Cluster-44281.43562/Cluster-44281.99485/Cluster-44281.51407/Cluster-44281.43594/Cluster-44281.107631/Cluster-44281.42930/Cluster-44281.…		Cellular component	GO:0009295	nucleoid	13	13/19995	Cluster-44281.48592/Cluster-44281.142611/Cluster-44281.111180/Cluster-44281.20099/Cluster-44281.97253/Cluster-44281.43594/Cluster-44281.129586/Cluster-44281.99440/Cluster-44281.114198/Cluster-44281.84146/Cluster-44281.88765/Cluster-44281.103149/Cluster-44281.87805
Cellular component	GO:0030054	cell junction	311	311/10000	Cluster-44281.86001/Cluster-44281.76207/Cluster-44281.75270/Cluster-44281.105959/Cluster-44281.68997/Cluster-44281.79333/Cluster-44281.76776/Cluster-44281.51349/Cluster-44281.93186/Cluster-44281.68922/Cluster-44281.70730/Cluster-44281.69526/Cluster-44281.78124/Cluster-44281.71954/Cluster-44281.62445/Cluster-44281.81171/Cluster-44281.59530/Cluster-44281.62252/Cluster-44281.21985/Cluster-44281.4237…		Cellular component	GO:0030054	cell junction	756	756/24801	Cluster-44281.62445/Cluster-44281.66727/Cluster-44281.72350/Cluster-44281.72619/Cluster-44281.74512/Cluster-44281.76776/Cluster-44281.83224/Cluster-44281.68920/Cluster-44281.81740/Cluster-44281.59982/Cluster-44281.77609/Cluster-44281.76378/Cluster-44281.67920/Cluster-44281.72894/Cluster-44281.49732/Cluster-44281.60894/Cluster-44281.44113/Cluster-44281.59489/Cluster-44281.59784/Cluster-44281.71424…		Cellular component	GO:0030054	cell junction	605	605/19995	Cluster-44281.44866/Cluster-44281.68920/Cluster-44281.72350/Cluster-44281.74512/Cluster-44281.76776/Cluster-44281.81740/Cluster-44281.83224/Cluster-44281.59982/Cluster-44281.59784/Cluster-44281.72422/Cluster-44281.49732/Cluster-44281.80394/Cluster-44281.60894/Cluster-44281.62252/Cluster-44281.77609/Cluster-44281.66727/Cluster-44281.76378/Cluster-44281.67462/Cluster-44281.82471/Cluster-44281.67920…
Cellular component	GO:0031974	membrane-enclosed lumen	368	368/10000	Cluster-44281.52802/Cluster-44281.84785/Cluster-44281.72941/Cluster-44281.46309/Cluster-44281.77912/Cluster-44281.43176/Cluster-44281.71548/Cluster-44281.96572/Cluster-44281.92813/Cluster-44281.36497/Cluster-44281.47177/Cluster-44281.62176/Cluster-44281.89086/Cluster-44281.92727/Cluster-44281.76529/Cluster-35827.0/Cluster-44281.49152/Cluster-44281.72662/Cluster-44281.72021/Cluster-44281.78226/Clu…		Cellular component	GO:0031974	membrane-enclosed lumen	920	920/24801	Cluster-44281.81009/Cluster-44281.72036/Cluster-44281.48537/Cluster-44281.73688/Cluster-44281.59369/Cluster-44281.81549/Cluster-44281.51606/Cluster-44281.84276/Cluster-44281.70582/Cluster-44281.28706/Cluster-44281.43178/Cluster-44281.86880/Cluster-44281.53838/Cluster-44281.73110/Cluster-44281.68483/Cluster-44281.37208/Cluster-44281.49507/Cluster-44281.77912/Cluster-44281.60751/Cluster-44281.92813…		Cellular component	GO:0031974	membrane-enclosed lumen	690	690/19995	Cluster-44281.77440/Cluster-44281.81009/Cluster-44281.81549/Cluster-44281.70582/Cluster-44281.72941/Cluster-44281.72036/Cluster-44281.68483/Cluster-44281.59369/Cluster-44281.73621/Cluster-44281.73688/Cluster-44281.59472/Cluster-44281.67226/Cluster-44281.48537/Cluster-44281.44237/Cluster-44281.36497/Cluster-44281.43178/Cluster-44281.51606/Cluster-44281.60249/Cluster-44281.28706/Cluster-44281.92727…
Cellular component	GO:0032991	protein-containing complex	897	897/10000	Cluster-44281.72471/Cluster-44281.76113/Cluster-44281.62880/Cluster-44281.96309/Cluster-44281.80270/Cluster-44281.75270/Cluster-44281.45930/Cluster-44281.79903/Cluster-44281.62357/Cluster-44281.81543/Cluster-44281.80962/Cluster-44281.82525/Cluster-44281.56945/Cluster-44281.79072/Cluster-44281.67514/Cluster-44281.71143/Cluster-44281.76390/Cluster-44281.79574/Cluster-44281.74471/Cluster-44281.81126…		Cellular component	GO:0032991	protein-containing complex	2119	2119/24801	Cluster-44281.61568/Cluster-44281.72909/Cluster-44281.76113/Cluster-44281.92566/Cluster-44281.76390/Cluster-44281.70735/Cluster-44281.72814/Cluster-44281.80270/Cluster-44281.75285/Cluster-44281.42173/Cluster-44281.71021/Cluster-44281.74722/Cluster-44281.70786/Cluster-44281.102470/Cluster-44281.45930/Cluster-44281.79903/Cluster-44281.79072/Cluster-44281.75309/Cluster-44281.63697/Cluster-44281.5160…		Cellular component	GO:0032991	protein-containing complex	1561	1561/19995	Cluster-44281.61568/Cluster-44281.75309/Cluster-44281.68938/Cluster-44281.70344/Cluster-44281.72941/Cluster-44281.69299/Cluster-44281.70735/Cluster-44281.63697/Cluster-44281.42173/Cluster-44281.72909/Cluster-44281.76128/Cluster-44281.92566/Cluster-44281.57498/Cluster-44281.73719/Cluster-44281.75270/Cluster-44281.94310/Cluster-44281.73621/Cluster-44281.104725/Cluster-44281.75271/Cluster-44281.6702…
Cellular component	GO:0043226	organelle	3689	3689/10000	Cluster-44281.79484/Cluster-44281.82787/Cluster-44281.73313/Cluster-44281.76379/Cluster-44281.73529/Cluster-44281.96917/Cluster-44281.103140/Cluster-44281.53152/Cluster-44281.72471/Cluster-44281.76113/Cluster-44281.65534/Cluster-44281.45087/Cluster-44281.62803/Cluster-44281.68906/Cluster-44281.86767/Cluster-44281.44339/Cluster-44281.74631/Cluster-44281.56372/Cluster-44281.77632/Cluster-44281.7215…		Cellular component	GO:0043226	organelle	9216	9216/24801	Cluster-44281.54112/Cluster-44281.61346/Cluster-44281.61568/Cluster-44281.62445/Cluster-44281.63286/Cluster-44281.63609/Cluster-44281.65748/Cluster-44281.66069/Cluster-44281.66143/Cluster-44281.66264/Cluster-44281.68183/Cluster-44281.68573/Cluster-44281.70376/Cluster-44281.70793/Cluster-44281.71132/Cluster-44281.71225/Cluster-44281.72350/Cluster-44281.72619/Cluster-44281.72727/Cluster-44281.72909…		Cellular component	GO:0043226	organelle	7056	7056/19995	Cluster-44281.42673/Cluster-44281.45769/Cluster-44281.54112/Cluster-44281.57334/Cluster-44281.61568/Cluster-44281.63302/Cluster-44281.63609/Cluster-44281.64284/Cluster-44281.65534/Cluster-44281.66264/Cluster-44281.67761/Cluster-44281.68001/Cluster-44281.68183/Cluster-44281.68573/Cluster-44281.68920/Cluster-44281.69298/Cluster-44281.70047/Cluster-44281.70290/Cluster-44281.70346/Cluster-44281.70793…
Cellular component	GO:0044215	other organism	1	1/10000	Cluster-44281.51402		Cellular component	GO:0044215	other organism	2	2/24801	Cluster-44281.44113/Cluster-44281.51402		Cellular component	GO:0044215	other organism	2	2/19995	Cluster-44281.44113/Cluster-44281.51402
Cellular component	GO:0044217	other organism part	1	1/10000	Cluster-44281.51402		Cellular component	GO:0044217	other organism part	2	2/24801	Cluster-44281.44113/Cluster-44281.51402		Cellular component	GO:0044217	other organism part	2	2/19995	Cluster-44281.44113/Cluster-44281.51402
Cellular component	GO:0044421	extracellular region part	45	45/10000	Cluster-44281.74666/Cluster-44281.62445/Cluster-44281.113926/Cluster-44281.44679/Cluster-44281.55306/Cluster-44281.24820/Cluster-44281.39647/Cluster-44281.59423/Cluster-44281.74133/Cluster-44281.68563/Cluster-44281.102737/Cluster-44281.84040/Cluster-44281.2152/Cluster-44281.26218/Cluster-44281.63260/Cluster-81073.1/Cluster-44281.62079/Cluster-44281.68381/Cluster-44281.34240/Cluster-44281.134490/C…		Cellular component	GO:0044421	extracellular region part	98	98/24801	Cluster-44281.62445/Cluster-44281.74666/Cluster-44281.80686/Cluster-44281.81740/Cluster-44281.74421/Cluster-44281.77609/Cluster-44281.76378/Cluster-44281.72894/Cluster-44281.58115/Cluster-44281.119486/Cluster-44281.59664/Cluster-44281.62688/Cluster-44281.97492/Cluster-44281.113926/Cluster-44281.134490/Cluster-44281.118695/Cluster-44281.70045/Cluster-44281.71379/Cluster-44281.77971/Cluster-44281.8…		Cellular component	GO:0044421	extracellular region part	92	92/19995	Cluster-44281.74666/Cluster-44281.81740/Cluster-44281.74421/Cluster-44281.77609/Cluster-44281.76378/Cluster-44281.119486/Cluster-44281.62445/Cluster-44281.58115/Cluster-44281.80686/Cluster-44281.59664/Cluster-44281.118695/Cluster-44281.72289/Cluster-44281.70045/Cluster-44281.97492/Cluster-44281.71379/Cluster-44281.77971/Cluster-44281.65715/Cluster-44281.85105/Cluster-44281.62688/Cluster-44281.471…
Cellular component	GO:0044422	organelle part	1774	1774/10000	Cluster-44281.79484/Cluster-44281.82787/Cluster-44281.76379/Cluster-44281.53152/Cluster-44281.72471/Cluster-44281.76113/Cluster-44281.45087/Cluster-44281.62803/Cluster-44281.44339/Cluster-44281.56372/Cluster-44281.72155/Cluster-44281.61346/Cluster-44281.62880/Cluster-44281.77486/Cluster-44281.96309/Cluster-44281.80270/Cluster-44281.75270/Cluster-44281.79903/Cluster-44281.62357/Cluster-44281.81543…		Cellular component	GO:0044422	organelle part	4178	4178/24801	Cluster-44281.61346/Cluster-44281.61568/Cluster-44281.63286/Cluster-44281.63609/Cluster-44281.66143/Cluster-44281.68183/Cluster-44281.72350/Cluster-44281.72619/Cluster-44281.72727/Cluster-44281.72909/Cluster-44281.73225/Cluster-44281.76054/Cluster-44281.76113/Cluster-44281.76776/Cluster-44281.80692/Cluster-44281.81049/Cluster-44281.82366/Cluster-44281.83224/Cluster-44281.81009/Cluster-44281.86201…		Cellular component	GO:0044422	organelle part	3154	3154/19995	Cluster-44281.45769/Cluster-44281.61568/Cluster-44281.63609/Cluster-44281.64284/Cluster-44281.68183/Cluster-44281.68920/Cluster-44281.70290/Cluster-44281.72350/Cluster-44281.72727/Cluster-44281.76054/Cluster-44281.76075/Cluster-44281.76379/Cluster-44281.76776/Cluster-44281.77440/Cluster-44281.80692/Cluster-44281.81009/Cluster-44281.81049/Cluster-44281.83224/Cluster-44281.90474/Cluster-44281.95986…
Cellular component	GO:0044425	membrane part	2205	2205/10000	Cluster-44281.76379/Cluster-44281.72734/Cluster-44281.76113/Cluster-44281.28761/Cluster-44281.62803/Cluster-44281.86001/Cluster-44281.72155/Cluster-44281.62880/Cluster-44281.96309/Cluster-44281.80270/Cluster-44281.56987/Cluster-44281.76212/Cluster-44281.74083/Cluster-44281.75730/Cluster-44281.57100/Cluster-44281.45930/Cluster-44281.79903/Cluster-44281.62357/Cluster-44281.81543/Cluster-44281.78861…		Cellular component	GO:0044425	membrane part	5180	5180/24801	Cluster-44281.35639/Cluster-44281.60558/Cluster-44281.62762/Cluster-44281.63286/Cluster-44281.63609/Cluster-44281.65157/Cluster-44281.66143/Cluster-44281.68183/Cluster-44281.70793/Cluster-44281.71821/Cluster-44281.72909/Cluster-44281.74512/Cluster-44281.76054/Cluster-44281.76113/Cluster-44281.76647/Cluster-44281.78091/Cluster-44281.79660/Cluster-44281.79667/Cluster-44281.80692/Cluster-44281.82366…		Cellular component	GO:0044425	membrane part	4271	4271/19995	Cluster-44281.35639/Cluster-44281.57544/Cluster-44281.59259/Cluster-44281.62762/Cluster-44281.63609/Cluster-44281.64284/Cluster-44281.65157/Cluster-44281.68183/Cluster-44281.68920/Cluster-44281.69316/Cluster-44281.70346/Cluster-44281.70793/Cluster-44281.71103/Cluster-44281.73414/Cluster-44281.74512/Cluster-44281.76054/Cluster-44281.76075/Cluster-44281.76379/Cluster-44281.76647/Cluster-44281.79660…
Cellular component	GO:0044464	cell part	5311	5311/10000	Cluster-44281.75219/Cluster-44281.79484/Cluster-44281.82787/Cluster-44281.73313/Cluster-44281.79617/Cluster-44281.76379/Cluster-44281.73529/Cluster-44281.71185/Cluster-44281.67904/Cluster-44281.96917/Cluster-44281.103140/Cluster-44281.53152/Cluster-44281.72471/Cluster-44281.76113/Cluster-44281.65534/Cluster-44281.45087/Cluster-44281.62803/Cluster-44281.68906/Cluster-44281.86767/Cluster-44281.4433…		Cellular component	GO:0044464	cell part	13167	13167/24801	Cluster-44281.108336/Cluster-44281.52139/Cluster-44281.54112/Cluster-44281.58990/Cluster-44281.60928/Cluster-44281.61346/Cluster-44281.61568/Cluster-44281.62445/Cluster-44281.63286/Cluster-44281.63609/Cluster-44281.65157/Cluster-44281.65748/Cluster-44281.66069/Cluster-44281.66143/Cluster-44281.66264/Cluster-44281.66727/Cluster-44281.67904/Cluster-44281.68183/Cluster-44281.68573/Cluster-44281.6931…		Cellular component	GO:0044464	cell part	10366	10366/19995	Cluster-44281.42673/Cluster-44281.44866/Cluster-44281.45769/Cluster-44281.54112/Cluster-44281.57334/Cluster-44281.57544/Cluster-44281.59259/Cluster-44281.60928/Cluster-44281.61568/Cluster-44281.63302/Cluster-44281.63609/Cluster-44281.64284/Cluster-44281.64744/Cluster-44281.65157/Cluster-44281.65194/Cluster-44281.65534/Cluster-44281.65954/Cluster-44281.66264/Cluster-44281.67761/Cluster-44281.68001…
Cellular component	GO:0055044	symplast	311	311/10000	Cluster-44281.86001/Cluster-44281.76207/Cluster-44281.75270/Cluster-44281.105959/Cluster-44281.68997/Cluster-44281.79333/Cluster-44281.76776/Cluster-44281.51349/Cluster-44281.93186/Cluster-44281.68922/Cluster-44281.70730/Cluster-44281.69526/Cluster-44281.78124/Cluster-44281.71954/Cluster-44281.62445/Cluster-44281.81171/Cluster-44281.59530/Cluster-44281.62252/Cluster-44281.21985/Cluster-44281.4237…		Cellular component	GO:0055044	symplast	756	756/24801	Cluster-44281.62445/Cluster-44281.66727/Cluster-44281.72350/Cluster-44281.72619/Cluster-44281.74512/Cluster-44281.76776/Cluster-44281.83224/Cluster-44281.68920/Cluster-44281.81740/Cluster-44281.59982/Cluster-44281.77609/Cluster-44281.76378/Cluster-44281.67920/Cluster-44281.72894/Cluster-44281.49732/Cluster-44281.60894/Cluster-44281.44113/Cluster-44281.59489/Cluster-44281.59784/Cluster-44281.71424…		Cellular component	GO:0055044	symplast	605	605/19995	Cluster-44281.44866/Cluster-44281.68920/Cluster-44281.72350/Cluster-44281.74512/Cluster-44281.76776/Cluster-44281.81740/Cluster-44281.83224/Cluster-44281.59982/Cluster-44281.59784/Cluster-44281.72422/Cluster-44281.49732/Cluster-44281.80394/Cluster-44281.60894/Cluster-44281.62252/Cluster-44281.77609/Cluster-44281.66727/Cluster-44281.76378/Cluster-44281.67462/Cluster-44281.82471/Cluster-44281.67920…
Cellular component	GO:0099080	supramolecular complex	79	79/10000	Cluster-44281.69228/Cluster-44281.74894/Cluster-44281.74891/Cluster-44281.94158/Cluster-44281.64158/Cluster-44281.86017/Cluster-44281.76453/Cluster-44281.74890/Cluster-44281.114618/Cluster-44281.78666/Cluster-44281.72814/Cluster-44281.66707/Cluster-44281.119360/Cluster-44281.59896/Cluster-44281.148701/Cluster-44281.100581/Cluster-44281.66005/Cluster-44281.110565/Cluster-44281.101980/Cluster-44281…		Cellular component	GO:0099080	supramolecular complex	190	190/24801	Cluster-44281.72814/Cluster-44281.85333/Cluster-44281.44113/Cluster-44281.69299/Cluster-44281.69223/Cluster-44281.56598/Cluster-44281.70617/Cluster-44281.71448/Cluster-44281.82692/Cluster-44281.80534/Cluster-44281.69473/Cluster-44281.69850/Cluster-44281.95967/Cluster-44281.81407/Cluster-44281.100603/Cluster-44281.50702/Cluster-44281.33698/Cluster-44281.75690/Cluster-44281.105644/Cluster-44281.105…		Cellular component	GO:0099080	supramolecular complex	177	177/19995	Cluster-44281.72522/Cluster-44281.69299/Cluster-44281.105771/Cluster-44281.74891/Cluster-44281.85333/Cluster-44281.71337/Cluster-44281.56598/Cluster-44281.59472/Cluster-44281.83561/Cluster-44281.80009/Cluster-44281.44113/Cluster-44281.69850/Cluster-44281.70617/Cluster-44281.138478/Cluster-44281.82692/Cluster-44281.69436/Cluster-44281.86650/Cluster-44281.69473/Cluster-44281.61778/Cluster-44281.692…
Molecular function	GO:0140110	transcription regulator activity	338	338/10000	Cluster-44281.73313/Cluster-44281.103140/Cluster-44281.65534/Cluster-44281.86767/Cluster-44281.74631/Cluster-44281.56637/Cluster-44281.85598/Cluster-44281.54326/Cluster-44281.63514/Cluster-44281.98653/Cluster-44281.90020/Cluster-44281.77912/Cluster-44281.80242/Cluster-44281.121234/Cluster-44281.21221/Cluster-44281.42764/Cluster-70722.0/Cluster-44281.61605/Cluster-44281.89942/Cluster-44281.92727/C…		Molecular function	GO:0140110	transcription regulator activity	918	918/24801	Cluster-44281.66069/Cluster-44281.66264/Cluster-44281.73313/Cluster-44281.75894/Cluster-44281.56637/Cluster-44281.82629/Cluster-44281.69595/Cluster-44281.69157/Cluster-44281.114990/Cluster-44281.65319/Cluster-44281.103140/Cluster-44281.64732/Cluster-44281.64250/Cluster-44281.56740/Cluster-44281.70487/Cluster-44281.105805/Cluster-44281.61261/Cluster-44281.68496/Cluster-44281.86315/Cluster-44281.71…		Molecular function	GO:0140110	transcription regulator activity	818	818/19995	Cluster-44281.65534/Cluster-44281.66264/Cluster-44281.73313/Cluster-44281.70833/Cluster-44281.63138/Cluster-44281.80242/Cluster-44281.86315/Cluster-44281.71242/Cluster-44281.71493/Cluster-44281.114990/Cluster-44281.105805/Cluster-44281.69157/Cluster-44281.42764/Cluster-44281.70487/Cluster-44281.66069/Cluster-44281.68496/Cluster-44281.64732/Cluster-44281.75894/Cluster-44281.82629/Cluster-44281.797…
Molecular function	GO:0003824	catalytic activity	3902	3902/10000	Cluster-44281.78103/Cluster-44281.82787/Cluster-44281.45792/Cluster-44281.79617/Cluster-44281.58885/Cluster-44281.74666/Cluster-44281.73529/Cluster-44281.71185/Cluster-44281.67904/Cluster-44281.96917/Cluster-44281.80374/Cluster-44281.49335/Cluster-44281.53152/Cluster-44281.72471/Cluster-44281.72734/Cluster-44281.28761/Cluster-44281.86153/Cluster-44281.68906/Cluster-44281.44339/Cluster-44281.56372…		Molecular function	GO:0003824	catalytic activity	9900	9900/24801	Cluster-44281.108336/Cluster-44281.35639/Cluster-44281.45792/Cluster-44281.52139/Cluster-44281.54112/Cluster-44281.60666/Cluster-44281.60928/Cluster-44281.61220/Cluster-44281.61223/Cluster-44281.61346/Cluster-44281.63286/Cluster-44281.66143/Cluster-44281.66727/Cluster-44281.67904/Cluster-44281.68573/Cluster-44281.68689/Cluster-44281.69313/Cluster-44281.69878/Cluster-44281.70034/Cluster-44281.7008…		Molecular function	GO:0003824	catalytic activity	7754	7754/19995	Cluster-44281.24394/Cluster-44281.35639/Cluster-44281.44866/Cluster-44281.45769/Cluster-44281.54112/Cluster-44281.57334/Cluster-44281.57544/Cluster-44281.57820/Cluster-44281.60928/Cluster-44281.61220/Cluster-44281.63302/Cluster-44281.64744/Cluster-44281.65194/Cluster-44281.65954/Cluster-44281.68573/Cluster-44281.68689/Cluster-44281.68783/Cluster-44281.68920/Cluster-44281.69298/Cluster-44281.69313…
Molecular function	GO:0045735	nutrient reservoir activity	19	19/10000	Cluster-44281.62230/Cluster-44281.76468/Cluster-44281.65410/Cluster-44281.97372/Cluster-44281.44322/Cluster-44281.46529/Cluster-44281.24820/Cluster-44281.106256/Cluster-44281.79818/Cluster-44281.6723/Cluster-44281.59823/Cluster-44281.72838/Cluster-44281.64215/Cluster-20279.0/Cluster-44281.77587/Cluster-30479.0/Cluster-44281.141531/Cluster-44281.103829/Cluster-44281.148117		Molecular function	GO:0045735	nutrient reservoir activity	51	51/24801	Cluster-44281.70083/Cluster-44281.71292/Cluster-44281.71295/Cluster-44281.76468/Cluster-44281.76102/Cluster-44281.73279/Cluster-44281.71699/Cluster-44281.59784/Cluster-44281.44322/Cluster-44281.97372/Cluster-44281.46529/Cluster-44281.73354/Cluster-44281.73026/Cluster-44281.62230/Cluster-44281.66405/Cluster-44281.79818/Cluster-44281.79537/Cluster-44281.67315/Cluster-44281.42640/Cluster-44281.69130…		Molecular function	GO:0045735	nutrient reservoir activity	41	41/19995	Cluster-44281.70083/Cluster-44281.71295/Cluster-44281.73279/Cluster-44281.76468/Cluster-44281.71699/Cluster-44281.59784/Cluster-44281.76102/Cluster-44281.71292/Cluster-44281.74857/Cluster-44281.65410/Cluster-44281.73354/Cluster-44281.67315/Cluster-44281.73026/Cluster-44281.59606/Cluster-44281.44322/Cluster-44281.97372/Cluster-44281.75649/Cluster-44281.106256/Cluster-44281.42640/Cluster-44281.6913…
Molecular function	GO:0005198	structural molecule activity	339	339/10000	Cluster-44281.56945/Cluster-44281.67514/Cluster-44281.83118/Cluster-44281.85963/Cluster-44281.51959/Cluster-44281.60458/Cluster-44281.96572/Cluster-44281.92813/Cluster-44281.53252/Cluster-44281.115459/Cluster-44281.90051/Cluster-44281.56942/Cluster-44281.122818/Cluster-44281.85831/Cluster-44281.102140/Cluster-44281.72021/Cluster-44281.71064/Cluster-44281.72453/Cluster-44281.58112/Cluster-44281.90…		Molecular function	GO:0005198	structural molecule activity	623	623/24801	Cluster-44281.61568/Cluster-44281.70786/Cluster-44281.69223/Cluster-44281.67514/Cluster-44281.67027/Cluster-44281.93264/Cluster-44281.92813/Cluster-44281.77099/Cluster-44281.71448/Cluster-44281.122818/Cluster-44281.68808/Cluster-44281.45821/Cluster-44281.82692/Cluster-44281.115459/Cluster-44281.125402/Cluster-44281.88595/Cluster-44281.80534/Cluster-44281.48492/Cluster-44281.66480/Cluster-44281.85…		Molecular function	GO:0005198	structural molecule activity	431	431/19995	Cluster-44281.61568/Cluster-44281.72522/Cluster-44281.94310/Cluster-44281.71337/Cluster-44281.67027/Cluster-44281.83561/Cluster-44281.80009/Cluster-44281.82692/Cluster-44281.86650/Cluster-44281.61778/Cluster-44281.69223/Cluster-44281.70786/Cluster-44281.43898/Cluster-44281.68564/Cluster-44281.58899/Cluster-44281.83118/Cluster-44281.79190/Cluster-44281.72021/Cluster-44281.35501/Cluster-44281.67612…
Molecular function	GO:0005215	transporter activity	604	604/10000	Cluster-44281.76379/Cluster-44281.64547/Cluster-44281.79072/Cluster-44281.98503/Cluster-44281.66342/Cluster-44281.74471/Cluster-44281.91717/Cluster-44281.64389/Cluster-44281.100569/Cluster-44281.68922/Cluster-44281.41781/Cluster-44281.57286/Cluster-44281.79743/Cluster-44281.94631/Cluster-44281.8662/Cluster-44281.84264/Cluster-41152.0/Cluster-20952.0/Cluster-44281.21985/Cluster-44281.133659/Cluste…		Molecular function	GO:0005215	transporter activity	1355	1355/24801	Cluster-44281.63609/Cluster-44281.65157/Cluster-44281.72909/Cluster-44281.79660/Cluster-44281.82366/Cluster-44281.91717/Cluster-44281.68920/Cluster-44281.56376/Cluster-44281.76075/Cluster-44281.71485/Cluster-44281.106417/Cluster-44281.63933/Cluster-44281.87463/Cluster-44281.71103/Cluster-44281.70735/Cluster-44281.64284/Cluster-44281.50173/Cluster-44281.57544/Cluster-44281.54707/Cluster-44281.5875…		Molecular function	GO:0005215	transporter activity	1057	1057/19995	Cluster-44281.57544/Cluster-44281.63609/Cluster-44281.64284/Cluster-44281.65157/Cluster-44281.68920/Cluster-44281.71103/Cluster-44281.76075/Cluster-44281.76379/Cluster-44281.79660/Cluster-44281.56376/Cluster-44281.85113/Cluster-44281.59784/Cluster-44281.87618/Cluster-44281.80394/Cluster-44281.67818/Cluster-44281.42444/Cluster-44281.67092/Cluster-44281.81615/Cluster-44281.75975/Cluster-44281.80878…
Molecular function	GO:0005488	binding	4569	4569/10000	Cluster-44281.78103/Cluster-44281.79484/Cluster-44281.73313/Cluster-44281.79617/Cluster-44281.58885/Cluster-44281.73529/Cluster-44281.71185/Cluster-44281.67904/Cluster-44281.96917/Cluster-44281.80374/Cluster-44281.103140/Cluster-44281.65812/Cluster-44281.49335/Cluster-44281.53152/Cluster-44281.72734/Cluster-44281.76113/Cluster-44281.65534/Cluster-44281.28761/Cluster-44281.45087/Cluster-44281.8676…		Molecular function	GO:0005488	binding	11191	11191/24801	Cluster-44281.108336/Cluster-44281.116345/Cluster-44281.35639/Cluster-44281.52139/Cluster-44281.54112/Cluster-44281.58990/Cluster-44281.60666/Cluster-44281.61220/Cluster-44281.61302/Cluster-44281.61346/Cluster-44281.61568/Cluster-44281.63286/Cluster-44281.65157/Cluster-44281.66069/Cluster-44281.66264/Cluster-44281.66727/Cluster-44281.67904/Cluster-44281.68183/Cluster-44281.68492/Cluster-44281.685…		Molecular function	GO:0005488	binding	8900	8900/19995	Cluster-44281.116345/Cluster-44281.24394/Cluster-44281.35639/Cluster-44281.42673/Cluster-44281.44866/Cluster-44281.45769/Cluster-44281.54112/Cluster-44281.57334/Cluster-44281.57544/Cluster-44281.57820/Cluster-44281.61220/Cluster-44281.61568/Cluster-44281.63487/Cluster-44281.65157/Cluster-44281.65194/Cluster-44281.65534/Cluster-44281.66264/Cluster-44281.68001/Cluster-44281.68183/Cluster-44281.6857…
Molecular function	GO:0090729	toxin activity	6	6/10000	Cluster-44281.124453/Cluster-44281.124450/Cluster-44281.124451/Cluster-44281.124455/Cluster-73580.0/Cluster-44281.124454		Molecular function	GO:0031386	protein tag	3	3/24801	Cluster-44281.90515/Cluster-44281.77323/Cluster-55035.0		Molecular function	GO:0031386	protein tag	1	1/19995	Cluster-44281.90515
Molecular function	GO:0016209	antioxidant activity	82	82/10000	Cluster-44281.82787/Cluster-44281.68997/Cluster-44281.76073/Cluster-44281.84793/Cluster-44281.91549/Cluster-44281.114297/Cluster-44281.102020/Cluster-44281.37531/Cluster-44281.85725/Cluster-44281.108592/Cluster-44281.80679/Cluster-44281.57336/Cluster-44281.84590/Cluster-44281.75438/Cluster-44281.54154/Cluster-44281.47921/Cluster-44281.64579/Cluster-77994.1/Cluster-44281.46866/Cluster-68496.0/Clus…		Molecular function	GO:0090729	toxin activity	6	6/24801	Cluster-44281.124453/Cluster-44281.124454/Cluster-44281.124451/Cluster-44281.124450/Cluster-44281.124455/Cluster-73580.0		Molecular function	GO:0016209	antioxidant activity	176	176/19995	Cluster-44281.44866/Cluster-44281.80649/Cluster-44281.93600/Cluster-44281.66727/Cluster-44281.87621/Cluster-44281.36157/Cluster-44281.80679/Cluster-44281.103522/Cluster-44281.109664/Cluster-44281.66933/Cluster-44281.44012/Cluster-44281.111277/Cluster-44281.91549/Cluster-44281.46415/Cluster-44281.82211/Cluster-44281.103414/Cluster-44281.63738/Cluster-44281.84590/Cluster-44281.66186/Cluster-44281.7…
Molecular function	GO:0098772	molecular function regulator	99	99/10000	Cluster-44281.79484/Cluster-44281.58669/Cluster-44281.77486/Cluster-44281.76073/Cluster-44281.81399/Cluster-44281.60842/Cluster-44281.72186/Cluster-44281.62176/Cluster-44281.113926/Cluster-44281.64661/Cluster-44281.93172/Cluster-44281.84546/Cluster-44281.52478/Cluster-44281.99793/Cluster-44281.93729/Cluster-44281.40048/Cluster-44281.73598/Cluster-44281.70848/Cluster-44281.79559/Cluster-44281.8358…		Molecular function	GO:0016209	antioxidant activity	225	225/24801	Cluster-44281.66727/Cluster-44281.80649/Cluster-44281.82211/Cluster-44281.93600/Cluster-44281.91549/Cluster-44281.82787/Cluster-44281.102020/Cluster-44281.103522/Cluster-44281.33519/Cluster-44281.36157/Cluster-44281.46415/Cluster-44281.44012/Cluster-44281.109664/Cluster-44281.80758/Cluster-44281.87621/Cluster-44281.82484/Cluster-44281.94647/Cluster-44281.31020/Cluster-44281.66988/Cluster-44281.65…		Molecular function	GO:0098772	molecular function regulator	202	202/19995	Cluster-44281.68783/Cluster-44281.88544/Cluster-44281.87140/Cluster-44281.67462/Cluster-44281.51049/Cluster-44281.76355/Cluster-44281.69267/Cluster-44281.63328/Cluster-44281.65282/Cluster-44281.71551/Cluster-44281.69359/Cluster-44281.71332/Cluster-44281.83587/Cluster-44281.64558/Cluster-44281.93172/Cluster-44281.56796/Cluster-44281.78293/Cluster-44281.76073/Cluster-44281.94271/Cluster-44281.10609…
Molecular function	GO:0045182	translation regulator activity	1	1/10000	Cluster-44281.145374		Molecular function	GO:0098772	molecular function regulator	247	247/24801	Cluster-44281.68783/Cluster-44281.71332/Cluster-44281.88544/Cluster-44281.65282/Cluster-44281.93172/Cluster-44281.77486/Cluster-44281.51049/Cluster-44281.63178/Cluster-44281.88487/Cluster-44281.41500/Cluster-44281.83587/Cluster-44281.79484/Cluster-44281.63328/Cluster-44281.106094/Cluster-44281.44897/Cluster-44281.50242/Cluster-44281.81399/Cluster-44281.76946/Cluster-44281.69577/Cluster-44281.6926…		Molecular function	GO:0045182	translation regulator activity	1	1/19995	Cluster-44281.145374
Molecular function	GO:0060089	molecular transducer activity	145	145/10000	Cluster-44281.74163/Cluster-44281.57286/Cluster-44281.115537/Cluster-44281.73936/Cluster-44281.60458/Cluster-44281.36263/Cluster-44281.60842/Cluster-44281.57303/Cluster-44281.62705/Cluster-44281.36922/Cluster-44281.114812/Cluster-44281.35664/Cluster-44281.28133/Cluster-44281.70690/Cluster-44281.79559/Cluster-44281.39817/Cluster-44281.36795/Cluster-44281.56164/Cluster-44281.45365/Cluster-44281.357…		Molecular function	GO:0045182	translation regulator activity	2	2/24801	Cluster-44281.145374/Cluster-36408.0		Molecular function	GO:0060089	molecular transducer activity	308	308/19995	Cluster-44281.87140/Cluster-44281.73762/Cluster-44281.63608/Cluster-44281.44306/Cluster-44281.62059/Cluster-44281.57717/Cluster-44281.72641/Cluster-44281.115537/Cluster-44281.71152/Cluster-44281.49372/Cluster-44281.62053/Cluster-44281.80557/Cluster-44281.68950/Cluster-44281.87053/Cluster-44281.102294/Cluster-44281.57303/Cluster-44281.62705/Cluster-44281.57286/Cluster-44281.112526/Cluster-44281.11…
Molecular function	GO:0140104	molecular carrier activity	4	4/10000	Cluster-44281.69094/Cluster-44281.90265/Cluster-44281.74732/Cluster-38377.0		Molecular function	GO:0060089	molecular transducer activity	308	308/24801	Cluster-44281.74163/Cluster-44281.71135/Cluster-44281.79013/Cluster-44281.87982/Cluster-44281.68950/Cluster-44281.44306/Cluster-44281.32767/Cluster-44281.63754/Cluster-44281.62053/Cluster-44281.57717/Cluster-44281.80900/Cluster-44281.62059/Cluster-44281.49254/Cluster-44281.46551/Cluster-44281.81951/Cluster-44281.70495/Cluster-44281.58008/Cluster-44281.35744/Cluster-44281.100900/Cluster-44281.6968…		Molecular function	GO:0140104	molecular carrier activity	12	12/19995	Cluster-44281.85147/Cluster-44281.69094/Cluster-44281.58363/Cluster-44281.62450/Cluster-44281.49563/Cluster-44281.75856/Cluster-44281.52882/Cluster-44281.65045/Cluster-44281.31800/Cluster-44281.91398/Cluster-44281.147585/Cluster-44281.90265
Biological process	GO:0000003	reproduction	439	439/10000	Cluster-44281.82491/Cluster-44281.60666/Cluster-44281.78861/Cluster-44281.72429/Cluster-44281.91717/Cluster-44281.80021/Cluster-44281.72941/Cluster-44281.93186/Cluster-44281.68922/Cluster-44281.71954/Cluster-44281.73936/Cluster-44281.81399/Cluster-44281.55602/Cluster-44281.43176/Cluster-44281.64238/Cluster-44281.117937/Cluster-44281.49824/Cluster-44281.69350/Cluster-44281.86628/Cluster-44281.1387…		Molecular function	GO:0140104	molecular carrier activity	14	14/24801	Cluster-44281.69094/Cluster-44281.85147/Cluster-44281.58363/Cluster-44281.62450/Cluster-44281.31800/Cluster-38377.0/Cluster-44281.49563/Cluster-44281.75856/Cluster-44281.90265/Cluster-44281.147585/Cluster-44281.111482/Cluster-44281.8293/Cluster-44281.99807/Cluster-44281.8299		Biological process	GO:0000003	reproduction	990	990/19995	Cluster-44281.63302/Cluster-44281.68920/Cluster-44281.74089/Cluster-44281.75309/Cluster-44281.59784/Cluster-44281.83212/Cluster-44281.60666/Cluster-44281.114990/Cluster-44281.69157/Cluster-44281.63978/Cluster-44281.64808/Cluster-44281.70487/Cluster-44281.72941/Cluster-44281.60635/Cluster-44281.61085/Cluster-44281.74378/Cluster-44281.41073/Cluster-44281.65664/Cluster-44281.69350/Cluster-44281.6589…
Biological process	GO:0008152	metabolic process	3879	3879/10000	Cluster-44281.78103/Cluster-44281.82787/Cluster-44281.73313/Cluster-44281.45792/Cluster-44281.74666/Cluster-44281.73529/Cluster-44281.71185/Cluster-44281.103140/Cluster-44281.49335/Cluster-44281.53152/Cluster-44281.72471/Cluster-44281.72734/Cluster-44281.76113/Cluster-44281.65534/Cluster-44281.68906/Cluster-44281.86767/Cluster-44281.44339/Cluster-44281.74631/Cluster-44281.77632/Cluster-44281.8249…		Biological process	GO:0000003	reproduction	1168	1168/24801	Cluster-44281.60666/Cluster-44281.91717/Cluster-44281.41073/Cluster-44281.68920/Cluster-44281.69157/Cluster-44281.61085/Cluster-44281.114990/Cluster-44281.63302/Cluster-44281.70487/Cluster-44281.82491/Cluster-44281.63978/Cluster-44281.54327/Cluster-44281.67100/Cluster-44281.72429/Cluster-44281.59784/Cluster-44281.64808/Cluster-44281.71021/Cluster-44281.76538/Cluster-44281.45085/Cluster-44281.7049…		Biological process	GO:0008152	metabolic process	7760	7760/19995	Cluster-44281.24394/Cluster-44281.35639/Cluster-44281.42673/Cluster-44281.44866/Cluster-44281.45769/Cluster-44281.54112/Cluster-44281.57334/Cluster-44281.57820/Cluster-44281.59259/Cluster-44281.60928/Cluster-44281.61220/Cluster-44281.61568/Cluster-44281.63302/Cluster-44281.64744/Cluster-44281.65194/Cluster-44281.65534/Cluster-44281.65954/Cluster-44281.66264/Cluster-44281.68001/Cluster-44281.68573…
Biological process	GO:0001906	cell killing	12	12/10000	Cluster-44281.62282/Cluster-44281.80681/Cluster-44281.3654/Cluster-44281.142097/Cluster-44281.60272/Cluster-44281.37147/Cluster-42126.0/Cluster-44281.145523/Cluster-44281.35213/Cluster-44281.84724/Cluster-44281.2457/Cluster-44281.5494		Biological process	GO:0008152	metabolic process	9886	9886/24801	Cluster-44281.35639/Cluster-44281.45792/Cluster-44281.54112/Cluster-44281.60666/Cluster-44281.60928/Cluster-44281.61220/Cluster-44281.61223/Cluster-44281.61568/Cluster-44281.63286/Cluster-44281.66069/Cluster-44281.66143/Cluster-44281.66264/Cluster-44281.66727/Cluster-44281.68573/Cluster-44281.68689/Cluster-44281.69313/Cluster-44281.69878/Cluster-44281.70034/Cluster-44281.70083/Cluster-44281.70376…		Biological process	GO:0001906	cell killing	16	16/19995	Cluster-44281.62282/Cluster-44281.80681/Cluster-44281.81266/Cluster-44281.72070/Cluster-44281.75363/Cluster-44281.145523/Cluster-44281.37147/Cluster-44281.3654/Cluster-44281.3538/Cluster-44281.84724/Cluster-44281.146718/Cluster-44281.132877/Cluster-44281.2457/Cluster-44281.35213/Cluster-44281.3653/Cluster-44281.46269
Biological process	GO:0002376	immune system process	473	473/10000	Cluster-44281.65812/Cluster-44281.82879/Cluster-44281.59771/Cluster-44281.76510/Cluster-44281.83231/Cluster-44281.67911/Cluster-44281.63761/Cluster-44281.80721/Cluster-44281.79333/Cluster-44281.52943/Cluster-44281.64288/Cluster-44281.88875/Cluster-44281.54043/Cluster-44281.57286/Cluster-44281.50666/Cluster-44281.72980/Cluster-44281.26409/Cluster-44281.71478/Cluster-44281.77885/Cluster-44281.58707…		Biological process	GO:0001906	cell killing	21	21/24801	Cluster-44281.62282/Cluster-44281.81266/Cluster-44281.80681/Cluster-44281.80430/Cluster-44281.75363/Cluster-44281.75362/Cluster-44281.72070/Cluster-44281.3654/Cluster-44281.2457/Cluster-44281.35213/Cluster-44281.145523/Cluster-44281.3538/Cluster-44281.46269/Cluster-44281.37147/Cluster-44281.132877/Cluster-44281.146718/Cluster-44281.60272/Cluster-44281.3653/Cluster-42126.0/Cluster-44281.5494/Clust…		Biological process	GO:0002376	immune system process	796	796/19995	Cluster-44281.63302/Cluster-44281.68183/Cluster-44281.72350/Cluster-44281.72980/Cluster-44281.76075/Cluster-44281.81009/Cluster-44281.59982/Cluster-44281.79324/Cluster-44281.80721/Cluster-44281.59771/Cluster-44281.67818/Cluster-44281.80794/Cluster-44281.78571/Cluster-44281.67911/Cluster-44281.84972/Cluster-44281.64425/Cluster-44281.85973/Cluster-44281.76538/Cluster-44281.59369/Cluster-44281.63761…
Biological process	GO:0006791	sulfur utilization	4	4/10000	Cluster-44281.21744/Cluster-534.0/Cluster-44281.4965/Cluster-44281.10484		Biological process	GO:0002376	immune system process	892	892/24801	Cluster-44281.68183/Cluster-44281.72350/Cluster-44281.72619/Cluster-44281.80794/Cluster-44281.81009/Cluster-44281.59982/Cluster-44281.76075/Cluster-44281.76510/Cluster-44281.63302/Cluster-44281.67100/Cluster-44281.72980/Cluster-44281.59369/Cluster-44281.89457/Cluster-44281.76538/Cluster-44281.79333/Cluster-44281.70018/Cluster-44281.85973/Cluster-44281.32767/Cluster-44281.32811/Cluster-44281.28706…		Biological process	GO:0006791	sulfur utilization	1	1/19995	Cluster-44281.10484
Biological process	GO:0040007	growth	163	163/10000	Cluster-44281.62282/Cluster-44281.104944/Cluster-44281.94800/Cluster-44281.64238/Cluster-44281.71548/Cluster-44281.92813/Cluster-44281.49824/Cluster-44281.64832/Cluster-44281.64757/Cluster-44281.56280/Cluster-44281.106239/Cluster-44281.62427/Cluster-44281.22293/Cluster-44281.51723/Cluster-44281.66141/Cluster-44281.88328/Cluster-44281.61248/Cluster-44281.71955/Cluster-44281.3654/Cluster-44281.8889…		Biological process	GO:0040007	growth	465	465/24801	Cluster-44281.62282/Cluster-44281.63609/Cluster-44281.65748/Cluster-44281.83224/Cluster-44281.63302/Cluster-44281.44113/Cluster-44281.48263/Cluster-44281.28234/Cluster-44281.73181/Cluster-44281.94800/Cluster-44281.80758/Cluster-44281.80430/Cluster-44281.95209/Cluster-44281.103650/Cluster-44281.94647/Cluster-44281.87908/Cluster-44281.61248/Cluster-44281.92813/Cluster-44281.71363/Cluster-44281.6193…		Biological process	GO:0040007	growth	383	383/19995	Cluster-44281.62282/Cluster-44281.63302/Cluster-44281.63609/Cluster-44281.83224/Cluster-44281.65748/Cluster-44281.72562/Cluster-44281.71363/Cluster-44281.61395/Cluster-44281.79830/Cluster-44281.48263/Cluster-44281.28234/Cluster-44281.56444/Cluster-44281.69266/Cluster-44281.71413/Cluster-44281.13842/Cluster-44281.55179/Cluster-44281.111277/Cluster-44281.77646/Cluster-44281.44113/Cluster-44281.6423…
Biological process	GO:0008283	cell proliferation	16	16/10000	Cluster-44281.113926/Cluster-44281.84134/Cluster-44281.75272/Cluster-44281.51729/Cluster-47248.0/Cluster-44281.142295/Cluster-44281.34896/Cluster-44281.80537/Cluster-17821.0/Cluster-43051.2/Cluster-44281.96453/Cluster-44281.103021/Cluster-44281.126272/Cluster-8186.0/Cluster-44281.70516/Cluster-44281.44807		Biological process	GO:0007610	behavior	2	2/24801	Cluster-44281.82851/Cluster-44281.125300		Biological process	GO:0007610	behavior	1	1/19995	Cluster-44281.82851
Biological process	GO:0009987	cellular process	4488	4488/10000	Cluster-44281.75219/Cluster-44281.82787/Cluster-44281.73313/Cluster-44281.76379/Cluster-44281.71185/Cluster-44281.103140/Cluster-44281.65812/Cluster-44281.49335/Cluster-44281.53152/Cluster-44281.72471/Cluster-44281.72734/Cluster-44281.76113/Cluster-44281.65534/Cluster-44281.86153/Cluster-44281.68906/Cluster-44281.86767/Cluster-44281.44339/Cluster-44281.82879/Cluster-44281.74631/Cluster-44281.7763…		Biological process	GO:0008283	cell proliferation	44	44/24801	Cluster-44281.113926/Cluster-44281.69688/Cluster-44281.65510/Cluster-44281.127311/Cluster-44281.88812/Cluster-44281.84134/Cluster-44281.55212/Cluster-44281.70516/Cluster-44281.23492/Cluster-44281.45351/Cluster-44281.142295/Cluster-44281.34896/Cluster-47248.0/Cluster-44281.27034/Cluster-44281.80537/Cluster-77913.0/Cluster-44281.97804/Cluster-44281.138814/Cluster-44281.116025/Cluster-43051.2/Cluste…		Biological process	GO:0008283	cell proliferation	31	31/19995	Cluster-44281.88812/Cluster-44281.65510/Cluster-44281.23492/Cluster-44281.127311/Cluster-44281.113926/Cluster-44281.27034/Cluster-44281.55212/Cluster-44281.119104/Cluster-44281.92962/Cluster-44281.102781/Cluster-44281.34896/Cluster-44281.16002/Cluster-44281.115812/Cluster-44281.44808/Cluster-44281.116025/Cluster-44281.111679/Cluster-44281.54880/Cluster-44281.77939/Cluster-44281.97804/Cluster-9106…
Biological process	GO:0015976	carbon utilization	4	4/10000	Cluster-44281.96917/Cluster-44281.56372/Cluster-44281.52057/Cluster-44281.63480		Biological process	GO:0009987	cellular process	11230	11230/24801	Cluster-44281.35639/Cluster-44281.54112/Cluster-44281.60666/Cluster-44281.60928/Cluster-44281.61220/Cluster-44281.61223/Cluster-44281.61568/Cluster-44281.62282/Cluster-44281.63286/Cluster-44281.63609/Cluster-44281.65748/Cluster-44281.66069/Cluster-44281.66143/Cluster-44281.66264/Cluster-44281.66727/Cluster-44281.68183/Cluster-44281.68573/Cluster-44281.68689/Cluster-44281.69313/Cluster-44281.69878…		Biological process	GO:0009987	cellular process	8918	8918/19995	Cluster-44281.24394/Cluster-44281.35639/Cluster-44281.42673/Cluster-44281.44866/Cluster-44281.45769/Cluster-44281.54112/Cluster-44281.57334/Cluster-44281.57820/Cluster-44281.59259/Cluster-44281.60928/Cluster-44281.61220/Cluster-44281.61568/Cluster-44281.62282/Cluster-44281.63302/Cluster-44281.63609/Cluster-44281.64284/Cluster-44281.64744/Cluster-44281.65194/Cluster-44281.65534/Cluster-44281.65954…
Biological process	GO:0019740	nitrogen utilization	3	3/10000	Cluster-44281.73954/Cluster-44281.95628/Cluster-44281.88037		Biological process	GO:0015976	carbon utilization	11	11/24801	Cluster-44281.73225/Cluster-44281.56372/Cluster-44281.96917/Cluster-44281.63907/Cluster-44281.52057/Cluster-44281.16002/Cluster-44281.44931/Cluster-5426.0/Cluster-44281.7215/Cluster-44281.63480/Cluster-44281.34336		Biological process	GO:0015976	carbon utilization	8	8/19995	Cluster-44281.73225/Cluster-44281.56372/Cluster-44281.96917/Cluster-44281.63907/Cluster-44281.44931/Cluster-44281.7215/Cluster-44281.16002/Cluster-5426.0
Biological process	GO:0022414	reproductive process	436	436/10000	Cluster-44281.82491/Cluster-44281.60666/Cluster-44281.78861/Cluster-44281.72429/Cluster-44281.91717/Cluster-44281.80021/Cluster-44281.72941/Cluster-44281.93186/Cluster-44281.68922/Cluster-44281.71954/Cluster-44281.73936/Cluster-44281.81399/Cluster-44281.55602/Cluster-44281.43176/Cluster-44281.64238/Cluster-44281.117937/Cluster-44281.49824/Cluster-44281.69350/Cluster-44281.86628/Cluster-44281.1387…		Biological process	GO:0019740	nitrogen utilization	4	4/24801	Cluster-44281.46900/Cluster-44281.87686/Cluster-44281.88037/Cluster-44281.102348		Biological process	GO:0019740	nitrogen utilization	1	1/19995	Cluster-44281.87686
Biological process	GO:0022610	biological adhesion	12	12/10000	Cluster-13352.0/Cluster-44281.88120/Cluster-44281.142097/Cluster-44281.85350/Cluster-44281.127463/Cluster-44281.84724/Cluster-44281.7737/Cluster-44281.117722/Cluster-44281.70250/Cluster-44281.5494/Cluster-44281.45777/Cluster-44281.70208		Biological process	GO:0022414	reproductive process	1166	1166/24801	Cluster-44281.60666/Cluster-44281.91717/Cluster-44281.41073/Cluster-44281.68920/Cluster-44281.69157/Cluster-44281.61085/Cluster-44281.114990/Cluster-44281.63302/Cluster-44281.70487/Cluster-44281.82491/Cluster-44281.63978/Cluster-44281.54327/Cluster-44281.67100/Cluster-44281.72429/Cluster-44281.59784/Cluster-44281.64808/Cluster-44281.71021/Cluster-44281.76538/Cluster-44281.45085/Cluster-44281.7049…		Biological process	GO:0022414	reproductive process	987	987/19995	Cluster-44281.63302/Cluster-44281.68920/Cluster-44281.74089/Cluster-44281.75309/Cluster-44281.59784/Cluster-44281.83212/Cluster-44281.60666/Cluster-44281.114990/Cluster-44281.69157/Cluster-44281.63978/Cluster-44281.64808/Cluster-44281.70487/Cluster-44281.72941/Cluster-44281.60635/Cluster-44281.61085/Cluster-44281.74378/Cluster-44281.41073/Cluster-44281.65664/Cluster-44281.69350/Cluster-44281.6589…
Biological process	GO:0023052	signaling	917	917/10000	Cluster-44281.65812/Cluster-44281.86153/Cluster-44281.86767/Cluster-44281.82879/Cluster-44281.74631/Cluster-44281.97691/Cluster-44281.59771/Cluster-44281.57785/Cluster-44281.56637/Cluster-44281.76510/Cluster-44281.88968/Cluster-44281.83231/Cluster-44281.67911/Cluster-44281.63761/Cluster-44281.39849/Cluster-44281.78457/Cluster-44281.80721/Cluster-44281.52943/Cluster-44281.80266/Cluster-44281.64288…		Biological process	GO:0022610	biological adhesion	23	23/24801	Cluster-44281.88120/Cluster-44281.75363/Cluster-44281.75362/Cluster-44281.127463/Cluster-44281.51236/Cluster-44281.3081/Cluster-13352.0/Cluster-44281.30793/Cluster-44281.45777/Cluster-44281.120273/Cluster-44281.109239/Cluster-44281.88717/Cluster-44281.50296/Cluster-44281.142302/Cluster-44281.70208/Cluster-44281.117722/Cluster-44281.110774/Cluster-44281.70250/Cluster-44281.93345/Cluster-44281.4449…		Biological process	GO:0022610	biological adhesion	23	23/19995	Cluster-44281.88120/Cluster-44281.127463/Cluster-44281.51236/Cluster-44281.75363/Cluster-44281.40818/Cluster-44281.30793/Cluster-44281.84724/Cluster-44281.58198/Cluster-44281.7737/Cluster-44281.45777/Cluster-44281.109239/Cluster-44281.85350/Cluster-44281.50296/Cluster-44281.3081/Cluster-44281.120273/Cluster-44281.78600/Cluster-44281.78354/Cluster-44281.88717/Cluster-44281.142302/Cluster-44281.755…
Biological process	GO:0032501	multicellular organismal process	805	805/10000	Cluster-44281.79484/Cluster-44281.71185/Cluster-44281.82491/Cluster-44281.60666/Cluster-44281.78861/Cluster-44281.33523/Cluster-44281.72429/Cluster-44281.91717/Cluster-44281.59564/Cluster-44281.80021/Cluster-44281.72941/Cluster-44281.64288/Cluster-44281.104944/Cluster-44281.68922/Cluster-44281.83569/Cluster-44281.92697/Cluster-44281.46309/Cluster-44281.18839/Cluster-44281.83016/Cluster-44281.7393…		Biological process	GO:0023052	signaling	2139	2139/24801	Cluster-44281.63609/Cluster-44281.66069/Cluster-44281.66264/Cluster-44281.68183/Cluster-44281.75894/Cluster-44281.97008/Cluster-44281.81009/Cluster-44281.56376/Cluster-44281.56637/Cluster-44281.86540/Cluster-44281.39849/Cluster-44281.69595/Cluster-44281.69157/Cluster-44281.65319/Cluster-44281.72036/Cluster-44281.71332/Cluster-44281.76510/Cluster-44281.63302/Cluster-44281.97691/Cluster-44281.50173…		Biological process	GO:0023052	signaling	1860	1860/19995	Cluster-44281.59259/Cluster-44281.63302/Cluster-44281.63609/Cluster-44281.66264/Cluster-44281.68183/Cluster-44281.70346/Cluster-44281.72980/Cluster-44281.73414/Cluster-44281.81009/Cluster-44281.97008/Cluster-44281.86540/Cluster-44281.80266/Cluster-44281.63138/Cluster-44281.56376/Cluster-44281.85113/Cluster-44281.79324/Cluster-44281.85291/Cluster-44281.83212/Cluster-44281.78734/Cluster-44281.71242…
Biological process	GO:0032502	developmental process	858	858/10000	Cluster-44281.75219/Cluster-44281.79484/Cluster-44281.71185/Cluster-44281.103140/Cluster-44281.74631/Cluster-44281.82491/Cluster-44281.56637/Cluster-44281.60666/Cluster-44281.78861/Cluster-44281.33523/Cluster-44281.72429/Cluster-44281.91717/Cluster-44281.88096/Cluster-44281.59564/Cluster-44281.80021/Cluster-44281.72941/Cluster-44281.64288/Cluster-44281.93186/Cluster-44281.104944/Cluster-44281.689…		Biological process	GO:0032501	multicellular organismal process	2085	2085/24801	Cluster-44281.60666/Cluster-44281.63609/Cluster-44281.69313/Cluster-44281.71185/Cluster-44281.80561/Cluster-44281.91717/Cluster-44281.41073/Cluster-44281.68920/Cluster-44281.92566/Cluster-44281.69595/Cluster-44281.69157/Cluster-44281.61085/Cluster-44281.114990/Cluster-44281.80693/Cluster-44281.70637/Cluster-44281.71135/Cluster-44281.63302/Cluster-44281.64284/Cluster-44281.69617/Cluster-44281.7048…		Biological process	GO:0032501	multicellular organismal process	1757	1757/19995	Cluster-44281.63302/Cluster-44281.63609/Cluster-44281.64284/Cluster-44281.68920/Cluster-44281.69313/Cluster-44281.74089/Cluster-44281.80561/Cluster-44281.80693/Cluster-44281.75309/Cluster-44281.59784/Cluster-44281.86315/Cluster-44281.83212/Cluster-44281.60666/Cluster-44281.69617/Cluster-44281.114990/Cluster-44281.69157/Cluster-44281.63978/Cluster-44281.64808/Cluster-44281.72562/Cluster-44281.7048…
Biological process	GO:0040011	locomotion	12	12/10000	Cluster-44281.19705/Cluster-44281.95288/Cluster-44281.144616/Cluster-44281.83670/Cluster-44281.122026/Cluster-57618.1/Cluster-44281.64289/Cluster-44281.45909/Cluster-77974.1/Cluster-1469.0/Cluster-44281.93500/Cluster-44281.47170		Biological process	GO:0032502	developmental process	2224	2224/24801	Cluster-44281.60666/Cluster-44281.63609/Cluster-44281.65748/Cluster-44281.69313/Cluster-44281.71185/Cluster-44281.80561/Cluster-44281.83224/Cluster-44281.91717/Cluster-44281.68920/Cluster-44281.56637/Cluster-44281.92566/Cluster-44281.69595/Cluster-44281.69157/Cluster-44281.61085/Cluster-44281.114990/Cluster-44281.65954/Cluster-44281.103140/Cluster-44281.80693/Cluster-44281.70637/Cluster-44281.711…		Biological process	GO:0032502	developmental process	1881	1881/19995	Cluster-44281.63302/Cluster-44281.63609/Cluster-44281.64284/Cluster-44281.65954/Cluster-44281.68920/Cluster-44281.69313/Cluster-44281.74089/Cluster-44281.80561/Cluster-44281.80693/Cluster-44281.83224/Cluster-44281.65748/Cluster-44281.75309/Cluster-44281.59784/Cluster-44281.86315/Cluster-44281.83212/Cluster-44281.44584/Cluster-44281.60666/Cluster-44281.69617/Cluster-44281.114990/Cluster-44281.6915…
Biological process	GO:0043473	pigmentation	4	4/10000	Cluster-44281.121234/Cluster-44281.75876/Cluster-44281.112751/Cluster-44281.51493		Biological process	GO:0040011	locomotion	38	38/24801	Cluster-44281.54327/Cluster-44281.80758/Cluster-44281.94647/Cluster-44281.81278/Cluster-44281.144616/Cluster-44281.111906/Cluster-44281.19705/Cluster-44281.111277/Cluster-57618.1/Cluster-44281.93500/Cluster-44281.65076/Cluster-44281.59063/Cluster-44281.65918/Cluster-44281.39077/Cluster-44281.122026/Cluster-44281.104369/Cluster-44281.43073/Cluster-44281.6392/Cluster-44281.122025/Cluster-44281.4035…		Biological process	GO:0040011	locomotion	30	30/19995	Cluster-44281.54327/Cluster-44281.93500/Cluster-44281.81278/Cluster-44281.111277/Cluster-44281.76292/Cluster-44281.94647/Cluster-44281.85239/Cluster-44281.111906/Cluster-44281.144616/Cluster-44281.59063/Cluster-44281.70606/Cluster-44281.39077/Cluster-44281.36272/Cluster-44281.122024/Cluster-32307.0/Cluster-57618.1/Cluster-44281.104369/Cluster-44281.50265/Cluster-44281.64289/Cluster-44281.34909/Cl…
Biological process	GO:0048511	rhythmic process	59	59/10000	Cluster-44281.42325/Cluster-44281.61728/Cluster-44281.73936/Cluster-44281.69588/Cluster-44281.75285/Cluster-44281.60842/Cluster-44281.89328/Cluster-44281.117907/Cluster-44281.111976/Cluster-44281.79559/Cluster-44281.132158/Cluster-44281.45365/Cluster-44281.69804/Cluster-44281.81457/Cluster-44281.46866/Cluster-44281.97591/Cluster-44281.45852/Cluster-44281.82540/Cluster-44281.123361/Cluster-44281.8…		Biological process	GO:0043473	pigmentation	13	13/24801	Cluster-44281.44800/Cluster-44281.121234/Cluster-44281.90451/Cluster-44281.13553/Cluster-44281.39937/Cluster-44281.51946/Cluster-44281.75876/Cluster-44281.11558/Cluster-44281.62114/Cluster-44281.12957/Cluster-44281.51607/Cluster-44281.103432/Cluster-44281.88336		Biological process	GO:0043473	pigmentation	11	11/19995	Cluster-44281.44800/Cluster-44281.39937/Cluster-44281.90451/Cluster-44281.121234/Cluster-44281.133935/Cluster-44281.12957/Cluster-44281.51946/Cluster-44281.88336/Cluster-44281.11558/Cluster-44281.51493/Cluster-44281.90161
Biological process	GO:0048518	positive regulation of biological process	325	325/10000	Cluster-44281.62282/Cluster-44281.80021/Cluster-44281.61728/Cluster-44281.72941/Cluster-44281.64288/Cluster-44281.104944/Cluster-44281.68922/Cluster-44281.57286/Cluster-44281.77912/Cluster-44281.78571/Cluster-44281.64238/Cluster-44281.21221/Cluster-44281.139646/Cluster-44281.42764/Cluster-44281.89942/Cluster-44281.92727/Cluster-44281.52569/Cluster-44281.108768/Cluster-44281.99793/Cluster-44281.11…		Biological process	GO:0048511	rhythmic process	153	153/24801	Cluster-44281.66727/Cluster-44281.70063/Cluster-44281.86540/Cluster-44281.65194/Cluster-44281.42325/Cluster-44281.63302/Cluster-44281.56703/Cluster-44281.70086/Cluster-44281.75285/Cluster-44281.71916/Cluster-44281.80743/Cluster-44281.109484/Cluster-44281.77404/Cluster-44281.58827/Cluster-44281.72278/Cluster-44281.89328/Cluster-44281.55871/Cluster-44281.61728/Cluster-44281.58203/Cluster-44281.8579…		Biological process	GO:0048511	rhythmic process	137	137/19995	Cluster-44281.63302/Cluster-44281.65194/Cluster-44281.86540/Cluster-44281.71916/Cluster-44281.70063/Cluster-44281.66727/Cluster-44281.87140/Cluster-44281.43763/Cluster-44281.69048/Cluster-44281.73719/Cluster-44281.85793/Cluster-44281.70086/Cluster-44281.56703/Cluster-44281.109484/Cluster-44281.80743/Cluster-44281.67656/Cluster-44281.45271/Cluster-44281.66430/Cluster-44281.60268/Cluster-44281.7227…
Biological process	GO:0048519	negative regulation of biological process	285	285/10000	Cluster-44281.62282/Cluster-44281.64288/Cluster-44281.83569/Cluster-44281.69228/Cluster-44281.90020/Cluster-44281.46309/Cluster-44281.78571/Cluster-44281.8662/Cluster-44281.42764/Cluster-70722.0/Cluster-44281.61605/Cluster-44281.138772/Cluster-44281.89328/Cluster-44281.84546/Cluster-44281.121170/Cluster-44281.96256/Cluster-44281.110046/Cluster-44281.28771/Cluster-44281.84134/Cluster-44281.22293/C…		Biological process	GO:0048518	positive regulation of biological process	828	828/24801	Cluster-44281.62282/Cluster-44281.65748/Cluster-44281.66264/Cluster-44281.75894/Cluster-44281.81009/Cluster-44281.68920/Cluster-44281.72036/Cluster-44281.71135/Cluster-44281.63302/Cluster-44281.64250/Cluster-44281.44113/Cluster-44281.59784/Cluster-44281.86315/Cluster-44281.59369/Cluster-44281.59259/Cluster-44281.82706/Cluster-44281.65232/Cluster-44281.96037/Cluster-44281.74089/Cluster-44281.52533…		Biological process	GO:0048518	positive regulation of biological process	724	724/19995	Cluster-44281.59259/Cluster-44281.62282/Cluster-44281.63302/Cluster-44281.66264/Cluster-44281.68920/Cluster-44281.74089/Cluster-44281.81009/Cluster-44281.65748/Cluster-44281.59784/Cluster-44281.86315/Cluster-44281.83212/Cluster-44281.65232/Cluster-44281.42764/Cluster-44281.72941/Cluster-44281.75894/Cluster-44281.72036/Cluster-44281.78571/Cluster-44281.64250/Cluster-44281.77472/Cluster-44281.82706…
Biological process	GO:0050789	regulation of biological process	1791	1791/10000	Cluster-44281.82787/Cluster-44281.65812/Cluster-44281.65534/Cluster-44281.86153/Cluster-44281.86767/Cluster-44281.82879/Cluster-44281.74631/Cluster-44281.97691/Cluster-44281.59771/Cluster-44281.57785/Cluster-44281.56637/Cluster-44281.96309/Cluster-44281.76510/Cluster-44281.88968/Cluster-44281.83231/Cluster-44281.67911/Cluster-44281.75270/Cluster-44281.63761/Cluster-44281.85598/Cluster-44281.39849…		Biological process	GO:0048519	negative regulation of biological process	792	792/24801	Cluster-44281.62282/Cluster-44281.75894/Cluster-44281.80561/Cluster-44281.76075/Cluster-44281.69157/Cluster-44281.80693/Cluster-44281.64732/Cluster-44281.56703/Cluster-44281.69617/Cluster-44281.60894/Cluster-44281.55634/Cluster-44281.61261/Cluster-44281.44113/Cluster-44281.67100/Cluster-44281.83569/Cluster-44281.66011/Cluster-44281.79261/Cluster-44281.87982/Cluster-44281.95495/Cluster-44281.86150…		Biological process	GO:0048519	negative regulation of biological process	643	643/19995	Cluster-44281.62282/Cluster-44281.76075/Cluster-44281.80561/Cluster-44281.80693/Cluster-44281.63138/Cluster-44281.71242/Cluster-44281.60894/Cluster-44281.55634/Cluster-44281.69617/Cluster-44281.67818/Cluster-44281.69157/Cluster-44281.42764/Cluster-44281.64732/Cluster-44281.75894/Cluster-44281.78571/Cluster-44281.61261/Cluster-44281.86150/Cluster-44281.85973/Cluster-44281.71745/Cluster-44281.66011…
Biological process	GO:0050896	response to stimulus	2429	2429/10000	Cluster-44281.79484/Cluster-44281.82787/Cluster-44281.76379/Cluster-44281.74666/Cluster-44281.65812/Cluster-44281.53152/Cluster-44281.72471/Cluster-44281.9732/Cluster-44281.76113/Cluster-44281.65534/Cluster-44281.45087/Cluster-44281.62803/Cluster-44281.86153/Cluster-44281.86767/Cluster-44281.82879/Cluster-44281.74631/Cluster-44281.77632/Cluster-44281.97691/Cluster-44281.52464/Cluster-44281.59771/…		Biological process	GO:0050789	regulation of biological process	4369	4369/24801	Cluster-44281.62282/Cluster-44281.63609/Cluster-44281.65748/Cluster-44281.66069/Cluster-44281.66264/Cluster-44281.68183/Cluster-44281.71132/Cluster-44281.73152/Cluster-44281.75894/Cluster-44281.80561/Cluster-44281.80794/Cluster-44281.97008/Cluster-44281.81009/Cluster-44281.42673/Cluster-44281.68920/Cluster-44281.74163/Cluster-44281.56637/Cluster-44281.82629/Cluster-44281.76075/Cluster-44281.86540…		Biological process	GO:0050789	regulation of biological process	3725	3725/19995	Cluster-44281.42673/Cluster-44281.45769/Cluster-44281.59259/Cluster-44281.62282/Cluster-44281.63302/Cluster-44281.63609/Cluster-44281.64284/Cluster-44281.65534/Cluster-44281.66264/Cluster-44281.68183/Cluster-44281.68920/Cluster-44281.70346/Cluster-44281.72980/Cluster-44281.73414/Cluster-44281.74089/Cluster-44281.76075/Cluster-44281.80561/Cluster-44281.80693/Cluster-44281.81009/Cluster-44281.85300…
Biological process	GO:0051179	localization	822	822/10000	Cluster-44281.76379/Cluster-44281.65534/Cluster-44281.60996/Cluster-44281.78861/Cluster-44281.64547/Cluster-44281.85598/Cluster-44281.63152/Cluster-44281.79072/Cluster-44281.74163/Cluster-44281.98503/Cluster-44281.74471/Cluster-44281.91717/Cluster-44281.100569/Cluster-44281.68922/Cluster-44281.41781/Cluster-44281.57286/Cluster-44281.115537/Cluster-44281.94631/Cluster-44281.43176/Cluster-44281.139…		Biological process	GO:0050896	response to stimulus	5758	5758/24801	Cluster-44281.108336/Cluster-44281.52464/Cluster-44281.62282/Cluster-44281.63286/Cluster-44281.63609/Cluster-44281.65748/Cluster-44281.66069/Cluster-44281.66143/Cluster-44281.66264/Cluster-44281.66727/Cluster-44281.68183/Cluster-44281.68573/Cluster-44281.70034/Cluster-44281.71631/Cluster-44281.72350/Cluster-44281.72619/Cluster-44281.72727/Cluster-44281.72909/Cluster-44281.73519/Cluster-44281.7466…		Biological process	GO:0050896	response to stimulus	4867	4867/19995	Cluster-44281.44866/Cluster-44281.45769/Cluster-44281.59259/Cluster-44281.61943/Cluster-44281.62282/Cluster-44281.63302/Cluster-44281.63609/Cluster-44281.64284/Cluster-44281.65194/Cluster-44281.65534/Cluster-44281.66264/Cluster-44281.68183/Cluster-44281.68573/Cluster-44281.68920/Cluster-44281.69298/Cluster-44281.69316/Cluster-44281.70034/Cluster-44281.70152/Cluster-44281.70346/Cluster-44281.70667…
Biological process	GO:0051704	multi-organism process	837	837/10000	Cluster-44281.79484/Cluster-44281.65812/Cluster-44281.82879/Cluster-44281.59771/Cluster-44281.58669/Cluster-44281.56637/Cluster-44281.76510/Cluster-44281.67911/Cluster-44281.76212/Cluster-44281.69282/Cluster-44281.69722/Cluster-44281.36423/Cluster-44281.57100/Cluster-44281.78861/Cluster-44281.42720/Cluster-44281.62282/Cluster-44281.74163/Cluster-44281.79333/Cluster-44281.84822/Cluster-44281.33268…		Biological process	GO:0051179	localization	1950	1950/24801	Cluster-44281.65748/Cluster-44281.72909/Cluster-44281.79660/Cluster-44281.91717/Cluster-44281.68920/Cluster-44281.74163/Cluster-44281.56376/Cluster-44281.76075/Cluster-44281.92566/Cluster-44281.71485/Cluster-44281.106417/Cluster-44281.65954/Cluster-44281.89816/Cluster-44281.71135/Cluster-44281.71103/Cluster-44281.70735/Cluster-44281.64284/Cluster-44281.50173/Cluster-44281.82138/Cluster-44281.5470…		Biological process	GO:0051179	localization	1536	1536/19995	Cluster-44281.64284/Cluster-44281.65534/Cluster-44281.65954/Cluster-44281.68920/Cluster-44281.70346/Cluster-44281.71103/Cluster-44281.71867/Cluster-44281.76075/Cluster-44281.76379/Cluster-44281.76860/Cluster-44281.79660/Cluster-44281.80018/Cluster-44281.89816/Cluster-44281.65748/Cluster-44281.56376/Cluster-44281.85113/Cluster-44281.80394/Cluster-44281.44584/Cluster-44281.84951/Cluster-44281.67818…
Biological process	GO:0065007	biological regulation	1969	1969/10000	Cluster-44281.82787/Cluster-44281.76379/Cluster-44281.65812/Cluster-44281.49335/Cluster-44281.65534/Cluster-44281.45087/Cluster-44281.86153/Cluster-44281.86767/Cluster-44281.44339/Cluster-44281.82879/Cluster-44281.74631/Cluster-44281.82491/Cluster-44281.97691/Cluster-44281.59771/Cluster-44281.57785/Cluster-44281.56637/Cluster-44281.96309/Cluster-44281.76510/Cluster-44281.88968/Cluster-44281.77803…		Biological process	GO:0051704	multi-organism process	1802	1802/24801	Cluster-44281.62282/Cluster-44281.66143/Cluster-44281.66264/Cluster-44281.66727/Cluster-44281.68183/Cluster-44281.72350/Cluster-44281.72619/Cluster-44281.73519/Cluster-44281.80561/Cluster-44281.80794/Cluster-44281.84822/Cluster-44281.81009/Cluster-44281.41073/Cluster-44281.86201/Cluster-44281.74163/Cluster-44281.56637/Cluster-44281.69282/Cluster-44281.81266/Cluster-44281.59982/Cluster-44281.82629…		Biological process	GO:0051704	multi-organism process	1557	1557/19995	Cluster-44281.45769/Cluster-44281.62282/Cluster-44281.63302/Cluster-44281.66264/Cluster-44281.68183/Cluster-44281.72350/Cluster-44281.73519/Cluster-44281.74089/Cluster-44281.76075/Cluster-44281.80561/Cluster-44281.80681/Cluster-44281.80693/Cluster-44281.81009/Cluster-44281.59982/Cluster-44281.66143/Cluster-44281.42720/Cluster-44281.83212/Cluster-44281.81266/Cluster-44281.65867/Cluster-44281.59771…
Biological process	GO:0071840	cellular component organization or biogenesis	902	902/10000	Cluster-44281.75219/Cluster-44281.76379/Cluster-44281.71185/Cluster-44281.103140/Cluster-44281.58669/Cluster-44281.74091/Cluster-44281.61223/Cluster-44281.89754/Cluster-44281.64078/Cluster-44281.79072/Cluster-44281.68997/Cluster-44281.74163/Cluster-44281.76390/Cluster-44281.68358/Cluster-44281.88096/Cluster-44281.80021/Cluster-44281.61728/Cluster-44281.84785/Cluster-44281.72941/Cluster-44281.9318…		Biological process	GO:0065007	biological regulation	4814	4814/24801	Cluster-44281.35639/Cluster-44281.60666/Cluster-44281.62282/Cluster-44281.63609/Cluster-44281.65157/Cluster-44281.65748/Cluster-44281.66069/Cluster-44281.66264/Cluster-44281.68183/Cluster-44281.71132/Cluster-44281.72727/Cluster-44281.73152/Cluster-44281.75894/Cluster-44281.80561/Cluster-44281.80794/Cluster-44281.81049/Cluster-44281.82366/Cluster-44281.91717/Cluster-44281.97008/Cluster-44281.81009…		Biological process	GO:0065007	biological regulation	4081	4081/19995	Cluster-44281.35639/Cluster-44281.42673/Cluster-44281.45769/Cluster-44281.59259/Cluster-44281.62282/Cluster-44281.63302/Cluster-44281.63609/Cluster-44281.64284/Cluster-44281.65157/Cluster-44281.65534/Cluster-44281.66264/Cluster-44281.68183/Cluster-44281.68920/Cluster-44281.70346/Cluster-44281.72727/Cluster-44281.72980/Cluster-44281.73414/Cluster-44281.74089/Cluster-44281.76075/Cluster-44281.76379…
Biological process	GO:0098754	detoxification	14	14/10000	Cluster-44281.63152/Cluster-44281.79869/Cluster-44281.140686/Cluster-44281.117272/Cluster-44281.64579/Cluster-27313.0/Cluster-44281.110440/Cluster-28855.1/Cluster-44281.86125/Cluster-44281.84825/Cluster-44281.130229/Cluster-39189.0/Cluster-44281.109441/Cluster-44281.32432		Biological process	GO:0071840	cellular component organization or biogenesis	2250	2250/24801	Cluster-44281.60928/Cluster-44281.61223/Cluster-44281.65748/Cluster-44281.66727/Cluster-44281.69313/Cluster-44281.71185/Cluster-44281.72909/Cluster-44281.74253/Cluster-44281.83224/Cluster-44281.64744/Cluster-44281.74163/Cluster-44281.68783/Cluster-44281.75492/Cluster-44281.76075/Cluster-44281.92566/Cluster-44281.65954/Cluster-44281.72036/Cluster-44281.60358/Cluster-44281.103140/Cluster-44281.7461…		Biological process	GO:0071840	cellular component organization or biogenesis	1783	1783/19995	Cluster-44281.44866/Cluster-44281.60928/Cluster-44281.64744/Cluster-44281.65954/Cluster-44281.68783/Cluster-44281.69313/Cluster-44281.71867/Cluster-44281.74089/Cluster-44281.74253/Cluster-44281.76075/Cluster-44281.76379/Cluster-44281.77440/Cluster-44281.83224/Cluster-44281.85840/Cluster-44281.65748/Cluster-44281.74251/Cluster-44281.74610/Cluster-44281.68938/Cluster-44281.60894/Cluster-44281.44584…
							Biological process	GO:0098754	detoxification	44	44/24801	Cluster-44281.70034/Cluster-44281.106416/Cluster-44281.63152/Cluster-44281.83735/Cluster-44281.77920/Cluster-44281.79869/Cluster-44281.53202/Cluster-44281.110440/Cluster-44281.140686/Cluster-44281.87214/Cluster-44281.64579/Cluster-44281.22674/Cluster-39189.0/Cluster-44281.27417/Cluster-44281.109440/Cluster-44281.74043/Cluster-44281.8146/Cluster-27313.0/Cluster-44281.86125/Cluster-44281.128937/Clu…		Biological process	GO:0098754	detoxification	24	24/19995	Cluster-44281.70034/Cluster-44281.79869/Cluster-44281.83735/Cluster-44281.106416/Cluster-44281.53202/Cluster-44281.117272/Cluster-44281.77920/Cluster-44281.63283/Cluster-44281.91992/Cluster-17896.0/Cluster-44281.74043/Cluster-44281.128937/Cluster-44281.109440/Cluster-44281.140686/Cluster-44281.27417/Cluster-44281.8146/Cluster-44501.0/Cluster-44281.62914/Cluster-44281.65571/Cluster-44281.87214/Clu…

## Sheet: transcriptome
Table S6 The list of KEGG analysis of DMs and DEGs
RM-1_vs_RM-2_KEGG									RM-1_vs_RM-3_KEGG									RM-2_vs_RM-3_KEGG
#Kegg_pathway	ko_id	Cluter_frequency	Genome_frequency	P-value	Corrected_P-value	GeneID	KEGG Orthology		#Kegg_pathway	ko_id	Cluter_frequency	Genome_frequency	P-value	Corrected_P-value	GeneID	KEGG Orthology		#Kegg_pathway	ko_id	Cluter_frequency	Genome_frequency	P-value	Corrected_P-value	GeneID	KEGG Orthology
Monoterpenoid biosynthesis	ko00902	56 out of 3435 1.63027656477438%	275 out of 58977 0.466283466436068%	1.54854e-12	2.05956e-10	Cluster-44281.118896;Cluster-44281.125537;Cluster-44281.25303;Cluster-44281.33272;Cluster-44281.84001;Cluster-44281.135514;Cluster-44281.135515;Cluster-44281.136764;Cluster-44281.27073;Cluster-44281.5695;Cluster-44281.74752;Cluster-44281.74753;Cluster-44281.92161;Cluster-44281.120952;Cluster-44281.132954;Cluster-44281.39568;Cluster-44281.60583;Cluster-44281.80465;Cluster-54670.3;Cluster-11560.0;C…	K07385+K07385+K07385+K07385+K07385+K15095+K15095+K15095+K15095+K15095+K15095+K15095+K15095+K18108+K20618+K21373+K21373+K21373+K21373+K21374+K21374+K21374+K21374+K21374+K21374+K21374+K21374+K21374+K21374+K21374+K21374+K21374+K21374+K21374+K21374+K21374+K21374+K21374+K21374+K21374+K21374+K21374+K21374+K21374+K21374+K21374+K21374+K21374+K21374+K21374+K21374+K21374+K21374+K21374+K21374+K21374		Biosynthesis of secondary metabolites	ko01110	2167 out of 8252 26.2603005332041%	13139 out of 58977 22.2781762381946%	0	0	Cluster-44281.113887;Cluster-44281.115133;Cluster-44281.115134;Cluster-44281.140179;Cluster-56640.0;Cluster-896.0;Cluster-44281.101432;Cluster-44281.106550;Cluster-44281.106965;Cluster-44281.116006;Cluster-44281.122310;Cluster-44281.127884;Cluster-44281.128135;Cluster-44281.130302;Cluster-44281.19097;Cluster-44281.337;Cluster-44281.37743;Cluster-44281.41080;Cluster-44281.49449;Cluster-44281.50056…	K00001+K00001+K00001+K00001+K00001+K00001+K00002+K00002+K00002+K00002+K00002+K00002+K00002+K00002+K00002+K00002+K00002+K00002+K00002+K00002+K00002+K00002+K00002+K00002+K00002+K00002+K00002+K00002+K00002+K00002+K00002+K00002+K00002+K00002+K00002+K00002+K00002+K00002+K00002+K00006+K00006+K00006+K00013+K00015+K00016+K00016+K00021+K00021+K00021+K00021+K00021+K00021+K00021+K00021+K00021+K00021+K00021+…		Linoleic acid metabolism	ko00591	83 out of 6519 1.2732014112594%	325 out of 58977 0.551062278515353%	0	0	Cluster-44281.122255;Cluster-44281.28351;Cluster-44281.30362;Cluster-44281.39569;Cluster-44281.48513;Cluster-44281.55559;Cluster-44281.57697;Cluster-44281.63446;Cluster-44281.64683;Cluster-44281.66660;Cluster-44281.73519;Cluster-44281.74378;Cluster-44281.74379;Cluster-44281.74381;Cluster-44281.74386;Cluster-44281.80561;Cluster-44281.143514;Cluster-44281.54245;Cluster-44281.72446;Cluster-44281.801…	K00454+K00454+K00454+K00454+K00454+K00454+K00454+K00454+K00454+K00454+K00454+K00454+K00454+K00454+K00454+K00454+K01047+K01047+K01047+K01047+K01047+K07409+K07424+K07424+K07424+K14674+K14674+K15718+K15718+K15718+K15718+K15718+K15718+K15718+K15718+K15718+K15718+K15718+K15718+K15718+K15718+K15718+K15718+K15718+K15718+K15718+K15718+K15718+K15718+K15718+K15718+K15718+K15718+K15718+K15718+K15718+K15718+…
Phenylpropanoid biosynthesis	ko00940	179 out of 3435 5.21106259097525%	1611 out of 58977 2.73157332519457%	3.88382e-11	5.16547e-09	Cluster-44281.27736;Cluster-44281.62347;Cluster-44281.62348;Cluster-44281.68522;Cluster-44281.80958;Cluster-32323.0;Cluster-43777.0;Cluster-44281.131244;Cluster-44281.149683;Cluster-44281.21103;Cluster-44281.35339;Cluster-44281.41359;Cluster-44281.41612;Cluster-44281.46767;Cluster-44281.46866;Cluster-44281.47921;Cluster-44281.52720;Cluster-44281.54154;Cluster-44281.63963;Cluster-44281.68997;Clust…	K00083+K00083+K00083+K00083+K00083+K00430+K00430+K00430+K00430+K00430+K00430+K00430+K00430+K00430+K00430+K00430+K00430+K00430+K00430+K00430+K00430+K00430+K00430+K00430+K00430+K00430+K00430+K00430+K00430+K00430+K00430+K00430+K00430+K00430+K00430+K00430+K00430+K00588+K00588+K00588+K01188+K01188+K01188+K01188+K01188+K01188+K01188+K01188+K01188+K01188+K01904+K01904+K01904+K01904+K01904+K01904+K01904+…		alpha-Linolenic acid metabolism	ko00592	157 out of 8252 1.90256907416384%	619 out of 58977 1.04956169354155%	0	0	Cluster-44281.112041;Cluster-44281.131306;Cluster-44281.38775;Cluster-44281.57487;Cluster-44281.73438;Cluster-44281.79008;Cluster-44281.122255;Cluster-44281.24565;Cluster-44281.30362;Cluster-44281.48513;Cluster-44281.57697;Cluster-44281.64683;Cluster-44281.73519;Cluster-44281.74379;Cluster-44281.74381;Cluster-44281.80561;Cluster-44281.22665;Cluster-44281.54245;Cluster-44281.71796;Cluster-44281.89…	K00232+K00232+K00232+K00232+K00232+K00232+K00454+K00454+K00454+K00454+K00454+K00454+K00454+K00454+K00454+K00454+K01047+K01047+K01047+K01047+K01047+K01047+K01723+K01723+K01723+K01723+K01723+K01723+K01723+K01723+K01723+K01723+K01723+K01723+K01723+K01723+K01723+K01723+K01723+K01723+K01723+K01723+K01723+K01723+K01723+K01723+K01723+K05894+K05894+K05894+K05894+K05894+K05894+K05894+K05894+K05894+K05894+…		alpha-Linolenic acid metabolism	ko00592	132 out of 6519 2.02485043718362%	619 out of 58977 1.04956169354155%	0	0	Cluster-44281.73438;Cluster-44281.79008;Cluster-44281.122255;Cluster-44281.28351;Cluster-44281.30362;Cluster-44281.39569;Cluster-44281.48513;Cluster-44281.55559;Cluster-44281.57697;Cluster-44281.63446;Cluster-44281.64683;Cluster-44281.66660;Cluster-44281.73519;Cluster-44281.74378;Cluster-44281.74379;Cluster-44281.74381;Cluster-44281.74386;Cluster-44281.80561;Cluster-44281.143514;Cluster-44281.542…	K00232+K00232+K00454+K00454+K00454+K00454+K00454+K00454+K00454+K00454+K00454+K00454+K00454+K00454+K00454+K00454+K00454+K00454+K01047+K01047+K01047+K01047+K01047+K01723+K01723+K01723+K01723+K01723+K01723+K01723+K01723+K01723+K01723+K01723+K01723+K01723+K01723+K01723+K01723+K01723+K01723+K01723+K01723+K01723+K01723+K01723+K05894+K05894+K05894+K05894+K05894+K05894+K05894+K05894+K05894+K05894+K05894+…
Plant-pathogen interaction	ko04626	282 out of 3435 8.20960698689956%	2765 out of 58977 4.68826830798447%	1.80466e-10	2.40019e-08	Cluster-44281.102131;Cluster-44281.107025;Cluster-44281.144837;Cluster-44281.65551;Cluster-44281.71964;Cluster-44281.86264;Cluster-48811.0;Cluster-44281.100398;Cluster-44281.138198;Cluster-44281.138216;Cluster-44281.138233;Cluster-44281.79826;Cluster-44281.83514;Cluster-44281.84985;Cluster-75474.0;Cluster-75474.1;Cluster-44281.83553;Cluster-67488.0;Cluster-44281.86649;Cluster-44281.42398;Cluster-…	K02183+K02183+K02183+K02183+K02183+K02183+K02183+K04079+K04079+K04079+K04079+K04079+K04079+K04079+K04079+K04079+K04368+K05391+K09487+K12795+K12795+K12795+K13412+K13412+K13412+K13412+K13412+K13412+K13412+K13412+K13412+K13413+K13414+K13414+K13414+K13414+K13414+K13414+K13414+K13414+K13414+K13414+K13414+K13414+K13416+K13420+K13420+K13420+K13420+K13420+K13420+K13420+K13420+K13420+K13420+K13420+K13420+…		Plant hormone signal transduction	ko04075	365 out of 8252 4.42317014057198%	1688 out of 58977 2.86213269579667%	0	0	Cluster-44281.107471;Cluster-44281.114629;Cluster-44281.125391;Cluster-44281.125392;Cluster-44281.149242;Cluster-44281.40897;Cluster-44281.45442;Cluster-44281.53432;Cluster-44281.58599;Cluster-44281.63336;Cluster-44281.92136;Cluster-44281.71253;Cluster-44281.106155;Cluster-44281.1174;Cluster-44281.133590;Cluster-44281.19425;Cluster-44281.27695;Cluster-44281.46986;Cluster-44281.48116;Cluster-44281…	K12126+K12126+K12126+K12126+K12126+K12126+K12126+K12126+K12126+K12126+K12126+K13413+K13415+K13415+K13415+K13415+K13415+K13415+K13415+K13415+K13415+K13415+K13415+K13415+K13415+K13415+K13415+K13415+K13415+K13415+K13415+K13415+K13415+K13415+K13415+K13415+K13415+K13415+K13415+K13416+K13422+K13422+K13422+K13422+K13422+K13422+K13422+K13422+K13422+K13422+K13422+K13422+K13422+K13422+K13422+K13422+K13422+…		Brassinosteroid biosynthesis	ko00905	66 out of 6519 1.01242521859181%	244 out of 58977 0.413720602946911%	2.56306e-12	3.51139e-10	Cluster-44281.107561;Cluster-44281.32545;Cluster-44281.47271;Cluster-44281.49063;Cluster-44281.58214;Cluster-44281.59655;Cluster-44281.70227;Cluster-44281.70997;Cluster-44281.80699;Cluster-44281.80701;Cluster-44281.88820;Cluster-44281.88822;Cluster-44281.88824;Cluster-44281.96810;Cluster-44281.108656;Cluster-44281.40412;Cluster-44281.49425;Cluster-44281.66293;Cluster-44281.94012;Cluster-44281.986…	K09587+K09587+K09587+K09587+K09587+K09587+K09587+K09587+K09587+K09587+K09587+K09587+K09587+K09587+K09588+K09588+K09588+K09588+K09588+K09588+K09589+K09589+K12637+K12638+K12638+K12638+K12638+K12638+K12639+K12639+K12639+K12639+K12639+K12639+K12639+K12639+K12639+K12639+K12639+K15639+K15639+K15639+K15639+K15639+K15639+K15639+K15639+K15639+K15639+K15639+K15639+K15639+K15639+K15639+K15639+K15639+K15639+…
MAPK signaling pathway - plant	ko04016	186 out of 3435 5.41484716157205%	2049 out of 58977 3.47423571900911%	1.62916e-09	2.16678e-07	Cluster-25816.0;Cluster-44281.125685;Cluster-44281.93210;Cluster-44281.102131;Cluster-44281.107025;Cluster-44281.144837;Cluster-44281.65551;Cluster-44281.71964;Cluster-44281.86264;Cluster-48811.0;Cluster-44281.147315;Cluster-81135.2;Cluster-44281.71253;Cluster-44281.105778;Cluster-44281.110980;Cluster-44281.148221;Cluster-44281.19541;Cluster-44281.31538;Cluster-44281.32881;Cluster-44281.51184;Clu…	K00940+K00940+K00940+K02183+K02183+K02183+K02183+K02183+K02183+K02183+K03781+K03781+K13413+K13414+K13414+K13414+K13414+K13414+K13414+K13414+K13414+K13414+K13414+K13414+K13414+K13416+K13420+K13420+K13420+K13420+K13420+K13420+K13420+K13420+K13420+K13420+K13420+K13420+K13420+K13420+K13420+K13420+K13420+K13420+K13420+K13420+K13420+K13420+K13420+K13420+K13420+K13420+K13420+K13420+K13420+K13420+K13420+…		Phenylpropanoid biosynthesis	ko00940	348 out of 8252 4.21715947649055%	1611 out of 58977 2.73157332519457%	2.84173e-12	3.92158e-10	Cluster-44281.27734;Cluster-44281.36102;Cluster-44281.62347;Cluster-44281.62348;Cluster-44281.64204;Cluster-44281.68522;Cluster-44281.97500;Cluster-17490.0;Cluster-32323.0;Cluster-43777.0;Cluster-44170.0;Cluster-44281.100946;Cluster-44281.100947;Cluster-44281.103406;Cluster-44281.103414;Cluster-44281.103522;Cluster-44281.103835;Cluster-44281.105359;Cluster-44281.106219;Cluster-44281.106224;Cluste…	K00083+K00083+K00083+K00083+K00083+K00083+K00083+K00430+K00430+K00430+K00430+K00430+K00430+K00430+K00430+K00430+K00430+K00430+K00430+K00430+K00430+K00430+K00430+K00430+K00430+K00430+K00430+K00430+K00430+K00430+K00430+K00430+K00430+K00430+K00430+K00430+K00430+K00430+K00430+K00430+K00430+K00430+K00430+K00430+K00430+K00430+K00430+K00430+K00430+K00430+K00430+K00430+K00430+K00430+K00430+K00430+K00430+…		Plant hormone signal transduction	ko04075	312 out of 6519 4.78601012425219%	1688 out of 58977 2.86213269579667%	1.88454e-11	2.58182e-09	Cluster-44281.107472;Cluster-44281.107649;Cluster-44281.114629;Cluster-44281.149242;Cluster-44281.40897;Cluster-44281.45442;Cluster-44281.58598;Cluster-44281.58599;Cluster-44281.63336;Cluster-27752.1;Cluster-27752.2;Cluster-44281.1174;Cluster-44281.133590;Cluster-44281.27695;Cluster-44281.46986;Cluster-44281.48115;Cluster-44281.48116;Cluster-44281.53223;Cluster-44281.54533;Cluster-44281.55348;Clu…	K12126+K12126+K12126+K12126+K12126+K12126+K12126+K12126+K12126+K13415+K13415+K13415+K13415+K13415+K13415+K13415+K13415+K13415+K13415+K13415+K13415+K13415+K13415+K13415+K13415+K13415+K13415+K13415+K13415+K13415+K13415+K13415+K13415+K13415+K13415+K13415+K13416+K13416+K13416+K13422+K13422+K13422+K13422+K13422+K13422+K13422+K13422+K13422+K13422+K13422+K13422+K13422+K13422+K13422+K13422+K13422+K13422+…
Biosynthesis of secondary metabolites	ko01110	892 out of 3435 25.9679767103348%	13139 out of 58977 22.2781762381946%	7.73334e-08	1.02853e-05	Cluster-56640.0;Cluster-896.0;Cluster-43949.0;Cluster-44281.103806;Cluster-44281.114892;Cluster-44281.127053;Cluster-44281.130302;Cluster-44281.19089;Cluster-44281.337;Cluster-44281.75051;Cluster-44281.76587;Cluster-44281.54121;Cluster-3378.0;Cluster-44281.149315;Cluster-44281.64417;Cluster-44281.67513;Cluster-33770.0;Cluster-44281.102708;Cluster-44281.142163;Cluster-14746.0;Cluster-44281.106439;…	K00001+K00001+K00002+K00002+K00002+K00002+K00002+K00002+K00002+K00002+K00002+K00013+K00015+K00015+K00016+K00016+K00021+K00025+K00025+K00026+K00026+K00026+K00026+K00026+K00026+K00030+K00030+K00030+K00030+K00030+K00031+K00031+K00031+K00031+K00031+K00033+K00033+K00033+K00036+K00036+K00052+K00053+K00083+K00083+K00083+K00083+K00083+K00099+K00111+K00121+K00121+K00121+K00121+K00128+K00128+K00128+K00128+…		MAPK signaling pathway - plant	ko04016	432 out of 8252 5.23509452253999%	2049 out of 58977 3.47423571900911%	7.76817e-11	1.07201e-08	Cluster-25816.0;Cluster-44281.53119;Cluster-44281.65516;Cluster-44281.76424;Cluster-44281.95122;Cluster-44281.99541;Cluster-44281.100598;Cluster-44281.107025;Cluster-44281.124766;Cluster-44281.128701;Cluster-44281.144590;Cluster-44281.144837;Cluster-44281.31456;Cluster-44281.35855;Cluster-44281.49825;Cluster-44281.56782;Cluster-44281.58114;Cluster-44281.60698;Cluster-44281.63487;Cluster-44281.655…	K00940+K00940+K00940+K00940+K00940+K00940+K02183+K02183+K02183+K02183+K02183+K02183+K02183+K02183+K02183+K02183+K02183+K02183+K02183+K02183+K02183+K02183+K02183+K02183+K02183+K02183+K02183+K02183+K02183+K02183+K02183+K02183+K03781+K03781+K03781+K03781+K03781+K03781+K03781+K03781+K03781+K03781+K03781+K13413+K13414+K13414+K13414+K13414+K13414+K13414+K13414+K13414+K13414+K13414+K13414+K13414+K13414+…		Phenylpropanoid biosynthesis	ko00940	331 out of 6519 5.07746586899831%	1611 out of 58977 2.73157332519457%	2.28889e-11	3.13578e-09	Cluster-44281.106193;Cluster-44281.27734;Cluster-44281.27736;Cluster-44281.62347;Cluster-44281.62348;Cluster-44281.64204;Cluster-44281.68522;Cluster-44281.80958;Cluster-17490.0;Cluster-44170.0;Cluster-44281.100946;Cluster-44281.100947;Cluster-44281.103406;Cluster-44281.103414;Cluster-44281.103522;Cluster-44281.103835;Cluster-44281.105359;Cluster-44281.106219;Cluster-44281.106224;Cluster-44281.108…	K00083+K00083+K00083+K00083+K00083+K00083+K00083+K00083+K00430+K00430+K00430+K00430+K00430+K00430+K00430+K00430+K00430+K00430+K00430+K00430+K00430+K00430+K00430+K00430+K00430+K00430+K00430+K00430+K00430+K00430+K00430+K00430+K00430+K00430+K00430+K00430+K00430+K00430+K00430+K00430+K00430+K00430+K00430+K00430+K00430+K00430+K00430+K00430+K00430+K00430+K00430+K00430+K00430+K00430+K00430+K00430+K00430+…
Photosynthesis	ko00195	38 out of 3435 1.10625909752547%	260 out of 58977 0.440849822812283%	1.81689e-07	2.41646e-05	Cluster-44281.74471;Cluster-44281.52478;Cluster-44281.72186;Cluster-44281.72155;Cluster-44281.130884;Cluster-44281.43396;Cluster-44281.61346;Cluster-44281.70979;Cluster-44281.51694;Cluster-44281.59247;Cluster-44281.70899;Cluster-44281.72670;Cluster-44281.77632;Cluster-44281.99944;Cluster-44281.97719;Cluster-44281.64017;Cluster-44281.66921;Cluster-44281.85925;Cluster-44281.55971;Cluster-44281.8154…	K02109+K02115+K02115+K02636+K02638+K02638+K02638+K02638+K02639+K02639+K02639+K02639+K02639+K02639+K02641+K02693+K02694+K02694+K02698+K02699+K02701+K02703+K02703+K02716+K02717+K02717+K02721+K02721+K02723+K03541+K03541+K03542+K08901+K08901+K08905+K08905+K08906+K14332		Plant-pathogen interaction	ko04626	566 out of 8252 6.85894328647601%	2765 out of 58977 4.68826830798447%	1.63998e-10	2.26317e-08	Cluster-44281.45095;Cluster-44281.98094;Cluster-54511.0;Cluster-44281.100598;Cluster-44281.107025;Cluster-44281.124766;Cluster-44281.128701;Cluster-44281.144590;Cluster-44281.144837;Cluster-44281.31456;Cluster-44281.35855;Cluster-44281.49825;Cluster-44281.56782;Cluster-44281.58114;Cluster-44281.60698;Cluster-44281.63487;Cluster-44281.65551;Cluster-44281.66748;Cluster-44281.68677;Cluster-44281.704…	K00864+K00864+K00864+K02183+K02183+K02183+K02183+K02183+K02183+K02183+K02183+K02183+K02183+K02183+K02183+K02183+K02183+K02183+K02183+K02183+K02183+K02183+K02183+K02183+K02183+K02183+K02183+K02183+K02183+K04079+K04079+K04079+K04079+K04079+K04079+K04079+K04079+K04079+K04079+K04079+K04079+K04079+K04079+K04079+K04079+K04079+K04079+K04079+K04079+K04079+K04368+K04368+K05391+K05391+K05391+K05391+K05391+…		MAPK signaling pathway - plant	ko04016	410 out of 6519 6.28930817610063%	2049 out of 58977 3.47423571900911%	5.33136e-11	7.30396e-09	Cluster-25816.0;Cluster-44281.53119;Cluster-44281.65516;Cluster-44281.76424;Cluster-44281.95122;Cluster-44281.99541;Cluster-44281.100598;Cluster-44281.144590;Cluster-44281.145986;Cluster-44281.31456;Cluster-44281.35843;Cluster-44281.35855;Cluster-44281.49825;Cluster-44281.60564;Cluster-44281.63487;Cluster-44281.65551;Cluster-44281.66748;Cluster-44281.68677;Cluster-44281.70474;Cluster-44281.72833;…	K00940+K00940+K00940+K00940+K00940+K00940+K02183+K02183+K02183+K02183+K02183+K02183+K02183+K02183+K02183+K02183+K02183+K02183+K02183+K02183+K02183+K02183+K02183+K02183+K02183+K02183+K02183+K02183+K02183+K03781+K03781+K03781+K03781+K03781+K03781+K03781+K03781+K03781+K13414+K13414+K13414+K13414+K13414+K13414+K13414+K13414+K13414+K13414+K13414+K13414+K13414+K13414+K13414+K13414+K13414+K13414+K13414+…
Flavonoid biosynthesis	ko00941	55 out of 3435 1.60116448326055%	502 out of 58977 0.851179273276023%	6.07418e-06	0.000807866	Cluster-44281.142231;Cluster-44281.72239;Cluster-44281.83016;Cluster-44281.73529;Cluster-44281.75508;Cluster-44281.75509;Cluster-44281.101719;Cluster-44281.55643;Cluster-44281.61553;Cluster-44281.62945;Cluster-44281.87201;Cluster-44281.86730;Cluster-44281.105148;Cluster-44281.109630;Cluster-44281.114533;Cluster-44281.115911;Cluster-44281.20840;Cluster-44281.105151;Cluster-44281.148177;Cluster-442…	K00475+K00475+K00475+K00588+K00588+K00588+K00660+K00660+K00660+K00660+K00660+K01859+K05277+K05277+K05277+K05277+K05277+K05278+K05278+K05278+K05278+K05278+K05278+K05278+K05278+K05278+K05278+K05280+K05280+K09754+K09754+K09754+K13065+K13065+K13065+K13065+K13065+K13065+K13065+K13065+K13065+K13065+K13065+K13081+K13081+K13082+K13082+K13082+K13082+K13082+K13083+K13083+K13083+K13083+K22845		Starch and sucrose metabolism	ko00500	372 out of 8252 4.5079980610761%	1974 out of 58977 3.34706750089018%	8.17362e-10	1.12796e-07	Cluster-44281.24743;Cluster-44281.27966;Cluster-44281.40301;Cluster-44281.58341;Cluster-44281.58987;Cluster-44281.58988;Cluster-44281.58990;Cluster-44281.64104;Cluster-44281.70479;Cluster-44281.71883;Cluster-44281.72284;Cluster-44281.75407;Cluster-44281.77343;Cluster-44281.83288;Cluster-44281.97630;Cluster-44281.98106;Cluster-17271.0;Cluster-64018.0;Cluster-44281.117943;Cluster-44281.44268;Cluste…	K00688+K00688+K00688+K00688+K00688+K00688+K00688+K00688+K00688+K00688+K00688+K00688+K00688+K00688+K00688+K00688+K00693+K00693+K00695+K00695+K00695+K00695+K00695+K00695+K00695+K00695+K00695+K00696+K00696+K00696+K00696+K00696+K00700+K00700+K00700+K00700+K00700+K00700+K00700+K00700+K00703+K00703+K00703+K00703+K00703+K00703+K00703+K00703+K00703+K00705+K00705+K00705+K00705+K00705+K00705+K00705+K00705+…		Plant-pathogen interaction	ko04626	531 out of 6519 8.14542107685228%	2765 out of 58977 4.68826830798447%	6.15274e-11	8.42926e-09	Cluster-44281.100598;Cluster-44281.144590;Cluster-44281.145986;Cluster-44281.31456;Cluster-44281.35843;Cluster-44281.35855;Cluster-44281.49825;Cluster-44281.60564;Cluster-44281.63487;Cluster-44281.65551;Cluster-44281.66748;Cluster-44281.68677;Cluster-44281.70474;Cluster-44281.72833;Cluster-44281.79355;Cluster-44281.80173;Cluster-44281.80291;Cluster-44281.83386;Cluster-44281.83641;Cluster-44281.93…	K02183+K02183+K02183+K02183+K02183+K02183+K02183+K02183+K02183+K02183+K02183+K02183+K02183+K02183+K02183+K02183+K02183+K02183+K02183+K02183+K02183+K02183+K02183+K04079+K04079+K04079+K04079+K04079+K04079+K04079+K04079+K09487+K09487+K09487+K12795+K13412+K13412+K13412+K13412+K13412+K13412+K13412+K13412+K13412+K13412+K13412+K13412+K13412+K13412+K13412+K13412+K13412+K13412+K13412+K13412+K13412+K13414+…
Carotenoid biosynthesis	ko00906	40 out of 3435 1.16448326055313%	346 out of 58977 0.586669379588653%	3.18175e-05	0.00423173	Cluster-44281.139865;Cluster-44281.96822;Cluster-44281.57910;Cluster-44281.100610;Cluster-44281.54298;Cluster-44281.89891;Cluster-44281.105044;Cluster-44281.102961;Cluster-44281.11187;Cluster-44281.113990;Cluster-44281.133266;Cluster-44281.30033;Cluster-44281.30035;Cluster-44281.34354;Cluster-44281.44140;Cluster-44281.54195;Cluster-44281.97273;Cluster-44281.106928;Cluster-44281.109322;Cluster-442…	K02291+K02293+K06443+K06444+K06444+K06444+K09835+K09838+K09838+K09838+K09838+K09838+K09838+K09838+K09838+K09838+K09838+K09839+K09839+K09839+K09839+K09840+K09840+K09841+K09841+K09841+K09841+K09841+K09841+K09841+K09842+K09842+K09842+K09842+K09842+K09843+K09843+K09843+K09843+K09843		Metabolic pathways	ko01100	3927 out of 8252 47.5884634028114%	26269 out of 58977 44.5410922902148%	1.15269e-09	1.59072e-07	Cluster-44281.113887;Cluster-44281.115133;Cluster-44281.115134;Cluster-44281.140179;Cluster-56640.0;Cluster-896.0;Cluster-44281.101432;Cluster-44281.106550;Cluster-44281.106965;Cluster-44281.116006;Cluster-44281.122310;Cluster-44281.127884;Cluster-44281.128135;Cluster-44281.130302;Cluster-44281.19097;Cluster-44281.337;Cluster-44281.37743;Cluster-44281.41080;Cluster-44281.49449;Cluster-44281.50056…	K00001+K00001+K00001+K00001+K00001+K00001+K00002+K00002+K00002+K00002+K00002+K00002+K00002+K00002+K00002+K00002+K00002+K00002+K00002+K00002+K00002+K00002+K00002+K00002+K00002+K00002+K00002+K00002+K00002+K00002+K00002+K00002+K00002+K00002+K00002+K00002+K00002+K00002+K00002+K00008+K00008+K00008+K00008+K00008+K00008+K00008+K00008+K00008+K00008+K00008+K00008+K00008+K00009+K00009+K00009+K00010+K00010+…		Starch and sucrose metabolism	ko00500	322 out of 6519 4.93940788464488%	1974 out of 58977 3.34706750089018%	7.15885e-11	9.80763e-09	Cluster-44281.134567;Cluster-44281.24743;Cluster-44281.37949;Cluster-44281.58341;Cluster-44281.58988;Cluster-44281.58990;Cluster-44281.64104;Cluster-44281.71883;Cluster-44281.72284;Cluster-44281.75407;Cluster-44281.77343;Cluster-44281.83288;Cluster-44281.97630;Cluster-64018.0;Cluster-44281.136760;Cluster-44281.19559;Cluster-44281.39830;Cluster-44281.55454;Cluster-44281.55456;Cluster-44281.56578;C…	K00688+K00688+K00688+K00688+K00688+K00688+K00688+K00688+K00688+K00688+K00688+K00688+K00688+K00693+K00696+K00696+K00696+K00696+K00696+K00696+K00696+K00696+K00700+K00700+K00700+K00700+K00700+K00700+K00700+K00703+K00703+K00703+K00703+K00703+K00703+K00703+K00705+K00705+K00705+K00705+K00705+K00705+K00705+K00705+K00705+K00705+K00705+K00750+K00844+K00844+K00844+K00844+K00844+K00847+K00847+K00847+K00847+…
Linoleic acid metabolism	ko00591	37 out of 3435 1.07714701601164%	325 out of 58977 0.551062278515353%	8.47713e-05	0.0112746	Cluster-44281.122255;Cluster-44281.28351;Cluster-44281.55559;Cluster-44281.143514;Cluster-44281.22665;Cluster-44281.72446;Cluster-44281.39661;Cluster-64817.0;Cluster-44281.142059;Cluster-63980.0;Cluster-24277.0;Cluster-44281.106214;Cluster-44281.119898;Cluster-44281.121170;Cluster-44281.131160;Cluster-44281.137402;Cluster-44281.139235;Cluster-44281.15110;Cluster-44281.19454;Cluster-44281.20058;Cl…	K00454+K00454+K00454+K01047+K01047+K01047+K07409+K07409+K07424+K07424+K15718+K15718+K15718+K15718+K15718+K15718+K15718+K15718+K15718+K15718+K15718+K15718+K15718+K15718+K15718+K15718+K15718+K15718+K15718+K15718+K15718+K15718+K15718+K15718+K15718+K15718+K16817		Monoterpenoid biosynthesis	ko00902	76 out of 8252 0.920988851187591%	275 out of 58977 0.466283466436068%	2.4128e-09	3.32967e-07	Cluster-44281.105210;Cluster-44281.111041;Cluster-44281.25303;Cluster-44281.34126;Cluster-44281.134374;Cluster-44281.135514;Cluster-44281.135515;Cluster-44281.136764;Cluster-44281.140123;Cluster-44281.19823;Cluster-44281.27073;Cluster-44281.5695;Cluster-44281.74751;Cluster-44281.74752;Cluster-44281.78232;Cluster-44281.120952;Cluster-44281.36861;Cluster-44281.132954;Cluster-44281.52004;Cluster-411…	K07385+K07385+K07385+K07385+K15095+K15095+K15095+K15095+K15095+K15095+K15095+K15095+K15095+K15095+K15095+K18108+K18108+K20618+K20979+K21373+K21373+K21373+K21373+K21374+K21374+K21374+K21374+K21374+K21374+K21374+K21374+K21374+K21374+K21374+K21374+K21374+K21374+K21374+K21374+K21374+K21374+K21374+K21374+K21374+K21374+K21374+K21374+K21374+K21374+K21374+K21374+K21374+K21374+K21374+K21374+K21374+K21374+…		Biosynthesis of secondary metabolites	ko01110	1781 out of 6519 27.3201411259396%	13139 out of 58977 22.2781762381946%	2.04446e-10	2.80091e-08	Cluster-44281.115133;Cluster-44281.115134;Cluster-56640.0;Cluster-43949.0;Cluster-44281.101432;Cluster-44281.103806;Cluster-44281.106550;Cluster-44281.116006;Cluster-44281.127884;Cluster-44281.128135;Cluster-44281.128944;Cluster-44281.19089;Cluster-44281.337;Cluster-44281.37742;Cluster-44281.37743;Cluster-44281.43076;Cluster-44281.50056;Cluster-44281.52902;Cluster-44281.58274;Cluster-44281.66130;…	K00001+K00001+K00001+K00002+K00002+K00002+K00002+K00002+K00002+K00002+K00002+K00002+K00002+K00002+K00002+K00002+K00002+K00002+K00002+K00002+K00002+K00002+K00002+K00002+K00002+K00002+K00002+K00002+K00015+K00016+K00016+K00016+K00021+K00021+K00021+K00021+K00021+K00021+K00025+K00025+K00025+K00025+K00025+K00025+K00025+K00025+K00026+K00026+K00026+K00026+K00026+K00026+K00026+K00026+K00026+K00030+K00030+…
Zeatin biosynthesis	ko00908	21 out of 3435 0.611353711790393%	150 out of 58977 0.254336436237855%	0.000173608	0.0230898	Cluster-44281.134959;Cluster-44281.2414;Cluster-44281.24711;Cluster-44281.39577;Cluster-44281.100292;Cluster-44281.115282;Cluster-44281.118075;Cluster-44281.121578;Cluster-44281.22293;Cluster-44281.22818;Cluster-44281.25360;Cluster-44281.37421;Cluster-44281.71108;Cluster-44281.42017;Cluster-44281.44329;Cluster-44281.66032;Cluster-44281.77514;Cluster-44281.77515;Cluster-44281.77516;Cluster-44281.7…	K10717+K10717+K10717+K10717+K13495+K13495+K13495+K13495+K13495+K13495+K13495+K13495+K13495+K13496+K13496+K13496+K13496+K13496+K13496+K13496+K13496		Pentose and glucuronate interconversions	ko00040	224 out of 8252 2.71449345613185%	1154 out of 58977 1.9566949827899%	1.83006e-07	2.52548e-05	Cluster-44281.101432;Cluster-44281.106550;Cluster-44281.106965;Cluster-44281.116006;Cluster-44281.122310;Cluster-44281.127884;Cluster-44281.128135;Cluster-44281.130302;Cluster-44281.19097;Cluster-44281.337;Cluster-44281.37743;Cluster-44281.41080;Cluster-44281.49449;Cluster-44281.50056;Cluster-44281.51626;Cluster-44281.52902;Cluster-44281.58273;Cluster-44281.58274;Cluster-44281.66130;Cluster-44281…	K00002+K00002+K00002+K00002+K00002+K00002+K00002+K00002+K00002+K00002+K00002+K00002+K00002+K00002+K00002+K00002+K00002+K00002+K00002+K00002+K00002+K00002+K00002+K00002+K00002+K00002+K00002+K00002+K00002+K00002+K00002+K00002+K00002+K00008+K00008+K00008+K00008+K00008+K00008+K00008+K00008+K00008+K00008+K00008+K00008+K00008+K00011+K00012+K00012+K00012+K00065+K00854+K00854+K00854+K00854+K00854+K00875+…		Metabolic pathways	ko01100	3133 out of 6519 48.0595183310324%	26269 out of 58977 44.5410922902148%	8.7566e-10	1.19965e-07	Cluster-44281.115133;Cluster-44281.115134;Cluster-56640.0;Cluster-43949.0;Cluster-44281.101432;Cluster-44281.103806;Cluster-44281.106550;Cluster-44281.116006;Cluster-44281.127884;Cluster-44281.128135;Cluster-44281.128944;Cluster-44281.19089;Cluster-44281.337;Cluster-44281.37742;Cluster-44281.37743;Cluster-44281.43076;Cluster-44281.50056;Cluster-44281.52902;Cluster-44281.58274;Cluster-44281.66130;…	K00001+K00001+K00001+K00002+K00002+K00002+K00002+K00002+K00002+K00002+K00002+K00002+K00002+K00002+K00002+K00002+K00002+K00002+K00002+K00002+K00002+K00002+K00002+K00002+K00002+K00002+K00002+K00002+K00008+K00008+K00008+K00008+K00008+K00008+K00008+K00009+K00009+K00010+K00010+K00010+K00010+K00010+K00010+K00010+K00012+K00012+K00012+K00012+K00015+K00016+K00016+K00016+K00020+K00020+K00020+K00020+K00020+…
Plant hormone signal transduction	ko04075	131 out of 3435 3.8136826783115%	1688 out of 58977 2.86213269579667%	0.000558936	0.0743385	Cluster-44281.125391;Cluster-44281.45442;Cluster-44281.71253;Cluster-27752.1;Cluster-44281.106155;Cluster-44281.19425;Cluster-44281.48115;Cluster-44281.60725;Cluster-44281.64890;Cluster-44281.81363;Cluster-44281.89573;Cluster-44281.35174;Cluster-32096.0;Cluster-44281.120630;Cluster-44281.123452;Cluster-44281.34691;Cluster-44281.59343;Cluster-44281.65534;Cluster-44281.69738;Cluster-44281.85598;Clu…	K12126+K12126+K13413+K13415+K13415+K13415+K13415+K13415+K13415+K13415+K13415+K13416+K13422+K13422+K13422+K13422+K13422+K13422+K13422+K13422+K13422+K13422+K13449+K13449+K13449+K13463+K13463+K13463+K13464+K13464+K13464+K13464+K13464+K13464+K13464+K13464+K13464+K13464+K13464+K13946+K13946+K13946+K14431+K14431+K14431+K14432+K14484+K14484+K14484+K14484+K14484+K14486+K14486+K14486+K14486+K14486+K14486+…		Linoleic acid metabolism	ko00591	76 out of 8252 0.920988851187591%	325 out of 58977 0.551062278515353%	3.62014e-06	0.000499579	Cluster-44281.122255;Cluster-44281.24565;Cluster-44281.30362;Cluster-44281.48513;Cluster-44281.57697;Cluster-44281.64683;Cluster-44281.73519;Cluster-44281.74379;Cluster-44281.74381;Cluster-44281.80561;Cluster-44281.22665;Cluster-44281.54245;Cluster-44281.71796;Cluster-44281.89023;Cluster-44281.9000;Cluster-44281.95239;Cluster-64817.0;Cluster-44281.104317;Cluster-44281.142059;Cluster-44281.36493;C…	K00454+K00454+K00454+K00454+K00454+K00454+K00454+K00454+K00454+K00454+K01047+K01047+K01047+K01047+K01047+K01047+K07409+K07424+K07424+K07424+K07424+K15718+K15718+K15718+K15718+K15718+K15718+K15718+K15718+K15718+K15718+K15718+K15718+K15718+K15718+K15718+K15718+K15718+K15718+K15718+K15718+K15718+K15718+K15718+K15718+K15718+K15718+K15718+K15718+K15718+K15718+K15718+K15718+K15718+K15718+K15718+K15718+…		Terpenoid backbone biosynthesis	ko00900	100 out of 6519 1.53397760392698%	594 out of 58977 1.00717228750191%	1.37536e-05	0.00188425	Cluster-44281.102275;Cluster-44281.124346;Cluster-44281.128191;Cluster-44281.16544;Cluster-44281.57570;Cluster-44281.75476;Cluster-44281.83547;Cluster-44281.149404;Cluster-44281.31393;Cluster-44281.68914;Cluster-25224.4;Cluster-44281.400;Cluster-44281.49295;Cluster-44281.50546;Cluster-44281.129842;Cluster-44281.57334;Cluster-44281.60689;Cluster-44281.62455;Cluster-44281.69905;Cluster-44281.69906;…	K00021+K00021+K00021+K00021+K00021+K00021+K00626+K00869+K00869+K00991+K01641+K01641+K01641+K01641+K01662+K01662+K01662+K01662+K01662+K01662+K01662+K01662+K01823+K01823+K03527+K03527+K03527+K06013+K08658+K11778+K11778+K11778+K12742+K12742+K12742+K12742+K12742+K12742+K12742+K12742+K12742+K12742+K12742+K12742+K12742+K12742+K12742+K12742+K12742+K12742+K12742+K12742+K12742+K12742+K12742+K12742+K12742+…
Stilbenoid, diarylheptanoid and gingerol biosynthesis	ko00945	17 out of 3435 0.49490538573508%	129 out of 58977 0.218729335164556%	0.00137052	0.182279	Cluster-44281.73529;Cluster-44281.75508;Cluster-44281.75509;Cluster-44281.23083;Cluster-44281.72193;Cluster-44281.72734;Cluster-44281.122233;Cluster-44281.122234;Cluster-44281.122237;Cluster-44281.122238;Cluster-44281.122241;Cluster-44281.122242;Cluster-44281.122244;Cluster-44281.141699;Cluster-44281.30462;Cluster-44281.84047;Cluster-77189.0	K00588+K00588+K00588+K09754+K09754+K09754+K13065+K13065+K13065+K13065+K13065+K13065+K13065+K13065+K13065+K13065+K13065		Brassinosteroid biosynthesis	ko00905	58 out of 8252 0.702859912748425%	244 out of 58977 0.413720602946911%	2.90359e-05	0.00400696	Cluster-44281.32545;Cluster-44281.49063;Cluster-44281.58214;Cluster-44281.70997;Cluster-44281.88820;Cluster-44281.88821;Cluster-44281.88822;Cluster-44281.88824;Cluster-44281.96810;Cluster-44281.108656;Cluster-44281.40412;Cluster-44281.49425;Cluster-44281.66293;Cluster-44281.94012;Cluster-44281.92029;Cluster-44281.61679;Cluster-44281.11904;Cluster-44281.50894;Cluster-44281.84478;Cluster-44281.9058…	K09587+K09587+K09587+K09587+K09587+K09587+K09587+K09587+K09587+K09588+K09588+K09588+K09588+K09588+K09589+K12637+K12638+K12638+K12638+K12638+K12638+K12639+K12639+K12639+K12639+K12639+K12639+K12639+K12639+K12639+K15639+K15639+K15639+K15639+K15639+K15639+K15639+K15639+K15639+K15639+K15639+K15639+K15639+K15639+K15639+K15639+K15639+K15639+K15639+K20623+K20623+K20623+K20623+K20623+K20623+K20623+K20623+…		Circadian rhythm - plant	ko04712	71 out of 6519 1.08912409878816%	410 out of 58977 0.695186259050138%	9.28686e-05	0.012723	Cluster-44281.42636;Cluster-44281.48221;Cluster-44281.55643;Cluster-44281.87201;Cluster-21422.0;Cluster-44281.55953;Cluster-44281.58364;Cluster-44281.64398;Cluster-44281.66441;Cluster-44281.66479;Cluster-44281.80268;Cluster-59649.0;Cluster-44281.73300;Cluster-44281.28764;Cluster-44281.35371;Cluster-44281.85477;Cluster-44281.73936;Cluster-44281.81457;Cluster-44281.28028;Cluster-44281.73369;Cluster…	K00660+K00660+K00660+K00660+K03097+K03097+K03097+K03097+K03097+K03097+K03097+K03097+K03115+K10143+K10143+K10143+K12115+K12115+K12118+K12118+K12118+K12121+K12121+K12121+K12124+K12125+K12125+K12126+K12126+K12126+K12126+K12126+K12126+K12126+K12126+K12126+K12127+K12127+K12127+K12129+K12129+K12129+K12129+K12129+K12129+K12129+K12129+K12133+K12133+K12133+K12133+K12133+K12135+K12135+K12135+K12135+K12135+…
Ascorbate and aldarate metabolism	ko00053	51 out of 3435 1.48471615720524%	565 out of 58977 0.958000576495922%	0.00142758	0.189868	Cluster-44281.108052;Cluster-44281.131791;Cluster-44281.13406;Cluster-44281.28240;Cluster-44281.28242;Cluster-44281.28243;Cluster-44281.32468;Cluster-44281.42953;Cluster-44281.64927;Cluster-44281.65377;Cluster-44281.68930;Cluster-44281.80483;Cluster-44281.85086;Cluster-71163.0;Cluster-31771.0;Cluster-44281.129550;Cluster-44281.142295;Cluster-44281.24669;Cluster-44281.37314;Cluster-44281.56577;Clu…	K00103+K00103+K00103+K00103+K00103+K00103+K00103+K00103+K00103+K00103+K00103+K00103+K00103+K00103+K00128+K00128+K00128+K00128+K00128+K00128+K00128+K00225+K00225+K00423+K00423+K00423+K00423+K00423+K00423+K00423+K00434+K00434+K00434+K00434+K00469+K00469+K08232+K10046+K12447+K14085+K14085+K14085+K14085+K14085+K14190+K16190+K21888+K21888+K21888+K21888+K21888		Flavonoid biosynthesis	ko00941	100 out of 8252 1.21182743577315%	502 out of 58977 0.851179273276023%	0.000153109	0.021129	Cluster-44281.142231;Cluster-44281.49960;Cluster-44281.67635;Cluster-44281.83016;Cluster-44281.84518;Cluster-44281.89020;Cluster-44281.67456;Cluster-44281.71821;Cluster-44281.83522;Cluster-44281.34192;Cluster-44281.65880;Cluster-44281.73529;Cluster-44281.75509;Cluster-44281.105893;Cluster-44281.42635;Cluster-44281.42636;Cluster-44281.48221;Cluster-44281.62945;Cluster-44281.70904;Cluster-44281.838…	K00475+K00475+K00475+K00475+K00475+K00475+K00487+K00487+K00487+K00588+K00588+K00588+K00588+K00660+K00660+K00660+K00660+K00660+K00660+K00660+K00660+K01859+K01859+K01859+K01859+K01859+K01859+K01859+K01859+K05277+K05277+K05277+K05277+K05277+K05277+K05277+K05277+K05278+K05278+K05278+K05278+K05278+K05278+K05278+K05278+K05278+K05278+K05278+K05278+K05278+K05278+K05278+K05278+K05278+K05278+K05278+K05278+…		Galactose metabolism	ko00052	138 out of 6519 2.11688909341924%	913 out of 58977 1.54806110856775%	9.64791e-05	0.0132176	Cluster-44281.38779;Cluster-44281.41396;Cluster-44281.56088;Cluster-44281.92007;Cluster-62868.0;Cluster-44281.118402;Cluster-44281.28895;Cluster-44281.30021;Cluster-44281.41416;Cluster-44281.48007;Cluster-44281.53191;Cluster-44281.57013;Cluster-44281.58704;Cluster-44281.65713;Cluster-44281.65714;Cluster-44281.70620;Cluster-44281.79033;Cluster-44281.93351;Cluster-44281.98779;Cluster-44281.99135;Cl…	K00844+K00844+K00844+K00844+K00844+K00850+K00850+K00850+K00850+K00850+K00850+K00850+K00850+K00850+K00850+K00850+K00850+K00850+K00850+K00850+K00963+K00963+K00963+K00963+K00963+K00963+K00963+K00965+K00965+K01187+K01187+K01187+K01187+K01187+K01187+K01190+K01193+K01193+K01193+K01193+K01193+K01193+K01193+K01193+K01193+K01193+K01193+K01193+K01193+K01193+K01193+K01193+K01193+K01193+K01193+K01193+K01193+…
alpha-Linolenic acid metabolism	ko00592	54 out of 3435 1.57205240174672%	619 out of 58977 1.04956169354155%	0.00222368	0.295749	Cluster-44281.73438;Cluster-44281.122255;Cluster-44281.28351;Cluster-44281.55559;Cluster-44281.143514;Cluster-44281.22665;Cluster-44281.72446;Cluster-43659.0;Cluster-43659.1;Cluster-44281.40470;Cluster-44281.46130;Cluster-44281.65786;Cluster-44281.98335;Cluster-42008.1;Cluster-44281.103121;Cluster-44281.140223;Cluster-44281.149980;Cluster-44281.34981;Cluster-44281.52262;Cluster-44281.79529;Cluste…	K00232+K00454+K00454+K00454+K01047+K01047+K01047+K01723+K01723+K01723+K01723+K01723+K01723+K05894+K05894+K05894+K05894+K05894+K05894+K05894+K05894+K05894+K07513+K07513+K07513+K07513+K07513+K07513+K07513+K07513+K08241+K10526+K10526+K10526+K10526+K10526+K10526+K10527+K10527+K10527+K10527+K10527+K10529+K16817+K16818+K16818+K16818+K16818+K18857+K18857+K18857+K18857+K18857+K22389		Zeatin biosynthesis	ko00908	38 out of 8252 0.460494425593795%	150 out of 58977 0.254336436237855%	0.000161969	0.0223517	Cluster-40320.0;Cluster-40367.0;Cluster-44281.112796;Cluster-44281.33456;Cluster-44281.34873;Cluster-44281.145147;Cluster-44281.2414;Cluster-44281.24711;Cluster-44281.39398;Cluster-44281.39577;Cluster-44281.84450;Cluster-44281.115282;Cluster-44281.11619;Cluster-44281.118075;Cluster-44281.121578;Cluster-44281.22293;Cluster-44281.22818;Cluster-44281.25360;Cluster-44281.25797;Cluster-44281.28536;Clu…	K00279+K00279+K00279+K00279+K00279+K10717+K10717+K10717+K10717+K10717+K10717+K13495+K13495+K13495+K13495+K13495+K13495+K13495+K13495+K13495+K13495+K13495+K13495+K13496+K13496+K13496+K13496+K13496+K13496+K13496+K13496+K13496+K13496+K13496+K13496+K13496+K13496+K13496		Diterpenoid biosynthesis	ko00904	81 out of 6519 1.24252185918086%	486 out of 58977 0.824050053410652%	0.000119083	0.0163144	Cluster-44281.106449;Cluster-44281.116701;Cluster-44281.128617;Cluster-44281.137207;Cluster-44281.21206;Cluster-44281.28096;Cluster-44281.34589;Cluster-44281.38765;Cluster-44281.48135;Cluster-44281.52728;Cluster-44281.53524;Cluster-44281.65844;Cluster-44281.75397;Cluster-44281.78457;Cluster-44281.80134;Cluster-44281.81883;Cluster-44281.83657;Cluster-44281.84445;Cluster-44281.91023;Cluster-44281.9…	K04120+K04120+K04120+K04120+K04120+K04120+K04120+K04120+K04120+K04120+K04120+K04120+K04120+K04120+K04120+K04120+K04120+K04120+K04120+K04120+K04120+K04120+K04120+K04120+K04121+K04121+K04121+K04121+K04121+K04121+K04121+K04121+K04121+K04121+K04121+K04121+K04121+K04121+K04121+K04121+K04121+K04121+K04122+K04122+K04122+K04122+K04122+K04122+K04123+K04123+K04124+K04124+K04124+K04124+K04124+K04124+K04124+…
Pentose and glucuronate interconversions	ko00040	91 out of 3435 2.64919941775837%	1154 out of 58977 1.9566949827899%	0.00228724	0.304203	Cluster-43949.0;Cluster-44281.103806;Cluster-44281.114892;Cluster-44281.127053;Cluster-44281.130302;Cluster-44281.19089;Cluster-44281.337;Cluster-44281.75051;Cluster-44281.76587;Cluster-44281.121370;Cluster-44281.21609;Cluster-44281.22447;Cluster-44281.76776;Cluster-44281.76961;Cluster-44281.86490;Cluster-36152.0;Cluster-52546.0;Cluster-52546.2;Cluster-44281.129265;Cluster-44281.129266;Cluster-44…	K00002+K00002+K00002+K00002+K00002+K00002+K00002+K00002+K00002+K00008+K00008+K00008+K00008+K00008+K00008+K00854+K00854+K00854+K00963+K00963+K01051+K01051+K01051+K01051+K01051+K01051+K01051+K01051+K01051+K01051+K01051+K01051+K01051+K01051+K01051+K01051+K01051+K01051+K01051+K01051+K01051+K01051+K01051+K01051+K01051+K01051+K01051+K01051+K01184+K01184+K01184+K01184+K01184+K01184+K01184+K01184+K01184+…		Circadian rhythm - plant	ko04712	84 out of 8252 1.01793504604944%	410 out of 58977 0.695186259050138%	0.000191383	0.0264109	Cluster-44281.105893;Cluster-44281.42635;Cluster-44281.42636;Cluster-44281.48221;Cluster-44281.62945;Cluster-44281.70904;Cluster-44281.83870;Cluster-44281.87303;Cluster-21422.0;Cluster-44281.55953;Cluster-44281.58364;Cluster-44281.64398;Cluster-44281.66479;Cluster-44281.80268;Cluster-59649.0;Cluster-44281.76244;Cluster-44281.17271;Cluster-44281.28764;Cluster-44281.35371;Cluster-44281.85476;Cluste…	K00660+K00660+K00660+K00660+K00660+K00660+K00660+K00660+K03097+K03097+K03097+K03097+K03097+K03097+K03097+K03115+K10143+K10143+K10143+K10143+K10143+K12118+K12120+K12121+K12121+K12121+K12125+K12126+K12126+K12126+K12126+K12126+K12126+K12126+K12126+K12126+K12126+K12126+K12127+K12127+K12127+K12127+K12127+K12127+K12129+K12129+K12129+K12129+K12129+K12129+K12129+K12129+K12133+K12133+K12133+K12133+K12133+…		Cyanoamino acid metabolism	ko00460	104 out of 6519 1.59533670808406%	660 out of 58977 1.11908031944656%	0.000140546	0.0192549	Cluster-22889.0;Cluster-44281.107975;Cluster-44281.108023;Cluster-44281.126216;Cluster-44281.43802;Cluster-44281.66056;Cluster-44281.74676;Cluster-44281.80801;Cluster-44281.87708;Cluster-44281.88636;Cluster-44281.88637;Cluster-44281.89296;Cluster-44281.89325;Cluster-44281.93602;Cluster-44281.96177;Cluster-63550.1;Cluster-1166.0;Cluster-44281.105821;Cluster-44281.121890;Cluster-44281.121896;Cluste…	K00600+K00600+K00600+K00600+K00600+K00600+K00600+K00600+K00600+K00600+K00600+K00600+K00600+K00600+K00600+K00600+K01188+K01188+K01188+K01188+K01188+K01188+K01188+K01188+K01188+K01188+K01188+K01188+K01188+K01188+K01188+K01188+K01188+K01188+K01188+K01188+K01188+K01188+K01188+K01188+K01188+K01188+K01188+K01188+K01188+K01188+K01188+K01188+K01188+K01188+K01188+K01188+K01188+K01188+K01188+K01455+K05349+…
Photosynthesis - antenna proteins	ko00196	14 out of 3435 0.407569141193595%	104 out of 58977 0.176339929124913%	0.00286087	0.380496	Cluster-44281.85257;Cluster-44281.76113;Cluster-44281.80270;Cluster-44281.66671;Cluster-44281.81126;Cluster-44281.113941;Cluster-44281.70329;Cluster-44281.58894;Cluster-44281.65912;Cluster-44281.79903;Cluster-44281.76390;Cluster-44281.70642;Cluster-44281.70643;Cluster-44281.145326	K08907+K08908+K08909+K08910+K08910+K08911+K08912+K08913+K08915+K08915+K08916+K08917+K08917+K14172		Ascorbate and aldarate metabolism	ko00053	109 out of 8252 1.32089190499273%	565 out of 58977 0.958000576495922%	0.000288298	0.0397851	Cluster-44281.60270;Cluster-44281.66948;Cluster-44281.77261;Cluster-44281.103770;Cluster-44281.108052;Cluster-44281.108053;Cluster-44281.126483;Cluster-44281.130832;Cluster-44281.13406;Cluster-44281.28240;Cluster-44281.28241;Cluster-44281.28242;Cluster-44281.28243;Cluster-44281.28244;Cluster-44281.39244;Cluster-44281.42952;Cluster-44281.47976;Cluster-44281.58744;Cluster-44281.65377;Cluster-44281.…	K00012+K00012+K00012+K00103+K00103+K00103+K00103+K00103+K00103+K00103+K00103+K00103+K00103+K00103+K00103+K00103+K00103+K00103+K00103+K00103+K00103+K00128+K00128+K00128+K00128+K00128+K00128+K00128+K00128+K00128+K00128+K00128+K00128+K00128+K00128+K00128+K00128+K00128+K00128+K00128+K00128+K00128+K00225+K00225+K00423+K00423+K00423+K00423+K00423+K00423+K00423+K00423+K00423+K00423+K00423+K00423+K00423+…		Pentose and glucuronate interconversions	ko00040	166 out of 6519 2.54640282251879%	1154 out of 58977 1.9566949827899%	0.00025756	0.0352857	Cluster-43949.0;Cluster-44281.101432;Cluster-44281.103806;Cluster-44281.106550;Cluster-44281.116006;Cluster-44281.127884;Cluster-44281.128135;Cluster-44281.128944;Cluster-44281.19089;Cluster-44281.337;Cluster-44281.37742;Cluster-44281.37743;Cluster-44281.43076;Cluster-44281.50056;Cluster-44281.52902;Cluster-44281.58274;Cluster-44281.66130;Cluster-44281.75052;Cluster-44281.76156;Cluster-44281.7644…	K00002+K00002+K00002+K00002+K00002+K00002+K00002+K00002+K00002+K00002+K00002+K00002+K00002+K00002+K00002+K00002+K00002+K00002+K00002+K00002+K00002+K00002+K00002+K00002+K00002+K00008+K00008+K00008+K00008+K00008+K00008+K00008+K00012+K00012+K00012+K00012+K00854+K00854+K00854+K00963+K00963+K00963+K00963+K00963+K00963+K00963+K01051+K01051+K01051+K01051+K01051+K01051+K01051+K01051+K01051+K01051+K01051+…
Brassinosteroid biosynthesis	ko00905	25 out of 3435 0.727802037845706%	244 out of 58977 0.413720602946911%	0.00456796	0.607539	Cluster-44281.107561;Cluster-44281.70227;Cluster-44281.80699;Cluster-44281.80701;Cluster-44281.88820;Cluster-44281.40412;Cluster-44281.61679;Cluster-44281.11904;Cluster-44281.50894;Cluster-44281.77579;Cluster-44281.105616;Cluster-44281.140290;Cluster-44281.19985;Cluster-44281.19986;Cluster-44281.52913;Cluster-44281.62068;Cluster-44281.67614;Cluster-44281.80010;Cluster-40453.0;Cluster-40453.1;Clus…	K09587+K09587+K09587+K09587+K09587+K09588+K12637+K12638+K12638+K12639+K15639+K15639+K15639+K15639+K15639+K15639+K15639+K15639+K20623+K20623+K20623+K20623+K20623+K20623+K20623		Glycolysis / Gluconeogenesis	ko00010	310 out of 8252 3.75666505089675%	1857 out of 58977 3.14868508062465%	0.000477985	0.065962	Cluster-44281.113887;Cluster-44281.115133;Cluster-44281.115134;Cluster-44281.140179;Cluster-56640.0;Cluster-896.0;Cluster-44281.101432;Cluster-44281.106550;Cluster-44281.106965;Cluster-44281.116006;Cluster-44281.122310;Cluster-44281.127884;Cluster-44281.128135;Cluster-44281.130302;Cluster-44281.19097;Cluster-44281.337;Cluster-44281.37743;Cluster-44281.41080;Cluster-44281.49449;Cluster-44281.50056…	K00001+K00001+K00001+K00001+K00001+K00001+K00002+K00002+K00002+K00002+K00002+K00002+K00002+K00002+K00002+K00002+K00002+K00002+K00002+K00002+K00002+K00002+K00002+K00002+K00002+K00002+K00002+K00002+K00002+K00002+K00002+K00002+K00002+K00002+K00002+K00002+K00002+K00002+K00002+K00016+K00016+K00121+K00121+K00121+K00121+K00121+K00121+K00121+K00121+K00121+K00128+K00128+K00128+K00128+K00128+K00128+K00128+…		Zeatin biosynthesis	ko00908	31 out of 6519 0.475533057217365%	150 out of 58977 0.254336436237855%	0.000438013	0.0600077	Cluster-40367.0;Cluster-44281.33456;Cluster-44281.34873;Cluster-44281.24711;Cluster-44281.39398;Cluster-44281.84450;Cluster-44281.115282;Cluster-44281.22293;Cluster-44281.37421;Cluster-44281.40932;Cluster-44281.71108;Cluster-44281.90879;Cluster-47955.0;Cluster-44281.101961;Cluster-44281.117101;Cluster-44281.132387;Cluster-44281.135675;Cluster-44281.22870;Cluster-44281.42015;Cluster-44281.42017;Cl…	K00279+K00279+K00279+K10717+K10717+K10717+K13495+K13495+K13495+K13495+K13495+K13495+K13495+K13496+K13496+K13496+K13496+K13496+K13496+K13496+K13496+K13496+K13496+K13496+K13496+K13496+K13496+K13496+K13496+K13496+K13496
Riboflavin metabolism	ko00740	25 out of 3435 0.727802037845706%	248 out of 58977 0.420502907913254%	0.00561221	0.746424	Cluster-44281.110213;Cluster-44281.59125;Cluster-16986.0;Cluster-44281.53607;Cluster-44281.65487;Cluster-44281.127426;Cluster-44281.70000;Cluster-44281.101887;Cluster-44281.101888;Cluster-44281.106395;Cluster-44281.106398;Cluster-44281.111411;Cluster-44281.45940;Cluster-44281.55633;Cluster-44281.62831;Cluster-44281.121459;Cluster-44281.149762;Cluster-44281.14750;Cluster-44281.21554;Cluster-44281.…	K00794+K00794+K01513+K01513+K01513+K11752+K11752+K14379+K14379+K14379+K14379+K14379+K14379+K14379+K14379+K14652+K14652+K18453+K18453+K18453+K20884+K20884+K20884+K20884+K22912		Diterpenoid biosynthesis	ko00904	93 out of 8252 1.12699951526903%	486 out of 58977 0.824050053410652%	0.000992728	0.136996	Cluster-44281.106449;Cluster-44281.11369;Cluster-44281.124695;Cluster-44281.127810;Cluster-44281.21206;Cluster-44281.28081;Cluster-44281.28093;Cluster-44281.28096;Cluster-44281.34589;Cluster-44281.38765;Cluster-44281.43615;Cluster-44281.52728;Cluster-44281.53524;Cluster-44281.64392;Cluster-44281.65844;Cluster-44281.6976;Cluster-44281.75397;Cluster-44281.77081;Cluster-44281.78457;Cluster-44281.801…	K04120+K04120+K04120+K04120+K04120+K04120+K04120+K04120+K04120+K04120+K04120+K04120+K04120+K04120+K04120+K04120+K04120+K04120+K04120+K04120+K04120+K04120+K04120+K04120+K04120+K04120+K04120+K04120+K04120+K04121+K04121+K04121+K04121+K04121+K04121+K04121+K04121+K04121+K04121+K04121+K04121+K04121+K04121+K04121+K04121+K04122+K04122+K04122+K04123+K04124+K04124+K04124+K04124+K04124+K04124+K04124+K04124+…		Carotenoid biosynthesis	ko00906	59 out of 6519 0.90504678631692%	346 out of 58977 0.586669379588653%	0.000512449	0.0702055	Cluster-44281.23070;Cluster-44281.40793;Cluster-44281.30063;Cluster-44281.57910;Cluster-44281.102961;Cluster-44281.113990;Cluster-44281.27679;Cluster-44281.30033;Cluster-44281.44140;Cluster-44281.54194;Cluster-44281.8508;Cluster-56667.0;Cluster-44281.106928;Cluster-44281.24175;Cluster-44281.30542;Cluster-44281.100664;Cluster-44281.127428;Cluster-44281.145340;Cluster-44281.41356;Cluster-44281.5591…	K02291+K02291+K06443+K06443+K09838+K09838+K09838+K09838+K09838+K09838+K09838+K09838+K09839+K09839+K09839+K09840+K09840+K09840+K09840+K09840+K09840+K09840+K09840+K09840+K09841+K09841+K09841+K09841+K09841+K09841+K09841+K09841+K09841+K09841+K09841+K09841+K09841+K09841+K09841+K09841+K09841+K09841+K09841+K09841+K09841+K09841+K09841+K09842+K09842+K09842+K09842+K09842+K09842+K09843+K09843+K09843+K09843+…
Circadian rhythm - plant	ko04712	36 out of 3435 1.04803493449782%	410 out of 58977 0.695186259050138%	0.0098496	1	Cluster-44281.101719;Cluster-44281.55643;Cluster-44281.61553;Cluster-44281.62945;Cluster-44281.87201;Cluster-59649.0;Cluster-44281.36496;Cluster-44281.73936;Cluster-44281.81457;Cluster-44281.82540;Cluster-44281.28032;Cluster-44281.39817;Cluster-44281.79765;Cluster-44281.89477;Cluster-44281.80877;Cluster-44281.125391;Cluster-44281.45442;Cluster-44281.57244;Cluster-44281.81137;Cluster-44281.97591;C…	K00660+K00660+K00660+K00660+K00660+K03097+K10143+K12115+K12115+K12115+K12118+K12121+K12121+K12121+K12124+K12126+K12126+K12127+K12127+K12127+K12127+K12135+K12135+K12135+K12135+K12135+K12135+K12135+K12135+K12135+K16221+K16221+K16222+K16240+K16241+K16241		Carotenoid biosynthesis	ko00906	69 out of 8252 0.836160930683471%	346 out of 58977 0.586669379588653%	0.00141014	0.194599	Cluster-44281.95601;Cluster-44281.139865;Cluster-44281.23070;Cluster-44281.30063;Cluster-44281.54298;Cluster-44281.89891;Cluster-44281.111412;Cluster-44281.108807;Cluster-44281.11187;Cluster-44281.15213;Cluster-44281.27679;Cluster-44281.30033;Cluster-44281.30035;Cluster-44281.34354;Cluster-44281.58741;Cluster-56667.0;Cluster-44281.110883;Cluster-44281.24175;Cluster-44281.30542;Cluster-44281.61890…	K00514+K02291+K02291+K06443+K06444+K06444+K09837+K09838+K09838+K09838+K09838+K09838+K09838+K09838+K09838+K09838+K09839+K09839+K09839+K09839+K09840+K09840+K09840+K09840+K09840+K09840+K09840+K09840+K09840+K09840+K09840+K09841+K09841+K09841+K09841+K09841+K09841+K09841+K09841+K09841+K09841+K09841+K09841+K09841+K09841+K09841+K09841+K09841+K09841+K09841+K09841+K09841+K09841+K09841+K09842+K09842+K09842+…		Flavonoid biosynthesis	ko00941	80 out of 6519 1.22718208314159%	502 out of 58977 0.851179273276023%	0.000542861	0.074372	Cluster-44281.142231;Cluster-44281.49960;Cluster-44281.72239;Cluster-44281.83016;Cluster-44281.84518;Cluster-44281.89020;Cluster-44281.67456;Cluster-44281.71821;Cluster-44281.83522;Cluster-44281.34192;Cluster-44281.65880;Cluster-44281.73529;Cluster-44281.75508;Cluster-44281.75509;Cluster-44281.42636;Cluster-44281.48221;Cluster-44281.55643;Cluster-44281.87201;Cluster-44281.45474;Cluster-44281.4644…	K00475+K00475+K00475+K00475+K00475+K00475+K00487+K00487+K00487+K00588+K00588+K00588+K00588+K00588+K00660+K00660+K00660+K00660+K01859+K01859+K01859+K01859+K01859+K01859+K05277+K05277+K05277+K05277+K05277+K05277+K05277+K05277+K05277+K05278+K05278+K05278+K05278+K05278+K05278+K05278+K05278+K05278+K05278+K05278+K05278+K05278+K05278+K05278+K05278+K05278+K05278+K05278+K05280+K05280+K05280+K09754+K09754+…
Cutin, suberine and wax biosynthesis	ko00073	31 out of 3435 0.902474526928675%	348 out of 58977 0.590060532071825%	0.0129937	1	Cluster-44281.105367;Cluster-44281.130385;Cluster-44281.21662;Cluster-44281.86368;Cluster-44281.73640;Cluster-44281.108787;Cluster-44281.108961;Cluster-44281.29772;Cluster-44281.3743;Cluster-44281.52602;Cluster-44281.76320;Cluster-44281.79467;Cluster-44281.87413;Cluster-44281.94472;Cluster-44281.95906;Cluster-44281.116838;Cluster-65609.0;Cluster-44281.138403;Cluster-38953.0;Cluster-44281.120982;C…	K13356+K13356+K13356+K13407+K15398+K15400+K15400+K15400+K15400+K15400+K15400+K15400+K15400+K15400+K15400+K15402+K15402+K15403+K15404+K15406+K15406+K15406+K17991+K17991+K20495+K20769+K20769+K20769+K20769+K20769+K20769		Taurine and hypotaurine metabolism	ko00430	29 out of 8252 0.351429956374212%	120 out of 58977 0.203469148990284%	0.00198441	0.273848	Cluster-44281.64797;Cluster-44281.101252;Cluster-44281.101253;Cluster-44281.125310;Cluster-44281.12755;Cluster-44281.145868;Cluster-44281.34108;Cluster-44281.43374;Cluster-44281.69868;Cluster-44281.75829;Cluster-44281.75833;Cluster-44281.75836;Cluster-44281.75837;Cluster-44281.79210;Cluster-44281.82004;Cluster-12027.0;Cluster-14888.0;Cluster-24132.0;Cluster-44281.126585;Cluster-44281.27381;Cluste…	K00681+K01580+K01580+K01580+K01580+K01580+K01580+K01580+K01580+K01580+K01580+K01580+K01580+K01580+K01580+K10712+K10712+K10712+K10712+K10712+K10712+K10712+K10712+K10712+K10712+K18592+K18592+K18592+K18592		Amino sugar and nucleotide sugar metabolism	ko00520	180 out of 6519 2.76115968706857%	1289 out of 58977 2.18559777540397%	0.000630568	0.0863878	Cluster-44281.60270;Cluster-44281.66948;Cluster-44281.77261;Cluster-44281.79851;Cluster-44281.10111;Cluster-50847.0;Cluster-44281.137137;Cluster-44281.31213;Cluster-44281.54967;Cluster-44281.65414;Cluster-44281.84606;Cluster-44281.85673;Cluster-44281.99847;Cluster-44281.38779;Cluster-44281.41396;Cluster-44281.56088;Cluster-44281.92007;Cluster-62868.0;Cluster-44281.48692;Cluster-44281.66722;Cluste…	K00012+K00012+K00012+K00012+K00698+K00698+K00820+K00820+K00820+K00820+K00820+K00820+K00820+K00844+K00844+K00844+K00844+K00844+K00847+K00847+K00847+K00847+K00847+K00963+K00963+K00963+K00963+K00963+K00963+K00963+K00965+K00965+K00966+K00966+K00966+K00966+K00966+K00966+K00966+K00972+K00972+K00972+K00975+K00975+K00975+K00975+K00975+K00975+K01183+K01183+K01183+K01183+K01183+K01183+K01183+K01183+K01183+…
Nitrogen metabolism	ko00910	30 out of 3435 0.873362445414847%	365 out of 58977 0.618885328178782%	0.0373684	1	Cluster-64421.0;Cluster-44281.5542;Cluster-44281.88037;Cluster-44281.95628;Cluster-44281.18284;Cluster-44281.73954;Cluster-44281.116717;Cluster-44281.103832;Cluster-44281.53763;Cluster-44281.84277;Cluster-44281.52057;Cluster-44281.56372;Cluster-44281.63480;Cluster-44281.96917;Cluster-44281.107983;Cluster-44281.6178;Cluster-44281.88778;Cluster-44281.89690;Cluster-44281.93643;Cluster-44281.79255;Cl…	K00262+K00264+K00264+K00264+K00284+K00284+K00366+K01455+K01455+K01455+K01673+K01673+K01673+K01673+K01674+K01674+K01674+K01674+K01674+K01725+K01915+K01915+K01915+K01915+K01915+K01915+K01915+K02575+K10534+K10534		Cutin, suberine and wax biosynthesis	ko00073	68 out of 8252 0.824042656325739%	348 out of 58977 0.590060532071825%	0.00257072	0.354759	Cluster-44281.105367;Cluster-44281.105369;Cluster-44281.105370;Cluster-44281.130385;Cluster-44281.135998;Cluster-44281.21662;Cluster-44281.42990;Cluster-44281.119490;Cluster-44281.86368;Cluster-44281.108787;Cluster-44281.139259;Cluster-44281.29772;Cluster-44281.30207;Cluster-44281.3743;Cluster-44281.52602;Cluster-44281.60358;Cluster-44281.64452;Cluster-44281.65523;Cluster-44281.76320;Cluster-4428…	K13356+K13356+K13356+K13356+K13356+K13356+K13356+K13407+K13407+K15400+K15400+K15400+K15400+K15400+K15400+K15400+K15400+K15400+K15400+K15400+K15400+K15400+K15400+K15400+K15402+K15402+K15402+K15402+K15403+K15403+K15403+K15403+K15404+K15404+K15404+K15404+K15404+K15404+K15406+K15406+K15406+K15406+K15406+K17991+K17991+K17991+K17991+K17991+K17991+K17991+K17991+K17991+K17991+K17991+K17991+K17991+K20495+…		Ascorbate and aldarate metabolism	ko00053	87 out of 6519 1.33456051541648%	565 out of 58977 0.958000576495922%	0.000958699	0.131342	Cluster-44281.60270;Cluster-44281.66948;Cluster-44281.77261;Cluster-44281.79851;Cluster-44281.103770;Cluster-44281.108053;Cluster-44281.126483;Cluster-44281.130832;Cluster-44281.19464;Cluster-44281.28241;Cluster-44281.28244;Cluster-44281.32468;Cluster-44281.39244;Cluster-44281.42952;Cluster-44281.42953;Cluster-44281.47976;Cluster-44281.58744;Cluster-44281.64927;Cluster-44281.65377;Cluster-44281.8…	K00012+K00012+K00012+K00012+K00103+K00103+K00103+K00103+K00103+K00103+K00103+K00103+K00103+K00103+K00103+K00103+K00103+K00103+K00103+K00103+K00103+K00128+K00128+K00128+K00128+K00128+K00128+K00128+K00128+K00128+K00128+K00128+K00128+K00128+K00128+K00128+K00225+K00423+K00423+K00423+K00423+K00423+K00423+K00423+K00423+K00423+K00423+K00423+K00423+K00423+K00423+K00434+K00434+K00434+K00434+K00434+K00434+…
Diterpenoid biosynthesis	ko00904	37 out of 3435 1.07714701601164%	486 out of 58977 0.824050053410652%	0.0597928	1	Cluster-44281.11369;Cluster-44281.116701;Cluster-44281.124695;Cluster-44281.127810;Cluster-44281.28081;Cluster-44281.28096;Cluster-44281.6976;Cluster-44281.77081;Cluster-44281.78457;Cluster-44281.84445;Cluster-44281.95324;Cluster-44281.140774;Cluster-44281.79615;Cluster-44281.85146;Cluster-44281.94669;Cluster-44281.45484;Cluster-44281.53211;Cluster-44281.65449;Cluster-44281.80159;Cluster-44281.99…	K04120+K04120+K04120+K04120+K04120+K04120+K04120+K04120+K04120+K04120+K04120+K04121+K04121+K04121+K04121+K04122+K04122+K04122+K04122+K04122+K04124+K04124+K04124+K04124+K04124+K04124+K04124+K04124+K04124+K05282+K05282+K05282+K16086+K16086+K16086+K16086+K16086		Galactose metabolism	ko00052	158 out of 8252 1.91468734852157%	913 out of 58977 1.54806110856775%	0.00264868	0.365518	Cluster-44281.58457;Cluster-44281.135298;Cluster-44281.38779;Cluster-44281.41396;Cluster-44281.56036;Cluster-44281.56081;Cluster-44281.56088;Cluster-44281.67199;Cluster-44281.86806;Cluster-62868.0;Cluster-44281.103569;Cluster-44281.30021;Cluster-44281.41416;Cluster-44281.48007;Cluster-44281.53191;Cluster-44281.57013;Cluster-44281.58703;Cluster-44281.58704;Cluster-44281.58705;Cluster-44281.65714;C…	K00011+K00844+K00844+K00844+K00844+K00844+K00844+K00844+K00844+K00844+K00850+K00850+K00850+K00850+K00850+K00850+K00850+K00850+K00850+K00850+K00850+K00850+K00850+K00850+K00850+K00963+K00963+K00963+K00963+K00963+K00963+K00963+K00963+K00965+K00965+K00965+K01187+K01187+K01187+K01187+K01187+K01187+K01187+K01187+K01187+K01190+K01190+K01193+K01193+K01193+K01193+K01193+K01193+K01193+K01193+K01193+K01193+…		Monoterpenoid biosynthesis	ko00902	46 out of 6519 0.705629697806412%	275 out of 58977 0.466283466436068%	0.00289168	0.39616	Cluster-44281.105935;Cluster-44281.111041;Cluster-44281.118896;Cluster-44281.125537;Cluster-44281.17421;Cluster-44281.25303;Cluster-44281.33272;Cluster-44281.34126;Cluster-44281.84001;Cluster-44281.134374;Cluster-44281.135515;Cluster-44281.140123;Cluster-44281.27073;Cluster-44281.78232;Cluster-44281.133450;Cluster-44281.52004;Cluster-41170.0;Cluster-44281.135745;Cluster-44281.80465;Cluster-44281.…	K07385+K07385+K07385+K07385+K07385+K07385+K07385+K07385+K07385+K15095+K15095+K15095+K15095+K15095+K20618+K20979+K21373+K21373+K21373+K21373+K21374+K21374+K21374+K21374+K21374+K21374+K21374+K21374+K21374+K21374+K21374+K21374+K21374+K21374+K21374+K21374+K21374+K21374+K21374+K21374+K21374+K21374+K21374+K21374+K21374+K21374
Porphyrin and chlorophyll metabolism	ko00860	33 out of 3435 0.960698689956332%	430 out of 58977 0.729097783881852%	0.0660465	1	Cluster-44281.59564;Cluster-44281.93611;Cluster-44281.99300;Cluster-41549.0;Cluster-44281.8984;Cluster-44281.41852;Cluster-44281.115886;Cluster-44281.126268;Cluster-44281.54795;Cluster-44281.96323;Cluster-44281.42891;Cluster-44281.107560;Cluster-44281.43404;Cluster-44281.40254;Cluster-44281.76659;Cluster-44281.84078;Cluster-44281.123544;Cluster-44281.30029;Cluster-44281.104008;Cluster-44281.26910…	K00218+K00218+K00228+K00643+K00643+K01599+K01772+K01772+K01772+K02257+K02259+K02303+K02303+K02492+K02492+K02492+K03404+K03404+K03428+K08099+K08099+K08099+K08099+K13071+K13071+K13071+K13544+K13544+K19073+K19073+K22013+K22013+K22013		Inositol phosphate metabolism	ko00562	131 out of 8252 1.58749394086282%	751 out of 58977 1.27337775743086%	0.00437303	0.603478	Cluster-1014.0;Cluster-44281.102421;Cluster-44281.111816;Cluster-44281.118050;Cluster-44281.140075;Cluster-44281.27921;Cluster-44281.96780;Cluster-66070.0;Cluster-44281.144115;Cluster-44281.22593;Cluster-77207.0;Cluster-41735.0;Cluster-44281.104482;Cluster-44281.39327;Cluster-44281.39330;Cluster-44281.41105;Cluster-44281.43297;Cluster-44281.43298;Cluster-44281.57099;Cluster-44281.58397;Cluster-44…	K00010+K00010+K00010+K00010+K00010+K00010+K00010+K00010+K00140+K00140+K00140+K00469+K00469+K00469+K00469+K00469+K00469+K00469+K00469+K00469+K00469+K00469+K00469+K00469+K00469+K00469+K00469+K00889+K00889+K00889+K00889+K00889+K00889+K00889+K00889+K00889+K00889+K00913+K00914+K00914+K00914+K00915+K00915+K00915+K00915+K00921+K00921+K00921+K00921+K00999+K00999+K00999+K01092+K01092+K01092+K01092+K01092+…		Glycolysis / Gluconeogenesis	ko00010	243 out of 6519 3.72756557754257%	1857 out of 58977 3.14868508062465%	0.00304809	0.417588	Cluster-44281.115133;Cluster-44281.115134;Cluster-56640.0;Cluster-43949.0;Cluster-44281.101432;Cluster-44281.103806;Cluster-44281.106550;Cluster-44281.116006;Cluster-44281.127884;Cluster-44281.128135;Cluster-44281.128944;Cluster-44281.19089;Cluster-44281.337;Cluster-44281.37742;Cluster-44281.37743;Cluster-44281.43076;Cluster-44281.50056;Cluster-44281.52902;Cluster-44281.58274;Cluster-44281.66130;…	K00001+K00001+K00001+K00002+K00002+K00002+K00002+K00002+K00002+K00002+K00002+K00002+K00002+K00002+K00002+K00002+K00002+K00002+K00002+K00002+K00002+K00002+K00002+K00002+K00002+K00002+K00002+K00002+K00016+K00016+K00016+K00121+K00121+K00121+K00121+K00121+K00121+K00121+K00121+K00121+K00121+K00121+K00128+K00128+K00128+K00128+K00128+K00128+K00128+K00128+K00128+K00128+K00128+K00128+K00128+K00128+K00128+…
Cyanoamino acid metabolism	ko00460	48 out of 3435 1.39737991266376%	660 out of 58977 1.11908031944656%	0.0684982	1	Cluster-44281.108023;Cluster-44281.115556;Cluster-44281.126216;Cluster-44281.23712;Cluster-44281.38870;Cluster-44281.66056;Cluster-44281.77803;Cluster-44281.86104;Cluster-44281.88637;Cluster-44281.89296;Cluster-37842.0;Cluster-44281.119639;Cluster-44281.121899;Cluster-44281.121900;Cluster-44281.124834;Cluster-44281.45792;Cluster-44281.61807;Cluster-44281.74383;Cluster-44281.83491;Cluster-8861.0;C…	K00600+K00600+K00600+K00600+K00600+K00600+K00600+K00600+K00600+K00600+K01188+K01188+K01188+K01188+K01188+K01188+K01188+K01188+K01188+K01188+K01455+K01455+K01455+K05349+K05349+K05349+K05349+K05349+K05349+K05349+K05349+K05350+K05350+K05350+K05350+K05350+K05350+K05350+K05350+K08248+K08248+K08248+K08248+K13033+K13051+K18592+K18592+K20802		Other types of O-glycan biosynthesis	ko00514	49 out of 8252 0.593795443528842%	243 out of 58977 0.412025026705326%	0.00504855	0.6967	Cluster-44281.12159;Cluster-44281.35097;Cluster-4610.0;Cluster-44281.112597;Cluster-44281.13259;Cluster-44281.148516;Cluster-44281.22387;Cluster-44281.46756;Cluster-44281.54488;Cluster-44281.65207;Cluster-44281.65208;Cluster-44281.65209;Cluster-44281.65210;Cluster-44281.65213;Cluster-44281.80811;Cluster-44281.81948;Cluster-44281.84774;Cluster-44281.84775;Cluster-44281.85378;Cluster-44281.91485;Cl…	K00728+K00728+K00728+K09667+K09667+K09667+K09667+K09667+K09667+K09667+K09667+K09667+K09667+K09667+K09667+K09667+K09667+K09667+K09667+K09667+K09667+K10967+K10967+K13667+K13667+K13667+K13667+K13667+K13667+K13667+K13667+K13675+K13675+K13675+K13675+K13675+K13675+K13675+K13675+K13675+K18134+K18134+K18134+K18134+K18134+K20781+K20781+K20782+K20783		Glycerolipid metabolism	ko00561	143 out of 6519 2.19358797361558%	1052 out of 58977 1.78374620614816%	0.00559945	0.767124	Cluster-43949.0;Cluster-44281.101432;Cluster-44281.103806;Cluster-44281.106550;Cluster-44281.116006;Cluster-44281.127884;Cluster-44281.128135;Cluster-44281.128944;Cluster-44281.19089;Cluster-44281.337;Cluster-44281.37742;Cluster-44281.37743;Cluster-44281.43076;Cluster-44281.50056;Cluster-44281.52902;Cluster-44281.58274;Cluster-44281.66130;Cluster-44281.75052;Cluster-44281.76156;Cluster-44281.7644…	K00002+K00002+K00002+K00002+K00002+K00002+K00002+K00002+K00002+K00002+K00002+K00002+K00002+K00002+K00002+K00002+K00002+K00002+K00002+K00002+K00002+K00002+K00002+K00002+K00002+K00128+K00128+K00128+K00128+K00128+K00128+K00128+K00128+K00128+K00128+K00128+K00128+K00128+K00128+K00128+K00679+K00679+K00679+K00679+K00679+K00679+K00679+K00679+K00679+K00679+K00679+K00679+K00679+K00679+K00679+K00679+K00679+…
Terpenoid backbone biosynthesis	ko00900	43 out of 3435 1.25181950509461%	594 out of 58977 1.00717228750191%	0.0851599	1	Cluster-33770.0;Cluster-44281.90726;Cluster-44281.146243;Cluster-44281.95615;Cluster-44281.31393;Cluster-44281.68914;Cluster-25224.4;Cluster-44281.400;Cluster-44281.50546;Cluster-44281.145573;Cluster-44281.145574;Cluster-81113.0;Cluster-44281.84636;Cluster-44281.117142;Cluster-44281.58261;Cluster-44281.58262;Cluster-44281.112990;Cluster-44281.124694;Cluster-44281.130177;Cluster-44281.134770;Clust…	K00021+K00099+K00626+K00626+K00869+K00991+K01641+K01641+K01641+K01770+K01770+K01823+K03527+K11778+K11778+K11778+K12742+K12742+K12742+K12742+K12742+K12742+K12742+K12742+K12742+K12742+K12742+K12742+K12742+K12742+K12742+K12742+K12742+K12742+K12742+K12742+K12742+K12742+K12742+K12742+K13789+K15889+K15889		Amino sugar and nucleotide sugar metabolism	ko00520	212 out of 8252 2.56907416383907%	1289 out of 58977 2.18559777540397%	0.00653244	0.901477	Cluster-44281.60270;Cluster-44281.66948;Cluster-44281.77261;Cluster-7427.0;Cluster-44281.10959;Cluster-44281.10111;Cluster-44281.132249;Cluster-44281.132250;Cluster-44281.135050;Cluster-44281.144549;Cluster-44281.147912;Cluster-44281.23473;Cluster-44281.33212;Cluster-50847.0;Cluster-53989.0;Cluster-53989.1;Cluster-44281.31213;Cluster-44281.54967;Cluster-44281.84606;Cluster-44281.85673;Cluster-442…	K00012+K00012+K00012+K00326+K00621+K00698+K00698+K00698+K00698+K00698+K00698+K00698+K00698+K00698+K00698+K00698+K00820+K00820+K00820+K00820+K00844+K00844+K00844+K00844+K00844+K00844+K00844+K00844+K00844+K00847+K00847+K00847+K00847+K00847+K00963+K00963+K00963+K00963+K00963+K00963+K00963+K00963+K00965+K00965+K00965+K00966+K00966+K00966+K00966+K00966+K00966+K00966+K00966+K00972+K00972+K00972+K00975+…		Biosynthesis of secondary metabolites - other antibiotics	ko00998	8 out of 6519 0.122718208314159%	28 out of 58977 0.0474761347643997%	0.00901512	1	Cluster-18324.0;Cluster-44281.105876;Cluster-44281.19344;Cluster-44281.33069;Cluster-44281.47120;Cluster-44281.52375;Cluster-44281.59631;Cluster-44281.80675	K21568+K21568+K21568+K21568+K21568+K21568+K21568+K21568
Starch and sucrose metabolism	ko00500	125 out of 3435 3.63901018922853%	1974 out of 58977 3.34706750089018%	0.175312	1	Cluster-44281.58987;Cluster-44281.97630;Cluster-17271.0;Cluster-64018.0;Cluster-44281.52599;Cluster-44281.74583;Cluster-44281.83136;Cluster-34610.0;Cluster-44281.78419;Cluster-44281.64247;Cluster-44281.66451;Cluster-44281.67370;Cluster-44281.51715;Cluster-44281.64455;Cluster-44281.83613;Cluster-44281.41396;Cluster-44281.56036;Cluster-44281.53954;Cluster-44281.71127;Cluster-44281.129265;Cluster-44…	K00688+K00688+K00693+K00693+K00695+K00695+K00695+K00700+K00700+K00703+K00703+K00703+K00705+K00705+K00706+K00844+K00844+K00847+K00847+K00963+K00963+K00975+K00975+K00975+K01176+K01176+K01176+K01176+K01176+K01176+K01177+K01177+K01177+K01177+K01177+K01177+K01179+K01179+K01179+K01179+K01179+K01179+K01179+K01179+K01179+K01179+K01179+K01179+K01179+K01187+K01187+K01187+K01187+K01188+K01188+K01188+K01188+…		Fatty acid degradation	ko00071	145 out of 8252 1.75714978187106%	851 out of 58977 1.44293538158943%	0.00667657	0.921367	Cluster-44281.113887;Cluster-44281.115133;Cluster-44281.115134;Cluster-44281.140179;Cluster-56640.0;Cluster-896.0;Cluster-42540.0;Cluster-44281.128771;Cluster-44281.136475;Cluster-44281.136477;Cluster-44281.136480;Cluster-44281.139026;Cluster-44281.30131;Cluster-44281.44019;Cluster-4862.0;Cluster-31771.0;Cluster-34900.0;Cluster-36458.0;Cluster-44281.114692;Cluster-44281.129550;Cluster-44281.14229…	K00001+K00001+K00001+K00001+K00001+K00001+K00121+K00121+K00121+K00121+K00121+K00121+K00121+K00121+K00121+K00128+K00128+K00128+K00128+K00128+K00128+K00128+K00128+K00128+K00128+K00128+K00128+K00128+K00128+K00128+K00128+K00128+K00128+K00128+K00128+K00128+K00232+K00232+K00232+K00232+K00232+K00232+K00249+K00249+K00249+K00626+K00626+K00626+K00626+K01897+K01897+K01897+K01897+K01897+K01897+K01897+K01897+…		Riboflavin metabolism	ko00740	40 out of 6519 0.613591041570793%	248 out of 58977 0.420502907913254%	0.00952974	1	Cluster-44281.59126;Cluster-44281.61792;Cluster-16986.0;Cluster-44281.104382;Cluster-44281.108476;Cluster-44281.42251;Cluster-44281.53607;Cluster-44281.55444;Cluster-44281.57714;Cluster-44281.125577;Cluster-44281.127426;Cluster-44281.38546;Cluster-44281.77699;Cluster-44281.84745;Cluster-44281.101887;Cluster-44281.105338;Cluster-44281.106388;Cluster-44281.106389;Cluster-44281.106394;Cluster-44281.…	K00794+K00794+K01513+K01513+K01513+K01513+K01513+K01513+K01513+K11752+K11752+K11752+K11752+K11752+K14379+K14379+K14379+K14379+K14379+K14379+K14379+K14379+K14379+K14379+K14379+K14379+K14379+K14379+K14379+K14652+K14652+K14652+K14652+K14652+K18453+K18453+K18453+K20884+K22912+K22912
Folate biosynthesis	ko00790	18 out of 3435 0.524017467248908%	252 out of 58977 0.427285212879597%	0.21827	1	Cluster-56886.0;Cluster-40324.0;Cluster-44281.148948;Cluster-44281.74133;Cluster-44281.101151;Cluster-44281.138597;Cluster-44281.15580;Cluster-44281.51179;Cluster-44281.80391;Cluster-44281.127463;Cluster-44281.55388;Cluster-44281.7737;Cluster-44281.88120;Cluster-44281.121459;Cluster-44281.149762;Cluster-44281.50746;Cluster-44281.61503;Cluster-44281.85012	K01077+K01113+K01113+K01307+K01633+K01633+K01724+K01930+K01930+K13950+K13950+K13950+K13950+K14652+K14652+K15631+K15631+K20457		Terpenoid backbone biosynthesis	ko00900	101 out of 8252 1.22394571013088%	594 out of 58977 1.00717228750191%	0.021399	1	Cluster-33770.0;Cluster-44281.102275;Cluster-44281.124345;Cluster-44281.124346;Cluster-44281.128191;Cluster-44281.42394;Cluster-44281.42397;Cluster-44281.57570;Cluster-44281.64651;Cluster-44281.75476;Cluster-44281.75477;Cluster-44281.98918;Cluster-44281.90726;Cluster-44281.104561;Cluster-44281.146243;Cluster-44281.95615;Cluster-44281.99919;Cluster-44281.149404;Cluster-25224.4;Cluster-44281.400;Cl…	K00021+K00021+K00021+K00021+K00021+K00021+K00021+K00021+K00021+K00021+K00021+K00021+K00099+K00626+K00626+K00626+K00626+K00869+K01641+K01641+K01641+K01662+K01662+K01662+K01662+K01770+K01823+K01823+K03526+K03527+K05356+K05955+K06013+K06013+K06013+K08658+K11778+K11778+K11778+K11778+K12742+K12742+K12742+K12742+K12742+K12742+K12742+K12742+K12742+K12742+K12742+K12742+K12742+K12742+K12742+K12742+K12742+…		Stilbenoid, diarylheptanoid and gingerol biosynthesis	ko00945	23 out of 6519 0.352814848903206%	129 out of 58977 0.218729335164556%	0.0141916	1	Cluster-44281.67456;Cluster-44281.71821;Cluster-44281.83522;Cluster-44281.34192;Cluster-44281.65880;Cluster-44281.73529;Cluster-44281.75508;Cluster-44281.75509;Cluster-44281.129088;Cluster-44281.34062;Cluster-44281.72193;Cluster-44281.72734;Cluster-44281.81101;Cluster-44281.109665;Cluster-44281.122233;Cluster-44281.122234;Cluster-44281.122237;Cluster-44281.122238;Cluster-44281.122244;Cluster-4428…	K00487+K00487+K00487+K00588+K00588+K00588+K00588+K00588+K09754+K09754+K09754+K09754+K09754+K13065+K13065+K13065+K13065+K13065+K13065+K13065+K13065+K13065+K16040
Glutathione metabolism	ko00480	51 out of 3435 1.48471615720524%	782 out of 58977 1.32594062092002%	0.220384	1	Cluster-44281.121113;Cluster-44281.138911;Cluster-44281.66456;Cluster-44281.68097;Cluster-44281.80555;Cluster-43564.7;Cluster-44281.10789;Cluster-44281.36955;Cluster-44281.29082;Cluster-44281.98878;Cluster-27347.0;Cluster-44281.9107;Cluster-44281.101489;Cluster-44281.25712;Cluster-44281.27935;Cluster-44281.91724;Cluster-44281.47581;Cluster-44281.108712;Cluster-44281.109441;Cluster-44281.110440;Cl…	K00031+K00031+K00031+K00031+K00031+K00033+K00033+K00033+K00036+K00036+K00432+K00432+K00434+K00434+K00434+K00434+K00797+K00799+K00799+K00799+K00799+K00799+K00799+K00799+K00799+K00799+K00799+K00799+K00799+K00799+K00799+K00799+K00799+K00799+K00799+K00799+K00799+K00799+K00799+K00799+K00799+K01256+K01581+K18592+K18592+K21888+K21888+K21888+K21888+K21888+K22596		Phosphatidylinositol signaling system	ko04070	112 out of 8252 1.35724672806592%	669 out of 58977 1.13434050562084%	0.0244469	1	Cluster-44281.126804;Cluster-44281.134554;Cluster-44281.134555;Cluster-44281.24386;Cluster-44281.69175;Cluster-44281.70385;Cluster-44281.78470;Cluster-44281.78931;Cluster-44281.78932;Cluster-63440.0;Cluster-44281.40713;Cluster-44281.44729;Cluster-44281.62442;Cluster-44281.67425;Cluster-44281.80624;Cluster-44281.91159;Cluster-44281.939;Cluster-44281.942;Cluster-44281.96088;Cluster-44281.97008;Clus…	K00889+K00889+K00889+K00889+K00889+K00889+K00889+K00889+K00889+K00889+K00901+K00901+K00901+K00901+K00901+K00901+K00901+K00901+K00901+K00901+K00913+K00914+K00914+K00914+K00915+K00915+K00915+K00915+K00921+K00921+K00921+K00921+K00981+K00981+K00999+K00999+K00999+K01092+K01092+K01092+K01092+K01092+K01092+K01092+K01092+K01099+K01099+K01099+K01099+K01099+K01106+K01110+K01110+K01110+K01110+K02183+K02183+…		Inositol phosphate metabolism	ko00562	101 out of 6519 1.54931737996625%	751 out of 58977 1.27337775743086%	0.0224548	1	Cluster-1014.0;Cluster-44281.102421;Cluster-44281.111816;Cluster-44281.140075;Cluster-44281.27921;Cluster-44281.96780;Cluster-66070.0;Cluster-77207.0;Cluster-41735.0;Cluster-44281.104482;Cluster-44281.39327;Cluster-44281.41105;Cluster-44281.43295;Cluster-44281.58397;Cluster-44281.83475;Cluster-44281.92180;Cluster-44281.92182;Cluster-44281.94474;Cluster-44281.95125;Cluster-44281.2365;Cluster-44281…	K00010+K00010+K00010+K00010+K00010+K00010+K00010+K00140+K00469+K00469+K00469+K00469+K00469+K00469+K00469+K00469+K00469+K00469+K00469+K00889+K00889+K00889+K00889+K00889+K00889+K00889+K00913+K00914+K00914+K00914+K00914+K00915+K00915+K00915+K00915+K00915+K00921+K00921+K00921+K00921+K00921+K01092+K01092+K01092+K01092+K01099+K01099+K01099+K01099+K01110+K01110+K01114+K01114+K01114+K01114+K01114+K01114+…
Glycosylphosphatidylinositol (GPI)-anchor biosynthesis	ko00563	17 out of 3435 0.49490538573508%	246 out of 58977 0.417111755430083%	0.268134	1	Cluster-44281.109849;Cluster-44281.66052;Cluster-44281.78662;Cluster-44281.129965;Cluster-36191.0;Cluster-44281.122718;Cluster-44281.40706;Cluster-44281.50582;Cluster-44281.50584;Cluster-44281.5650;Cluster-44281.63076;Cluster-44281.63753;Cluster-44281.66121;Cluster-967.0;Cluster-44281.102042;Cluster-44281.108149;Cluster-44281.93987	K03857+K03857+K03857+K03859+K03860+K03860+K03860+K03860+K03860+K03860+K03860+K03860+K03860+K03860+K05290+K05291+K05294		Photosynthesis	ko00195	48 out of 8252 0.58167716917111%	260 out of 58977 0.440849822812283%	0.0263221	1	Cluster-44281.135933;Cluster-44281.102629;Cluster-44281.117684;Cluster-44281.52478;Cluster-44281.64189;Cluster-44281.43396;Cluster-44281.61346;Cluster-44281.70979;Cluster-44281.59247;Cluster-44281.64913;Cluster-44281.72670;Cluster-44281.99944;Cluster-44281.108420;Cluster-44281.81102;Cluster-44281.83791;Cluster-44281.86516;Cluster-44281.38542;Cluster-44281.59205;Cluster-44281.64017;Cluster-44281.6…	K02111+K02113+K02115+K02115+K02636+K02638+K02638+K02638+K02639+K02639+K02639+K02639+K02641+K02641+K02641+K02689+K02690+K02693+K02693+K02694+K02695+K02695+K02698+K02698+K02699+K02701+K02703+K02703+K02703+K02704+K02705+K02716+K02716+K02717+K02717+K02717+K02717+K02717+K02717+K02721+K02723+K03541+K03541+K03541+K08901+K08905+K08905+K14332		Sesquiterpenoid and triterpenoid biosynthesis	ko00909	13 out of 6519 0.199417088510508%	65 out of 58977 0.110212455703071%	0.0241502	1	Cluster-44281.19213;Cluster-44281.97983;Cluster-75519.0;Cluster-69963.0;Cluster-44281.102008;Cluster-44281.30761;Cluster-44281.30892;Cluster-44281.38286;Cluster-44281.42667;Cluster-44281.52175;Cluster-44281.54013;Cluster-44281.75537;Cluster-44281.78735	K00511+K00511+K00511+K00801+K15803+K15803+K15803+K15803+K15803+K15803+K15803+K15803+K15891
Protein processing in endoplasmic reticulum	ko04141	163 out of 3435 4.745269286754%	2679 out of 58977 4.5424487512081%	0.289813	1	Cluster-44281.134882;Cluster-44281.39183;Cluster-44281.57707;Cluster-44281.122632;Cluster-44281.43467;Cluster-11528.0;Cluster-30087.0;Cluster-30434.0;Cluster-44281.10876;Cluster-44281.112822;Cluster-44281.119355;Cluster-44281.122854;Cluster-44281.128586;Cluster-44281.140400;Cluster-44281.142486;Cluster-44281.18338;Cluster-44281.18777;Cluster-44281.19705;Cluster-44281.25075;Cluster-44281.25079;Clu…	K01228+K01228+K01228+K01456+K01456+K03283+K03283+K03283+K03283+K03283+K03283+K03283+K03283+K03283+K03283+K03283+K03283+K03283+K03283+K03283+K03283+K03283+K03283+K03283+K03283+K03283+K03283+K03283+K03283+K03283+K03283+K03283+K03283+K03283+K03283+K03283+K03283+K03283+K03283+K03283+K03283+K03283+K03283+K03347+K03868+K03868+K03868+K03868+K04079+K04079+K04079+K04079+K04079+K04079+K04079+K04079+K04079+…		Glutathione metabolism	ko00480	128 out of 8252 1.55113911778963%	782 out of 58977 1.32594062092002%	0.032268	1	Cluster-44281.121113;Cluster-44281.80555;Cluster-43564.12;Cluster-43564.2;Cluster-43564.7;Cluster-44281.46104;Cluster-44281.74905;Cluster-44281.74906;Cluster-44281.74907;Cluster-44281.115750;Cluster-44281.135319;Cluster-44281.59027;Cluster-44281.60786;Cluster-44281.80195;Cluster-44281.94208;Cluster-44281.98878;Cluster-44281.17977;Cluster-44281.65072;Cluster-27347.0;Cluster-44281.36157;Cluster-442…	K00031+K00031+K00033+K00033+K00033+K00033+K00033+K00033+K00033+K00036+K00036+K00036+K00036+K00036+K00036+K00036+K00383+K00383+K00432+K00432+K00432+K00432+K00432+K00432+K00432+K00432+K00432+K00432+K00432+K00434+K00434+K00434+K00434+K00434+K00434+K00434+K00434+K00434+K00434+K00434+K00681+K00797+K00797+K00797+K00799+K00799+K00799+K00799+K00799+K00799+K00799+K00799+K00799+K00799+K00799+K00799+K00799+…		Ether lipid metabolism	ko00565	35 out of 6519 0.536892161374444%	227 out of 58977 0.384895806839955%	0.026995	1	Cluster-44281.112560;Cluster-44281.139808;Cluster-44281.60481;Cluster-44281.66583;Cluster-44281.66584;Cluster-44281.92163;Cluster-44281.92164;Cluster-44281.92165;Cluster-44281.143514;Cluster-44281.54245;Cluster-44281.72446;Cluster-44281.80135;Cluster-44281.91303;Cluster-44281.43771;Cluster-44281.52877;Cluster-44281.55397;Cluster-44281.68047;Cluster-44281.90547;Cluster-44281.9446;Cluster-44281.993…	K00993+K00993+K00993+K00993+K00993+K00993+K00993+K00993+K01047+K01047+K01047+K01047+K01047+K01114+K01114+K01114+K01114+K01114+K01114+K01114+K01114+K01115+K01115+K01115+K01115+K01115+K01115+K04628+K13519+K13519+K14674+K14674+K16817+K16817+K16817
Ribosome	ko03010	319 out of 3435 9.28675400291121%	5328 out of 58977 9.03403021516863%	0.30598	1	Cluster-44281.145913;Cluster-44281.15298;Cluster-44281.30292;Cluster-44281.60240;Cluster-44281.68936;Cluster-51563.1;Cluster-44281.125221;Cluster-44281.125228;Cluster-44281.125230;Cluster-44281.125233;Cluster-44281.46693;Cluster-44281.48154;Cluster-44281.72453;Cluster-44281.112083;Cluster-44281.125402;Cluster-44281.125405;Cluster-44281.139885;Cluster-44281.124856;Cluster-44281.42225;Cluster-44281…	K02865+K02865+K02865+K02865+K02865+K02865+K02866+K02866+K02866+K02866+K02866+K02866+K02866+K02868+K02868+K02868+K02868+K02870+K02870+K02870+K02870+K02870+K02870+K02870+K02871+K02872+K02872+K02872+K02872+K02872+K02872+K02873+K02873+K02873+K02873+K02873+K02875+K02875+K02875+K02877+K02877+K02877+K02877+K02877+K02879+K02879+K02880+K02880+K02880+K02880+K02880+K02880+K02881+K02881+K02881+K02881+K02882+…		Fructose and mannose metabolism	ko00051	112 out of 8252 1.35724672806592%	683 out of 58977 1.15807857300304%	0.0407005	1	Cluster-44281.108562;Cluster-44281.121370;Cluster-44281.128589;Cluster-44281.21608;Cluster-44281.21609;Cluster-44281.22447;Cluster-44281.46729;Cluster-44281.76775;Cluster-44281.76776;Cluster-44281.76777;Cluster-44281.76961;Cluster-44281.86490;Cluster-45520.0;Cluster-44281.115798;Cluster-44281.144295;Cluster-73924.0;Cluster-44281.58457;Cluster-44281.135298;Cluster-44281.38779;Cluster-44281.41396;C…	K00008+K00008+K00008+K00008+K00008+K00008+K00008+K00008+K00008+K00008+K00008+K00008+K00008+K00009+K00009+K00009+K00011+K00844+K00844+K00844+K00844+K00844+K00844+K00844+K00844+K00844+K00847+K00847+K00847+K00847+K00847+K00850+K00850+K00850+K00850+K00850+K00850+K00850+K00850+K00850+K00850+K00850+K00850+K00850+K00850+K00850+K00863+K00895+K00895+K00895+K00895+K00895+K00966+K00966+K00966+K00966+K00966+…		Fructose and mannose metabolism	ko00051	92 out of 6519 1.41125939561282%	683 out of 58977 1.15807857300304%	0.0271552	1	Cluster-44281.21608;Cluster-44281.21609;Cluster-44281.76775;Cluster-44281.76776;Cluster-44281.76777;Cluster-44281.76961;Cluster-44281.86490;Cluster-44281.115798;Cluster-44281.144295;Cluster-44281.38779;Cluster-44281.41396;Cluster-44281.56088;Cluster-44281.92007;Cluster-62868.0;Cluster-44281.48692;Cluster-44281.66722;Cluster-44281.77707;Cluster-44281.84218;Cluster-44281.88765;Cluster-44281.118402;…	K00008+K00008+K00008+K00008+K00008+K00008+K00008+K00009+K00009+K00844+K00844+K00844+K00844+K00844+K00847+K00847+K00847+K00847+K00847+K00850+K00850+K00850+K00850+K00850+K00850+K00850+K00850+K00850+K00850+K00850+K00850+K00850+K00850+K00850+K00863+K00895+K00895+K00895+K00895+K00895+K00895+K00895+K00966+K00966+K00966+K00966+K00966+K00966+K00966+K01103+K01623+K01623+K01623+K01623+K01623+K01623+K01623+…
Glycosphingolipid biosynthesis - ganglio series	ko00604	10 out of 3435 0.291120815138282%	142 out of 58977 0.24077182630517%	0.314454	1	Cluster-44281.41880;Cluster-44281.100144;Cluster-44281.120515;Cluster-44281.62955;Cluster-44281.77181;Cluster-44281.82095;Cluster-44281.84117;Cluster-44281.95618;Cluster-44281.40783;Cluster-44281.8805	K03368+K12309+K12309+K12309+K12309+K12309+K12309+K12309+K12373+K12373		Isoquinoline alkaloid biosynthesis	ko00950	61 out of 8252 0.739214735821619%	351 out of 58977 0.595147260796582%	0.0423906	1	Cluster-44281.12532;Cluster-44281.125810;Cluster-44281.126634;Cluster-44281.130448;Cluster-44281.47960;Cluster-44281.58281;Cluster-44281.61740;Cluster-44281.72684;Cluster-44281.79340;Cluster-44281.98497;Cluster-44281.98498;Cluster-44281.98702;Cluster-6970.0;Cluster-44281.133460;Cluster-44281.136511;Cluster-44281.54296;Cluster-44281.87793;Cluster-75810.1;Cluster-20810.0;Cluster-32406.0;Cluster-351…	K00276+K00276+K00276+K00276+K00276+K00276+K00276+K00276+K00276+K00276+K00276+K00276+K00276+K00422+K00422+K00422+K00422+K00422+K00505+K00505+K00505+K00505+K00505+K00505+K00505+K00505+K00505+K00505+K00815+K00815+K01593+K13390+K13390+K13390+K13390+K13390+K13390+K13395+K14454+K14454+K14454+K14455+K14975+K14975+K14975+K14975+K14975+K14975+K14975+K14975+K14975+K14975+K14975+K14975+K14975+K14975+K14975+…		Fatty acid elongation	ko00062	30 out of 6519 0.460193281178095%	195 out of 58977 0.330637367109212%	0.039132	1	Cluster-44281.109236;Cluster-44281.28695;Cluster-44281.78245;Cluster-44281.97968;Cluster-40426.0;Cluster-44281.77805;Cluster-44281.8682;Cluster-44281.96150;Cluster-51701.0;Cluster-44281.134165;Cluster-44281.37111;Cluster-44281.38581;Cluster-44281.62523;Cluster-44281.62524;Cluster-44281.65371;Cluster-44281.69751;Cluster-44281.96149;Cluster-15350.2;Cluster-44281.104593;Cluster-44281.107345;Cluster-…	K01068+K01074+K07512+K07512+K10246+K10246+K10246+K10246+K10246+K10249+K10249+K10249+K10249+K10249+K10249+K10249+K10249+K15397+K15397+K15397+K15397+K15397+K15397+K15397+K15397+K15397+K15397+K15397+K15397+K15397
Sesquiterpenoid and triterpenoid biosynthesis	ko00909	5 out of 3435 0.145560407569141%	65 out of 58977 0.110212455703071%	0.328038	1	Cluster-69963.0;Cluster-44281.6975;Cluster-75601.0;Cluster-44281.102471;Cluster-44281.30892	K00801+K14173+K14173+K15803+K15803		Glycerolipid metabolism	ko00561	167 out of 8252 2.02375181774115%	1052 out of 58977 1.78374620614816%	0.0434529	1	Cluster-44281.101432;Cluster-44281.106550;Cluster-44281.106965;Cluster-44281.116006;Cluster-44281.122310;Cluster-44281.127884;Cluster-44281.128135;Cluster-44281.130302;Cluster-44281.19097;Cluster-44281.337;Cluster-44281.37743;Cluster-44281.41080;Cluster-44281.49449;Cluster-44281.50056;Cluster-44281.51626;Cluster-44281.52902;Cluster-44281.58273;Cluster-44281.58274;Cluster-44281.66130;Cluster-44281…	K00002+K00002+K00002+K00002+K00002+K00002+K00002+K00002+K00002+K00002+K00002+K00002+K00002+K00002+K00002+K00002+K00002+K00002+K00002+K00002+K00002+K00002+K00002+K00002+K00002+K00002+K00002+K00002+K00002+K00002+K00002+K00002+K00002+K00011+K00128+K00128+K00128+K00128+K00128+K00128+K00128+K00128+K00128+K00128+K00128+K00128+K00128+K00128+K00128+K00128+K00128+K00128+K00128+K00128+K00128+K00655+K00679+…		Fatty acid degradation	ko00071	110 out of 6519 1.68737536431968%	851 out of 58977 1.44293538158943%	0.0468979	1	Cluster-44281.115133;Cluster-44281.115134;Cluster-56640.0;Cluster-42540.0;Cluster-44281.136475;Cluster-44281.136477;Cluster-44281.136480;Cluster-44281.139026;Cluster-44281.30131;Cluster-44281.44019;Cluster-44281.44022;Cluster-44281.54180;Cluster-44281.67138;Cluster-44281.71345;Cluster-27555.0;Cluster-34900.0;Cluster-44281.114692;Cluster-44281.1945;Cluster-44281.33027;Cluster-44281.38718;Cluster-4…	K00001+K00001+K00001+K00121+K00121+K00121+K00121+K00121+K00121+K00121+K00121+K00121+K00121+K00121+K00128+K00128+K00128+K00128+K00128+K00128+K00128+K00128+K00128+K00128+K00128+K00128+K00128+K00128+K00128+K00232+K00232+K00249+K00626+K01897+K01897+K01897+K01897+K01897+K01897+K01897+K01897+K01897+K01897+K01897+K07425+K07425+K07513+K07513+K07513+K07513+K07513+K07513+K07513+K07513+K07513+K07513+K07513+…
Glycine, serine and threonine metabolism	ko00260	54 out of 3435 1.57205240174672%	880 out of 58977 1.49210709259542%	0.365359	1	Cluster-44281.70201;Cluster-44281.12680;Cluster-44281.143687;Cluster-44281.19036;Cluster-44281.37144;Cluster-44281.130448;Cluster-44281.68988;Cluster-44281.86483;Cluster-44281.95481;Cluster-44281.72662;Cluster-44281.78168;Cluster-44281.79063;Cluster-44281.84582;Cluster-44281.108023;Cluster-44281.115556;Cluster-44281.126216;Cluster-44281.23712;Cluster-44281.38870;Cluster-44281.66056;Cluster-44281.…	K00058+K00108+K00108+K00108+K00133+K00276+K00281+K00281+K00281+K00382+K00382+K00382+K00382+K00600+K00600+K00600+K00600+K00600+K00600+K00600+K00600+K00600+K00600+K00605+K00643+K00643+K00827+K00830+K00831+K00928+K00928+K00928+K00928+K00928+K01079+K01079+K01620+K01620+K01694+K01695+K01696+K01754+K01758+K01758+K01834+K06001+K14085+K14085+K14085+K14085+K14085+K14272+K15633+K15918		Biotin metabolism	ko00780	34 out of 8252 0.41202132816287%	183 out of 58977 0.310290452210184%	0.0499773	1	Cluster-44281.110221;Cluster-44281.118032;Cluster-44281.13638;Cluster-44281.46203;Cluster-44281.47710;Cluster-44281.47712;Cluster-44281.47713;Cluster-44281.48873;Cluster-44281.71237;Cluster-44281.71238;Cluster-44281.71241;Cluster-44281.87603;Cluster-44281.88891;Cluster-57552.0;Cluster-44281.100535;Cluster-44281.104663;Cluster-44281.75980;Cluster-44281.73790;Cluster-44281.104347;Cluster-44281.6572…	K00059+K00059+K00059+K00059+K00059+K00059+K00059+K00059+K00059+K00059+K00059+K00059+K00059+K00059+K00208+K00208+K00652+K01012+K01942+K01942+K01942+K01942+K09458+K09458+K09458+K09458+K09458+K09458+K09458+K09458+K09458+K09458+K19562+K19562		Phosphatidylinositol signaling system	ko04070	88 out of 6519 1.34990029145574%	669 out of 58977 1.13434050562084%	0.0490068	1	Cluster-44281.2365;Cluster-44281.24387;Cluster-44281.78470;Cluster-44281.78931;Cluster-44281.95205;Cluster-46422.0;Cluster-80520.0;Cluster-44281.40713;Cluster-44281.44006;Cluster-44281.67425;Cluster-44281.80624;Cluster-44281.91159;Cluster-44281.939;Cluster-44281.942;Cluster-44281.97008;Cluster-44281.55524;Cluster-44281.102276;Cluster-44281.103159;Cluster-44281.103982;Cluster-44281.74100;Cluster-4…	K00889+K00889+K00889+K00889+K00889+K00889+K00889+K00901+K00901+K00901+K00901+K00901+K00901+K00901+K00901+K00913+K00914+K00914+K00914+K00914+K00915+K00915+K00915+K00915+K00915+K00921+K00921+K00921+K00921+K00921+K00981+K01092+K01092+K01092+K01092+K01099+K01099+K01099+K01099+K01110+K01110+K02183+K02183+K02183+K02183+K02183+K02183+K02183+K02183+K02183+K02183+K02183+K02183+K02183+K02183+K02183+K02183+…
Biotin metabolism	ko00780	12 out of 3435 0.349344978165939%	183 out of 58977 0.310290452210184%	0.378688	1	Cluster-44281.110221;Cluster-44281.118032;Cluster-44281.59627;Cluster-44281.71238;Cluster-44281.92581;Cluster-57552.0;Cluster-44281.99775;Cluster-44281.117676;Cluster-44281.48244;Cluster-44281.53428;Cluster-44281.54022;Cluster-44281.65841	K00059+K00059+K00059+K00059+K00059+K00059+K01942+K09458+K09458+K09458+K09458+K09458		Phosphonate and phosphinate metabolism	ko00440	17 out of 8252 0.206010664081435%	81 out of 58977 0.137341675568442%	0.0544614	1	Cluster-44281.65531;Cluster-44281.79714;Cluster-44281.4434;Cluster-44281.78538;Cluster-44281.79815;Cluster-44281.105173;Cluster-44281.112560;Cluster-44281.126305;Cluster-44281.139808;Cluster-44281.17896;Cluster-44281.41871;Cluster-44281.60481;Cluster-44281.66583;Cluster-44281.66584;Cluster-44281.92163;Cluster-44281.92164;Cluster-44281.92165	K00967+K00967+K00968+K00968+K00968+K00993+K00993+K00993+K00993+K00993+K00993+K00993+K00993+K00993+K00993+K00993+K00993		Cutin, suberine and wax biosynthesis	ko00073	48 out of 6519 0.736309249884952%	348 out of 58977 0.590060532071825%	0.0639966	1	Cluster-31122.0;Cluster-44281.105367;Cluster-44281.105369;Cluster-44281.105370;Cluster-44281.130385;Cluster-44281.135998;Cluster-44281.52893;Cluster-44281.119490;Cluster-44281.86368;Cluster-44281.3743;Cluster-44281.52602;Cluster-44281.60358;Cluster-44281.65523;Cluster-44281.76320;Cluster-44281.79467;Cluster-44281.82586;Cluster-44281.87413;Cluster-44281.94472;Cluster-44281.116838;Cluster-44281.114…	K13356+K13356+K13356+K13356+K13356+K13356+K13356+K13407+K13407+K15400+K15400+K15400+K15400+K15400+K15400+K15400+K15400+K15400+K15402+K15403+K15403+K15403+K15404+K15404+K15404+K15404+K15404+K15406+K15406+K15406+K15406+K17991+K17991+K17991+K17991+K17991+K17991+K17991+K17991+K17991+K20495+K20495+K20495+K20495+K20769+K20769+K20769+K20769
Metabolic pathways	ko01100	1538 out of 3435 44.7743813682678%	26269 out of 58977 44.5410922902148%	0.394998	1	Cluster-56640.0;Cluster-896.0;Cluster-43949.0;Cluster-44281.103806;Cluster-44281.114892;Cluster-44281.127053;Cluster-44281.130302;Cluster-44281.19089;Cluster-44281.337;Cluster-44281.75051;Cluster-44281.76587;Cluster-44281.121370;Cluster-44281.21609;Cluster-44281.22447;Cluster-44281.76776;Cluster-44281.76961;Cluster-44281.86490;Cluster-44281.144295;Cluster-44281.102421;Cluster-44281.54121;Cluster-…	K00001+K00001+K00002+K00002+K00002+K00002+K00002+K00002+K00002+K00002+K00002+K00008+K00008+K00008+K00008+K00008+K00008+K00009+K00010+K00013+K00015+K00015+K00016+K00016+K00020+K00020+K00020+K00020+K00020+K00020+K00021+K00025+K00025+K00026+K00026+K00026+K00026+K00026+K00026+K00029+K00029+K00029+K00029+K00029+K00029+K00030+K00030+K00030+K00030+K00030+K00031+K00031+K00031+K00031+K00031+K00033+K00033+…		Cyanoamino acid metabolism	ko00460	107 out of 8252 1.29665535627727%	660 out of 58977 1.11908031944656%	0.057255	1	Cluster-22889.0;Cluster-44281.107975;Cluster-44281.115556;Cluster-44281.126216;Cluster-44281.23712;Cluster-44281.38870;Cluster-44281.40105;Cluster-44281.43802;Cluster-44281.77803;Cluster-44281.80801;Cluster-44281.87708;Cluster-44281.88637;Cluster-44281.89325;Cluster-44281.93602;Cluster-44281.96177;Cluster-44281.96179;Cluster-63550.1;Cluster-44281.64797;Cluster-37842.0;Cluster-44281.105821;Cluster…	K00600+K00600+K00600+K00600+K00600+K00600+K00600+K00600+K00600+K00600+K00600+K00600+K00600+K00600+K00600+K00600+K00600+K00681+K01188+K01188+K01188+K01188+K01188+K01188+K01188+K01188+K01188+K01188+K01188+K01188+K01188+K01188+K01188+K01188+K01188+K01188+K01188+K01188+K01188+K01188+K01188+K01188+K01188+K01188+K01188+K01188+K01188+K01188+K01188+K01188+K01188+K01188+K01188+K01188+K01188+K01188+K01188+…		Taurine and hypotaurine metabolism	ko00430	19 out of 6519 0.291455744746127%	120 out of 58977 0.203469148990284%	0.0686758	1	Cluster-44281.147354;Cluster-44281.101253;Cluster-44281.113429;Cluster-44281.12755;Cluster-44281.69868;Cluster-44281.75829;Cluster-44281.75833;Cluster-44281.75836;Cluster-44281.75837;Cluster-44281.79210;Cluster-14888.0;Cluster-44281.100157;Cluster-44281.126585;Cluster-44281.30484;Cluster-44281.32497;Cluster-44281.53291;Cluster-44281.97458;Cluster-44281.110905;Cluster-44281.32815	K00925+K01580+K01580+K01580+K01580+K01580+K01580+K01580+K01580+K01580+K10712+K10712+K10712+K10712+K10712+K10712+K10712+K18592+K18592
Fructose and mannose metabolism	ko00051	41 out of 3435 1.19359534206696%	683 out of 58977 1.15807857300304%	0.44369	1	Cluster-44281.121370;Cluster-44281.21609;Cluster-44281.22447;Cluster-44281.76776;Cluster-44281.76961;Cluster-44281.86490;Cluster-44281.144295;Cluster-44281.41396;Cluster-44281.56036;Cluster-44281.53954;Cluster-44281.71127;Cluster-44281.30021;Cluster-44281.58703;Cluster-44281.54904;Cluster-44281.4133;Cluster-44281.7182;Cluster-44281.70513;Cluster-44281.72471;Cluster-44281.73067;Cluster-44281.93855…	K00008+K00008+K00008+K00008+K00008+K00008+K00009+K00844+K00844+K00847+K00847+K00850+K00850+K00895+K00966+K00966+K01623+K01623+K01623+K01623+K01623+K01624+K01624+K01805+K01805+K01805+K03841+K03841+K03841+K03841+K12661+K17742+K17742+K18339+K18339+K18339+K19355+K19355+K19355+K19355+K19355		Tyrosine metabolism	ko00350	100 out of 8252 1.21182743577315%	615 out of 58977 1.04277938857521%	0.0601936	1	Cluster-44281.113887;Cluster-44281.115133;Cluster-44281.115134;Cluster-44281.140179;Cluster-56640.0;Cluster-896.0;Cluster-42540.0;Cluster-44281.128771;Cluster-44281.136475;Cluster-44281.136477;Cluster-44281.136480;Cluster-44281.139026;Cluster-44281.30131;Cluster-44281.44019;Cluster-4862.0;Cluster-44281.12532;Cluster-44281.125810;Cluster-44281.126634;Cluster-44281.130448;Cluster-44281.47960;Cluste…	K00001+K00001+K00001+K00001+K00001+K00001+K00121+K00121+K00121+K00121+K00121+K00121+K00121+K00121+K00121+K00276+K00276+K00276+K00276+K00276+K00276+K00276+K00276+K00276+K00276+K00276+K00276+K00276+K00422+K00422+K00422+K00422+K00422+K00457+K00505+K00505+K00505+K00505+K00505+K00505+K00505+K00505+K00505+K00505+K00545+K00545+K00545+K00545+K00545+K00545+K00545+K00545+K00545+K00545+K00815+K00815+K01555+…		Isoquinoline alkaloid biosynthesis	ko00950	48 out of 6519 0.736309249884952%	351 out of 58977 0.595147260796582%	0.0717809	1	Cluster-44281.110831;Cluster-44281.125810;Cluster-44281.126634;Cluster-44281.130448;Cluster-44281.65441;Cluster-44281.65443;Cluster-44281.72684;Cluster-44281.79340;Cluster-44281.98498;Cluster-44281.98702;Cluster-6970.0;Cluster-44281.136511;Cluster-44281.54296;Cluster-44281.87793;Cluster-75810.1;Cluster-20810.0;Cluster-32406.0;Cluster-35171.1;Cluster-3671.0;Cluster-44281.69869;Cluster-66752.0;Clus…	K00276+K00276+K00276+K00276+K00276+K00276+K00276+K00276+K00276+K00276+K00276+K00422+K00422+K00422+K00422+K00505+K00505+K00505+K00505+K00505+K00505+K00815+K00815+K01593+K01593+K13390+K13390+K13390+K13390+K13390+K14454+K14975+K14975+K14975+K14975+K14975+K14975+K14975+K14975+K14975+K14975+K14975+K14975+K14975+K14975+K14975+K14976+K14976
Ether lipid metabolism	ko00565	14 out of 3435 0.407569141193595%	227 out of 58977 0.384895806839955%	0.451998	1	Cluster-44281.126305;Cluster-44281.17896;Cluster-44281.143514;Cluster-44281.22665;Cluster-44281.72446;Cluster-44281.103994;Cluster-44281.43771;Cluster-44281.55396;Cluster-44281.98512;Cluster-44281.60622;Cluster-44281.112543;Cluster-44281.55797;Cluster-44281.58691;Cluster-44281.105088	K00993+K00993+K01047+K01047+K01047+K01114+K01114+K01114+K01114+K01115+K04628+K13510+K16817+K16860		Sesquiterpenoid and triterpenoid biosynthesis	ko00909	14 out of 8252 0.16965584100824%	65 out of 58977 0.110212455703071%	0.0633971	1	Cluster-44281.19213;Cluster-75519.0;Cluster-69963.0;Cluster-44281.6975;Cluster-75601.0;Cluster-44281.102008;Cluster-44281.30761;Cluster-44281.30892;Cluster-44281.38286;Cluster-44281.42667;Cluster-44281.52175;Cluster-44281.54013;Cluster-44281.75537;Cluster-44281.78735	K00511+K00511+K00801+K14173+K14173+K15803+K15803+K15803+K15803+K15803+K15803+K15803+K15803+K15891		Other types of O-glycan biosynthesis	ko00514	34 out of 6519 0.521552385335174%	243 out of 58977 0.412025026705326%	0.089761	1	Cluster-44281.35097;Cluster-44281.13259;Cluster-44281.22387;Cluster-44281.46756;Cluster-44281.65209;Cluster-44281.65210;Cluster-44281.65213;Cluster-44281.80811;Cluster-44281.81948;Cluster-44281.84774;Cluster-44281.85378;Cluster-44281.88747;Cluster-38642.0;Cluster-44281.102616;Cluster-44281.12525;Cluster-44281.136971;Cluster-44281.53527;Cluster-44281.81097;Cluster-44281.95874;Cluster-44281.107473;…	K00728+K09667+K09667+K09667+K09667+K09667+K09667+K09667+K09667+K09667+K09667+K09667+K13667+K13667+K13667+K13667+K13667+K13667+K13667+K13675+K13675+K13675+K13675+K13675+K13675+K18134+K18134+K18134+K18134+K18134+K18134+K20781+K20781+K20783
Phosphatidylinositol signaling system	ko04070	40 out of 3435 1.16448326055313%	669 out of 58977 1.13434050562084%	0.455171	1	Cluster-23272.0;Cluster-44281.126804;Cluster-44281.134555;Cluster-44281.57773;Cluster-63440.0;Cluster-80520.0;Cluster-44281.48625;Cluster-44281.62442;Cluster-44281.96088;Cluster-44281.55522;Cluster-44281.102276;Cluster-44281.102278;Cluster-44281.144616;Cluster-12002.0;Cluster-44281.108828;Cluster-44281.83034;Cluster-44281.82748;Cluster-44281.93256;Cluster-44281.93257;Cluster-44281.94960;Cluster-4…	K00889+K00889+K00889+K00889+K00889+K00889+K00901+K00901+K00901+K00913+K00914+K00914+K00915+K00921+K00921+K00921+K01092+K01092+K01092+K01092+K01099+K01099+K01099+K01110+K02183+K02183+K02183+K02183+K02183+K02183+K02183+K05857+K10572+K13024+K18081+K20278+K20279+K20279+K20279+K21797		Ether lipid metabolism	ko00565	40 out of 8252 0.484730974309258%	227 out of 58977 0.384895806839955%	0.0721849	1	Cluster-44281.105173;Cluster-44281.112560;Cluster-44281.126305;Cluster-44281.139808;Cluster-44281.17896;Cluster-44281.41871;Cluster-44281.60481;Cluster-44281.66583;Cluster-44281.66584;Cluster-44281.92163;Cluster-44281.92164;Cluster-44281.92165;Cluster-44281.22665;Cluster-44281.54245;Cluster-44281.71796;Cluster-44281.89023;Cluster-44281.9000;Cluster-44281.95239;Cluster-44281.103994;Cluster-44281.4…	K00993+K00993+K00993+K00993+K00993+K00993+K00993+K00993+K00993+K00993+K00993+K00993+K01047+K01047+K01047+K01047+K01047+K01047+K01114+K01114+K01114+K01114+K01114+K01114+K01114+K01115+K01115+K01115+K01115+K01115+K01115+K01115+K01115+K01115+K01115+K04628+K13510+K13519+K16817+K16817		Arachidonic acid metabolism	ko00590	34 out of 6519 0.521552385335174%	257 out of 58977 0.435763094087526%	0.154915	1	Cluster-44281.36157;Cluster-44281.48801;Cluster-44281.49595;Cluster-44281.51919;Cluster-44281.57671;Cluster-44281.84463;Cluster-44281.87420;Cluster-44281.92572;Cluster-44281.143514;Cluster-44281.54245;Cluster-44281.72446;Cluster-44281.80135;Cluster-44281.91303;Cluster-44281.17517;Cluster-44281.77307;Cluster-44281.77308;Cluster-44281.81506;Cluster-44281.54933;Cluster-44281.95077;Cluster-44281.5799…	K00432+K00432+K00432+K00432+K00432+K00432+K00432+K00432+K01047+K01047+K01047+K01047+K01047+K01254+K01832+K01832+K01832+K05309+K05309+K07425+K07425+K08726+K08726+K08726+K08726+K14674+K14674+K15730+K15730+K16817+K16817+K16817+K18592+K18592
Biosynthesis of secondary metabolites - other antibiotics	ko00998	2 out of 3435 0.0582241630276565%	28 out of 58977 0.0474761347643997%	0.491049	1	Cluster-44281.19344;Cluster-44281.59631	K21568+K21568		Riboflavin metabolism	ko00740	43 out of 8252 0.521085797382453%	248 out of 58977 0.420502907913254%	0.0791323	1	Cluster-44281.110213;Cluster-44281.28266;Cluster-44281.59126;Cluster-44281.61792;Cluster-44281.49855;Cluster-71566.0;Cluster-44281.102331;Cluster-44281.104382;Cluster-44281.108476;Cluster-44281.55444;Cluster-44281.57714;Cluster-44281.65487;Cluster-44281.71233;Cluster-44281.71620;Cluster-44281.108720;Cluster-44281.125577;Cluster-44281.38546;Cluster-44281.70000;Cluster-44281.77699;Cluster-44281.847…	K00794+K00794+K00794+K00794+K00953+K01078+K01513+K01513+K01513+K01513+K01513+K01513+K01513+K01513+K11752+K11752+K11752+K11752+K11752+K11752+K14379+K14379+K14379+K14379+K14379+K14379+K14379+K14379+K14379+K14379+K14379+K14379+K14379+K14652+K14652+K20884+K20884+K20884+K20884+K20884+K22912+K22912+K22912		beta-Alanine metabolism	ko00410	82 out of 6519 1.25786163522013%	666 out of 58977 1.12925377689608%	0.163342	1	Cluster-27555.0;Cluster-34900.0;Cluster-44281.114692;Cluster-44281.1945;Cluster-44281.33027;Cluster-44281.38718;Cluster-44281.59177;Cluster-44281.62140;Cluster-44281.67186;Cluster-44281.78109;Cluster-44281.79750;Cluster-44281.81549;Cluster-44281.81635;Cluster-44281.85607;Cluster-73178.3;Cluster-77207.0;Cluster-44281.73438;Cluster-44281.79008;Cluster-44281.110831;Cluster-44281.125810;Cluster-44281…	K00128+K00128+K00128+K00128+K00128+K00128+K00128+K00128+K00128+K00128+K00128+K00128+K00128+K00128+K00128+K00140+K00232+K00232+K00276+K00276+K00276+K00276+K00276+K00276+K00276+K00276+K00276+K00276+K00276+K00797+K01464+K01464+K01580+K01580+K01580+K01580+K01580+K01580+K01580+K01580+K01580+K01918+K05605+K05605+K05605+K12259+K13366+K13366+K13366+K13366+K13366+K13366+K13366+K13366+K13366+K13366+K13366+…
Glyoxylate and dicarboxylate metabolism	ko00630	87 out of 3435 2.53275109170306%	1494 out of 58977 2.53319090492904%	0.516753	1	Cluster-3378.0;Cluster-44281.149315;Cluster-44281.102708;Cluster-44281.142163;Cluster-14746.0;Cluster-44281.106439;Cluster-44281.120101;Cluster-44281.122511;Cluster-44281.60671;Cluster-44281.92087;Cluster-29511.0;Cluster-44281.68988;Cluster-44281.86483;Cluster-44281.95481;Cluster-44281.18284;Cluster-44281.73954;Cluster-44281.72662;Cluster-44281.78168;Cluster-44281.79063;Cluster-44281.84582;Cluste…	K00015+K00015+K00025+K00025+K00026+K00026+K00026+K00026+K00026+K00026+K00122+K00281+K00281+K00281+K00284+K00284+K00382+K00382+K00382+K00382+K00600+K00600+K00600+K00600+K00600+K00600+K00600+K00600+K00600+K00600+K00605+K00626+K00626+K00830+K01433+K01455+K01455+K01455+K01569+K01602+K01602+K01602+K01637+K01637+K01637+K01637+K01638+K01647+K01647+K01647+K01647+K01681+K01681+K01681+K01681+K01681+K01681+…		Fatty acid elongation	ko00062	34 out of 8252 0.41202132816287%	195 out of 58977 0.330637367109212%	0.101733	1	Cluster-44281.109236;Cluster-44281.122000;Cluster-44281.78245;Cluster-16250.0;Cluster-40426.0;Cluster-44281.77805;Cluster-44281.96150;Cluster-51701.0;Cluster-44281.37111;Cluster-44281.38581;Cluster-44281.52876;Cluster-44281.62523;Cluster-44281.62524;Cluster-44281.65371;Cluster-44281.69751;Cluster-44281.96149;Cluster-44281.5589;Cluster-15350.2;Cluster-44281.104593;Cluster-44281.118072;Cluster-4428…	K01068+K01074+K07512+K10246+K10246+K10246+K10246+K10246+K10249+K10249+K10249+K10249+K10249+K10249+K10249+K10249+K10258+K15397+K15397+K15397+K15397+K15397+K15397+K15397+K15397+K15397+K15397+K15397+K15397+K15397+K15397+K15397+K15397+K16339		Arginine and proline metabolism	ko00330	87 out of 6519 1.33456051541648%	714 out of 58977 1.21064143649219%	0.18066	1	Cluster-27555.0;Cluster-34900.0;Cluster-44281.114692;Cluster-44281.1945;Cluster-44281.33027;Cluster-44281.38718;Cluster-44281.59177;Cluster-44281.62140;Cluster-44281.67186;Cluster-44281.78109;Cluster-44281.79750;Cluster-44281.81549;Cluster-44281.81635;Cluster-44281.85607;Cluster-73178.3;Cluster-44281.18450;Cluster-44281.98636;Cluster-44281.61986;Cluster-44281.73128;Cluster-44281.81060;Cluster-437…	K00128+K00128+K00128+K00128+K00128+K00128+K00128+K00128+K00128+K00128+K00128+K00128+K00128+K00128+K00128+K00286+K00294+K00318+K00318+K00318+K00472+K00472+K00472+K00472+K00472+K00472+K00797+K00819+K01259+K01259+K01426+K01426+K01426+K01426+K01426+K01426+K01426+K01426+K01426+K01476+K01476+K01583+K01611+K01611+K12251+K12259+K12657+K12657+K13366+K13366+K13366+K13366+K13366+K13366+K13366+K13366+K13366+…
Mannose type O-glycan biosynthesis	ko00515	2 out of 3435 0.0582241630276565%	30 out of 58977 0.0508672872475711%	0.528182	1	Cluster-44281.12159;Cluster-4610.0	K00728+K00728		beta-Alanine metabolism	ko00410	105 out of 8252 1.2724188075618%	666 out of 58977 1.12925377689608%	0.103187	1	Cluster-31771.0;Cluster-34900.0;Cluster-36458.0;Cluster-44281.114692;Cluster-44281.129550;Cluster-44281.142295;Cluster-44281.1945;Cluster-44281.24669;Cluster-44281.37314;Cluster-44281.38718;Cluster-44281.47642;Cluster-44281.5008;Cluster-44281.59177;Cluster-44281.62140;Cluster-44281.67186;Cluster-44281.77665;Cluster-44281.78109;Cluster-44281.81549;Cluster-44281.85607;Cluster-44281.93660;Cluster-73…	K00128+K00128+K00128+K00128+K00128+K00128+K00128+K00128+K00128+K00128+K00128+K00128+K00128+K00128+K00128+K00128+K00128+K00128+K00128+K00128+K00128+K00140+K00140+K00140+K00207+K00232+K00232+K00232+K00232+K00232+K00232+K00276+K00276+K00276+K00276+K00276+K00276+K00276+K00276+K00276+K00276+K00276+K00276+K00276+K00797+K00797+K00797+K00823+K01431+K01464+K01464+K01578+K01578+K01580+K01580+K01580+K01580+…		Tyrosine metabolism	ko00350	74 out of 6519 1.13514342690597%	615 out of 58977 1.04277938857521%	0.23519	1	Cluster-44281.115133;Cluster-44281.115134;Cluster-56640.0;Cluster-42540.0;Cluster-44281.136475;Cluster-44281.136477;Cluster-44281.136480;Cluster-44281.139026;Cluster-44281.30131;Cluster-44281.44019;Cluster-44281.44022;Cluster-44281.54180;Cluster-44281.67138;Cluster-44281.71345;Cluster-44281.110831;Cluster-44281.125810;Cluster-44281.126634;Cluster-44281.130448;Cluster-44281.65441;Cluster-44281.654…	K00001+K00001+K00001+K00121+K00121+K00121+K00121+K00121+K00121+K00121+K00121+K00121+K00121+K00121+K00276+K00276+K00276+K00276+K00276+K00276+K00276+K00276+K00276+K00276+K00276+K00422+K00422+K00422+K00422+K00457+K00505+K00505+K00505+K00505+K00505+K00505+K00545+K00545+K00545+K00545+K00545+K00545+K00545+K00815+K00815+K01555+K01593+K01593+K01800+K13953+K14454+K18857+K18857+K18857+K18857+K18857+K18857+…
Arachidonic acid metabolism	ko00590	15 out of 3435 0.436681222707424%	257 out of 58977 0.435763094087526%	0.534318	1	Cluster-27347.0;Cluster-44281.9107;Cluster-11110.0;Cluster-44281.143514;Cluster-44281.22665;Cluster-44281.72446;Cluster-44281.131383;Cluster-44281.84709;Cluster-44281.46979;Cluster-44281.51258;Cluster-44281.59281;Cluster-44281.92097;Cluster-44281.58691;Cluster-44281.32819;Cluster-77860.0	K00432+K00432+K00461+K01047+K01047+K01047+K01254+K05309+K08726+K08726+K08726+K15730+K16817+K18592+K18592		Carbapenem biosynthesis	ko00332	2 out of 8252 0.0242365487154629%	5 out of 58977 0.00847788120792851%	0.146516	1	Cluster-44281.146811;Cluster-44281.40094	K00147+K00147		Monobactam biosynthesis	ko00261	21 out of 6519 0.322135296824666%	161 out of 58977 0.272987774895298%	0.242557	1	Cluster-44281.107993;Cluster-44281.123805;Cluster-44281.14552;Cluster-44281.18905;Cluster-44281.26635;Cluster-44281.49452;Cluster-44281.79890;Cluster-44281.87381;Cluster-44281.110655;Cluster-44281.32203;Cluster-44281.74092;Cluster-44281.83367;Cluster-44281.83368;Cluster-44281.87119;Cluster-44281.13004;Cluster-44281.77962;Cluster-44281.63390;Cluster-44281.68528;Cluster-44281.74127;Cluster-44281.90…	K00133+K00133+K00133+K00133+K00133+K00133+K00133+K00133+K00928+K00928+K00928+K00928+K00928+K00928+K00958+K12524+K13811+K13811+K13811+K13811+K13811
Biosynthesis of unsaturated fatty acids	ko01040	23 out of 3435 0.66957787481805%	399 out of 58977 0.676534920392695%	0.550835	1	Cluster-44281.73438;Cluster-32116.0;Cluster-32116.1;Cluster-32116.2;Cluster-32116.7;Cluster-44281.116;Cluster-44281.116273;Cluster-44281.141875;Cluster-44281.32435;Cluster-44281.50933;Cluster-44281.41900;Cluster-44281.52846;Cluster-44281.68906;Cluster-44281.72037;Cluster-44281.84593;Cluster-44281.86744;Cluster-44281.94435;Cluster-51576.0;Cluster-44281.8682;Cluster-44281.134165;Cluster-17759.0;Clu…	K00232+K00507+K00507+K00507+K00507+K00507+K00507+K00507+K00507+K00507+K07513+K07513+K07513+K07513+K07513+K07513+K07513+K07513+K10246+K10249+K10256+K10256+K10256		Betalain biosynthesis	ko00965	31 out of 8252 0.375666505089675%	189 out of 58977 0.320463909659698%	0.195181	1	Cluster-20810.0;Cluster-32406.0;Cluster-35171.1;Cluster-3671.0;Cluster-44281.126844;Cluster-44281.1751;Cluster-44281.69869;Cluster-55608.0;Cluster-64494.0;Cluster-66752.0;Cluster-44281.106316;Cluster-44281.109862;Cluster-44281.109863;Cluster-44281.121308;Cluster-44281.122724;Cluster-44281.24831;Cluster-44281.52607;Cluster-44281.60243;Cluster-44281.90310;Cluster-44281.92389;Cluster-44281.11121;Clu…	K00505+K00505+K00505+K00505+K00505+K00505+K00505+K00505+K00505+K00505+K00545+K00545+K00545+K00545+K00545+K00545+K00545+K00545+K00545+K00545+K01593+K15777+K15777+K15777+K15777+K15777+K15777+K15777+K15777+K15777+K15777		Glucosinolate biosynthesis	ko00966	4 out of 6519 0.0613591041570793%	23 out of 58977 0.0389982535564712%	0.24524	1	Cluster-44281.144588;Cluster-44281.38872;Cluster-44281.38873;Cluster-44281.45144	K11820+K11820+K11820+K22321
Glycosphingolipid biosynthesis - globo and isoglobo series	ko00603	11 out of 3435 0.320232896652111%	190 out of 58977 0.322159485901284%	0.551999	1	Cluster-44281.41880;Cluster-44281.102996;Cluster-44281.106027;Cluster-44281.31000;Cluster-44281.74091;Cluster-44281.79399;Cluster-44281.80021;Cluster-44281.83649;Cluster-44281.84046;Cluster-44281.40783;Cluster-44281.8805	K03368+K07407+K07407+K07407+K07407+K07407+K07407+K07407+K07407+K12373+K12373		Glycosylphosphatidylinositol (GPI)-anchor biosynthesis	ko00563	39 out of 8252 0.472612699951527%	246 out of 58977 0.417111755430083%	0.223309	1	Cluster-44281.109849;Cluster-44281.115067;Cluster-44281.140782;Cluster-44281.129965;Cluster-36191.0;Cluster-44281.122718;Cluster-44281.40695;Cluster-44281.50582;Cluster-44281.50584;Cluster-44281.53274;Cluster-44281.5650;Cluster-44281.59000;Cluster-44281.63076;Cluster-44281.63753;Cluster-44281.69619;Cluster-44281.71900;Cluster-44281.72341;Cluster-44281.75645;Cluster-44281.78734;Cluster-44281.7897;…	K03857+K03857+K03858+K03859+K03860+K03860+K03860+K03860+K03860+K03860+K03860+K03860+K03860+K03860+K03860+K03860+K03860+K03860+K03860+K03860+K03860+K03860+K03861+K05284+K05285+K05287+K05287+K05287+K05287+K05287+K05288+K05288+K05288+K05288+K05290+K05291+K05293+K05310+K07542		Proteasome	ko03050	66 out of 6519 1.01242521859181%	550 out of 58977 0.932566932872137%	0.256828	1	Cluster-30160.0;Cluster-75677.0;Cluster-44281.103766;Cluster-44281.130241;Cluster-44281.138843;Cluster-44281.62458;Cluster-11674.0;Cluster-44281.128830;Cluster-44281.129300;Cluster-44281.39027;Cluster-44281.53985;Cluster-44281.62874;Cluster-44281.69154;Cluster-44281.41687;Cluster-44281.41688;Cluster-44281.55727;Cluster-44281.142417;Cluster-44281.65124;Cluster-44281.65127;Cluster-44281.68375;Clust…	K02725+K02730+K02732+K03028+K03028+K03028+K03029+K03029+K03029+K03029+K03029+K03029+K03029+K03030+K03030+K03030+K03032+K03032+K03032+K03032+K03033+K03033+K03036+K03036+K03038+K03039+K03039+K03061+K03061+K03062+K03062+K03063+K03063+K03063+K03063+K03063+K03063+K03063+K03063+K03063+K03063+K03063+K03063+K03063+K03063+K03063+K03063+K03063+K03063+K03064+K03066+K06691+K06691+K06691+K06699+K06699+K06699+…
Taurine and hypotaurine metabolism	ko00430	7 out of 3435 0.203784570596798%	120 out of 58977 0.203469148990284%	0.553264	1	Cluster-44281.34108;Cluster-14888.0;Cluster-24132.0;Cluster-44281.100157;Cluster-44281.97458;Cluster-44281.32819;Cluster-77860.0	K01580+K10712+K10712+K10712+K10712+K18592+K18592		Biosynthesis of unsaturated fatty acids	ko01040	61 out of 8252 0.739214735821619%	399 out of 58977 0.676534920392695%	0.246402	1	Cluster-44281.112041;Cluster-44281.131306;Cluster-44281.38775;Cluster-44281.57487;Cluster-44281.73438;Cluster-44281.79008;Cluster-32116.0;Cluster-32116.1;Cluster-32116.2;Cluster-32116.7;Cluster-41694.1;Cluster-44281.122356;Cluster-44281.122357;Cluster-44281.141875;Cluster-44281.32435;Cluster-44281.50933;Cluster-44281.109236;Cluster-44281.100681;Cluster-44281.75593;Cluster-44281.75594;Cluster-4428…	K00232+K00232+K00232+K00232+K00232+K00232+K00507+K00507+K00507+K00507+K00507+K00507+K00507+K00507+K00507+K00507+K01068+K03921+K03921+K03921+K03921+K07513+K07513+K07513+K07513+K07513+K07513+K07513+K07513+K07513+K07513+K07513+K07513+K07513+K07513+K07513+K07513+K08764+K10246+K10246+K10246+K10246+K10246+K10249+K10249+K10249+K10249+K10249+K10249+K10249+K10249+K10256+K10256+K10256+K10256+K10256+K10256+…		Thiamine metabolism	ko00730	27 out of 6519 0.414173953060285%	215 out of 58977 0.364548891940926%	0.269604	1	Cluster-44281.114195;Cluster-44281.121426;Cluster-44281.147028;Cluster-44281.73532;Cluster-44281.83655;Cluster-74400.0;Cluster-44281.43769;Cluster-44281.129842;Cluster-44281.57334;Cluster-44281.60689;Cluster-44281.62455;Cluster-44281.69905;Cluster-44281.69906;Cluster-44281.69907;Cluster-44281.73293;Cluster-44281.112154;Cluster-44281.71673;Cluster-44281.71679;Cluster-73369.0;Cluster-80699.0;Cluste…	K00939+K00939+K00939+K00939+K00939+K00939+K00949+K01662+K01662+K01662+K01662+K01662+K01662+K01662+K01662+K03146+K03146+K03146+K03146+K03146+K03147+K03147+K03147+K03147+K14153+K20896+K22911
Lysine degradation	ko00310	32 out of 3435 0.931586608442504%	559 out of 58977 0.947827119046408%	0.566099	1	Cluster-31771.0;Cluster-44281.129550;Cluster-44281.142295;Cluster-44281.24669;Cluster-44281.37314;Cluster-44281.56577;Cluster-44281.93660;Cluster-44281.72662;Cluster-44281.78168;Cluster-44281.79063;Cluster-44281.84582;Cluster-44281.146243;Cluster-44281.95615;Cluster-44281.141893;Cluster-44281.13104;Cluster-53111.0;Cluster-44281.45251;Cluster-44281.63617;Cluster-44281.64487;Cluster-44281.68498;Clu…	K00128+K00128+K00128+K00128+K00128+K00128+K00128+K00382+K00382+K00382+K00382+K00626+K00626+K00658+K11419+K11419+K11422+K11422+K11422+K11422+K11423+K11423+K11430+K14085+K14085+K14085+K14085+K14085+K18826+K19199+K19199+K19199		Glycosphingolipid biosynthesis - ganglio series	ko00604	22 out of 8252 0.266602035870092%	142 out of 58977 0.24077182630517%	0.337481	1	Cluster-44281.41877;Cluster-44281.41880;Cluster-44281.100144;Cluster-44281.115628;Cluster-44281.122350;Cluster-44281.13236;Cluster-44281.139103;Cluster-44281.62954;Cluster-44281.62955;Cluster-44281.77181;Cluster-44281.82150;Cluster-44281.84117;Cluster-44281.87873;Cluster-44281.95618;Cluster-44281.95623;Cluster-44281.96861;Cluster-19680.0;Cluster-44281.100061;Cluster-44281.114013;Cluster-44281.155…	K03368+K03368+K12309+K12309+K12309+K12309+K12309+K12309+K12309+K12309+K12309+K12309+K12309+K12309+K12309+K12309+K12373+K12373+K12373+K12373+K12373+K12373		Glutathione metabolism	ko00480	92 out of 6519 1.41125939561282%	782 out of 58977 1.32594062092002%	0.277351	1	Cluster-44281.138911;Cluster-44281.68097;Cluster-44281.10789;Cluster-44281.36955;Cluster-44281.74905;Cluster-44281.74906;Cluster-44281.74911;Cluster-44281.96444;Cluster-44281.103784;Cluster-44281.115750;Cluster-44281.135319;Cluster-44281.59027;Cluster-44281.60786;Cluster-44281.73103;Cluster-44281.80195;Cluster-44281.84168;Cluster-44281.87583;Cluster-44281.94208;Cluster-44281.65072;Cluster-44281.3…	K00031+K00031+K00033+K00033+K00033+K00033+K00033+K00033+K00036+K00036+K00036+K00036+K00036+K00036+K00036+K00036+K00036+K00036+K00383+K00432+K00432+K00432+K00432+K00432+K00432+K00432+K00432+K00434+K00434+K00434+K00434+K00434+K00434+K00797+K00799+K00799+K00799+K00799+K00799+K00799+K00799+K00799+K00799+K00799+K00799+K00799+K00799+K00799+K00799+K00799+K00799+K00799+K00799+K00799+K00799+K00799+K00799+…
Histidine metabolism	ko00340	14 out of 3435 0.407569141193595%	248 out of 58977 0.420502907913254%	0.586558	1	Cluster-44281.54121;Cluster-31771.0;Cluster-44281.129550;Cluster-44281.142295;Cluster-44281.24669;Cluster-44281.37314;Cluster-44281.56577;Cluster-44281.93660;Cluster-44281.84970;Cluster-44281.56348;Cluster-44281.74453;Cluster-44281.76153;Cluster-44281.76154;Cluster-44281.81317	K00013+K00128+K00128+K00128+K00128+K00128+K00128+K00128+K01814+K14085+K14085+K14085+K14085+K14085		Stilbenoid, diarylheptanoid and gingerol biosynthesis	ko00945	20 out of 8252 0.242365487154629%	129 out of 58977 0.218729335164556%	0.346586	1	Cluster-44281.67456;Cluster-44281.71821;Cluster-44281.83522;Cluster-44281.34192;Cluster-44281.65880;Cluster-44281.73529;Cluster-44281.75509;Cluster-44281.129088;Cluster-44281.23083;Cluster-44281.34062;Cluster-44281.72734;Cluster-44281.81101;Cluster-44281.122237;Cluster-44281.122241;Cluster-44281.122242;Cluster-44281.30462;Cluster-44281.61618;Cluster-44281.90865;Cluster-44281.91465;Cluster-77189.0	K00487+K00487+K00487+K00588+K00588+K00588+K00588+K09754+K09754+K09754+K09754+K09754+K13065+K13065+K13065+K13065+K13065+K13065+K13065+K13065		Pentose phosphate pathway	ko00030	75 out of 6519 1.15048320294524%	640 out of 58977 1.08516879461485%	0.312528	1	Cluster-44281.10789;Cluster-44281.36955;Cluster-44281.74905;Cluster-44281.74906;Cluster-44281.74911;Cluster-44281.96444;Cluster-44281.103784;Cluster-44281.115750;Cluster-44281.135319;Cluster-44281.59027;Cluster-44281.60786;Cluster-44281.73103;Cluster-44281.80195;Cluster-44281.84168;Cluster-44281.87583;Cluster-44281.94208;Cluster-44281.57389;Cluster-44281.80530;Cluster-44281.39848;Cluster-44281.70…	K00033+K00033+K00033+K00033+K00033+K00033+K00036+K00036+K00036+K00036+K00036+K00036+K00036+K00036+K00036+K00036+K00131+K00131+K00615+K00615+K00615+K00616+K00616+K00616+K00616+K00850+K00850+K00850+K00850+K00850+K00850+K00850+K00850+K00850+K00850+K00850+K00850+K00850+K00850+K00850+K00895+K00895+K00895+K00895+K00895+K00895+K00895+K00948+K00948+K01057+K01623+K01623+K01623+K01623+K01623+K01623+K01623+…
Indole alkaloid biosynthesis	ko00901	5 out of 3435 0.145560407569141%	88 out of 58977 0.149210709259542%	0.587156	1	Cluster-44281.22913;Cluster-44281.35726;Cluster-44281.35727;Cluster-44281.392;Cluster-46462.0	K21026+K21026+K21026+K21026+K21026		Nitrogen metabolism	ko00910	54 out of 8252 0.654386815317499%	365 out of 58977 0.618885328178782%	0.350809	1	Cluster-44281.28890;Cluster-44281.52683;Cluster-44281.97416;Cluster-44281.99432;Cluster-44281.86942;Cluster-44281.98080;Cluster-64421.0;Cluster-44281.46900;Cluster-44281.5543;Cluster-44281.5544;Cluster-44281.87686;Cluster-44281.88037;Cluster-44281.116717;Cluster-44281.43911;Cluster-44281.103832;Cluster-44281.53763;Cluster-44281.34336;Cluster-44281.44931;Cluster-44281.52057;Cluster-44281.56372;Clu…	K00261+K00261+K00261+K00261+K00262+K00262+K00262+K00264+K00264+K00264+K00264+K00264+K00366+K00366+K01455+K01455+K01673+K01673+K01673+K01673+K01673+K01673+K01673+K01673+K01674+K01674+K01674+K01674+K01674+K01674+K01674+K01674+K01674+K01674+K01674+K01674+K01725+K01915+K01915+K01915+K01915+K01915+K01915+K01915+K01915+K01915+K01915+K01915+K01915+K02575+K02575+K02575+K10534+K10534		Folate biosynthesis	ko00790	30 out of 6519 0.460193281178095%	252 out of 58977 0.427285212879597%	0.361603	1	Cluster-26165.0;Cluster-44281.148948;Cluster-44281.21366;Cluster-44281.62688;Cluster-44281.74133;Cluster-44281.55139;Cluster-44281.116295;Cluster-44281.138597;Cluster-44281.15580;Cluster-44281.108879;Cluster-44281.135892;Cluster-44281.22554;Cluster-44281.60825;Cluster-44281.80391;Cluster-44281.106618;Cluster-44281.61284;Cluster-44281.127463;Cluster-44281.50296;Cluster-44281.7737;Cluster-44281.881…	K01113+K01113+K01113+K01307+K01307+K01495+K01633+K01633+K01724+K01930+K01930+K01930+K01930+K01930+K13941+K13941+K13950+K13950+K13950+K13950+K14652+K14652+K14652+K14652+K14652+K15631+K15631+K15631+K15631+K18482
Proteasome	ko03050	31 out of 3435 0.902474526928675%	550 out of 58977 0.932566932872137%	0.600975	1	Cluster-30160.0;Cluster-44281.74374;Cluster-44281.53253;Cluster-30010.0;Cluster-44281.87689;Cluster-44281.68650;Cluster-44281.62874;Cluster-44281.67104;Cluster-44281.68375;Cluster-44281.74024;Cluster-44281.95973;Cluster-44281.96796;Cluster-44281.72941;Cluster-22066.0;Cluster-44281.101655;Cluster-44281.27009;Cluster-44281.41193;Cluster-44281.5462;Cluster-44281.54766;Cluster-44281.61626;Cluster-442…	K02725+K02725+K02727+K02732+K02739+K03028+K03029+K03029+K03032+K03033+K03033+K03039+K03062+K03063+K03063+K03063+K03063+K03063+K03063+K03063+K03063+K03063+K03063+K03063+K03064+K06691+K06699+K06699+K06699+K06699+K06700		Biosynthesis of secondary metabolites - other antibiotics	ko00998	5 out of 8252 0.0605913717886573%	28 out of 58977 0.0474761347643997%	0.353448	1	Cluster-44281.105876;Cluster-44281.119622;Cluster-44281.33069;Cluster-44281.65868;Cluster-44281.80675	K21568+K21568+K21568+K21568+K21568		Base excision repair	ko03410	35 out of 6519 0.536892161374444%	296 out of 58977 0.501890567509368%	0.362324	1	Cluster-44281.91791;Cluster-44281.64692;Cluster-44281.64693;Cluster-44281.85264;Cluster-44281.22008;Cluster-44281.112594;Cluster-44281.132548;Cluster-44281.41995;Cluster-44281.94693;Cluster-44281.2050;Cluster-44281.76325;Cluster-44281.56853;Cluster-44281.104343;Cluster-44281.42529;Cluster-44281.91437;Cluster-44281.34398;Cluster-44281.89906;Cluster-44281.89907;Cluster-44281.117425;Cluster-44281.12…	K01246+K02327+K02327+K02327+K02328+K02335+K02335+K03505+K03505+K03575+K03575+K03660+K04799+K10563+K10563+K10747+K10747+K10747+K10773+K10773+K10773+K10773+K10773+K10773+K10773+K10773+K10773+K10773+K10798+K10798+K10798+K10798+K10798+K10802+K10803
Fatty acid degradation	ko00071	48 out of 3435 1.39737991266376%	851 out of 58977 1.44293538158943%	0.612218	1	Cluster-56640.0;Cluster-896.0;Cluster-42540.0;Cluster-44281.128771;Cluster-44281.44023;Cluster-4862.0;Cluster-31771.0;Cluster-44281.129550;Cluster-44281.142295;Cluster-44281.24669;Cluster-44281.37314;Cluster-44281.56577;Cluster-44281.93660;Cluster-44281.73438;Cluster-37727.0;Cluster-44281.36182;Cluster-44281.146243;Cluster-44281.95615;Cluster-44281.49890;Cluster-44281.76734;Cluster-44281.96470;Cl…	K00001+K00001+K00121+K00121+K00121+K00121+K00128+K00128+K00128+K00128+K00128+K00128+K00128+K00232+K00249+K00249+K00626+K00626+K01897+K01897+K01897+K07513+K07513+K07513+K07513+K07513+K07513+K07513+K07513+K07517+K10527+K10527+K10527+K10527+K10527+K13953+K13953+K14085+K14085+K14085+K14085+K14085+K18857+K18857+K18857+K18857+K18857+K20495		Selenocompound metabolism	ko00450	50 out of 8252 0.605913717886573%	338 out of 58977 0.573104769655968%	0.35815	1	Cluster-27313.0;Cluster-28855.1;Cluster-39189.0;Cluster-44281.121844;Cluster-44281.71982;Cluster-7968.0;Cluster-44281.109091;Cluster-44281.110261;Cluster-44281.11308;Cluster-44281.17098;Cluster-44281.23703;Cluster-44281.49814;Cluster-44281.68920;Cluster-44281.68922;Cluster-44281.71664;Cluster-44281.75034;Cluster-44281.78856;Cluster-44281.79287;Cluster-44281.79288;Cluster-44281.80715;Cluster-44281…	K00384+K00384+K00384+K00384+K00384+K00384+K00549+K00549+K00549+K00549+K00549+K00549+K00549+K00549+K00549+K00549+K00549+K00549+K00549+K00549+K00549+K00549+K00549+K00549+K00549+K00549+K00816+K00816+K00816+K00958+K01758+K01758+K01760+K01760+K01761+K01761+K01761+K01874+K01874+K01874+K11717+K11717+K11717+K11717+K13811+K13811+K13811+K13811+K13811+K13811		Biotin metabolism	ko00780	22 out of 6519 0.337475072863936%	183 out of 58977 0.310290452210184%	0.371476	1	Cluster-44281.46203;Cluster-44281.47710;Cluster-44281.47712;Cluster-44281.48873;Cluster-44281.71238;Cluster-44281.71239;Cluster-44281.71241;Cluster-44281.87603;Cluster-44281.92581;Cluster-44281.104663;Cluster-44281.73790;Cluster-44281.99774;Cluster-44281.99775;Cluster-44281.99776;Cluster-44281.144065;Cluster-44281.45638;Cluster-44281.48244;Cluster-44281.53428;Cluster-44281.55869;Cluster-44281.703…	K00059+K00059+K00059+K00059+K00059+K00059+K00059+K00059+K00059+K00208+K01012+K01942+K01942+K01942+K09458+K09458+K09458+K09458+K09458+K09458+K09458+K09458
Arginine and proline metabolism	ko00330	40 out of 3435 1.16448326055313%	714 out of 58977 1.21064143649219%	0.623445	1	Cluster-31771.0;Cluster-44281.129550;Cluster-44281.142295;Cluster-44281.24669;Cluster-44281.37314;Cluster-44281.56577;Cluster-44281.93660;Cluster-44281.68269;Cluster-44281.38277;Cluster-44281.50804;Cluster-44281.91624;Cluster-44281.47581;Cluster-38307.0;Cluster-44281.47739;Cluster-44281.88715;Cluster-44281.7595;Cluster-44281.101448;Cluster-44281.4477;Cluster-44281.65037;Cluster-44281.143291;Clust…	K00128+K00128+K00128+K00128+K00128+K00128+K00128+K00318+K00472+K00472+K00472+K00797+K01426+K01426+K01426+K01581+K01583+K01611+K12251+K12657+K13366+K13366+K13366+K13366+K13366+K13366+K13366+K13366+K13366+K13366+K13366+K13366+K13427+K14085+K14085+K14085+K14085+K14085+K17839+K17839		Photosynthesis - antenna proteins	ko00196	16 out of 8252 0.193892389723703%	104 out of 58977 0.176339929124913%	0.382253	1	Cluster-44281.59032;Cluster-44281.67317;Cluster-44281.85175;Cluster-44281.76113;Cluster-44281.79388;Cluster-44281.80270;Cluster-44281.88774;Cluster-44281.81126;Cluster-44281.113941;Cluster-44281.94491;Cluster-44281.79903;Cluster-44281.86592;Cluster-44281.76390;Cluster-44281.70642;Cluster-44281.70643;Cluster-44281.145326	K08907+K08907+K08907+K08908+K08909+K08909+K08909+K08910+K08911+K08911+K08915+K08915+K08916+K08917+K08917+K14172		Indole alkaloid biosynthesis	ko00901	11 out of 6519 0.168737536431968%	88 out of 58977 0.149210709259542%	0.380617	1	Cluster-44281.11121;Cluster-44281.94076;Cluster-44281.141168;Cluster-44281.15133;Cluster-44281.22913;Cluster-44281.35724;Cluster-44281.62270;Cluster-44281.7375;Cluster-44281.93471;Cluster-44281.97711;Cluster-51851.0	K01593+K01593+K21026+K21026+K21026+K21026+K21026+K21026+K21026+K21026+K21026
beta-Alanine metabolism	ko00410	37 out of 3435 1.07714701601164%	666 out of 58977 1.12925377689608%	0.640679	1	Cluster-31771.0;Cluster-44281.129550;Cluster-44281.142295;Cluster-44281.24669;Cluster-44281.37314;Cluster-44281.56577;Cluster-44281.93660;Cluster-44281.68140;Cluster-44281.73438;Cluster-44281.130448;Cluster-44281.47581;Cluster-44281.76992;Cluster-44281.104256;Cluster-44281.119483;Cluster-44281.34108;Cluster-44281.112332;Cluster-44281.113478;Cluster-44281.83154;Cluster-44281.102283;Cluster-44281.1…	K00128+K00128+K00128+K00128+K00128+K00128+K00128+K00207+K00232+K00276+K00797+K01431+K01464+K01578+K01580+K05605+K05605+K05605+K13366+K13366+K13366+K13366+K13366+K13366+K13366+K13366+K13366+K13366+K13366+K13366+K14085+K14085+K14085+K14085+K14085+K17839+K17839		Arachidonic acid metabolism	ko00590	38 out of 8252 0.460494425593795%	257 out of 58977 0.435763094087526%	0.3831	1	Cluster-27347.0;Cluster-44281.36157;Cluster-44281.49595;Cluster-44281.51919;Cluster-44281.70529;Cluster-44281.83965;Cluster-44281.84018;Cluster-44281.84463;Cluster-44281.87420;Cluster-44281.9107;Cluster-44281.92572;Cluster-11110.0;Cluster-44281.22665;Cluster-44281.54245;Cluster-44281.71796;Cluster-44281.89023;Cluster-44281.9000;Cluster-44281.95239;Cluster-44281.101463;Cluster-44281.17517;Cluster-…	K00432+K00432+K00432+K00432+K00432+K00432+K00432+K00432+K00432+K00432+K00432+K00461+K01047+K01047+K01047+K01047+K01047+K01047+K01254+K01254+K01832+K01832+K01832+K01832+K05309+K05309+K07425+K07425+K08726+K08726+K08726+K08726+K16817+K16817+K18592+K18592+K18592+K18592		Phosphonate and phosphinate metabolism	ko00440	10 out of 6519 0.153397760392698%	81 out of 58977 0.137341675568442%	0.405902	1	Cluster-44281.65531;Cluster-44281.78538;Cluster-44281.112560;Cluster-44281.139808;Cluster-44281.60481;Cluster-44281.66583;Cluster-44281.66584;Cluster-44281.92163;Cluster-44281.92164;Cluster-44281.92165	K00967+K00968+K00993+K00993+K00993+K00993+K00993+K00993+K00993+K00993
Vitamin B6 metabolism	ko00750	9 out of 3435 0.262008733624454%	167 out of 58977 0.283161232344812%	0.642029	1	Cluster-44281.114320;Cluster-44281.79411;Cluster-42708.0;Cluster-44281.41093;Cluster-44281.62652;Cluster-44281.73330;Cluster-44281.80882;Cluster-44281.114656;Cluster-44281.91273	K00275+K00831+K05275+K05275+K05275+K05275+K05275+K13248+K13248		Lipoic acid metabolism	ko00785	5 out of 8252 0.0605913717886573%	30 out of 58977 0.0508672872475711%	0.412358	1	Cluster-44281.10158;Cluster-44281.20750;Cluster-44281.99723;Cluster-44281.143954;Cluster-44281.16067	K03644+K03644+K03644+K03801+K03801		Betalain biosynthesis	ko00965	22 out of 6519 0.337475072863936%	189 out of 58977 0.320463909659698%	0.432165	1	Cluster-20810.0;Cluster-32406.0;Cluster-35171.1;Cluster-3671.0;Cluster-44281.69869;Cluster-66752.0;Cluster-44281.106316;Cluster-44281.109862;Cluster-44281.109863;Cluster-44281.121308;Cluster-44281.52607;Cluster-44281.67006;Cluster-44281.92389;Cluster-44281.11121;Cluster-44281.94076;Cluster-44281.117654;Cluster-44281.123553;Cluster-44281.144224;Cluster-44281.53095;Cluster-44281.68179;Cluster-44281…	K00505+K00505+K00505+K00505+K00505+K00505+K00545+K00545+K00545+K00545+K00545+K00545+K00545+K01593+K01593+K15777+K15777+K15777+K15777+K15777+K15777+K15777
Glycosaminoglycan degradation	ko00531	12 out of 3435 0.349344978165939%	224 out of 58977 0.379809078115197%	0.658141	1	Cluster-44281.874;Cluster-44281.105895;Cluster-58760.0;Cluster-44281.100144;Cluster-44281.120515;Cluster-44281.62955;Cluster-44281.77181;Cluster-44281.82095;Cluster-44281.84117;Cluster-44281.95618;Cluster-44281.40783;Cluster-44281.8805	K07964+K10532+K10532+K12309+K12309+K12309+K12309+K12309+K12309+K12309+K12373+K12373		Arginine biosynthesis	ko00220	57 out of 8252 0.690741638390693%	402 out of 58977 0.681621649117453%	0.478659	1	Cluster-44281.80299;Cluster-44281.8483;Cluster-44281.28890;Cluster-44281.52683;Cluster-44281.97416;Cluster-44281.99432;Cluster-44281.86942;Cluster-44281.98080;Cluster-64421.0;Cluster-44281.76092;Cluster-22304.0;Cluster-44281.37299;Cluster-44281.50940;Cluster-44281.9832;Cluster-54125.0;Cluster-44281.89269;Cluster-44281.57126;Cluster-41049.0;Cluster-44281.83026;Cluster-44281.72109;Cluster-44281.124…	K00145+K00145+K00261+K00261+K00261+K00261+K00262+K00262+K00262+K00611+K00814+K00814+K00814+K00818+K00818+K00930+K01438+K01476+K01476+K01755+K01915+K01915+K01915+K01915+K01915+K01915+K01915+K01915+K01915+K01915+K01915+K01915+K01940+K01940+K01940+K01940+K01940+K01940+K01940+K12659+K13427+K14272+K14272+K14454+K14454+K14454+K14455+K14677+K14677+K14677+K14677+K14677+K14677+K14677+K14677+K14682+K14682		Valine, leucine and isoleucine degradation	ko00280	88 out of 6519 1.34990029145574%	793 out of 58977 1.34459195957746%	0.501247	1	Cluster-44281.149896;Cluster-44281.20072;Cluster-44281.35021;Cluster-44281.38480;Cluster-44281.39993;Cluster-44281.44679;Cluster-44281.47182;Cluster-44281.48948;Cluster-44281.51360;Cluster-44281.58115;Cluster-44281.61967;Cluster-44281.62445;Cluster-44281.68563;Cluster-44281.68565;Cluster-44281.70045;Cluster-44281.71379;Cluster-44281.74669;Cluster-44281.75163;Cluster-44281.75164;Cluster-44281.7637…	K00020+K00020+K00020+K00020+K00020+K00020+K00020+K00020+K00020+K00020+K00020+K00020+K00020+K00020+K00020+K00020+K00020+K00020+K00020+K00020+K00020+K00020+K00020+K00128+K00128+K00128+K00128+K00128+K00128+K00128+K00128+K00128+K00128+K00128+K00128+K00128+K00128+K00128+K00140+K00249+K00253+K00253+K00253+K00253+K00253+K00253+K00382+K00382+K00382+K00382+K00382+K00626+K00826+K00826+K00827+K00827+K00827+…
AGE-RAGE signaling pathway in diabetic complications	ko04933	16 out of 3435 0.465793304221252%	297 out of 58977 0.503586143750954%	0.661641	1	Cluster-44281.46977;Cluster-44281.47375;Cluster-44281.47377;Cluster-63736.1;Cluster-1469.0;Cluster-44281.62646;Cluster-44281.127694;Cluster-44281.64716;Cluster-44281.68026;Cluster-44281.82437;Cluster-44281.92046;Cluster-44281.65750;Cluster-33990.0;Cluster-41229.0;Cluster-75749.0;Cluster-75749.1	K04371+K04371+K04371+K04392+K04441+K05857+K06236+K06236+K06236+K06236+K06236+K07827+K08008+K08008+K08008+K08008		Limonene and pinene degradation	ko00903	21 out of 8252 0.254483761512361%	153 out of 58977 0.259423164962613%	0.57328	1	Cluster-31771.0;Cluster-34900.0;Cluster-36458.0;Cluster-44281.114692;Cluster-44281.129550;Cluster-44281.142295;Cluster-44281.1945;Cluster-44281.24669;Cluster-44281.37314;Cluster-44281.38718;Cluster-44281.47642;Cluster-44281.5008;Cluster-44281.59177;Cluster-44281.62140;Cluster-44281.67186;Cluster-44281.77665;Cluster-44281.78109;Cluster-44281.81549;Cluster-44281.85607;Cluster-44281.93660;Cluster-73…	K00128+K00128+K00128+K00128+K00128+K00128+K00128+K00128+K00128+K00128+K00128+K00128+K00128+K00128+K00128+K00128+K00128+K00128+K00128+K00128+K00128		Glycine, serine and threonine metabolism	ko00260	97 out of 6519 1.48795827580917%	880 out of 58977 1.49210709259542%	0.52785	1	Cluster-19927.0;Cluster-44281.122491;Cluster-44281.62098;Cluster-44281.70201;Cluster-44281.102326;Cluster-44281.12680;Cluster-44281.143687;Cluster-44281.25148;Cluster-44281.50893;Cluster-44281.95323;Cluster-44281.107993;Cluster-44281.123805;Cluster-44281.14552;Cluster-44281.18905;Cluster-44281.26635;Cluster-44281.49452;Cluster-44281.79890;Cluster-44281.87381;Cluster-44281.110831;Cluster-44281.125…	K00058+K00058+K00058+K00058+K00108+K00108+K00108+K00108+K00108+K00108+K00133+K00133+K00133+K00133+K00133+K00133+K00133+K00133+K00276+K00276+K00276+K00276+K00276+K00276+K00276+K00276+K00276+K00276+K00276+K00281+K00281+K00281+K00281+K00281+K00306+K00382+K00382+K00382+K00382+K00382+K00600+K00600+K00600+K00600+K00600+K00600+K00600+K00600+K00600+K00600+K00600+K00600+K00600+K00600+K00600+K00600+K00827+…
Other types of O-glycan biosynthesis	ko00514	13 out of 3435 0.378457059679767%	243 out of 58977 0.412025026705326%	0.663115	1	Cluster-44281.12159;Cluster-4610.0;Cluster-44281.148516;Cluster-44281.88747;Cluster-44281.91485;Cluster-44281.138006;Cluster-56424.0;Cluster-44281.75730;Cluster-44281.79023;Cluster-44281.79024;Cluster-44281.81040;Cluster-44281.57835;Cluster-44281.68381	K00728+K00728+K09667+K09667+K09667+K13667+K13667+K13675+K13675+K13675+K13675+K18134+K18134		Porphyrin and chlorophyll metabolism	ko00860	59 out of 8252 0.714978187106156%	430 out of 58977 0.729097783881852%	0.585731	1	Cluster-44281.59567;Cluster-44281.93611;Cluster-28387.0;Cluster-44281.112616;Cluster-44281.43561;Cluster-44281.77301;Cluster-44281.77302;Cluster-44281.59296;Cluster-41549.0;Cluster-44281.8984;Cluster-44281.59325;Cluster-44281.64010;Cluster-44281.115886;Cluster-44281.126268;Cluster-44281.87017;Cluster-44281.97386;Cluster-44281.96323;Cluster-44281.124954;Cluster-44281.107560;Cluster-44281.43404;Clu…	K00218+K00218+K00228+K00228+K00228+K00228+K00228+K00231+K00643+K00643+K01599+K01698+K01772+K01772+K01845+K01885+K02257+K02259+K02303+K02303+K02303+K02303+K02304+K02492+K02492+K02492+K02492+K03405+K08099+K08099+K08099+K08099+K08099+K08099+K13071+K13071+K13071+K13071+K13071+K13544+K13544+K13544+K13544+K13544+K13544+K13544+K13600+K19073+K19073+K19073+K21480+K21480+K21480+K22013+K22013+K22013+K22013+…		Photosynthesis	ko00195	28 out of 6519 0.429513729099555%	260 out of 58977 0.440849822812283%	0.587569	1	Cluster-44281.117684;Cluster-44281.64189;Cluster-44281.130884;Cluster-44281.64912;Cluster-44281.64913;Cluster-44281.108420;Cluster-44281.81102;Cluster-44281.83791;Cluster-44281.86516;Cluster-44281.59205;Cluster-44281.66921;Cluster-44281.85925;Cluster-44281.76855;Cluster-44281.78006;Cluster-44281.116342;Cluster-44281.57974;Cluster-44281.4708;Cluster-44281.80594;Cluster-44281.70344;Cluster-44281.73…	K02115+K02636+K02638+K02639+K02639+K02641+K02641+K02641+K02689+K02693+K02694+K02694+K02695+K02695+K02697+K02698+K02705+K02716+K02721+K02721+K02721+K02724+K03541+K03542+K08901+K08901+K08905+K08906
One carbon pool by folate	ko00670	14 out of 3435 0.407569141193595%	264 out of 58977 0.447632127778626%	0.678785	1	Cluster-44281.122269;Cluster-44281.122142;Cluster-44281.108023;Cluster-44281.115556;Cluster-44281.126216;Cluster-44281.23712;Cluster-44281.38870;Cluster-44281.66056;Cluster-44281.77803;Cluster-44281.86104;Cluster-44281.88637;Cluster-44281.89296;Cluster-44281.71480;Cluster-44281.76847	K00288+K00297+K00600+K00600+K00600+K00600+K00600+K00600+K00600+K00600+K00600+K00600+K00605+K01433		Pentose phosphate pathway	ko00030	88 out of 8252 1.06640814348037%	640 out of 58977 1.08516879461485%	0.587786	1	Cluster-43564.12;Cluster-43564.2;Cluster-43564.7;Cluster-44281.46104;Cluster-44281.74905;Cluster-44281.74906;Cluster-44281.74907;Cluster-44281.115750;Cluster-44281.135319;Cluster-44281.59027;Cluster-44281.60786;Cluster-44281.80195;Cluster-44281.94208;Cluster-44281.98878;Cluster-44281.57389;Cluster-44281.72244;Cluster-44281.93755;Cluster-44281.134149;Cluster-44281.45334;Cluster-44281.70372;Cluster…	K00033+K00033+K00033+K00033+K00033+K00033+K00033+K00036+K00036+K00036+K00036+K00036+K00036+K00036+K00131+K00131+K00131+K00615+K00615+K00615+K00615+K00615+K00616+K00616+K00850+K00850+K00850+K00850+K00850+K00850+K00850+K00850+K00850+K00850+K00850+K00850+K00850+K00850+K00850+K00851+K00895+K00895+K00895+K00895+K00895+K00948+K00948+K00948+K00948+K00948+K01057+K01623+K01623+K01623+K01623+K01623+K01623+…		Ubiquinone and other terpenoid-quinone biosynthesis	ko00130	39 out of 6519 0.598251265531523%	365 out of 58977 0.618885328178782%	0.613824	1	Cluster-44281.104880;Cluster-44281.67456;Cluster-44281.71821;Cluster-44281.83522;Cluster-44281.133977;Cluster-44281.147019;Cluster-44281.104385;Cluster-44281.111830;Cluster-44281.133669;Cluster-44281.38217;Cluster-44281.38219;Cluster-44281.66535;Cluster-44281.70940;Cluster-44281.23106;Cluster-44281.73706;Cluster-44281.108238;Cluster-44281.28790;Cluster-44281.87801;Cluster-44281.87803;Cluster-4428…	K00457+K00487+K00487+K00487+K00815+K00815+K01904+K01904+K01904+K01904+K01904+K01904+K01904+K02552+K03183+K03809+K03809+K03809+K03809+K03809+K03809+K05928+K06125+K06126+K06127+K06127+K09833+K09834+K12501+K12501+K12501+K12501+K12501+K12501+K12502+K14760+K19222+K19222+K19222
Phosphonate and phosphinate metabolism	ko00440	4 out of 3435 0.116448326055313%	81 out of 58977 0.137341675568442%	0.701333	1	Cluster-44281.79714;Cluster-44281.79815;Cluster-44281.126305;Cluster-44281.17896	K00967+K00968+K00993+K00993		Arginine and proline metabolism	ko00330	98 out of 8252 1.18759088705768%	714 out of 58977 1.21064143649219%	0.598241	1	Cluster-31771.0;Cluster-34900.0;Cluster-36458.0;Cluster-44281.114692;Cluster-44281.129550;Cluster-44281.142295;Cluster-44281.1945;Cluster-44281.24669;Cluster-44281.37314;Cluster-44281.38718;Cluster-44281.47642;Cluster-44281.5008;Cluster-44281.59177;Cluster-44281.62140;Cluster-44281.67186;Cluster-44281.77665;Cluster-44281.78109;Cluster-44281.81549;Cluster-44281.85607;Cluster-44281.93660;Cluster-73…	K00128+K00128+K00128+K00128+K00128+K00128+K00128+K00128+K00128+K00128+K00128+K00128+K00128+K00128+K00128+K00128+K00128+K00128+K00128+K00128+K00128+K00147+K00147+K00286+K00318+K00318+K00472+K00472+K00472+K00472+K00472+K00797+K00797+K00797+K00819+K00819+K01259+K01426+K01426+K01426+K01426+K01426+K01426+K01426+K01426+K01426+K01476+K01476+K01480+K01581+K01581+K01581+K01583+K01583+K01583+K01611+K01611+…		Glycosphingolipid biosynthesis - globo and isoglobo series	ko00603	20 out of 6519 0.306795520785397%	190 out of 58977 0.322159485901284%	0.62595	1	Cluster-44281.113571;Cluster-44281.29427;Cluster-44281.29908;Cluster-44281.31430;Cluster-44281.33976;Cluster-44281.49432;Cluster-44281.57829;Cluster-44281.60365;Cluster-44281.74089;Cluster-44281.74091;Cluster-44281.77818;Cluster-44281.78606;Cluster-44281.78971;Cluster-44281.79399;Cluster-44281.84046;Cluster-44281.92539;Cluster-44281.100062;Cluster-44281.15562;Cluster-44281.71032;Cluster-44281.8805	K07407+K07407+K07407+K07407+K07407+K07407+K07407+K07407+K07407+K07407+K07407+K07407+K07407+K07407+K07407+K07407+K12373+K12373+K12373+K12373
Valine, leucine and isoleucine degradation	ko00280	43 out of 3435 1.25181950509461%	793 out of 58977 1.34459195957746%	0.708045	1	Cluster-44281.104094;Cluster-44281.35021;Cluster-44281.39647;Cluster-44281.44679;Cluster-44281.62445;Cluster-44281.68563;Cluster-31771.0;Cluster-44281.129550;Cluster-44281.142295;Cluster-44281.24669;Cluster-44281.37314;Cluster-44281.56577;Cluster-44281.93660;Cluster-37727.0;Cluster-44281.36182;Cluster-44281.63381;Cluster-44281.72662;Cluster-44281.78168;Cluster-44281.79063;Cluster-44281.84582;Clus…	K00020+K00020+K00020+K00020+K00020+K00020+K00128+K00128+K00128+K00128+K00128+K00128+K00128+K00249+K00249+K00253+K00382+K00382+K00382+K00382+K00626+K00626+K00827+K01641+K01641+K01641+K05605+K05605+K05605+K07513+K07513+K07513+K07513+K07513+K07513+K07513+K07513+K09699+K14085+K14085+K14085+K14085+K14085		Thiamine metabolism	ko00730	29 out of 8252 0.351429956374212%	215 out of 58977 0.364548891940926%	0.614149	1	Cluster-44281.76850;Cluster-28371.0;Cluster-44281.114195;Cluster-44281.121426;Cluster-44281.147028;Cluster-44281.83655;Cluster-74400.0;Cluster-44281.90972;Cluster-56886.0;Cluster-71566.0;Cluster-44281.126702;Cluster-44281.129842;Cluster-44281.57334;Cluster-44281.73293;Cluster-44281.112154;Cluster-44281.112508;Cluster-44281.71673;Cluster-44281.71679;Cluster-73369.0;Cluster-80699.0;Cluster-44281.28…	K00878+K00939+K00939+K00939+K00939+K00939+K00939+K00949+K01077+K01078+K01662+K01662+K01662+K01662+K03146+K03146+K03146+K03146+K03146+K03146+K03147+K03147+K03147+K04487+K14153+K20896+K22911+K22911+K22911		Lipoic acid metabolism	ko00785	3 out of 6519 0.0460193281178095%	30 out of 58977 0.0508672872475711%	0.659246	1	Cluster-44281.20750;Cluster-44281.99723;Cluster-44281.143954	K03644+K03644+K03801
Ubiquinone and other terpenoid-quinone biosynthesis	ko00130	19 out of 3435 0.553129548762737%	365 out of 58977 0.618885328178782%	0.725077	1	Cluster-44281.107372;Cluster-44281.147019;Cluster-44281.82044;Cluster-44281.104385;Cluster-44281.111830;Cluster-44281.32703;Cluster-44281.33800;Cluster-44281.38217;Cluster-44281.38219;Cluster-44281.66535;Cluster-44281.68196;Cluster-44281.52367;Cluster-44281.58821;Cluster-44281.26655;Cluster-44281.34225;Cluster-44281.62385;Cluster-44281.141931;Cluster-38350.0;Cluster-44281.63382	K00815+K00815+K01661+K01904+K01904+K01904+K01904+K01904+K01904+K01904+K01904+K03183+K06127+K09833+K12501+K12501+K12502+K19222+K19222		Protein processing in endoplasmic reticulum	ko04141	370 out of 8252 4.48376151236064%	2679 out of 58977 4.5424487512081%	0.617491	1	Cluster-44281.108291;Cluster-44281.57707;Cluster-44281.105515;Cluster-44281.124974;Cluster-44281.26036;Cluster-44281.44513;Cluster-44281.64186;Cluster-44281.122632;Cluster-44281.3395;Cluster-44281.43467;Cluster-56729.0;Cluster-44281.118392;Cluster-44281.68406;Cluster-32320.0;Cluster-30434.0;Cluster-44281.101855;Cluster-44281.10876;Cluster-44281.111044;Cluster-44281.112822;Cluster-44281.116639;Clu…	K01228+K01228+K01230+K01230+K01230+K01230+K01230+K01456+K01456+K01456+K01456+K03094+K03094+K03237+K03283+K03283+K03283+K03283+K03283+K03283+K03283+K03283+K03283+K03283+K03283+K03283+K03283+K03283+K03283+K03283+K03283+K03283+K03283+K03283+K03283+K03283+K03283+K03283+K03283+K03283+K03283+K03283+K03283+K03283+K03283+K03283+K03283+K03283+K03283+K03283+K03283+K03283+K03283+K03283+K03283+K03283+K03283+…		Isoflavonoid biosynthesis	ko00943	1 out of 6519 0.0153397760392698%	10 out of 58977 0.016955762415857%	0.69008	1	Cluster-44281.91198	K13260
Glycerolipid metabolism	ko00561	57 out of 3435 1.65938864628821%	1052 out of 58977 1.78374620614816%	0.733187	1	Cluster-43949.0;Cluster-44281.103806;Cluster-44281.114892;Cluster-44281.127053;Cluster-44281.130302;Cluster-44281.19089;Cluster-44281.337;Cluster-44281.75051;Cluster-44281.76587;Cluster-31771.0;Cluster-44281.129550;Cluster-44281.142295;Cluster-44281.24669;Cluster-44281.37314;Cluster-44281.56577;Cluster-44281.93660;Cluster-40110.0;Cluster-44281.120460;Cluster-44281.133986;Cluster-44281.46834;Clust…	K00002+K00002+K00002+K00002+K00002+K00002+K00002+K00002+K00002+K00128+K00128+K00128+K00128+K00128+K00128+K00128+K00679+K00679+K00679+K00679+K00679+K00679+K00679+K00679+K00679+K00679+K00679+K00901+K00901+K00901+K01054+K01054+K01054+K06118+K07407+K07407+K07407+K07407+K07407+K07407+K07407+K07407+K09480+K13508+K14085+K14085+K14085+K14085+K14085+K14457+K15918+K18693+K18693+K21362+K21362+K21362+K22849		Glycerophospholipid metabolism	ko00564	119 out of 8252 1.44207464857004%	870 out of 58977 1.47515133017956%	0.620804	1	Cluster-44281.51176;Cluster-44281.57237;Cluster-44281.69918;Cluster-44281.1142;Cluster-44281.79229;Cluster-30943.0;Cluster-44281.107783;Cluster-44281.99711;Cluster-44281.40713;Cluster-44281.44729;Cluster-44281.62442;Cluster-44281.67425;Cluster-44281.80624;Cluster-44281.91159;Cluster-44281.939;Cluster-44281.942;Cluster-44281.96088;Cluster-44281.97008;Cluster-44281.65531;Cluster-44281.79714;Cluster…	K00006+K00006+K00006+K00111+K00655+K00894+K00894+K00894+K00901+K00901+K00901+K00901+K00901+K00901+K00901+K00901+K00901+K00901+K00967+K00967+K00968+K00968+K00968+K00981+K00981+K00993+K00993+K00993+K00993+K00993+K00993+K00993+K00993+K00993+K00993+K00993+K00993+K00999+K00999+K00999+K01047+K01047+K01047+K01047+K01047+K01047+K01114+K01114+K01114+K01114+K01114+K01114+K01114+K01115+K01115+K01115+K01115+…		Fatty acid biosynthesis	ko00061	55 out of 6519 0.84368768215984%	527 out of 58977 0.893568679315665%	0.695142	1	Cluster-44281.46203;Cluster-44281.47710;Cluster-44281.47712;Cluster-44281.48873;Cluster-44281.71238;Cluster-44281.71239;Cluster-44281.71241;Cluster-44281.87603;Cluster-44281.92581;Cluster-44281.104663;Cluster-40385.0;Cluster-44281.51749;Cluster-44281.103282;Cluster-74262.0;Cluster-44281.102899;Cluster-44281.18926;Cluster-44281.53661;Cluster-74231.1;Cluster-44281.123445;Cluster-44281.142396;Cluste…	K00059+K00059+K00059+K00059+K00059+K00059+K00059+K00059+K00059+K00208+K00645+K00645+K00665+K00665+K00667+K00667+K00668+K00668+K01897+K01897+K01897+K01897+K01897+K01897+K01897+K01897+K01897+K01897+K01897+K01961+K03921+K03921+K03921+K07512+K07512+K09458+K09458+K09458+K09458+K09458+K09458+K09458+K09458+K10781+K10781+K10781+K10781+K10781+K10781+K10781+K10781+K10782+K11262+K11262+K11262
Protein export	ko03060	18 out of 3435 0.524017467248908%	355 out of 58977 0.601929565762925%	0.759934	1	Cluster-44281.73964;Cluster-44281.79766;Cluster-44281.92903;Cluster-44281.111546;Cluster-44281.34547;Cluster-32614.0;Cluster-44281.113361;Cluster-44281.137253;Cluster-44281.139873;Cluster-44281.48895;Cluster-44281.75222;Cluster-44281.84148;Cluster-44281.89086;Cluster-44281.78845;Cluster-44281.118430;Cluster-5491.0;Cluster-63147.1;Cluster-44281.78630	K03070+K03070+K03070+K03217+K09481+K09490+K09490+K09490+K09490+K09490+K09490+K09490+K09490+K09540+K10956+K10956+K10956+K12947		Vitamin B6 metabolism	ko00750	22 out of 8252 0.266602035870092%	167 out of 58977 0.283161232344812%	0.653353	1	Cluster-44281.104547;Cluster-44281.36056;Cluster-44281.79411;Cluster-44281.70214;Cluster-12044.0;Cluster-42708.0;Cluster-44281.41093;Cluster-44281.46891;Cluster-44281.50142;Cluster-44281.62433;Cluster-44281.62652;Cluster-44281.73140;Cluster-44281.80882;Cluster-44281.82259;Cluster-44281.83;Cluster-44281.89368;Cluster-44281.66492;Cluster-70183.0;Cluster-44281.114656;Cluster-44281.51245;Cluster-4428…	K00275+K00275+K00831+K00868+K01733+K05275+K05275+K05275+K05275+K05275+K05275+K05275+K05275+K05275+K05275+K05275+K06215+K06215+K13248+K13248+K13248+K13248		Glycosylphosphatidylinositol (GPI)-anchor biosynthesis	ko00563	25 out of 6519 0.383494400981746%	246 out of 58977 0.417111755430083%	0.701846	1	Cluster-44281.109849;Cluster-44281.66052;Cluster-44281.78662;Cluster-36191.0;Cluster-44281.122718;Cluster-44281.29838;Cluster-44281.40695;Cluster-44281.40706;Cluster-44281.50582;Cluster-44281.50584;Cluster-44281.53274;Cluster-44281.63753;Cluster-44281.66121;Cluster-44281.69619;Cluster-44281.71900;Cluster-44281.72341;Cluster-44281.78734;Cluster-44281.7897;Cluster-44281.87654;Cluster-46694.0;Cluste…	K03857+K03857+K03857+K03860+K03860+K03860+K03860+K03860+K03860+K03860+K03860+K03860+K03860+K03860+K03860+K03860+K03860+K03860+K03860+K03860+K05284+K05287+K05287+K05288+K05293
Peroxisome	ko04146	58 out of 3435 1.68850072780204%	1085 out of 58977 1.83970022212049%	0.769352	1	Cluster-44281.121113;Cluster-44281.138911;Cluster-44281.66456;Cluster-44281.68097;Cluster-44281.80555;Cluster-44281.73438;Cluster-39255.0;Cluster-44281.107639;Cluster-44281.47355;Cluster-74302.0;Cluster-44281.44339;Cluster-44281.31393;Cluster-44281.119483;Cluster-44281.49890;Cluster-44281.76734;Cluster-44281.96470;Cluster-44281.110862;Cluster-44281.147315;Cluster-81135.2;Cluster-44281.102020;Clus…	K00031+K00031+K00031+K00031+K00031+K00232+K00624+K00624+K00624+K00624+K00830+K00869+K01578+K01897+K01897+K01897+K03426+K03781+K03781+K04564+K04564+K04565+K04565+K07513+K07513+K07513+K07513+K07513+K07513+K07513+K07513+K08726+K08726+K08726+K11147+K11517+K11517+K11517+K13237+K13237+K13237+K13237+K13237+K13237+K13237+K13338+K13339+K13341+K13343+K13345+K13346+K13348+K13348+K13352+K13356+K13356+K13356+…		Monobactam biosynthesis	ko00261	21 out of 8252 0.254483761512361%	161 out of 58977 0.272987774895298%	0.669741	1	Cluster-44281.107993;Cluster-44281.123805;Cluster-44281.14552;Cluster-44281.18905;Cluster-44281.37144;Cluster-44281.79890;Cluster-44281.87381;Cluster-44281.97933;Cluster-44281.26531;Cluster-44281.83367;Cluster-44281.87119;Cluster-44281.13004;Cluster-44281.57889;Cluster-44281.110531;Cluster-44281.98893;Cluster-44281.33061;Cluster-44281.63390;Cluster-44281.68528;Cluster-44281.74127;Cluster-44281.90…	K00133+K00133+K00133+K00133+K00133+K00133+K00133+K00133+K00928+K00928+K00928+K00958+K01714+K12524+K12524+K13811+K13811+K13811+K13811+K13811+K13811		Glycosphingolipid biosynthesis - ganglio series	ko00604	14 out of 6519 0.214756864549778%	142 out of 58977 0.24077182630517%	0.713998	1	Cluster-44281.115628;Cluster-44281.120515;Cluster-44281.122350;Cluster-44281.13236;Cluster-44281.62954;Cluster-44281.62955;Cluster-44281.82095;Cluster-44281.82150;Cluster-44281.95618;Cluster-44281.96861;Cluster-44281.100062;Cluster-44281.15562;Cluster-44281.71032;Cluster-44281.8805	K12309+K12309+K12309+K12309+K12309+K12309+K12309+K12309+K12309+K12309+K12373+K12373+K12373+K12373
Betalain biosynthesis	ko00965	9 out of 3435 0.262008733624454%	189 out of 58977 0.320463909659698%	0.77713	1	Cluster-44281.126844;Cluster-44281.69869;Cluster-44281.121308;Cluster-44281.122724;Cluster-44281.60243;Cluster-44281.101381;Cluster-44281.144224;Cluster-44281.84438;Cluster-44281.85894	K00505+K00505+K00545+K00545+K00545+K15777+K15777+K15777+K15777		Base excision repair	ko03410	39 out of 8252 0.472612699951527%	296 out of 58977 0.501890567509368%	0.682386	1	Cluster-44281.105704;Cluster-44281.41463;Cluster-44281.46692;Cluster-44281.84705;Cluster-44281.90392;Cluster-44281.95988;Cluster-44281.64692;Cluster-44281.64693;Cluster-44281.85264;Cluster-44281.98079;Cluster-44281.30161;Cluster-44281.30170;Cluster-44281.46172;Cluster-44281.46173;Cluster-44281.84758;Cluster-44281.106579;Cluster-44281.112594;Cluster-44281.15524;Cluster-44281.41995;Cluster-44281.94…	K01142+K01142+K01246+K01246+K01246+K01246+K02327+K02327+K02327+K02327+K02328+K02328+K02328+K02328+K02328+K02335+K02335+K02335+K03505+K03505+K03575+K03575+K03575+K03660+K04799+K10563+K10747+K10773+K10773+K10773+K10773+K10773+K10798+K10798+K10798+K10798+K10798+K10802+K10802		Histidine metabolism	ko00340	25 out of 6519 0.383494400981746%	248 out of 58977 0.420502907913254%	0.716937	1	Cluster-27555.0;Cluster-34900.0;Cluster-44281.114692;Cluster-44281.1945;Cluster-44281.33027;Cluster-44281.38718;Cluster-44281.59177;Cluster-44281.62140;Cluster-44281.67186;Cluster-44281.78109;Cluster-44281.79750;Cluster-44281.81549;Cluster-44281.81635;Cluster-44281.85607;Cluster-73178.3;Cluster-44281.47915;Cluster-44281.56892;Cluster-44281.55100;Cluster-44281.56348;Cluster-44281.74453;Cluster-442…	K00128+K00128+K00128+K00128+K00128+K00128+K00128+K00128+K00128+K00128+K00128+K00128+K00128+K00128+K00128+K00765+K01590+K01693+K14085+K14085+K14085+K14085+K14085+K14085+K19787
Caffeine metabolism	ko00232	2 out of 3435 0.0582241630276565%	49 out of 58977 0.0830832358376994%	0.787138	1	Cluster-44281.39661;Cluster-64817.0	K07409+K07409		Fatty acid metabolism	ko01212	138 out of 8252 1.67232186136694%	1023 out of 58977 1.73457449514217%	0.693111	1	Cluster-44281.110221;Cluster-44281.118032;Cluster-44281.13638;Cluster-44281.46203;Cluster-44281.47710;Cluster-44281.47712;Cluster-44281.47713;Cluster-44281.48873;Cluster-44281.71237;Cluster-44281.71238;Cluster-44281.71241;Cluster-44281.87603;Cluster-44281.88891;Cluster-57552.0;Cluster-44281.100535;Cluster-44281.104663;Cluster-44281.112041;Cluster-44281.131306;Cluster-44281.38775;Cluster-44281.574…	K00059+K00059+K00059+K00059+K00059+K00059+K00059+K00059+K00059+K00059+K00059+K00059+K00059+K00059+K00208+K00208+K00232+K00232+K00232+K00232+K00232+K00232+K00249+K00249+K00249+K00507+K00507+K00507+K00507+K00507+K00507+K00507+K00507+K00507+K00507+K00626+K00626+K00626+K00626+K00665+K00665+K00667+K00667+K00668+K01074+K01897+K01897+K01897+K01897+K01897+K01897+K01897+K01897+K01897+K01897+K01897+K01897+…		Other glycan degradation	ko00511	37 out of 6519 0.567571713452984%	363 out of 58977 0.61549417569561%	0.724	1	Cluster-44281.24708;Cluster-44281.102938;Cluster-44281.112534;Cluster-44281.124525;Cluster-44281.51304;Cluster-44281.80118;Cluster-38674.0;Cluster-44281.130024;Cluster-44281.13267;Cluster-44281.18580;Cluster-44281.19;Cluster-44281.46636;Cluster-44281.46637;Cluster-44281.59946;Cluster-44281.66765;Cluster-44281.69481;Cluster-44281.107309;Cluster-44281.107310;Cluster-44281.115628;Cluster-44281.12051…	K01190+K01191+K01191+K01191+K01191+K01191+K01206+K01206+K01206+K01206+K01206+K01206+K01206+K01206+K01206+K01206+K01227+K01227+K12309+K12309+K12309+K12309+K12309+K12309+K12309+K12309+K12309+K12309+K12373+K12373+K12373+K12373+K15923+K15923+K15923+K15923+K17108
Galactose metabolism	ko00052	48 out of 3435 1.39737991266376%	913 out of 58977 1.54806110856775%	0.788562	1	Cluster-44281.41396;Cluster-44281.56036;Cluster-44281.30021;Cluster-44281.58703;Cluster-44281.129265;Cluster-44281.129266;Cluster-44281.111037;Cluster-44281.31786;Cluster-44281.44970;Cluster-44281.89638;Cluster-44281.90534;Cluster-44281.102004;Cluster-44281.104831;Cluster-44281.115497;Cluster-44281.31476;Cluster-44281.32932;Cluster-44281.44016;Cluster-44281.48535;Cluster-44281.82181;Cluster-44281…	K00844+K00844+K00850+K00850+K00963+K00963+K00965+K01187+K01187+K01187+K01187+K01193+K01193+K01193+K01193+K01193+K01193+K01193+K01193+K01193+K01785+K01835+K06617+K06617+K06617+K06617+K06617+K06617+K06617+K07407+K07407+K07407+K07407+K07407+K07407+K07407+K07407+K12309+K12309+K12309+K12309+K12309+K12309+K12309+K12447+K18819+K18819+K18819		Fatty acid biosynthesis	ko00061	70 out of 8252 0.848279205041202%	527 out of 58977 0.893568679315665%	0.699764	1	Cluster-44281.110221;Cluster-44281.118032;Cluster-44281.13638;Cluster-44281.46203;Cluster-44281.47710;Cluster-44281.47712;Cluster-44281.47713;Cluster-44281.48873;Cluster-44281.71237;Cluster-44281.71238;Cluster-44281.71241;Cluster-44281.87603;Cluster-44281.88891;Cluster-57552.0;Cluster-44281.100535;Cluster-44281.104663;Cluster-44281.103282;Cluster-74262.0;Cluster-44281.102899;Cluster-44281.18926;C…	K00059+K00059+K00059+K00059+K00059+K00059+K00059+K00059+K00059+K00059+K00059+K00059+K00059+K00059+K00208+K00208+K00665+K00665+K00667+K00667+K00668+K01897+K01897+K01897+K01897+K01897+K01897+K01897+K01897+K01897+K01897+K01897+K01897+K01897+K01897+K01897+K01897+K01897+K01961+K01961+K03921+K03921+K03921+K03921+K07512+K09458+K09458+K09458+K09458+K09458+K09458+K09458+K09458+K09458+K09458+K10781+K10781+…		Limonene and pinene degradation	ko00903	15 out of 6519 0.230096640589047%	153 out of 58977 0.259423164962613%	0.726312	1	Cluster-27555.0;Cluster-34900.0;Cluster-44281.114692;Cluster-44281.1945;Cluster-44281.33027;Cluster-44281.38718;Cluster-44281.59177;Cluster-44281.62140;Cluster-44281.67186;Cluster-44281.78109;Cluster-44281.79750;Cluster-44281.81549;Cluster-44281.81635;Cluster-44281.85607;Cluster-73178.3	K00128+K00128+K00128+K00128+K00128+K00128+K00128+K00128+K00128+K00128+K00128+K00128+K00128+K00128+K00128
Other glycan degradation	ko00511	18 out of 3435 0.524017467248908%	363 out of 58977 0.61549417569561%	0.790558	1	Cluster-44281.101223;Cluster-44281.102067;Cluster-44281.108776;Cluster-44281.18306;Cluster-44281.46637;Cluster-44281.47600;Cluster-44281.60343;Cluster-44281.107309;Cluster-44281.118286;Cluster-44281.100144;Cluster-44281.120515;Cluster-44281.62955;Cluster-44281.77181;Cluster-44281.82095;Cluster-44281.84117;Cluster-44281.95618;Cluster-44281.40783;Cluster-44281.8805	K01191+K01206+K01206+K01206+K01206+K01206+K01206+K01227+K01444+K12309+K12309+K12309+K12309+K12309+K12309+K12309+K12373+K12373		Spliceosome	ko03040	351 out of 8252 4.25351429956374%	2578 out of 58977 4.37119555080794%	0.721963	1	Cluster-30434.0;Cluster-44281.101855;Cluster-44281.10876;Cluster-44281.111044;Cluster-44281.112822;Cluster-44281.116639;Cluster-44281.119355;Cluster-44281.120037;Cluster-44281.12090;Cluster-44281.122854;Cluster-44281.126136;Cluster-44281.127776;Cluster-44281.128586;Cluster-44281.13224;Cluster-44281.13826;Cluster-44281.138919;Cluster-44281.140400;Cluster-44281.142486;Cluster-44281.144054;Cluster-4…	K03283+K03283+K03283+K03283+K03283+K03283+K03283+K03283+K03283+K03283+K03283+K03283+K03283+K03283+K03283+K03283+K03283+K03283+K03283+K03283+K03283+K03283+K03283+K03283+K03283+K03283+K03283+K03283+K03283+K03283+K03283+K03283+K03283+K03283+K03283+K03283+K03283+K03283+K03283+K03283+K03283+K03283+K03283+K03283+K03283+K03283+K03283+K03283+K03283+K03283+K03283+K03283+K03283+K03283+K03283+K03283+K03283+…		Nicotinate and nicotinamide metabolism	ko00760	34 out of 6519 0.521552385335174%	338 out of 58977 0.573104769655968%	0.745135	1	Cluster-44281.106303;Cluster-44281.106304;Cluster-44281.115518;Cluster-44281.30937;Cluster-44281.87345;Cluster-44281.94469;Cluster-44281.123113;Cluster-44281.29697;Cluster-44281.35383;Cluster-44281.59760;Cluster-44281.80419;Cluster-16986.0;Cluster-44281.104382;Cluster-44281.108476;Cluster-44281.42251;Cluster-44281.53607;Cluster-44281.55444;Cluster-44281.57714;Cluster-44281.23278;Cluster-44281.422…	K00278+K00278+K00278+K00278+K00278+K00858+K01081+K01081+K01081+K01240+K01240+K01513+K01513+K01513+K01513+K01513+K01513+K01513+K01950+K01950+K01950+K03517+K03783+K03787+K03787+K18550+K18551+K18551+K18551+K18551+K18551+K18551+K18551+K18551
Inositol phosphate metabolism	ko00562	39 out of 3435 1.1353711790393%	751 out of 58977 1.27337775743086%	0.792366	1	Cluster-44281.102421;Cluster-44281.43292;Cluster-65290.9;Cluster-23272.0;Cluster-44281.126804;Cluster-44281.134555;Cluster-44281.57773;Cluster-63440.0;Cluster-80520.0;Cluster-44281.55522;Cluster-44281.102276;Cluster-44281.102278;Cluster-44281.144616;Cluster-12002.0;Cluster-44281.108828;Cluster-44281.83034;Cluster-44281.82748;Cluster-44281.93256;Cluster-44281.93257;Cluster-44281.94960;Cluster-4428…	K00010+K00469+K00469+K00889+K00889+K00889+K00889+K00889+K00889+K00913+K00914+K00914+K00915+K00921+K00921+K00921+K01092+K01092+K01092+K01092+K01099+K01099+K01099+K01110+K01114+K01114+K01114+K01114+K01771+K03103+K05857+K10572+K18081+K20278+K20279+K20279+K20279+K21797+K22913		Carbon fixation in photosynthetic organisms	ko00710	145 out of 8252 1.75714978187106%	1082 out of 58977 1.83461349339573%	0.726797	1	Cluster-44281.100235;Cluster-44281.112754;Cluster-44281.130408;Cluster-44281.142186;Cluster-44281.144284;Cluster-44281.30194;Cluster-44281.46947;Cluster-44281.48123;Cluster-44281.66123;Cluster-44281.71427;Cluster-44281.71428;Cluster-14746.0;Cluster-44281.10119;Cluster-44281.106440;Cluster-44281.112351;Cluster-44281.115888;Cluster-44281.47533;Cluster-44281.50548;Cluster-44281.91907;Cluster-44281.9…	K00025+K00025+K00025+K00025+K00025+K00025+K00025+K00025+K00025+K00025+K00025+K00026+K00026+K00026+K00026+K00026+K00026+K00026+K00026+K00026+K00026+K00026+K00028+K00029+K00029+K00029+K00029+K00029+K00029+K00029+K00029+K00029+K00029+K00029+K00029+K00029+K00029+K00029+K00029+K00029+K00029+K00029+K00029+K00134+K00134+K00134+K00134+K00134+K00134+K00134+K00134+K00134+K00134+K00134+K00134+K00134+K00134+…		One carbon pool by folate	ko00670	26 out of 6519 0.398834177021015%	264 out of 58977 0.447632127778626%	0.761782	1	Cluster-44281.122269;Cluster-44281.50053;Cluster-44281.98257;Cluster-44281.77623;Cluster-44281.127754;Cluster-22889.0;Cluster-44281.107975;Cluster-44281.108023;Cluster-44281.126216;Cluster-44281.43802;Cluster-44281.66056;Cluster-44281.74676;Cluster-44281.80801;Cluster-44281.87708;Cluster-44281.88636;Cluster-44281.88637;Cluster-44281.89296;Cluster-44281.89325;Cluster-44281.93602;Cluster-44281.9617…	K00288+K00288+K00288+K00297+K00548+K00600+K00600+K00600+K00600+K00600+K00600+K00600+K00600+K00600+K00600+K00600+K00600+K00600+K00600+K00600+K00600+K00602+K01433+K01934+K01934+K01938
Limonene and pinene degradation	ko00903	7 out of 3435 0.203784570596798%	153 out of 58977 0.259423164962613%	0.793525	1	Cluster-31771.0;Cluster-44281.129550;Cluster-44281.142295;Cluster-44281.24669;Cluster-44281.37314;Cluster-44281.56577;Cluster-44281.93660	K00128+K00128+K00128+K00128+K00128+K00128+K00128		Glycosphingolipid biosynthesis - globo and isoglobo series	ko00603	24 out of 8252 0.290838584585555%	190 out of 58977 0.322159485901284%	0.73607	1	Cluster-44281.41877;Cluster-44281.41880;Cluster-44281.102996;Cluster-44281.106027;Cluster-44281.112268;Cluster-44281.113571;Cluster-44281.120267;Cluster-44281.29427;Cluster-44281.31000;Cluster-44281.49432;Cluster-44281.60057;Cluster-44281.74089;Cluster-44281.74091;Cluster-44281.77818;Cluster-44281.78606;Cluster-44281.78971;Cluster-44281.80021;Cluster-44281.86418;Cluster-19680.0;Cluster-44281.1000…	K03368+K03368+K07407+K07407+K07407+K07407+K07407+K07407+K07407+K07407+K07407+K07407+K07407+K07407+K07407+K07407+K07407+K07407+K12373+K12373+K12373+K12373+K12373+K12373		Vitamin B6 metabolism	ko00750	16 out of 6519 0.245436416628317%	167 out of 58977 0.283161232344812%	0.763113	1	Cluster-44281.114320;Cluster-44281.21128;Cluster-44281.36057;Cluster-44281.73527;Cluster-44281.79411;Cluster-44281.103156;Cluster-44281.46891;Cluster-44281.50142;Cluster-44281.59186;Cluster-44281.73138;Cluster-44281.82259;Cluster-44281.92970;Cluster-44281.114656;Cluster-44281.124998;Cluster-44281.51245;Cluster-44281.86495	K00275+K00275+K00275+K00831+K00831+K05275+K05275+K05275+K05275+K05275+K05275+K05275+K13248+K13248+K13248+K13248
Arginine biosynthesis	ko00220	20 out of 3435 0.582241630276565%	402 out of 58977 0.681621649117453%	0.795996	1	Cluster-44281.142153;Cluster-64421.0;Cluster-44281.54091;Cluster-44281.89269;Cluster-44281.57126;Cluster-44281.72109;Cluster-44281.1368;Cluster-44281.181;Cluster-44281.26291;Cluster-44281.35451;Cluster-44281.36917;Cluster-44281.4413;Cluster-44281.92726;Cluster-44281.39081;Cluster-44281.97012;Cluster-19797.0;Cluster-44281.118980;Cluster-44281.59777;Cluster-44281.89151;Cluster-44281.57430	K00145+K00262+K00611+K00930+K01438+K01755+K01915+K01915+K01915+K01915+K01915+K01915+K01915+K01940+K01940+K12659+K13427+K14272+K14677+K14682		Other glycan degradation	ko00511	47 out of 8252 0.569558894813379%	363 out of 58977 0.61549417569561%	0.739135	1	Cluster-44281.24706;Cluster-44281.24708;Cluster-44281.102938;Cluster-44281.112534;Cluster-44281.119543;Cluster-44281.124525;Cluster-44281.140398;Cluster-44281.69710;Cluster-44281.80118;Cluster-44281.102067;Cluster-44281.108776;Cluster-44281.130024;Cluster-44281.13267;Cluster-44281.18306;Cluster-44281.18580;Cluster-44281.46636;Cluster-44281.59946;Cluster-44281.60343;Cluster-44281.66766;Cluster-442…	K01190+K01190+K01191+K01191+K01191+K01191+K01191+K01191+K01191+K01206+K01206+K01206+K01206+K01206+K01206+K01206+K01206+K01206+K01206+K01206+K01206+K01227+K01444+K12309+K12309+K12309+K12309+K12309+K12309+K12309+K12309+K12309+K12309+K12309+K12309+K12309+K12309+K12373+K12373+K12373+K12373+K12373+K12373+K15923+K17108+K17108+K17108		Glycerophospholipid metabolism	ko00564	89 out of 6519 1.36524006749501%	870 out of 58977 1.47515133017956%	0.796983	1	Cluster-44281.107783;Cluster-44281.99711;Cluster-44281.40713;Cluster-44281.44006;Cluster-44281.67425;Cluster-44281.80624;Cluster-44281.91159;Cluster-44281.939;Cluster-44281.942;Cluster-44281.97008;Cluster-44281.65531;Cluster-44281.78538;Cluster-44281.88604;Cluster-44281.112560;Cluster-44281.139808;Cluster-44281.60481;Cluster-44281.66583;Cluster-44281.66584;Cluster-44281.92163;Cluster-44281.92164;…	K00894+K00894+K00901+K00901+K00901+K00901+K00901+K00901+K00901+K00901+K00967+K00968+K00981+K00993+K00993+K00993+K00993+K00993+K00993+K00993+K00993+K01047+K01047+K01047+K01047+K01047+K01114+K01114+K01114+K01114+K01114+K01114+K01114+K01114+K01115+K01115+K01115+K01115+K01115+K01115+K01126+K01126+K01126+K01126+K01126+K01613+K05929+K05929+K06130+K08744+K13506+K13506+K13509+K13513+K13513+K13513+K13513+…
Amino sugar and nucleotide sugar metabolism	ko00520	68 out of 3435 1.97962154294032%	1289 out of 58977 2.18559777540397%	0.818138	1	Cluster-44281.52856;Cluster-44281.10959;Cluster-44281.132249;Cluster-44281.144549;Cluster-44281.33212;Cluster-50847.0;Cluster-53989.0;Cluster-44281.31213;Cluster-44281.54967;Cluster-44281.65414;Cluster-44281.99847;Cluster-44281.41396;Cluster-44281.56036;Cluster-44281.53954;Cluster-44281.71127;Cluster-44281.129265;Cluster-44281.129266;Cluster-44281.111037;Cluster-44281.4133;Cluster-44281.7182;Clus…	K00326+K00621+K00698+K00698+K00698+K00698+K00698+K00820+K00820+K00820+K00820+K00844+K00844+K00847+K00847+K00963+K00963+K00965+K00966+K00966+K00972+K00975+K00975+K00975+K01183+K01183+K01183+K01183+K01183+K01183+K01183+K01183+K01183+K01810+K01835+K06118+K08678+K08678+K08678+K08679+K08679+K08679+K08679+K08679+K10046+K12373+K12373+K12446+K12446+K12446+K12447+K12448+K12448+K12448+K12448+K12448+K12449+…		AGE-RAGE signaling pathway in diabetic complications	ko04933	38 out of 8252 0.460494425593795%	297 out of 58977 0.503586143750954%	0.748349	1	Cluster-44281.130697;Cluster-44281.46976;Cluster-44281.47375;Cluster-44281.47377;Cluster-44281.91360;Cluster-44281.118060;Cluster-44281.42407;Cluster-44281.88870;Cluster-44281.91760;Cluster-44281.96280;Cluster-63736.1;Cluster-44281.103826;Cluster-44281.51713;Cluster-44281.76811;Cluster-44281.46412;Cluster-44281.46414;Cluster-44281.50583;Cluster-44281.62646;Cluster-44281.76505;Cluster-44281.80906;…	K04371+K04371+K04371+K04371+K04371+K04392+K04392+K04392+K04392+K04392+K04392+K05740+K05740+K05740+K05857+K05857+K05857+K05857+K05857+K05857+K05857+K05857+K06236+K06236+K06236+K06236+K06236+K06236+K06236+K06236+K07827+K07827+K08008+K08008+K08008+K19720+K19720+K19720		Sphingolipid metabolism	ko00600	60 out of 6519 0.92038656235619%	602 out of 58977 1.02073689743459%	0.820619	1	Cluster-44281.22662;Cluster-44281.45881;Cluster-44281.5418;Cluster-44281.89332;Cluster-44281.73165;Cluster-44281.92407;Cluster-44281.24708;Cluster-44281.112543;Cluster-44281.121181;Cluster-44281.42130;Cluster-61620.1;Cluster-44281.18329;Cluster-44281.38283;Cluster-44281.51417;Cluster-44281.37980;Cluster-44281.50525;Cluster-44281.96038;Cluster-44281.68954;Cluster-44281.136028;Cluster-44281.14339;C…	K00654+K00654+K00654+K00654+K00720+K00720+K01190+K04628+K04708+K04708+K04709+K04710+K04710+K04710+K04711+K04712+K04712+K04713+K04715+K04715+K04716+K04716+K04716+K04716+K04716+K04716+K04716+K07407+K07407+K07407+K07407+K07407+K07407+K07407+K07407+K07407+K07407+K07407+K07407+K07407+K07407+K07407+K07407+K12309+K12309+K12309+K12309+K12309+K12309+K12309+K12309+K12309+K12309+K12349+K12349+K12349+K12349+…
Lipoic acid metabolism	ko00785	1 out of 3435 0.0291120815138282%	30 out of 58977 0.0508672872475711%	0.834816	1	Cluster-44281.49272	K03801		Glycosaminoglycan degradation	ko00531	28 out of 8252 0.339311682016481%	224 out of 58977 0.379809078115197%	0.767591	1	Cluster-44281.36356;Cluster-44281.24550;Cluster-44281.30225;Cluster-44281.57727;Cluster-44281.72441;Cluster-44281.72442;Cluster-44281.74661;Cluster-58760.0;Cluster-44281.100144;Cluster-44281.115628;Cluster-44281.122350;Cluster-44281.13236;Cluster-44281.139103;Cluster-44281.62954;Cluster-44281.62955;Cluster-44281.77181;Cluster-44281.82150;Cluster-44281.84117;Cluster-44281.87873;Cluster-44281.95618…	K01205+K07964+K07964+K07964+K07964+K07964+K10532+K10532+K12309+K12309+K12309+K12309+K12309+K12309+K12309+K12309+K12309+K12309+K12309+K12309+K12309+K12309+K12373+K12373+K12373+K12373+K12373+K12373		Nitrogen metabolism	ko00910	34 out of 6519 0.521552385335174%	365 out of 58977 0.618885328178782%	0.875816	1	Cluster-44281.28890;Cluster-44281.52683;Cluster-44281.84004;Cluster-44281.97416;Cluster-44281.99432;Cluster-44281.87686;Cluster-44281.53763;Cluster-44281.44931;Cluster-44281.56372;Cluster-44281.63907;Cluster-44281.73225;Cluster-44281.96917;Cluster-44281.6178;Cluster-44281.63172;Cluster-44281.63173;Cluster-44281.63356;Cluster-44281.68102;Cluster-44281.73190;Cluster-44281.83471;Cluster-44281.86099;…	K00261+K00261+K00261+K00261+K00261+K00264+K01455+K01673+K01673+K01673+K01673+K01673+K01674+K01674+K01674+K01674+K01674+K01674+K01674+K01674+K01674+K01674+K01674+K01915+K01915+K01915+K01915+K01915+K01915+K01915+K01915+K02575+K02575+K02575
C5-Branched dibasic acid metabolism	ko00660	4 out of 3435 0.116448326055313%	99 out of 58977 0.167862047916985%	0.835124	1	Cluster-50626.0;Cluster-44281.18364;Cluster-44281.149638;Cluster-44281.123686	K00052+K01652+K01653+K01704		Isoflavonoid biosynthesis	ko00943	1 out of 8252 0.0121182743577315%	10 out of 58977 0.016955762415857%	0.778517	1	Cluster-44281.91198	K13260		Non-homologous end-joining	ko03450	4 out of 6519 0.0613591041570793%	56 out of 58977 0.0949522695287994%	0.879796	1	Cluster-44281.104343;Cluster-44281.23166;Cluster-44281.64023;Cluster-44281.59383	K04799+K06642+K06642+K10884
Selenocompound metabolism	ko00450	16 out of 3435 0.465793304221252%	338 out of 58977 0.573104769655968%	0.83518	1	Cluster-27313.0;Cluster-28855.1;Cluster-39189.0;Cluster-44281.148117;Cluster-44281.68922;Cluster-44281.72749;Cluster-44281.79288;Cluster-44281.65034;Cluster-44281.80579;Cluster-44281.31483;Cluster-73570.0;Cluster-6623.0;Cluster-44281.82775;Cluster-44281.82776;Cluster-44281.121928;Cluster-44281.111150	K00384+K00384+K00384+K00384+K00549+K00549+K00549+K00816+K00816+K01758+K01758+K01760+K01761+K01761+K01874+K11717		Indole alkaloid biosynthesis	ko00901	10 out of 8252 0.121182743577315%	88 out of 58977 0.149210709259542%	0.804059	1	Cluster-44281.11121;Cluster-44281.141168;Cluster-44281.15133;Cluster-44281.22913;Cluster-44281.35724;Cluster-44281.35726;Cluster-44281.35727;Cluster-44281.62270;Cluster-44281.93471;Cluster-44281.97711	K01593+K21026+K21026+K21026+K21026+K21026+K21026+K21026+K21026+K21026		Steroid biosynthesis	ko00100	29 out of 6519 0.444853505138825%	318 out of 58977 0.539193244824254%	0.88573	1	Cluster-44281.65339;Cluster-44281.110163;Cluster-11467.0;Cluster-38405.0;Cluster-44281.19213;Cluster-44281.97983;Cluster-75519.0;Cluster-44281.34027;Cluster-69963.0;Cluster-44281.68413;Cluster-44281.72480;Cluster-44281.90237;Cluster-44281.97492;Cluster-58844.1;Cluster-44281.44538;Cluster-13792.0;Cluster-44281.105620;Cluster-44281.37089;Cluster-44281.48608;Cluster-44281.87005;Cluster-44281.99794;C…	K00213+K00223+K00227+K00227+K00511+K00511+K00511+K00559+K00801+K01052+K01052+K01052+K01052+K01052+K01824+K01852+K05917+K07748+K07748+K08246+K09828+K09831+K09831+K09832+K14423+K14424+K14424+K14674+K14674
Synthesis and degradation of ketone bodies	ko00072	5 out of 3435 0.145560407569141%	121 out of 58977 0.20516472523187%	0.839664	1	Cluster-44281.146243;Cluster-44281.95615;Cluster-25224.4;Cluster-44281.400;Cluster-44281.50546	K00626+K00626+K01641+K01641+K01641		Mannose type O-glycan biosynthesis	ko00515	3 out of 8252 0.0363548230731944%	30 out of 58977 0.0508672872475711%	0.811033	1	Cluster-44281.12159;Cluster-44281.35097;Cluster-4610.0	K00728+K00728+K00728		Selenocompound metabolism	ko00450	31 out of 6519 0.475533057217365%	338 out of 58977 0.573104769655968%	0.885861	1	Cluster-44281.121844;Cluster-44281.128072;Cluster-44281.145313;Cluster-44281.71982;Cluster-44281.74857;Cluster-7968.0;Cluster-44281.127754;Cluster-44281.110261;Cluster-44281.17098;Cluster-44281.42036;Cluster-44281.50346;Cluster-44281.68920;Cluster-44281.68922;Cluster-44281.71664;Cluster-44281.75034;Cluster-44281.79709;Cluster-44281.80715;Cluster-44281.83376;Cluster-75568.0;Cluster-44281.13004;Clu…	K00384+K00384+K00384+K00384+K00384+K00384+K00548+K00549+K00549+K00549+K00549+K00549+K00549+K00549+K00549+K00549+K00549+K00549+K00549+K00958+K01758+K01761+K01874+K01874+K11717+K11717+K13811+K13811+K13811+K13811+K13811
Glycerophospholipid metabolism	ko00564	44 out of 3435 1.28093158660844%	870 out of 58977 1.47515133017956%	0.852832	1	Cluster-44281.1142;Cluster-44281.48625;Cluster-44281.62442;Cluster-44281.96088;Cluster-44281.79714;Cluster-44281.79815;Cluster-44281.126305;Cluster-44281.17896;Cluster-44281.143514;Cluster-44281.22665;Cluster-44281.72446;Cluster-44281.103994;Cluster-44281.43771;Cluster-44281.55396;Cluster-44281.98512;Cluster-44281.60622;Cluster-44281.24817;Cluster-44281.51888;Cluster-44281.62721;Cluster-44281.750…	K00111+K00901+K00901+K00901+K00967+K00968+K00993+K00993+K01047+K01047+K01047+K01114+K01114+K01114+K01114+K01115+K01126+K01126+K01126+K01126+K01126+K01126+K01126+K06129+K13333+K13508+K13510+K13511+K13621+K14156+K14156+K14156+K16817+K16818+K16818+K16818+K16818+K16860+K18693+K18693+K18696+K18696+K18696+K22389		C5-Branched dibasic acid metabolism	ko00660	11 out of 8252 0.133301017935046%	99 out of 58977 0.167862047916985%	0.834331	1	Cluster-50626.0;Cluster-29516.0;Cluster-44281.111425;Cluster-44281.127843;Cluster-44281.18364;Cluster-44281.83486;Cluster-50236.1;Cluster-63580.0;Cluster-44281.115811;Cluster-44281.115812;Cluster-44281.149638	K00052+K01652+K01652+K01652+K01652+K01652+K01652+K01652+K01653+K01653+K01653		Glyoxylate and dicarboxylate metabolism	ko00630	151 out of 6519 2.31630618192974%	1494 out of 58977 2.53319090492904%	0.890459	1	Cluster-3378.0;Cluster-44281.102708;Cluster-44281.112754;Cluster-44281.144284;Cluster-44281.30194;Cluster-44281.46947;Cluster-44281.66123;Cluster-44281.71427;Cluster-44281.71428;Cluster-44281.106439;Cluster-44281.106440;Cluster-44281.115888;Cluster-44281.47533;Cluster-44281.50548;Cluster-44281.91907;Cluster-44281.92087;Cluster-54345.1;Cluster-54345.3;Cluster-44281.101323;Cluster-44281.101979;Clus…	K00015+K00025+K00025+K00025+K00025+K00025+K00025+K00025+K00025+K00026+K00026+K00026+K00026+K00026+K00026+K00026+K00026+K00026+K00122+K00122+K00122+K00122+K00122+K00122+K00122+K00122+K00122+K00122+K00122+K00122+K00122+K00122+K00122+K00122+K00122+K00122+K00122+K00122+K00281+K00281+K00281+K00281+K00281+K00382+K00382+K00382+K00382+K00382+K00600+K00600+K00600+K00600+K00600+K00600+K00600+K00600+K00600+…
Tryptophan metabolism	ko00380	34 out of 3435 0.98981077147016%	686 out of 58977 1.16316530172779%	0.855969	1	Cluster-31771.0;Cluster-44281.129550;Cluster-44281.142295;Cluster-44281.24669;Cluster-44281.37314;Cluster-44281.56577;Cluster-44281.93660;Cluster-44281.72662;Cluster-44281.78168;Cluster-44281.79063;Cluster-44281.84582;Cluster-44281.45987;Cluster-44281.146243;Cluster-44281.95615;Cluster-44281.141893;Cluster-44281.65034;Cluster-44281.80579;Cluster-44281.93718;Cluster-44281.96256;Cluster-38307.0;Clu…	K00128+K00128+K00128+K00128+K00128+K00128+K00128+K00382+K00382+K00382+K00382+K00486+K00626+K00626+K00658+K00816+K00816+K00837+K00837+K01426+K01426+K01426+K03781+K03781+K03782+K07408+K07409+K07409+K14085+K14085+K14085+K14085+K14085+K22450		Vancomycin resistance	ko01502	1 out of 8252 0.0121182743577315%	12 out of 58977 0.0203469148990284%	0.83617	1	Cluster-44281.38136	K01000		Biosynthesis of unsaturated fatty acids	ko01040	37 out of 6519 0.567571713452984%	399 out of 58977 0.676534920392695%	0.890582	1	Cluster-44281.73438;Cluster-44281.79008;Cluster-41694.1;Cluster-44281.116;Cluster-44281.109236;Cluster-44281.75593;Cluster-44281.75594;Cluster-44281.88210;Cluster-44281.41900;Cluster-44281.52847;Cluster-44281.61627;Cluster-44281.68902;Cluster-44281.68906;Cluster-44281.72036;Cluster-44281.72037;Cluster-44281.79629;Cluster-44281.84593;Cluster-44281.86744;Cluster-44281.86745;Cluster-44281.88188;Clus…	K00232+K00232+K00507+K00507+K01068+K03921+K03921+K03921+K07513+K07513+K07513+K07513+K07513+K07513+K07513+K07513+K07513+K07513+K07513+K07513+K07513+K10246+K10246+K10246+K10246+K10246+K10249+K10249+K10249+K10249+K10249+K10249+K10249+K10249+K10256+K10256+K10256
Fatty acid metabolism	ko01212	52 out of 3435 1.51382823871907%	1023 out of 58977 1.73457449514217%	0.862771	1	Cluster-44281.110221;Cluster-44281.118032;Cluster-44281.59627;Cluster-44281.71238;Cluster-44281.92581;Cluster-57552.0;Cluster-44281.73438;Cluster-37727.0;Cluster-44281.36182;Cluster-32116.0;Cluster-32116.1;Cluster-32116.2;Cluster-32116.7;Cluster-44281.116;Cluster-44281.116273;Cluster-44281.141875;Cluster-44281.32435;Cluster-44281.50933;Cluster-44281.146243;Cluster-44281.95615;Cluster-44281.51749;…	K00059+K00059+K00059+K00059+K00059+K00059+K00232+K00249+K00249+K00507+K00507+K00507+K00507+K00507+K00507+K00507+K00507+K00507+K00626+K00626+K00645+K01897+K01897+K01897+K01963+K01963+K07513+K07513+K07513+K07513+K07513+K07513+K07513+K07513+K09458+K09458+K09458+K09458+K09458+K10246+K10249+K10256+K10256+K10256+K10527+K10527+K10527+K10527+K10527+K10781+K10781+K10781		Proteasome	ko03050	69 out of 8252 0.836160930683471%	550 out of 58977 0.932566932872137%	0.852198	1	Cluster-44281.69362;Cluster-44281.74289;Cluster-44281.43975;Cluster-30010.0;Cluster-20424.0;Cluster-44281.62458;Cluster-44281.68650;Cluster-44281.77568;Cluster-44281.123206;Cluster-44281.128830;Cluster-44281.129300;Cluster-44281.133421;Cluster-44281.39027;Cluster-44281.53985;Cluster-44281.62874;Cluster-44281.67104;Cluster-44281.69154;Cluster-44281.41687;Cluster-44281.41688;Cluster-44281.79160;Clu…	K02725+K02725+K02727+K02732+K03028+K03028+K03028+K03028+K03029+K03029+K03029+K03029+K03029+K03029+K03029+K03029+K03029+K03030+K03030+K03031+K03032+K03032+K03032+K03032+K03032+K03032+K03036+K03036+K03036+K03038+K03038+K03039+K03061+K03062+K03062+K03063+K03063+K03063+K03063+K03063+K03063+K03063+K03063+K03063+K03063+K03063+K03063+K03063+K03063+K03063+K03063+K03063+K03063+K03063+K03065+K06691+K06691+…		Arginine biosynthesis	ko00220	37 out of 6519 0.567571713452984%	402 out of 58977 0.681621649117453%	0.899856	1	Cluster-44281.142153;Cluster-44281.73860;Cluster-44281.79834;Cluster-44281.80299;Cluster-44281.8483;Cluster-44281.28890;Cluster-44281.52683;Cluster-44281.84004;Cluster-44281.97416;Cluster-44281.99432;Cluster-44281.76092;Cluster-44281.92519;Cluster-44281.3430;Cluster-41049.0;Cluster-44281.83026;Cluster-44281.124104;Cluster-44281.26290;Cluster-44281.26291;Cluster-44281.32701;Cluster-44281.35451;Clu…	K00145+K00145+K00145+K00145+K00145+K00261+K00261+K00261+K00261+K00261+K00611+K00611+K00818+K01476+K01476+K01915+K01915+K01915+K01915+K01915+K01915+K01915+K01915+K01940+K01940+K01940+K01940+K01940+K01940+K01940+K01940+K13427+K14454+K14677+K14677+K14682+K14682
Isoquinoline alkaloid biosynthesis	ko00950	16 out of 3435 0.465793304221252%	351 out of 58977 0.595147260796582%	0.873319	1	Cluster-44281.130448;Cluster-44281.133460;Cluster-44281.126844;Cluster-44281.69869;Cluster-44281.107372;Cluster-44281.147019;Cluster-44281.39060;Cluster-44281.80210;Cluster-44281.145280;Cluster-44281.146350;Cluster-44281.33522;Cluster-44281.33523;Cluster-44281.41014;Cluster-44281.60314;Cluster-44281.91727;Cluster-44281.99034	K00276+K00422+K00505+K00505+K00815+K00815+K13390+K13390+K13395+K14975+K14975+K14975+K14975+K14975+K14975+K14975		Valine, leucine and isoleucine degradation	ko00280	101 out of 8252 1.22394571013088%	793 out of 58977 1.34459195957746%	0.859893	1	Cluster-44281.104094;Cluster-44281.149896;Cluster-44281.35021;Cluster-44281.39647;Cluster-44281.39993;Cluster-44281.44679;Cluster-44281.47182;Cluster-44281.48948;Cluster-44281.58115;Cluster-44281.61967;Cluster-44281.62445;Cluster-44281.68565;Cluster-44281.70045;Cluster-44281.71379;Cluster-44281.74669;Cluster-44281.75163;Cluster-44281.75164;Cluster-44281.76378;Cluster-44281.80686;Cluster-44281.819…	K00020+K00020+K00020+K00020+K00020+K00020+K00020+K00020+K00020+K00020+K00020+K00020+K00020+K00020+K00020+K00020+K00020+K00020+K00020+K00020+K00020+K00020+K00020+K00128+K00128+K00128+K00128+K00128+K00128+K00128+K00128+K00128+K00128+K00128+K00128+K00128+K00128+K00128+K00128+K00128+K00128+K00128+K00128+K00128+K00140+K00140+K00140+K00249+K00249+K00249+K00253+K00253+K00382+K00382+K00382+K00382+K00626+…		Photosynthesis - antenna proteins	ko00196	8 out of 6519 0.122718208314159%	104 out of 58977 0.176339929124913%	0.899917	1	Cluster-44281.59032;Cluster-44281.67317;Cluster-44281.79388;Cluster-44281.88774;Cluster-44281.66671;Cluster-44281.79912;Cluster-44281.86592;Cluster-44281.145326	K08907+K08907+K08909+K08909+K08910+K08915+K08915+K14172
Phenylalanine, tyrosine and tryptophan biosynthesis	ko00400	23 out of 3435 0.66957787481805%	497 out of 58977 0.842701392068094%	0.895819	1	Cluster-44281.80372;Cluster-44281.107372;Cluster-44281.147019;Cluster-44281.15092;Cluster-44281.72551;Cluster-44281.73473;Cluster-44281.83101;Cluster-47117.1;Cluster-44281.133833;Cluster-44281.25665;Cluster-44281.60094;Cluster-44281.138304;Cluster-44281.110765;Cluster-44281.31853;Cluster-44281.75674;Cluster-44281.91826;Cluster-44281.92145;Cluster-44281.96990;Cluster-44281.98172;Cluster-44281.1285…	K00800+K00815+K00815+K00891+K01626+K01626+K01626+K01626+K01657+K01694+K01695+K01696+K01850+K05359+K05359+K05359+K05359+K05359+K06001+K09484+K13830+K13832+K15227		Histidine metabolism	ko00340	29 out of 8252 0.351429956374212%	248 out of 58977 0.420502907913254%	0.87391	1	Cluster-44281.77704;Cluster-31771.0;Cluster-34900.0;Cluster-36458.0;Cluster-44281.114692;Cluster-44281.129550;Cluster-44281.142295;Cluster-44281.1945;Cluster-44281.24669;Cluster-44281.37314;Cluster-44281.38718;Cluster-44281.47642;Cluster-44281.5008;Cluster-44281.59177;Cluster-44281.62140;Cluster-44281.67186;Cluster-44281.77665;Cluster-44281.78109;Cluster-44281.81549;Cluster-44281.85607;Cluster-44…	K00013+K00128+K00128+K00128+K00128+K00128+K00128+K00128+K00128+K00128+K00128+K00128+K00128+K00128+K00128+K00128+K00128+K00128+K00128+K00128+K00128+K00128+K01590+K01663+K01814+K11755+K14085+K14085+K14085		Glycosaminoglycan degradation	ko00531	19 out of 6519 0.291455744746127%	224 out of 58977 0.379809078115197%	0.913474	1	Cluster-44281.39548;Cluster-44281.39866;Cluster-44281.57727;Cluster-44281.105895;Cluster-58760.3;Cluster-44281.115628;Cluster-44281.120515;Cluster-44281.122350;Cluster-44281.13236;Cluster-44281.62954;Cluster-44281.62955;Cluster-44281.82095;Cluster-44281.82150;Cluster-44281.95618;Cluster-44281.96861;Cluster-44281.100062;Cluster-44281.15562;Cluster-44281.71032;Cluster-44281.8805	K07964+K07964+K07964+K10532+K10532+K12309+K12309+K12309+K12309+K12309+K12309+K12309+K12309+K12309+K12309+K12373+K12373+K12373+K12373
Carbon fixation in photosynthetic organisms	ko00710	54 out of 3435 1.57205240174672%	1082 out of 58977 1.83461349339573%	0.895954	1	Cluster-44281.102708;Cluster-44281.142163;Cluster-14746.0;Cluster-44281.106439;Cluster-44281.120101;Cluster-44281.122511;Cluster-44281.60671;Cluster-44281.92087;Cluster-44281.144029;Cluster-44281.53418;Cluster-44281.56408;Cluster-44281.71054;Cluster-44281.83541;Cluster-44281.92281;Cluster-44281.86363;Cluster-44281.48799;Cluster-44281.51671;Cluster-44281.45334;Cluster-44281.98047;Cluster-44281.806…	K00025+K00025+K00026+K00026+K00026+K00026+K00026+K00026+K00029+K00029+K00029+K00029+K00029+K00029+K00051+K00134+K00134+K00615+K00615+K01100+K01595+K01595+K01595+K01595+K01602+K01602+K01602+K01610+K01610+K01610+K01610+K01610+K01610+K01610+K01610+K01610+K01610+K01610+K01623+K01623+K01623+K01623+K01623+K01624+K01624+K01783+K01807+K03841+K03841+K03841+K03841+K05298+K05298+K14272		Sphingolipid metabolism	ko00600	75 out of 8252 0.908870576829859%	602 out of 58977 1.02073689743459%	0.875794	1	Cluster-19278.0;Cluster-44281.119842;Cluster-44281.20174;Cluster-44281.45881;Cluster-44281.5418;Cluster-44281.89332;Cluster-44281.73165;Cluster-44281.24706;Cluster-44281.24708;Cluster-44281.112543;Cluster-44281.121181;Cluster-44281.19287;Cluster-44281.42129;Cluster-44281.42130;Cluster-61620.1;Cluster-44281.18329;Cluster-44281.38280;Cluster-44281.38283;Cluster-44281.51417;Cluster-44281.79592;Clust…	K00654+K00654+K00654+K00654+K00654+K00654+K00720+K01190+K01190+K04628+K04708+K04708+K04708+K04708+K04709+K04710+K04710+K04710+K04710+K04710+K04711+K04712+K04712+K04713+K04715+K04715+K04715+K04715+K04716+K04716+K04716+K04716+K04716+K04716+K04716+K04718+K04718+K07407+K07407+K07407+K07407+K07407+K07407+K07407+K07407+K07407+K07407+K07407+K07407+K07407+K07407+K07407+K07407+K12309+K12309+K12309+K12309+…		Mismatch repair	ko03430	31 out of 6519 0.475533057217365%	347 out of 58977 0.588364955830239%	0.914627	1	Cluster-44281.64692;Cluster-44281.64693;Cluster-44281.85264;Cluster-44281.22008;Cluster-44281.22685;Cluster-44281.79782;Cluster-44281.41995;Cluster-44281.94693;Cluster-44281.29351;Cluster-44281.86784;Cluster-44281.115046;Cluster-44281.116132;Cluster-44281.87118;Cluster-44281.103676;Cluster-44281.119742;Cluster-44281.139079;Cluster-44281.19265;Cluster-44281.63966;Cluster-44281.37577;Cluster-44281.…	K02327+K02327+K02327+K02328+K03111+K03111+K03505+K03505+K03657+K03657+K07456+K07456+K07456+K07466+K07466+K07466+K07466+K07466+K08737+K08737+K08739+K10740+K10746+K10747+K10747+K10747+K10754+K10755+K10755+K10756+K10756
Flavone and flavonol biosynthesis	ko00944	13 out of 3435 0.378457059679767%	301 out of 58977 0.510368448717297%	0.897288	1	Cluster-39018.0;Cluster-44281.119415;Cluster-44281.29648;Cluster-44281.5684;Cluster-44281.85320;Cluster-44281.86288;Cluster-19647.0;Cluster-44281.127993;Cluster-44281.23207;Cluster-44281.42630;Cluster-44281.49129;Cluster-54546.0;Cluster-64201.0	K05280+K05280+K13083+K13083+K13083+K13083+K22772+K22772+K22772+K22772+K22772+K22772+K22772		Phenylalanine, tyrosine and tryptophan biosynthesis	ko00400	61 out of 8252 0.739214735821619%	497 out of 58977 0.842701392068094%	0.881081	1	Cluster-44281.80372;Cluster-44281.96397;Cluster-44281.107372;Cluster-44281.133977;Cluster-44281.129981;Cluster-44281.15092;Cluster-44281.34788;Cluster-44281.79823;Cluster-44281.83951;Cluster-44281.83952;Cluster-44281.57330;Cluster-44281.64130;Cluster-44281.71225;Cluster-44281.83101;Cluster-47117.1;Cluster-8349.0;Cluster-44281.21508;Cluster-44281.52776;Cluster-44281.55489;Cluster-44281.99923;Clust…	K00800+K00800+K00815+K00815+K00891+K00891+K00891+K00891+K01609+K01609+K01626+K01626+K01626+K01626+K01626+K01626+K01657+K01657+K01657+K01657+K01658+K01694+K01695+K01696+K01696+K01735+K01735+K01735+K01736+K01736+K01850+K01850+K05359+K05359+K05359+K05359+K05359+K05359+K05359+K05359+K05359+K09484+K13830+K13830+K13832+K13832+K13832+K13832+K13832+K13832+K13832+K13832+K14454+K14454+K14454+K14455+K15227+…		Phenylalanine, tyrosine and tryptophan biosynthesis	ko00400	46 out of 6519 0.705629697806412%	497 out of 58977 0.842701392068094%	0.915111	1	Cluster-44281.58473;Cluster-44281.69507;Cluster-44281.133977;Cluster-44281.147019;Cluster-44281.33375;Cluster-44281.34788;Cluster-44281.40238;Cluster-44281.83199;Cluster-44281.128220;Cluster-44281.83952;Cluster-44281.52800;Cluster-44281.57330;Cluster-44281.64130;Cluster-44281.71225;Cluster-44281.72550;Cluster-44281.72551;Cluster-44281.73470;Cluster-44281.83101;Cluster-44281.97211;Cluster-8349.0;C…	K00800+K00800+K00815+K00815+K00891+K00891+K00891+K00891+K01609+K01609+K01626+K01626+K01626+K01626+K01626+K01626+K01626+K01626+K01626+K01626+K01657+K01657+K01657+K01696+K01735+K01736+K01736+K05359+K05359+K05359+K05359+K05359+K05359+K05359+K06001+K06001+K13832+K13832+K13832+K13832+K13832+K13832+K13832+K14454+K15227+K15227
Monobactam biosynthesis	ko00261	6 out of 3435 0.174672489082969%	161 out of 58977 0.272987774895298%	0.912248	1	Cluster-44281.37144;Cluster-44281.26531;Cluster-44281.32203;Cluster-44281.74092;Cluster-44281.74093;Cluster-44281.83368	K00133+K00928+K00928+K00928+K00928+K00928		SNARE interactions in vesicular transport	ko04130	31 out of 8252 0.375666505089675%	266 out of 58977 0.451023280261797%	0.885032	1	Cluster-44281.103701;Cluster-44281.111008;Cluster-44281.118224;Cluster-44281.118225;Cluster-44281.120002;Cluster-44281.149631;Cluster-44281.149918;Cluster-44281.39692;Cluster-44281.47834;Cluster-44281.53769;Cluster-44281.54494;Cluster-44281.88474;Cluster-44281.92891;Cluster-44281.94802;Cluster-44281.99489;Cluster-44281.105381;Cluster-62051.0;Cluster-44281.140317;Cluster-44281.29989;Cluster-44281.…	K08486+K08486+K08486+K08486+K08486+K08486+K08486+K08486+K08486+K08486+K08486+K08486+K08486+K08486+K08486+K08488+K08490+K08492+K08493+K08493+K08495+K08497+K08498+K08498+K08503+K08506+K08507+K08513+K08515+K08516+K08517		Caffeine metabolism	ko00232	3 out of 6519 0.0460193281178095%	49 out of 58977 0.0830832358376994%	0.918879	1	Cluster-44281.56040;Cluster-44281.93980;Cluster-44281.39661	K00106+K00106+K07409
Glycolysis / Gluconeogenesis	ko00010	95 out of 3435 2.76564774381368%	1857 out of 58977 3.14868508062465%	0.917515	1	Cluster-56640.0;Cluster-896.0;Cluster-43949.0;Cluster-44281.103806;Cluster-44281.114892;Cluster-44281.127053;Cluster-44281.130302;Cluster-44281.19089;Cluster-44281.337;Cluster-44281.75051;Cluster-44281.76587;Cluster-44281.64417;Cluster-44281.67513;Cluster-42540.0;Cluster-44281.128771;Cluster-44281.44023;Cluster-4862.0;Cluster-31771.0;Cluster-44281.129550;Cluster-44281.142295;Cluster-44281.24669;C…	K00001+K00001+K00002+K00002+K00002+K00002+K00002+K00002+K00002+K00002+K00002+K00016+K00016+K00121+K00121+K00121+K00121+K00128+K00128+K00128+K00128+K00128+K00128+K00128+K00131+K00134+K00134+K00162+K00382+K00382+K00382+K00382+K00844+K00844+K00850+K00850+K00873+K00873+K00873+K00873+K00895+K01568+K01568+K01568+K01568+K01610+K01610+K01610+K01610+K01610+K01610+K01610+K01610+K01610+K01610+K01610+K01623+…		Ubiquinone and other terpenoid-quinone biosynthesis	ko00130	43 out of 8252 0.521085797382453%	365 out of 58977 0.618885328178782%	0.905084	1	Cluster-44281.41760;Cluster-44281.67456;Cluster-44281.71821;Cluster-44281.83522;Cluster-44281.107372;Cluster-44281.133977;Cluster-44281.96402;Cluster-44281.104385;Cluster-44281.104386;Cluster-44281.111830;Cluster-44281.32703;Cluster-44281.33800;Cluster-44281.38217;Cluster-44281.38219;Cluster-44281.66535;Cluster-44281.101248;Cluster-44281.125892;Cluster-44281.23106;Cluster-44281.73706;Cluster-4428…	K00457+K00487+K00487+K00487+K00815+K00815+K01661+K01904+K01904+K01904+K01904+K01904+K01904+K01904+K01904+K02548+K02552+K02552+K03183+K03809+K03809+K03809+K03809+K03809+K03809+K03809+K03809+K05928+K06125+K06126+K06127+K09834+K12501+K12501+K12501+K12501+K12501+K12502+K12502+K12502+K14759+K19222+K19222		Tryptophan metabolism	ko00380	65 out of 6519 0.997085442552539%	686 out of 58977 1.16316530172779%	0.919723	1	Cluster-27555.0;Cluster-34900.0;Cluster-44281.114692;Cluster-44281.1945;Cluster-44281.33027;Cluster-44281.38718;Cluster-44281.59177;Cluster-44281.62140;Cluster-44281.67186;Cluster-44281.78109;Cluster-44281.79750;Cluster-44281.81549;Cluster-44281.81635;Cluster-44281.85607;Cluster-73178.3;Cluster-44281.59821;Cluster-44281.72662;Cluster-44281.73969;Cluster-44281.79063;Cluster-44281.84582;Cluster-442…	K00128+K00128+K00128+K00128+K00128+K00128+K00128+K00128+K00128+K00128+K00128+K00128+K00128+K00128+K00128+K00382+K00382+K00382+K00382+K00382+K00486+K00626+K00837+K01426+K01426+K01426+K01426+K01426+K01426+K01426+K01426+K01426+K01593+K01593+K03781+K03781+K03781+K03781+K03781+K03781+K03781+K03781+K03781+K07408+K07408+K07408+K07408+K07408+K07409+K11816+K11820+K11820+K11820+K14085+K14085+K14085+K14085+…
Pyruvate metabolism	ko00620	76 out of 3435 2.21251819505095%	1518 out of 58977 2.5738847347271%	0.926712	1	Cluster-44281.64417;Cluster-44281.67513;Cluster-44281.102708;Cluster-44281.142163;Cluster-14746.0;Cluster-44281.106439;Cluster-44281.120101;Cluster-44281.122511;Cluster-44281.60671;Cluster-44281.92087;Cluster-44281.144029;Cluster-44281.53418;Cluster-44281.56408;Cluster-44281.71054;Cluster-44281.83541;Cluster-44281.92281;Cluster-44281.86363;Cluster-52886.0;Cluster-58529.0;Cluster-31771.0;Cluster-4…	K00016+K00016+K00025+K00025+K00026+K00026+K00026+K00026+K00026+K00026+K00029+K00029+K00029+K00029+K00029+K00029+K00051+K00101+K00101+K00128+K00128+K00128+K00128+K00128+K00128+K00128+K00162+K00382+K00382+K00382+K00382+K00626+K00626+K00873+K00873+K00873+K00873+K01595+K01595+K01595+K01595+K01610+K01610+K01610+K01610+K01610+K01610+K01610+K01610+K01610+K01610+K01610+K01638+K01655+K01655+K01655+K01679+…		Sulfur metabolism	ko00920	46 out of 8252 0.557440620455647%	390 out of 58977 0.661274734218424%	0.910374	1	Cluster-44281.35766;Cluster-44281.41534;Cluster-49707.0;Cluster-44281.51407;Cluster-44281.56189;Cluster-44281.56513;Cluster-44281.97451;Cluster-58661.0;Cluster-44281.125752;Cluster-44281.119019;Cluster-44281.121313;Cluster-44281.24136;Cluster-44281.39955;Cluster-44281.45067;Cluster-3497.0;Cluster-44281.46898;Cluster-44281.13004;Cluster-44281.133255;Cluster-44281.100536;Cluster-44281.110635;Cluste…	K00380+K00380+K00380+K00381+K00381+K00387+K00387+K00387+K00390+K00640+K00640+K00640+K00640+K00640+K00641+K00860+K00958+K00988+K01011+K01082+K01082+K01082+K01082+K01082+K01082+K01082+K01082+K01738+K01738+K01738+K01738+K02045+K02045+K02045+K02045+K02045+K02047+K13811+K13811+K13811+K13811+K13811+K13811+K17069+K17285+K22966		Aflatoxin biosynthesis	ko00254	3 out of 6519 0.0460193281178095%	51 out of 58977 0.0864743883208708%	0.931313	1	Cluster-44281.126815;Cluster-44281.84037;Cluster-55711.0	K11262+K11262+K11262
Thiamine metabolism	ko00730	8 out of 3435 0.232896652110626%	215 out of 58977 0.364548891940926%	0.936934	1	Cluster-44281.43311;Cluster-44281.83655;Cluster-44281.43769;Cluster-56886.0;Cluster-44281.112154;Cluster-44281.51410;Cluster-44281.62566;Cluster-44281.133427	K00939+K00939+K00949+K01077+K03146+K03147+K03147+K04487		Tropane, piperidine and pyridine alkaloid biosynthesis	ko00960	24 out of 8252 0.290838584585555%	218 out of 58977 0.369635620665683%	0.91829	1	Cluster-44281.12532;Cluster-44281.125810;Cluster-44281.126634;Cluster-44281.130448;Cluster-44281.47960;Cluster-44281.58281;Cluster-44281.61740;Cluster-44281.72684;Cluster-44281.79340;Cluster-44281.98497;Cluster-44281.98498;Cluster-44281.98702;Cluster-6970.0;Cluster-44281.107372;Cluster-44281.133977;Cluster-40813.0;Cluster-44281.118176;Cluster-44281.138025;Cluster-44281.49927;Cluster-10621.0;Clust…	K00276+K00276+K00276+K00276+K00276+K00276+K00276+K00276+K00276+K00276+K00276+K00276+K00276+K00815+K00815+K08081+K08081+K08081+K08081+K14454+K14454+K14454+K14455+K15849		Carbon fixation in photosynthetic organisms	ko00710	104 out of 6519 1.59533670808406%	1082 out of 58977 1.83461349339573%	0.944645	1	Cluster-44281.102708;Cluster-44281.112754;Cluster-44281.144284;Cluster-44281.30194;Cluster-44281.46947;Cluster-44281.66123;Cluster-44281.71427;Cluster-44281.71428;Cluster-44281.106439;Cluster-44281.106440;Cluster-44281.115888;Cluster-44281.47533;Cluster-44281.50548;Cluster-44281.91907;Cluster-44281.92087;Cluster-54345.1;Cluster-54345.3;Cluster-44281.51427;Cluster-44281.144029;Cluster-44281.2327;C…	K00025+K00025+K00025+K00025+K00025+K00025+K00025+K00025+K00026+K00026+K00026+K00026+K00026+K00026+K00026+K00026+K00026+K00028+K00029+K00029+K00029+K00029+K00029+K00029+K00029+K00029+K00029+K00029+K00029+K00029+K00029+K00029+K00029+K00029+K00029+K00029+K00029+K00029+K00029+K00051+K00051+K00134+K00134+K00134+K00134+K00134+K00134+K00134+K00134+K00134+K00134+K00134+K00134+K00134+K00615+K00615+K00615+…
Lysine biosynthesis	ko00300	9 out of 3435 0.262008733624454%	238 out of 58977 0.403547145497397%	0.939512	1	Cluster-44281.37144;Cluster-44281.26531;Cluster-44281.32203;Cluster-44281.74092;Cluster-44281.74093;Cluster-44281.83368;Cluster-35410.0;Cluster-43036.0;Cluster-44281.7235	K00133+K00928+K00928+K00928+K00928+K00928+K01655+K01655+K01655		Glyoxylate and dicarboxylate metabolism	ko00630	191 out of 8252 2.31459040232671%	1494 out of 58977 2.53319090492904%	0.920619	1	Cluster-44281.149315;Cluster-44281.100235;Cluster-44281.112754;Cluster-44281.130408;Cluster-44281.142186;Cluster-44281.144284;Cluster-44281.30194;Cluster-44281.46947;Cluster-44281.48123;Cluster-44281.66123;Cluster-44281.71427;Cluster-44281.71428;Cluster-14746.0;Cluster-44281.10119;Cluster-44281.106440;Cluster-44281.112351;Cluster-44281.115888;Cluster-44281.47533;Cluster-44281.50548;Cluster-44281.…	K00015+K00025+K00025+K00025+K00025+K00025+K00025+K00025+K00025+K00025+K00025+K00025+K00026+K00026+K00026+K00026+K00026+K00026+K00026+K00026+K00026+K00026+K00026+K00049+K00122+K00122+K00122+K00122+K00122+K00122+K00122+K00122+K00122+K00122+K00122+K00122+K00122+K00122+K00122+K00122+K00122+K00122+K00122+K00122+K00281+K00281+K00281+K00281+K00281+K00281+K00382+K00382+K00382+K00382+K00600+K00600+K00600+…		Cysteine and methionine metabolism	ko00270	140 out of 6519 2.14756864549778%	1438 out of 58977 2.43823863540024%	0.953098	1	Cluster-33640.0;Cluster-40207.0;Cluster-44281.64417;Cluster-44281.102708;Cluster-44281.112754;Cluster-44281.144284;Cluster-44281.30194;Cluster-44281.46947;Cluster-44281.66123;Cluster-44281.71427;Cluster-44281.71428;Cluster-44281.106439;Cluster-44281.106440;Cluster-44281.115888;Cluster-44281.47533;Cluster-44281.50548;Cluster-44281.91907;Cluster-44281.92087;Cluster-54345.1;Cluster-54345.3;Cluster-1…	K00016+K00016+K00016+K00025+K00025+K00025+K00025+K00025+K00025+K00025+K00025+K00026+K00026+K00026+K00026+K00026+K00026+K00026+K00026+K00026+K00058+K00058+K00058+K00058+K00133+K00133+K00133+K00133+K00133+K00133+K00133+K00133+K00547+K00547+K00547+K00547+K00548+K00549+K00549+K00549+K00549+K00549+K00549+K00549+K00549+K00549+K00549+K00549+K00549+K00558+K00558+K00640+K00640+K00640+K00640+K00640+K00641+…
Spliceosome	ko03040	132 out of 3435 3.84279475982533%	2578 out of 58977 4.37119555080794%	0.947748	1	Cluster-11528.0;Cluster-30087.0;Cluster-30434.0;Cluster-44281.10876;Cluster-44281.112822;Cluster-44281.119355;Cluster-44281.122854;Cluster-44281.128586;Cluster-44281.140400;Cluster-44281.142486;Cluster-44281.18338;Cluster-44281.18777;Cluster-44281.19705;Cluster-44281.25075;Cluster-44281.25079;Cluster-44281.25080;Cluster-44281.25125;Cluster-44281.25126;Cluster-44281.25128;Cluster-44281.28747;Clust…	K03283+K03283+K03283+K03283+K03283+K03283+K03283+K03283+K03283+K03283+K03283+K03283+K03283+K03283+K03283+K03283+K03283+K03283+K03283+K03283+K03283+K03283+K03283+K03283+K03283+K03283+K03283+K03283+K03283+K03283+K03283+K03283+K03283+K03283+K03283+K03283+K03283+K03283+K10599+K11087+K11091+K11092+K11092+K11094+K11094+K11096+K11098+K11099+K12625+K12625+K12627+K12662+K12741+K12741+K12741+K12741+K12741+…		Pantothenate and CoA biosynthesis	ko00770	45 out of 8252 0.545322346097916%	386 out of 58977 0.654492429252081%	0.921992	1	Cluster-11781.0;Cluster-44281.124987;Cluster-47083.0;Cluster-48767.0;Cluster-55563.0;Cluster-44281.261;Cluster-44281.68140;Cluster-44281.63799;Cluster-44281.20042;Cluster-44281.39936;Cluster-78207.0;Cluster-44281.132239;Cluster-44281.76992;Cluster-44281.104256;Cluster-44281.55484;Cluster-44281.102331;Cluster-44281.104382;Cluster-44281.108476;Cluster-44281.55444;Cluster-44281.57714;Cluster-44281.6…	K00053+K00053+K00053+K00053+K00053+K00077+K00207+K00606+K00826+K00826+K00826+K00859+K01431+K01464+K01464+K01513+K01513+K01513+K01513+K01513+K01513+K01513+K01513+K01598+K01598+K01652+K01652+K01652+K01652+K01652+K01652+K01652+K01653+K01653+K01653+K01687+K01918+K01918+K01922+K01922+K09680+K09680+K09680+K09680+K09680		Fatty acid metabolism	ko01212	97 out of 6519 1.48795827580917%	1023 out of 58977 1.73457449514217%	0.954666	1	Cluster-44281.46203;Cluster-44281.47710;Cluster-44281.47712;Cluster-44281.48873;Cluster-44281.71238;Cluster-44281.71239;Cluster-44281.71241;Cluster-44281.87603;Cluster-44281.92581;Cluster-44281.104663;Cluster-44281.73438;Cluster-44281.79008;Cluster-44281.3394;Cluster-41694.1;Cluster-44281.116;Cluster-44281.83547;Cluster-40385.0;Cluster-44281.51749;Cluster-44281.103282;Cluster-74262.0;Cluster-4428…	K00059+K00059+K00059+K00059+K00059+K00059+K00059+K00059+K00059+K00208+K00232+K00232+K00249+K00507+K00507+K00626+K00645+K00645+K00665+K00665+K00667+K00667+K00668+K00668+K01074+K01897+K01897+K01897+K01897+K01897+K01897+K01897+K01897+K01897+K01897+K01897+K01961+K03921+K03921+K03921+K07512+K07512+K07513+K07513+K07513+K07513+K07513+K07513+K07513+K07513+K07513+K07513+K07513+K07513+K07513+K09458+K09458+…
SNARE interactions in vesicular transport	ko04130	10 out of 3435 0.291120815138282%	266 out of 58977 0.451023280261797%	0.949995	1	Cluster-44281.149918;Cluster-44281.51071;Cluster-44281.92891;Cluster-44281.105381;Cluster-28246.0;Cluster-44281.110733;Cluster-44281.29989;Cluster-44281.59746;Cluster-44281.88439;Cluster-33547.0	K08486+K08486+K08486+K08488+K08489+K08489+K08493+K08493+K08503+K08513		Glycine, serine and threonine metabolism	ko00260	109 out of 8252 1.32089190499273%	880 out of 58977 1.49210709259542%	0.925801	1	Cluster-44281.103326;Cluster-19927.0;Cluster-44281.122491;Cluster-44281.62098;Cluster-44281.12680;Cluster-44281.143687;Cluster-44281.19036;Cluster-44281.45048;Cluster-44281.50893;Cluster-44281.95323;Cluster-21166.0;Cluster-44281.136908;Cluster-44281.107993;Cluster-44281.123805;Cluster-44281.14552;Cluster-44281.18905;Cluster-44281.37144;Cluster-44281.79890;Cluster-44281.87381;Cluster-44281.97933;C…	K00049+K00058+K00058+K00058+K00108+K00108+K00108+K00108+K00108+K00108+K00130+K00130+K00133+K00133+K00133+K00133+K00133+K00133+K00133+K00133+K00276+K00276+K00276+K00276+K00276+K00276+K00276+K00276+K00276+K00276+K00276+K00276+K00276+K00281+K00281+K00281+K00281+K00281+K00281+K00306+K00382+K00382+K00382+K00382+K00600+K00600+K00600+K00600+K00600+K00600+K00600+K00600+K00600+K00600+K00600+K00600+K00600+…		Lysine degradation	ko00310	50 out of 6519 0.766988801963491%	559 out of 58977 0.947827119046408%	0.955434	1	Cluster-27555.0;Cluster-34900.0;Cluster-44281.114692;Cluster-44281.1945;Cluster-44281.33027;Cluster-44281.38718;Cluster-44281.59177;Cluster-44281.62140;Cluster-44281.67186;Cluster-44281.78109;Cluster-44281.79750;Cluster-44281.81549;Cluster-44281.81635;Cluster-44281.85607;Cluster-73178.3;Cluster-44281.62860;Cluster-44281.59821;Cluster-44281.72662;Cluster-44281.73969;Cluster-44281.79063;Cluster-442…	K00128+K00128+K00128+K00128+K00128+K00128+K00128+K00128+K00128+K00128+K00128+K00128+K00128+K00128+K00128+K00306+K00382+K00382+K00382+K00382+K00382+K00626+K11419+K11419+K11419+K11420+K11420+K11420+K11420+K11422+K11422+K11422+K11423+K11423+K11423+K11423+K11430+K11430+K14085+K14085+K14085+K14085+K14085+K14085+K18826+K19199+K19199+K19199+K19199+K22748
Basal transcription factors	ko03022	14 out of 3435 0.407569141193595%	351 out of 58977 0.595147260796582%	0.950506	1	Cluster-44281.134858;Cluster-44281.75442;Cluster-44281.75493;Cluster-44281.64966;Cluster-44281.62031;Cluster-44281.13280;Cluster-44281.13282;Cluster-44281.13283;Cluster-44281.13284;Cluster-46924.0;Cluster-44281.38750;Cluster-44281.73615;Cluster-44281.97635;Cluster-44281.98036	K03120+K03124+K03124+K03126+K03134+K03136+K03136+K03136+K03136+K03136+K03142+K03142+K10843+K14651		Caffeine metabolism	ko00232	4 out of 8252 0.0484730974309258%	49 out of 58977 0.0830832358376994%	0.926038	1	Cluster-44281.104559;Cluster-44281.93980;Cluster-44281.133428;Cluster-64817.0	K00106+K00106+K00365+K07409		Tropane, piperidine and pyridine alkaloid biosynthesis	ko00960	17 out of 6519 0.260776192667587%	218 out of 58977 0.369635620665683%	0.95558	1	Cluster-44281.110831;Cluster-44281.125810;Cluster-44281.126634;Cluster-44281.130448;Cluster-44281.65441;Cluster-44281.65443;Cluster-44281.72684;Cluster-44281.79340;Cluster-44281.98498;Cluster-44281.98702;Cluster-6970.0;Cluster-44281.133977;Cluster-44281.147019;Cluster-40813.0;Cluster-44281.138025;Cluster-44281.49928;Cluster-10621.0	K00276+K00276+K00276+K00276+K00276+K00276+K00276+K00276+K00276+K00276+K00276+K00815+K00815+K08081+K08081+K08081+K14454
Endocytosis	ko04144	97 out of 3435 2.82387190684134%	1947 out of 58977 3.30128694236736%	0.95439	1	Cluster-23272.0;Cluster-44281.126804;Cluster-44281.134555;Cluster-44281.57773;Cluster-63440.0;Cluster-80520.0;Cluster-44281.60622;Cluster-44281.112619;Cluster-44281.59129;Cluster-11528.0;Cluster-30087.0;Cluster-30434.0;Cluster-44281.10876;Cluster-44281.112822;Cluster-44281.119355;Cluster-44281.122854;Cluster-44281.128586;Cluster-44281.140400;Cluster-44281.142486;Cluster-44281.18338;Cluster-44281.…	K00889+K00889+K00889+K00889+K00889+K00889+K01115+K01528+K01528+K03283+K03283+K03283+K03283+K03283+K03283+K03283+K03283+K03283+K03283+K03283+K03283+K03283+K03283+K03283+K03283+K03283+K03283+K03283+K03283+K03283+K03283+K03283+K03283+K03283+K03283+K03283+K03283+K03283+K03283+K03283+K03283+K03283+K03283+K03283+K03283+K03283+K03283+K04513+K04513+K05747+K05747+K05757+K07889+K07897+K07897+K07897+K07901+…		Butanoate metabolism	ko00650	37 out of 8252 0.448376151236064%	326 out of 58977 0.552757854756939%	0.931032	1	Cluster-44281.35788;Cluster-44281.97944;Cluster-44281.104561;Cluster-44281.146243;Cluster-44281.95615;Cluster-44281.99919;Cluster-44281.109847;Cluster-44281.114520;Cluster-44281.101252;Cluster-44281.101253;Cluster-44281.125310;Cluster-44281.12755;Cluster-44281.145868;Cluster-44281.34108;Cluster-44281.43374;Cluster-44281.69868;Cluster-44281.75829;Cluster-44281.75833;Cluster-44281.75836;Cluster-442…	K00109+K00109+K00626+K00626+K00626+K00626+K00656+K00823+K01580+K01580+K01580+K01580+K01580+K01580+K01580+K01580+K01580+K01580+K01580+K01580+K01580+K01580+K01640+K01641+K01641+K01641+K01652+K01652+K01652+K01652+K01652+K01652+K01652+K01653+K01653+K01653+K17761		SNARE interactions in vesicular transport	ko04130	21 out of 6519 0.322135296824666%	266 out of 58977 0.451023280261797%	0.964573	1	Cluster-44281.103701;Cluster-44281.111008;Cluster-44281.118224;Cluster-44281.118225;Cluster-44281.120002;Cluster-44281.149918;Cluster-44281.47834;Cluster-44281.51071;Cluster-44281.54494;Cluster-44281.63295;Cluster-44281.88474;Cluster-44281.93544;Cluster-44281.140317;Cluster-44281.29989;Cluster-44281.59746;Cluster-44281.45055;Cluster-44281.71513;Cluster-44281.112626;Cluster-44281.71491;Cluster-442…	K08486+K08486+K08486+K08486+K08486+K08486+K08486+K08486+K08486+K08486+K08486+K08486+K08492+K08493+K08493+K08497+K08497+K08498+K08506+K08507+K08513
Sulfur relay system	ko04122	2 out of 3435 0.0582241630276565%	82 out of 58977 0.139037251810028%	0.955814	1	Cluster-44281.133427;Cluster-44281.119198	K04487+K14169		One carbon pool by folate	ko00670	29 out of 8252 0.351429956374212%	264 out of 58977 0.447632127778626%	0.937135	1	Cluster-44281.50053;Cluster-44281.122142;Cluster-44281.88203;Cluster-22889.0;Cluster-44281.107975;Cluster-44281.115556;Cluster-44281.126216;Cluster-44281.23712;Cluster-44281.38870;Cluster-44281.40105;Cluster-44281.43802;Cluster-44281.77803;Cluster-44281.80801;Cluster-44281.87708;Cluster-44281.88637;Cluster-44281.89325;Cluster-44281.93602;Cluster-44281.96177;Cluster-44281.96179;Cluster-63550.1;Clu…	K00288+K00297+K00297+K00600+K00600+K00600+K00600+K00600+K00600+K00600+K00600+K00600+K00600+K00600+K00600+K00600+K00600+K00600+K00600+K00600+K00601+K00602+K00605+K01433+K01433+K01934+K01934+K01934+K01938		Phenylalanine metabolism	ko00360	36 out of 6519 0.552231937413714%	425 out of 58977 0.720619902673924%	0.966503	1	Cluster-44281.110831;Cluster-44281.125810;Cluster-44281.126634;Cluster-44281.130448;Cluster-44281.65441;Cluster-44281.65443;Cluster-44281.72684;Cluster-44281.79340;Cluster-44281.98498;Cluster-44281.98702;Cluster-6970.0;Cluster-44281.104880;Cluster-44281.133977;Cluster-44281.147019;Cluster-44281.100724;Cluster-44281.106875;Cluster-44281.113534;Cluster-44281.31324;Cluster-44281.32024;Cluster-44281.…	K00276+K00276+K00276+K00276+K00276+K00276+K00276+K00276+K00276+K00276+K00276+K00457+K00815+K00815+K01426+K01426+K01426+K01426+K01426+K01426+K01426+K01426+K01426+K01593+K01593+K10775+K10775+K10775+K10775+K10775+K10775+K10775+K10775+K10775+K10775+K14454
Pentose phosphate pathway	ko00030	28 out of 3435 0.815138282387191%	640 out of 58977 1.08516879461485%	0.956279	1	Cluster-43564.7;Cluster-44281.10789;Cluster-44281.36955;Cluster-44281.29082;Cluster-44281.98878;Cluster-44281.80530;Cluster-44281.45334;Cluster-44281.98047;Cluster-44281.149170;Cluster-44281.30021;Cluster-44281.58703;Cluster-44281.54904;Cluster-75862.0;Cluster-44281.70513;Cluster-44281.72471;Cluster-44281.73067;Cluster-44281.93855;Cluster-49685.0;Cluster-44281.10873;Cluster-73668.0;Cluster-44281.…	K00033+K00033+K00033+K00036+K00036+K00131+K00615+K00615+K00616+K00850+K00850+K00895+K00948+K01623+K01623+K01623+K01623+K01623+K01624+K01624+K01783+K01807+K01810+K01835+K03841+K03841+K03841+K03841		Folate biosynthesis	ko00790	27 out of 8252 0.327193407658749%	252 out of 58977 0.427285212879597%	0.948763	1	Cluster-44281.58457;Cluster-56886.0;Cluster-26165.0;Cluster-44281.106629;Cluster-44281.62688;Cluster-44281.88960;Cluster-44281.116295;Cluster-44281.135892;Cluster-44281.22554;Cluster-44281.60825;Cluster-44281.10740;Cluster-44281.42355;Cluster-44281.106618;Cluster-44281.61284;Cluster-44281.127463;Cluster-44281.41571;Cluster-44281.50296;Cluster-44281.55388;Cluster-44281.88120;Cluster-44281.67328;Cl…	K00011+K01077+K01113+K01113+K01307+K01495+K01633+K01930+K01930+K01930+K03639+K03639+K13941+K13941+K13950+K13950+K13950+K13950+K13950+K14652+K14652+K15631+K15631+K15631+K15631+K18482+K20457		Mannose type O-glycan biosynthesis	ko00515	1 out of 6519 0.0153397760392698%	30 out of 58977 0.0508672872475711%	0.970251	1	Cluster-44281.35097	K00728
2-Oxocarboxylic acid metabolism	ko01210	45 out of 3435 1.31004366812227%	976 out of 58977 1.65488241178765%	0.959384	1	Cluster-28414.0;Cluster-37464.0;Cluster-44281.91807;Cluster-44281.91873;Cluster-53655.1;Cluster-44281.121113;Cluster-44281.138911;Cluster-44281.66456;Cluster-44281.68097;Cluster-44281.80555;Cluster-50626.0;Cluster-55563.0;Cluster-44281.37144;Cluster-44281.142153;Cluster-44281.26531;Cluster-44281.32203;Cluster-44281.74092;Cluster-44281.74093;Cluster-44281.83368;Cluster-44281.89269;Cluster-44281.57…	K00030+K00030+K00030+K00030+K00030+K00031+K00031+K00031+K00031+K00031+K00052+K00053+K00133+K00145+K00928+K00928+K00928+K00928+K00928+K00930+K01438+K01647+K01647+K01647+K01647+K01652+K01653+K01655+K01655+K01655+K01681+K01681+K01681+K01681+K01681+K01681+K01681+K01681+K01681+K01681+K01704+K12659+K14272+K14677+K14682		Steroid biosynthesis	ko00100	35 out of 8252 0.424139602520601%	318 out of 58977 0.539193244824254%	0.951118	1	Cluster-44281.65339;Cluster-44281.110163;Cluster-11467.0;Cluster-38405.0;Cluster-44281.19213;Cluster-75519.0;Cluster-44281.34027;Cluster-69963.0;Cluster-44281.110204;Cluster-44281.68413;Cluster-44281.68414;Cluster-44281.97492;Cluster-58844.1;Cluster-44281.129101;Cluster-44281.133384;Cluster-44281.44538;Cluster-44281.82597;Cluster-13792.0;Cluster-44281.105620;Cluster-44281.42626;Cluster-44281.6447…	K00213+K00223+K00227+K00227+K00511+K00511+K00559+K00801+K01052+K01052+K01052+K01052+K01052+K01824+K01824+K01824+K01824+K01852+K05917+K05917+K05917+K07748+K07748+K07748+K07748+K07748+K07748+K07750+K07750+K09828+K09828+K09831+K09831+K09832+K14424		Aminoacyl-tRNA biosynthesis	ko00970	68 out of 6519 1.04310477067035%	758 out of 58977 1.28524679112196%	0.973899	1	Cluster-44281.78755;Cluster-44281.56587;Cluster-44281.103779;Cluster-44281.109989;Cluster-44281.111005;Cluster-44281.134898;Cluster-44281.138024;Cluster-44281.14976;Cluster-44281.38739;Cluster-44281.51128;Cluster-44281.52148;Cluster-44281.76487;Cluster-44281.79936;Cluster-44281.83706;Cluster-44281.89091;Cluster-44281.90514;Cluster-44281.142028;Cluster-44281.44492;Cluster-44281.94115;Cluster-44281…	K01867+K01868+K01869+K01870+K01870+K01870+K01870+K01870+K01870+K01870+K01870+K01870+K01870+K01870+K01870+K01870+K01872+K01872+K01872+K01873+K01874+K01874+K01875+K01876+K01876+K01876+K01880+K01881+K01881+K01885+K01886+K01886+K01887+K01887+K01887+K01890+K01892+K01892+K01892+K01892+K01892+K01892+K01893+K01893+K01893+K01893+K01893+K01893+K01893+K02433+K02433+K02433+K02433+K02433+K02433+K02433+K02433+…
Autophagy - other	ko04136	13 out of 3435 0.378457059679767%	341 out of 58977 0.578191498380725%	0.963108	1	Cluster-44281.102276;Cluster-44281.102278;Cluster-44281.101079;Cluster-44281.62172;Cluster-44281.84271;Cluster-44281.37419;Cluster-44281.64826;Cluster-44281.137285;Cluster-1799.0;Cluster-44281.82865;Cluster-44281.97471;Cluster-80565.1;Cluster-44281.51493	K00914+K00914+K04382+K04382+K07204+K08269+K08330+K08331+K08337+K08341+K08341+K08341+K17888		Sulfur relay system	ko04122	7 out of 8252 0.0848279205041202%	82 out of 58977 0.139037251810028%	0.951624	1	Cluster-44281.100536;Cluster-44281.10740;Cluster-44281.42355;Cluster-44281.133427;Cluster-44281.89841;Cluster-44281.95408;Cluster-43722.0	K01011+K03639+K03639+K04487+K11996+K11996+K14171		Autophagy - other	ko04136	27 out of 6519 0.414173953060285%	341 out of 58977 0.578191498380725%	0.977845	1	Cluster-44281.102276;Cluster-44281.103159;Cluster-44281.103982;Cluster-44281.74100;Cluster-41215.0;Cluster-44281.113174;Cluster-44281.28920;Cluster-44281.68399;Cluster-44281.69386;Cluster-44281.77533;Cluster-44281.84431;Cluster-44281.84432;Cluster-44281.16564;Cluster-44281.115412;Cluster-44281.46075;Cluster-44281.64826;Cluster-44281.30333;Cluster-44281.75710;Cluster-44281.63873;Cluster-44281.1044…	K00914+K00914+K00914+K00914+K04382+K04382+K04382+K04382+K04382+K04382+K04382+K04382+K07204+K08266+K08269+K08330+K08331+K08331+K08333+K08334+K08336+K08341+K08341+K08342+K08342+K17606+K17888
Alanine, aspartate and glutamate metabolism	ko00250	36 out of 3435 1.04803493449782%	817 out of 58977 1.38528578937552%	0.969616	1	Cluster-64421.0;Cluster-44281.5542;Cluster-44281.88037;Cluster-44281.95628;Cluster-44281.147877;Cluster-44281.81757;Cluster-44281.87345;Cluster-12215.0;Cluster-44281.90901;Cluster-44281.31213;Cluster-44281.54967;Cluster-44281.65414;Cluster-44281.99847;Cluster-44281.19297;Cluster-44281.44339;Cluster-44281.34108;Cluster-44281.72109;Cluster-44281.1368;Cluster-44281.181;Cluster-44281.26291;Cluster-44…	K00262+K00264+K00264+K00264+K00278+K00278+K00278+K00609+K00764+K00820+K00820+K00820+K00820+K00827+K00830+K01580+K01755+K01915+K01915+K01915+K01915+K01915+K01915+K01915+K01940+K01940+K01953+K01953+K01953+K01955+K01955+K01955+K01955+K11541+K13051+K14272		Non-homologous end-joining	ko03450	4 out of 8252 0.0484730974309258%	56 out of 58977 0.0949522695287994%	0.963319	1	Cluster-44281.107759;Cluster-44281.23166;Cluster-44281.64023;Cluster-44281.42436	K04799+K06642+K06642+K10777		Lysine biosynthesis	ko00300	17 out of 6519 0.260776192667587%	238 out of 58977 0.403547145497397%	0.983615	1	Cluster-44281.107993;Cluster-44281.123805;Cluster-44281.14552;Cluster-44281.18905;Cluster-44281.26635;Cluster-44281.49452;Cluster-44281.79890;Cluster-44281.87381;Cluster-44281.110655;Cluster-44281.32203;Cluster-44281.74092;Cluster-44281.83367;Cluster-44281.83368;Cluster-44281.87119;Cluster-44281.126770;Cluster-44281.105373;Cluster-44281.77962	K00133+K00133+K00133+K00133+K00133+K00133+K00133+K00133+K00928+K00928+K00928+K00928+K00928+K00928+K01586+K01705+K12524
Cysteine and methionine metabolism	ko00270	68 out of 3435 1.97962154294032%	1438 out of 58977 2.43823863540024%	0.971025	1	Cluster-44281.64417;Cluster-44281.67513;Cluster-44281.102708;Cluster-44281.142163;Cluster-14746.0;Cluster-44281.106439;Cluster-44281.120101;Cluster-44281.122511;Cluster-44281.60671;Cluster-44281.92087;Cluster-44281.70201;Cluster-44281.37144;Cluster-44281.68922;Cluster-44281.72749;Cluster-44281.79288;Cluster-44281.44755;Cluster-44281.119019;Cluster-44281.24136;Cluster-44281.103029;Cluster-44281.10…	K00016+K00016+K00025+K00025+K00026+K00026+K00026+K00026+K00026+K00026+K00058+K00133+K00549+K00549+K00549+K00558+K00640+K00640+K00789+K00789+K00789+K00789+K00789+K00797+K00815+K00815+K00816+K00816+K00827+K00831+K00837+K00837+K00928+K00928+K00928+K00928+K00928+K01251+K01251+K01251+K01251+K01251+K01251+K01611+K01738+K01758+K01758+K01760+K01761+K01761+K01762+K01762+K01762+K05933+K05933+K05933+K05933+…		Valine, leucine and isoleucine biosynthesis	ko00290	25 out of 8252 0.302956858943287%	247 out of 58977 0.418807331671669%	0.972047	1	Cluster-50626.0;Cluster-11781.0;Cluster-44281.124987;Cluster-47083.0;Cluster-48767.0;Cluster-55563.0;Cluster-44281.20042;Cluster-44281.39936;Cluster-78207.0;Cluster-29516.0;Cluster-44281.111425;Cluster-44281.127843;Cluster-44281.18364;Cluster-44281.83486;Cluster-50236.1;Cluster-63580.0;Cluster-44281.115811;Cluster-44281.115812;Cluster-44281.149638;Cluster-44281.129962;Cluster-44281.106582;Cluster…	K00052+K00053+K00053+K00053+K00053+K00053+K00826+K00826+K00826+K01652+K01652+K01652+K01652+K01652+K01652+K01652+K01653+K01653+K01653+K01687+K01702+K01702+K01754+K01754+K01754		Synthesis and degradation of ketone bodies	ko00072	7 out of 6519 0.107378432274889%	121 out of 58977 0.20516472523187%	0.984169	1	Cluster-44281.83547;Cluster-44281.89349;Cluster-44281.89350;Cluster-25224.4;Cluster-44281.400;Cluster-44281.49295;Cluster-44281.50546	K00626+K01640+K01640+K01641+K01641+K01641+K01641
Sphingolipid metabolism	ko00600	25 out of 3435 0.727802037845706%	602 out of 58977 1.02073689743459%	0.972566	1	Cluster-44281.20174;Cluster-44281.45881;Cluster-44281.94489;Cluster-44281.112543;Cluster-44281.19287;Cluster-44281.42130;Cluster-44281.148749;Cluster-44281.109170;Cluster-44281.136029;Cluster-44281.102996;Cluster-44281.106027;Cluster-44281.31000;Cluster-44281.74091;Cluster-44281.79399;Cluster-44281.80021;Cluster-44281.83649;Cluster-44281.84046;Cluster-44281.100144;Cluster-44281.120515;Cluster-442…	K00654+K00654+K00654+K04628+K04708+K04708+K04713+K04715+K04715+K07407+K07407+K07407+K07407+K07407+K07407+K07407+K07407+K12309+K12309+K12309+K12309+K12309+K12309+K12309+K12349		Endocytosis	ko04144	243 out of 8252 2.94474066892874%	1947 out of 58977 3.30128694236736%	0.977848	1	Cluster-44281.126804;Cluster-44281.134554;Cluster-44281.134555;Cluster-44281.24386;Cluster-44281.69175;Cluster-44281.70385;Cluster-44281.78470;Cluster-44281.78931;Cluster-44281.78932;Cluster-63440.0;Cluster-33300.0;Cluster-44281.104309;Cluster-44281.13299;Cluster-44281.3237;Cluster-44281.44592;Cluster-44281.60622;Cluster-44281.68183;Cluster-44281.77077;Cluster-44281.91703;Cluster-70968.0;Cluster-…	K00889+K00889+K00889+K00889+K00889+K00889+K00889+K00889+K00889+K00889+K01115+K01115+K01115+K01115+K01115+K01115+K01115+K01115+K01115+K01115+K01528+K01528+K01528+K01528+K03283+K03283+K03283+K03283+K03283+K03283+K03283+K03283+K03283+K03283+K03283+K03283+K03283+K03283+K03283+K03283+K03283+K03283+K03283+K03283+K03283+K03283+K03283+K03283+K03283+K03283+K03283+K03283+K03283+K03283+K03283+K03283+K03283+…		Sulfur relay system	ko04122	4 out of 6519 0.0613591041570793%	82 out of 58977 0.139037251810028%	0.984388	1	Cluster-44281.100536;Cluster-44281.89841;Cluster-44281.95408;Cluster-43722.0	K01011+K11996+K11996+K14171
Fatty acid elongation	ko00062	6 out of 3435 0.174672489082969%	195 out of 58977 0.330637367109212%	0.973297	1	Cluster-44281.8682;Cluster-44281.134165;Cluster-44281.133737;Cluster-44281.18770;Cluster-44281.95543;Cluster-69013.0	K10246+K10249+K15397+K15397+K15397+K15397		Tryptophan metabolism	ko00380	78 out of 8252 0.945225399903054%	686 out of 58977 1.16316530172779%	0.981793	1	Cluster-31771.0;Cluster-34900.0;Cluster-36458.0;Cluster-44281.114692;Cluster-44281.129550;Cluster-44281.142295;Cluster-44281.1945;Cluster-44281.24669;Cluster-44281.37314;Cluster-44281.38718;Cluster-44281.47642;Cluster-44281.5008;Cluster-44281.59177;Cluster-44281.62140;Cluster-44281.67186;Cluster-44281.77665;Cluster-44281.78109;Cluster-44281.81549;Cluster-44281.85607;Cluster-44281.93660;Cluster-73…	K00128+K00128+K00128+K00128+K00128+K00128+K00128+K00128+K00128+K00128+K00128+K00128+K00128+K00128+K00128+K00128+K00128+K00128+K00128+K00128+K00128+K00382+K00382+K00382+K00382+K00486+K00626+K00626+K00626+K00626+K00658+K00658+K00816+K00816+K00816+K00825+K01426+K01426+K01426+K01426+K01426+K01426+K01426+K01426+K01426+K01593+K03781+K03781+K03781+K03781+K03781+K03781+K03781+K03781+K03781+K03781+K03781+…		Homologous recombination	ko03440	36 out of 6519 0.552231937413714%	456 out of 58977 0.773182766163081%	0.989948	1	Cluster-44281.64692;Cluster-44281.64693;Cluster-44281.85264;Cluster-44281.22008;Cluster-44281.112594;Cluster-44281.132548;Cluster-44281.22685;Cluster-44281.79782;Cluster-44281.129877;Cluster-44281.41995;Cluster-44281.94693;Cluster-44281.106466;Cluster-44281.51818;Cluster-44281.103676;Cluster-44281.119742;Cluster-44281.139079;Cluster-44281.19265;Cluster-44281.63966;Cluster-44281.139887;Cluster-683…	K02327+K02327+K02327+K02328+K02335+K02335+K03111+K03111+K03165+K03505+K03505+K03553+K03553+K07466+K07466+K07466+K07466+K07466+K08775+K08991+K10728+K10728+K10728+K10728+K10740+K10869+K10870+K10870+K10875+K10875+K10879+K10901+K11864+K11864+K12173+K12173
Fatty acid biosynthesis	ko00061	21 out of 3435 0.611353711790393%	527 out of 58977 0.893568679315665%	0.976729	1	Cluster-44281.110221;Cluster-44281.118032;Cluster-44281.59627;Cluster-44281.71238;Cluster-44281.92581;Cluster-57552.0;Cluster-44281.51749;Cluster-44281.49890;Cluster-44281.76734;Cluster-44281.96470;Cluster-44281.109094;Cluster-44281.49796;Cluster-44281.117676;Cluster-44281.48244;Cluster-44281.53428;Cluster-44281.54022;Cluster-44281.65841;Cluster-44281.136937;Cluster-44281.60991;Cluster-44281.9037…	K00059+K00059+K00059+K00059+K00059+K00059+K00645+K01897+K01897+K01897+K01963+K01963+K09458+K09458+K09458+K09458+K09458+K10781+K10781+K10781+K10782		ABC transporters	ko02010	131 out of 8252 1.58749394086282%	1102 out of 58977 1.86852501822744%	0.982705	1	Cluster-44281.104348;Cluster-44281.106660;Cluster-44281.131450;Cluster-44281.34015;Cluster-44281.38548;Cluster-44281.67854;Cluster-44281.58488;Cluster-44281.76722;Cluster-44281.79321;Cluster-44281.103432;Cluster-44281.105149;Cluster-44281.107815;Cluster-44281.113494;Cluster-44281.11558;Cluster-44281.116404;Cluster-44281.117935;Cluster-44281.1302;Cluster-44281.1320;Cluster-44281.136486;Cluster-442…	K02045+K02045+K02045+K02045+K02045+K02047+K05643+K05657+K05657+K05658+K05658+K05658+K05658+K05658+K05658+K05658+K05658+K05658+K05658+K05658+K05658+K05658+K05658+K05658+K05658+K05658+K05658+K05658+K05658+K05658+K05658+K05658+K05658+K05658+K05658+K05658+K05658+K05658+K05658+K05658+K05658+K05658+K05658+K05658+K05658+K05658+K05663+K05665+K05665+K05665+K05665+K05665+K05665+K05665+K05665+K05665+K05665+…		DNA replication	ko03030	33 out of 6519 0.506212609295904%	431 out of 58977 0.730793360123438%	0.99263	1	Cluster-17153.0;Cluster-44281.40575;Cluster-44281.64692;Cluster-44281.64693;Cluster-44281.85264;Cluster-44281.22008;Cluster-44281.112594;Cluster-44281.132548;Cluster-44281.81468;Cluster-44281.38758;Cluster-44281.41252;Cluster-44281.51728;Cluster-44281.22685;Cluster-44281.79782;Cluster-44281.54617;Cluster-44281.41995;Cluster-44281.94693;Cluster-44281.104343;Cluster-44281.103676;Cluster-44281.11974…	K02209+K02210+K02327+K02327+K02327+K02328+K02335+K02335+K02540+K02542+K02542+K02685+K03111+K03111+K03469+K03505+K03505+K04799+K07466+K07466+K07466+K07466+K07466+K10740+K10743+K10747+K10747+K10747+K10754+K10755+K10755+K10756+K10756
Nicotinate and nicotinamide metabolism	ko00760	12 out of 3435 0.349344978165939%	338 out of 58977 0.573104769655968%	0.978357	1	Cluster-44281.147877;Cluster-44281.81757;Cluster-44281.87345;Cluster-44281.71582;Cluster-16986.0;Cluster-44281.53607;Cluster-44281.65487;Cluster-44281.110862;Cluster-21872.0;Cluster-44281.111252;Cluster-44281.725;Cluster-44281.94953	K00278+K00278+K00278+K01240+K01513+K01513+K01513+K03426+K03787+K03787+K06210+K18551		Purine metabolism	ko00230	136 out of 8252 1.64808531265148%	1148 out of 58977 1.94652152534039%	0.986036	1	Cluster-44281.140775;Cluster-44281.48503;Cluster-44281.84687;Cluster-44281.96020;Cluster-44281.104559;Cluster-44281.93980;Cluster-44281.133428;Cluster-21758.0;Cluster-44281.65791;Cluster-2755.0;Cluster-44281.92733;Cluster-44281.92734;Cluster-72049.1;Cluster-44281.90901;Cluster-44281.99925;Cluster-44281.114894;Cluster-44281.130913;Cluster-44281.141031;Cluster-44281.46898;Cluster-44281.109579;Clust…	K00088+K00088+K00088+K00088+K00106+K00106+K00365+K00601+K00602+K00759+K00759+K00759+K00759+K00764+K00764+K00856+K00856+K00856+K00860+K00873+K00873+K00873+K00873+K00873+K00873+K00873+K00873+K00873+K00873+K00873+K00873+K00939+K00939+K00939+K00939+K00939+K00939+K00940+K00940+K00940+K00940+K00940+K00940+K00942+K00942+K00942+K00948+K00948+K00948+K00948+K00948+K00951+K00951+K00951+K00951+K00951+K00958+…		Purine metabolism	ko00230	102 out of 6519 1.56465715600552%	1148 out of 58977 1.94652152534039%	0.993381	1	Cluster-33472.0;Cluster-44281.140775;Cluster-44281.48503;Cluster-44281.91129;Cluster-44281.96020;Cluster-44281.56040;Cluster-44281.93980;Cluster-44281.65791;Cluster-44281.59268;Cluster-44281.92734;Cluster-72049.1;Cluster-44281.68583;Cluster-44281.114894;Cluster-44281.130913;Cluster-44281.47379;Cluster-44281.52511;Cluster-44281.59840;Cluster-44281.62851;Cluster-44281.62856;Cluster-44281.75505;Clus…	K00088+K00088+K00088+K00088+K00088+K00106+K00106+K00602+K00759+K00759+K00759+K00764+K00856+K00856+K00873+K00873+K00873+K00873+K00873+K00873+K00873+K00873+K00939+K00939+K00939+K00939+K00939+K00939+K00940+K00940+K00940+K00940+K00940+K00940+K00942+K00942+K00942+K00942+K00948+K00948+K00951+K00951+K00951+K00958+K01081+K01081+K01081+K01466+K01490+K01490+K01510+K01510+K01510+K01513+K01513+K01513+K01513+…
Tyrosine metabolism	ko00350	25 out of 3435 0.727802037845706%	615 out of 58977 1.04277938857521%	0.979513	1	Cluster-56640.0;Cluster-896.0;Cluster-42540.0;Cluster-44281.128771;Cluster-44281.44023;Cluster-4862.0;Cluster-44281.130448;Cluster-44281.133460;Cluster-44281.126844;Cluster-44281.69869;Cluster-44281.121308;Cluster-44281.122724;Cluster-44281.60243;Cluster-44281.107372;Cluster-44281.147019;Cluster-44281.102827;Cluster-44281.40077;Cluster-44281.40079;Cluster-47663.0;Cluster-54029.1;Cluster-44281.120…	K00001+K00001+K00121+K00121+K00121+K00121+K00276+K00422+K00505+K00505+K00545+K00545+K00545+K00815+K00815+K07253+K07253+K07253+K13953+K13953+K18857+K18857+K18857+K18857+K18857		Nicotinate and nicotinamide metabolism	ko00760	34 out of 8252 0.41202132816287%	338 out of 58977 0.573104769655968%	0.987778	1	Cluster-44281.106303;Cluster-44281.106304;Cluster-44281.106306;Cluster-44281.147877;Cluster-44281.28959;Cluster-44281.123113;Cluster-44281.24276;Cluster-44281.29697;Cluster-44281.35383;Cluster-44281.59760;Cluster-44281.59761;Cluster-44281.80419;Cluster-44281.86024;Cluster-44281.102331;Cluster-44281.104382;Cluster-44281.108476;Cluster-44281.55444;Cluster-44281.57714;Cluster-44281.65487;Cluster-442…	K00278+K00278+K00278+K00278+K00323+K01081+K01081+K01081+K01081+K01240+K01240+K01240+K01240+K01513+K01513+K01513+K01513+K01513+K01513+K01513+K01513+K01950+K03517+K03783+K03783+K03787+K03787+K06210+K18550+K18550+K18551+K18551+K18551+K18551		Spliceosome	ko03040	247 out of 6519 3.78892468169965%	2578 out of 58977 4.37119555080794%	0.993994	1	Cluster-11528.0;Cluster-44281.101855;Cluster-44281.10876;Cluster-44281.116639;Cluster-44281.126136;Cluster-44281.127776;Cluster-44281.138919;Cluster-44281.18777;Cluster-44281.22975;Cluster-44281.24558;Cluster-44281.28747;Cluster-44281.29714;Cluster-44281.29719;Cluster-44281.29721;Cluster-44281.30;Cluster-44281.33519;Cluster-44281.39077;Cluster-44281.40352;Cluster-44281.40374;Cluster-44281.43269;C…	K03283+K03283+K03283+K03283+K03283+K03283+K03283+K03283+K03283+K03283+K03283+K03283+K03283+K03283+K03283+K03283+K03283+K03283+K03283+K03283+K03283+K03283+K03283+K03283+K03283+K03283+K03283+K03283+K03283+K03283+K03283+K03283+K03283+K03283+K03283+K03283+K03283+K03283+K03283+K10599+K11086+K11091+K11091+K11093+K11093+K11094+K11094+K11094+K11094+K11094+K11096+K11098+K11098+K11098+K12622+K12622+K12623+…
Steroid biosynthesis	ko00100	11 out of 3435 0.320232896652111%	318 out of 58977 0.539193244824254%	0.979734	1	Cluster-69963.0;Cluster-44281.42216;Cluster-44281.68413;Cluster-58844.1;Cluster-44281.61537;Cluster-12337.0;Cluster-44281.133158;Cluster-44281.87005;Cluster-44281.110674;Cluster-44281.60903;Cluster-44281.77567	K00801+K01052+K01052+K01052+K05917+K07750+K07750+K08246+K14423+K14424+K14424		Ubiquitin mediated proteolysis	ko04120	137 out of 8252 1.66020358700921%	1165 out of 58977 1.97534632144734%	0.989418	1	Cluster-44281.142872;Cluster-44281.118392;Cluster-44281.68406;Cluster-44281.113875;Cluster-44281.72129;Cluster-44281.67855;Cluster-44281.83834;Cluster-44281.123398;Cluster-44281.16258;Cluster-44281.100691;Cluster-44281.112858;Cluster-44281.52814;Cluster-44281.145644;Cluster-66603.0;Cluster-44281.95191;Cluster-44281.105292;Cluster-44281.105293;Cluster-44281.133075;Cluster-44281.133077;Cluster-4428…	K02207+K03094+K03094+K03178+K03178+K03347+K03347+K03350+K03350+K03354+K03354+K03354+K03361+K03362+K03364+K03868+K03868+K03868+K03868+K03868+K03868+K03868+K03868+K03868+K03868+K03868+K03869+K03869+K03872+K03875+K04506+K04506+K04506+K04506+K04506+K04506+K04506+K04506+K04554+K04649+K04649+K06689+K06689+K06689+K06689+K06689+K06689+K06689+K06689+K06689+K06689+K06689+K06689+K06689+K10143+K10143+K10143+…		Nucleotide excision repair	ko03420	43 out of 6519 0.659610369688603%	544 out of 58977 0.922393475422622%	0.994159	1	Cluster-44281.43042;Cluster-54277.0;Cluster-44281.64692;Cluster-44281.64693;Cluster-44281.85264;Cluster-44281.22008;Cluster-44281.112594;Cluster-44281.132548;Cluster-44281.38750;Cluster-44281.73616;Cluster-44281.41995;Cluster-44281.94693;Cluster-44281.29351;Cluster-44281.86784;Cluster-44281.105292;Cluster-44281.133075;Cluster-44281.133077;Cluster-44281.136566;Cluster-44281.19610;Cluster-44281.455…	K02202+K02202+K02327+K02327+K02327+K02328+K02335+K02335+K03142+K03142+K03505+K03505+K03657+K03657+K03868+K03868+K03868+K03868+K03868+K03868+K03868+K07466+K07466+K07466+K07466+K07466+K10570+K10740+K10747+K10747+K10747+K10754+K10755+K10755+K10756+K10756+K10839+K10839+K10840+K10841+K10843+K10844+K10848
Pantothenate and CoA biosynthesis	ko00770	14 out of 3435 0.407569141193595%	386 out of 58977 0.654492429252081%	0.980856	1	Cluster-55563.0;Cluster-44281.68140;Cluster-44281.29682;Cluster-44281.18385;Cluster-44281.76992;Cluster-44281.104256;Cluster-16986.0;Cluster-44281.53607;Cluster-44281.65487;Cluster-44281.18364;Cluster-44281.149638;Cluster-44281.113852;Cluster-44281.27319;Cluster-44281.67273	K00053+K00207+K00606+K00859+K01431+K01464+K01513+K01513+K01513+K01652+K01653+K06133+K06133+K09680		Lysine biosynthesis	ko00300	22 out of 8252 0.266602035870092%	238 out of 58977 0.403547145497397%	0.9897	1	Cluster-44281.107993;Cluster-44281.123805;Cluster-44281.14552;Cluster-44281.18905;Cluster-44281.37144;Cluster-44281.79890;Cluster-44281.87381;Cluster-44281.97933;Cluster-47205.0;Cluster-44281.39013;Cluster-44281.26531;Cluster-44281.83367;Cluster-44281.87119;Cluster-43815.1;Cluster-35410.0;Cluster-43036.0;Cluster-44281.7235;Cluster-44281.105373;Cluster-44281.57889;Cluster-44281.110531;Cluster-4428…	K00133+K00133+K00133+K00133+K00133+K00133+K00133+K00133+K00290+K00825+K00928+K00928+K00928+K01586+K01655+K01655+K01655+K01705+K01714+K12524+K12524+K17450		Peroxisome	ko04146	95 out of 6519 1.45727872373063%	1085 out of 58977 1.83970022212049%	0.994701	1	Cluster-44281.138911;Cluster-44281.68097;Cluster-44281.56040;Cluster-44281.93980;Cluster-44281.73438;Cluster-44281.79008;Cluster-44281.62860;Cluster-44281.73958;Cluster-44281.58841;Cluster-44281.94332;Cluster-44281.149404;Cluster-44281.31393;Cluster-44281.89349;Cluster-44281.89350;Cluster-44281.123445;Cluster-44281.142396;Cluster-44281.28931;Cluster-44281.38097;Cluster-44281.53800;Cluster-44281.7…	K00031+K00031+K00106+K00106+K00232+K00232+K00306+K00477+K00830+K00830+K00869+K00869+K01640+K01640+K01897+K01897+K01897+K01897+K01897+K01897+K01897+K01897+K01897+K01897+K01897+K03781+K03781+K03781+K03781+K03781+K03781+K03781+K03781+K03781+K04564+K04564+K04564+K04565+K04565+K04565+K05677+K07513+K07513+K07513+K07513+K07513+K07513+K07513+K07513+K07513+K07513+K07513+K07513+K07513+K08726+K08726+K08726+…
Sulfur metabolism	ko00920	14 out of 3435 0.407569141193595%	390 out of 58977 0.661274734218424%	0.982929	1	Cluster-44281.41534;Cluster-49707.0;Cluster-44281.51407;Cluster-58661.0;Cluster-44281.119019;Cluster-44281.24136;Cluster-44281.114301;Cluster-44281.133255;Cluster-44281.113393;Cluster-44281.120866;Cluster-44281.49242;Cluster-44281.54992;Cluster-44281.42947;Cluster-32563.0	K00380+K00380+K00381+K00387+K00640+K00640+K00988+K00988+K01082+K01082+K01082+K01082+K01738+K17069		RNA degradation	ko03018	138 out of 8252 1.67232186136694%	1174 out of 58977 1.99060650762162%	0.989803	1	Cluster-44281.103569;Cluster-44281.30021;Cluster-44281.41416;Cluster-44281.48007;Cluster-44281.53191;Cluster-44281.57013;Cluster-44281.58703;Cluster-44281.58704;Cluster-44281.58705;Cluster-44281.65714;Cluster-44281.70620;Cluster-44281.79033;Cluster-44281.93351;Cluster-44281.98779;Cluster-44281.99135;Cluster-44281.96407;Cluster-44281.144392;Cluster-44281.116603;Cluster-44281.139901;Cluster-44281.1…	K00850+K00850+K00850+K00850+K00850+K00850+K00850+K00850+K00850+K00850+K00850+K00850+K00850+K00850+K00850+K00937+K00962+K01148+K01148+K01148+K01148+K01148+K01148+K01148+K01148+K01148+K01148+K01689+K01689+K01689+K01689+K01689+K01689+K01689+K01689+K01689+K01689+K03514+K03514+K03514+K03514+K03514+K03514+K03654+K04043+K04043+K04043+K04043+K04043+K04043+K04077+K04077+K04077+K04077+K04077+K04077+K04077+…		Porphyrin and chlorophyll metabolism	ko00860	32 out of 6519 0.490872833256634%	430 out of 58977 0.729097783881852%	0.995282	1	Cluster-44281.59567;Cluster-44281.77301;Cluster-44281.77302;Cluster-44281.59325;Cluster-44281.114487;Cluster-44281.124952;Cluster-44281.42891;Cluster-44281.51788;Cluster-44281.99076;Cluster-44281.101872;Cluster-44281.63750;Cluster-44281.87237;Cluster-44281.47335;Cluster-44281.123544;Cluster-44281.77476;Cluster-44281.104008;Cluster-44281.52010;Cluster-44281.93661;Cluster-44281.93663;Cluster-44281.…	K00218+K00228+K00228+K01599+K01885+K02259+K02259+K02303+K02303+K02492+K02492+K02492+K03403+K03404+K03405+K03428+K08099+K13071+K13071+K13544+K13544+K13544+K13544+K13600+K18010+K19073+K21480+K21480+K21480+K21480+K22013+K22013
RNA degradation	ko03018	51 out of 3435 1.48471615720524%	1174 out of 58977 1.99060650762162%	0.990185	1	Cluster-44281.30021;Cluster-44281.58703;Cluster-44281.106269;Cluster-44281.41849;Cluster-44281.59295;Cluster-44281.78702;Cluster-44281.78703;Cluster-44281.135412;Cluster-44281.75269;Cluster-44281.75270;Cluster-44281.76932;Cluster-44281.89520;Cluster-44281.100266;Cluster-44281.97271;Cluster-44281.38269;Cluster-44281.25094;Cluster-58925.3;Cluster-44281.79333;Cluster-44281.57666;Cluster-44281.139251…	K00850+K00850+K01148+K01148+K01148+K01148+K01148+K01689+K01689+K01689+K03514+K03514+K03679+K03679+K03681+K04043+K04043+K04077+K07573+K10643+K11600+K12580+K12589+K12589+K12598+K12600+K12603+K12604+K12614+K12614+K12616+K12616+K12619+K12619+K12619+K12625+K12625+K12627+K13126+K13126+K13126+K13126+K13126+K13126+K13126+K13126+K13126+K13126+K13126+K14442+K18681		Nucleotide excision repair	ko03420	58 out of 8252 0.702859912748425%	544 out of 58977 0.922393475422622%	0.991435	1	Cluster-44281.64692;Cluster-44281.64693;Cluster-44281.85264;Cluster-44281.98079;Cluster-44281.30161;Cluster-44281.30170;Cluster-44281.46172;Cluster-44281.46173;Cluster-44281.84758;Cluster-44281.106579;Cluster-44281.112594;Cluster-44281.15524;Cluster-44281.77850;Cluster-44281.84110;Cluster-44281.41995;Cluster-44281.94693;Cluster-44281.52925;Cluster-44281.64798;Cluster-44281.98082;Cluster-44281.980…	K02327+K02327+K02327+K02327+K02328+K02328+K02328+K02328+K02328+K02335+K02335+K02335+K03143+K03143+K03505+K03505+K03657+K03657+K03657+K03657+K03702+K03868+K03868+K03868+K03868+K03868+K03868+K03868+K03868+K03868+K03868+K03868+K07466+K07466+K07466+K10570+K10610+K10740+K10747+K10754+K10755+K10755+K10756+K10838+K10838+K10839+K10839+K10839+K10839+K10839+K10839+K10841+K10843+K10844+K10844+K10848+K10848+…		RNA degradation	ko03018	103 out of 6519 1.57999693204479%	1174 out of 58977 1.99060650762162%	0.995811	1	Cluster-44281.118402;Cluster-44281.28895;Cluster-44281.30021;Cluster-44281.41416;Cluster-44281.48007;Cluster-44281.53191;Cluster-44281.57013;Cluster-44281.58704;Cluster-44281.65713;Cluster-44281.65714;Cluster-44281.70620;Cluster-44281.79033;Cluster-44281.93351;Cluster-44281.98779;Cluster-44281.99135;Cluster-44281.108852;Cluster-44281.116603;Cluster-44281.16608;Cluster-44281.16837;Cluster-44281.78…	K00850+K00850+K00850+K00850+K00850+K00850+K00850+K00850+K00850+K00850+K00850+K00850+K00850+K00850+K00850+K01148+K01148+K01148+K01148+K01148+K01689+K01689+K01689+K01689+K01689+K01689+K01689+K01689+K01689+K01689+K01689+K03514+K03514+K03514+K03514+K03514+K03514+K03679+K03679+K03679+K03681+K04043+K04043+K04077+K04077+K04077+K04077+K04077+K04077+K04077+K04077+K04077+K04077+K04077+K04077+K04077+K04077+…
Mismatch repair	ko03430	11 out of 3435 0.320232896652111%	347 out of 58977 0.588364955830239%	0.99199	1	Cluster-44281.22685;Cluster-44281.116132;Cluster-44281.119742;Cluster-44281.65152;Cluster-44281.78721;Cluster-44281.37577;Cluster-44281.87575;Cluster-44281.23681;Cluster-44281.34398;Cluster-44281.85148;Cluster-44281.28171	K03111+K07456+K07466+K07466+K08734+K08737+K08737+K10746+K10747+K10754+K10858		Aminoacyl-tRNA biosynthesis	ko00970	84 out of 8252 1.01793504604944%	758 out of 58977 1.28524679112196%	0.992685	1	Cluster-44281.59467;Cluster-44281.135914;Cluster-44281.56587;Cluster-44281.111426;Cluster-44281.15296;Cluster-44281.75239;Cluster-44281.109989;Cluster-44281.111005;Cluster-44281.114060;Cluster-44281.134898;Cluster-44281.138024;Cluster-44281.14976;Cluster-44281.26571;Cluster-44281.38739;Cluster-44281.51128;Cluster-44281.52148;Cluster-44281.73391;Cluster-44281.76487;Cluster-44281.76898;Cluster-4428…	K01866+K01868+K01868+K01869+K01869+K01869+K01870+K01870+K01870+K01870+K01870+K01870+K01870+K01870+K01870+K01870+K01870+K01870+K01870+K01872+K01872+K01872+K01872+K01872+K01872+K01872+K01873+K01873+K01873+K01873+K01874+K01874+K01874+K01875+K01875+K01876+K01876+K01876+K01881+K01881+K01881+K01881+K01883+K01885+K01886+K01886+K01887+K01887+K01887+K01890+K01892+K01892+K01892+K01892+K01893+K01893+K01893+…		Protein export	ko03060	25 out of 6519 0.383494400981746%	355 out of 58977 0.601929565762925%	0.995895	1	Cluster-44281.73658;Cluster-44281.79766;Cluster-44281.77018;Cluster-44281.77022;Cluster-44281.95640;Cluster-44281.19357;Cluster-44281.75756;Cluster-70870.0;Cluster-44281.34547;Cluster-61207.0;Cluster-32614.0;Cluster-44281.110272;Cluster-44281.113362;Cluster-44281.75222;Cluster-44281.84148;Cluster-44281.89086;Cluster-44281.73352;Cluster-44281.16693;Cluster-44281.91920;Cluster-63147.1;Cluster-30656…	K03070+K03070+K03100+K03100+K03100+K03110+K03217+K07342+K09481+K09481+K09490+K09490+K09490+K09490+K09490+K09490+K09647+K09648+K10956+K10956+K12275+K12946+K12947+K13431+K13431
Phagosome	ko04145	35 out of 3435 1.01892285298399%	870 out of 58977 1.47515133017956%	0.993267	1	Cluster-44281.102276;Cluster-44281.102278;Cluster-12002.0;Cluster-44281.108828;Cluster-44281.83034;Cluster-44281.69910;Cluster-44281.62441;Cluster-63736.1;Cluster-44281.137393;Cluster-44281.5082;Cluster-52737.0;Cluster-44281.122902;Cluster-80872.0;Cluster-44281.120533;Cluster-44281.15681;Cluster-44281.15682;Cluster-44281.27687;Cluster-44281.28203;Cluster-44281.30460;Cluster-44281.64158;Cluster-44…	K00914+K00914+K00921+K00921+K00921+K02144+K02155+K04392+K05692+K05692+K05692+K07374+K07374+K07375+K07375+K07375+K07375+K07375+K07375+K07375+K07375+K07375+K07375+K07889+K07897+K07897+K07897+K08054+K08057+K08488+K09481+K10956+K10956+K10956+K12182		Phenylalanine metabolism	ko00360	43 out of 8252 0.521085797382453%	425 out of 58977 0.720619902673924%	0.99327	1	Cluster-44281.12532;Cluster-44281.125810;Cluster-44281.126634;Cluster-44281.130448;Cluster-44281.47960;Cluster-44281.58281;Cluster-44281.61740;Cluster-44281.72684;Cluster-44281.79340;Cluster-44281.98497;Cluster-44281.98498;Cluster-44281.98702;Cluster-6970.0;Cluster-44281.41760;Cluster-44281.107372;Cluster-44281.133977;Cluster-38307.0;Cluster-44281.100724;Cluster-44281.10210;Cluster-44281.113534;C…	K00276+K00276+K00276+K00276+K00276+K00276+K00276+K00276+K00276+K00276+K00276+K00276+K00276+K00457+K00815+K00815+K01426+K01426+K01426+K01426+K01426+K01426+K01426+K01426+K01426+K01593+K03782+K03782+K07253+K10775+K10775+K10775+K10775+K10775+K10775+K10775+K10775+K10775+K14454+K14454+K14454+K14455+K15849		C5-Branched dibasic acid metabolism	ko00660	4 out of 6519 0.0613591041570793%	99 out of 58977 0.167862047916985%	0.996439	1	Cluster-44281.9270;Cluster-44281.127843;Cluster-44281.115812;Cluster-44281.123686	K00052+K01652+K01653+K01704
Base excision repair	ko03410	8 out of 3435 0.232896652110626%	296 out of 58977 0.501890567509368%	0.996216	1	Cluster-44281.85244;Cluster-44281.46692;Cluster-44281.15524;Cluster-44281.76325;Cluster-44281.34398;Cluster-54270.0;Cluster-44281.112330;Cluster-8140.1	K01142+K01246+K02335+K03575+K10747+K10773+K10798+K10802		Lysine degradation	ko00310	59 out of 8252 0.714978187106156%	559 out of 58977 0.947827119046408%	0.9937	1	Cluster-31771.0;Cluster-34900.0;Cluster-36458.0;Cluster-44281.114692;Cluster-44281.129550;Cluster-44281.142295;Cluster-44281.1945;Cluster-44281.24669;Cluster-44281.37314;Cluster-44281.38718;Cluster-44281.47642;Cluster-44281.5008;Cluster-44281.59177;Cluster-44281.62140;Cluster-44281.67186;Cluster-44281.77665;Cluster-44281.78109;Cluster-44281.81549;Cluster-44281.85607;Cluster-44281.93660;Cluster-73…	K00128+K00128+K00128+K00128+K00128+K00128+K00128+K00128+K00128+K00128+K00128+K00128+K00128+K00128+K00128+K00128+K00128+K00128+K00128+K00128+K00128+K00290+K00306+K00382+K00382+K00382+K00382+K00626+K00626+K00626+K00626+K00658+K00658+K00825+K11419+K11419+K11420+K11420+K11420+K11420+K11420+K11420+K11420+K11420+K11422+K11422+K11422+K11423+K11423+K11423+K11423+K11423+K11430+K11430+K14085+K14085+K14085+…		Pyruvate metabolism	ko00620	135 out of 6519 2.07086976530143%	1518 out of 58977 2.5738847347271%	0.997713	1	Cluster-33640.0;Cluster-40207.0;Cluster-44281.64417;Cluster-44281.102708;Cluster-44281.112754;Cluster-44281.144284;Cluster-44281.30194;Cluster-44281.46947;Cluster-44281.66123;Cluster-44281.71427;Cluster-44281.71428;Cluster-44281.106439;Cluster-44281.106440;Cluster-44281.115888;Cluster-44281.47533;Cluster-44281.50548;Cluster-44281.91907;Cluster-44281.92087;Cluster-54345.1;Cluster-54345.3;Cluster-4…	K00016+K00016+K00016+K00025+K00025+K00025+K00025+K00025+K00025+K00025+K00025+K00026+K00026+K00026+K00026+K00026+K00026+K00026+K00026+K00026+K00028+K00029+K00029+K00029+K00029+K00029+K00029+K00029+K00029+K00029+K00029+K00029+K00029+K00029+K00029+K00029+K00029+K00029+K00029+K00029+K00029+K00029+K00051+K00051+K00102+K00102+K00128+K00128+K00128+K00128+K00128+K00128+K00128+K00128+K00128+K00128+K00128+…
Valine, leucine and isoleucine biosynthesis	ko00290	6 out of 3435 0.174672489082969%	247 out of 58977 0.418807331671669%	0.996545	1	Cluster-50626.0;Cluster-55563.0;Cluster-44281.18364;Cluster-44281.149638;Cluster-44281.123686;Cluster-44281.128619	K00052+K00053+K01652+K01653+K01704+K01754		Mismatch repair	ko03430	33 out of 8252 0.399903053805138%	347 out of 58977 0.588364955830239%	0.995423	1	Cluster-44281.64692;Cluster-44281.64693;Cluster-44281.85264;Cluster-44281.98079;Cluster-44281.30161;Cluster-44281.30170;Cluster-44281.46172;Cluster-44281.46173;Cluster-44281.84758;Cluster-44281.79782;Cluster-44281.41995;Cluster-44281.94693;Cluster-44281.52925;Cluster-44281.64798;Cluster-44281.98082;Cluster-44281.98086;Cluster-44281.116132;Cluster-44281.29456;Cluster-50097.0;Cluster-44281.139079;C…	K02327+K02327+K02327+K02327+K02328+K02328+K02328+K02328+K02328+K03111+K03505+K03505+K03657+K03657+K03657+K03657+K07456+K07456+K07456+K07466+K07466+K07466+K08734+K08737+K08737+K08737+K10740+K10747+K10754+K10755+K10755+K10756+K10858		AGE-RAGE signaling pathway in diabetic complications	ko04933	19 out of 6519 0.291455744746127%	297 out of 58977 0.503586143750954%	0.997765	1	Cluster-44281.91360;Cluster-44281.118060;Cluster-44281.103826;Cluster-44281.51713;Cluster-44281.30183;Cluster-44281.45974;Cluster-44281.46414;Cluster-44281.80906;Cluster-44281.83212;Cluster-44281.39458;Cluster-44281.39460;Cluster-44281.65590;Cluster-44281.68026;Cluster-44281.71309;Cluster-44281.82437;Cluster-44281.87038;Cluster-44281.95686;Cluster-44281.143152;Cluster-44281.58366	K04371+K04392+K05740+K05740+K05857+K05857+K05857+K05857+K05857+K06236+K06236+K06236+K06236+K06236+K06236+K06236+K06236+K19720+K19720
Butanoate metabolism	ko00650	9 out of 3435 0.262008733624454%	326 out of 58977 0.552757854756939%	0.996879	1	Cluster-44281.35788;Cluster-44281.146243;Cluster-44281.95615;Cluster-44281.34108;Cluster-25224.4;Cluster-44281.400;Cluster-44281.50546;Cluster-44281.18364;Cluster-44281.149638	K00109+K00626+K00626+K01580+K01641+K01641+K01641+K01652+K01653		Aflatoxin biosynthesis	ko00254	2 out of 8252 0.0242365487154629%	51 out of 58977 0.0864743883208708%	0.995747	1	Cluster-44281.126815;Cluster-55711.0	K11262+K11262		Sulfur metabolism	ko00920	26 out of 6519 0.398834177021015%	390 out of 58977 0.661274734218424%	0.998811	1	Cluster-44281.56513;Cluster-44281.97451;Cluster-44281.125752;Cluster-44281.119019;Cluster-44281.121313;Cluster-44281.24136;Cluster-44281.39955;Cluster-44281.45067;Cluster-3497.0;Cluster-44281.13004;Cluster-44281.100536;Cluster-44281.110635;Cluster-44281.137568;Cluster-44281.49242;Cluster-44281.49243;Cluster-44281.49244;Cluster-44281.52179;Cluster-44281.71930;Cluster-44281.63433;Cluster-44281.6339…	K00387+K00387+K00390+K00640+K00640+K00640+K00640+K00640+K00641+K00958+K01011+K01082+K01082+K01082+K01082+K01082+K01738+K01738+K13034+K13811+K13811+K13811+K13811+K13811+K17285+K22966
Phenylalanine metabolism	ko00360	13 out of 3435 0.378457059679767%	425 out of 58977 0.720619902673924%	0.997166	1	Cluster-44281.130448;Cluster-44281.107372;Cluster-44281.147019;Cluster-38307.0;Cluster-44281.47739;Cluster-44281.88715;Cluster-24215.0;Cluster-44281.102827;Cluster-44281.40077;Cluster-44281.40079;Cluster-44281.111418;Cluster-44281.64078;Cluster-44281.95153	K00276+K00815+K00815+K01426+K01426+K01426+K03782+K07253+K07253+K07253+K10775+K10775+K10775		Autophagy - other	ko04136	32 out of 8252 0.387784779447407%	341 out of 58977 0.578191498380725%	0.996092	1	Cluster-44281.103982;Cluster-44281.74100;Cluster-44281.74101;Cluster-41215.0;Cluster-44281.28920;Cluster-44281.69386;Cluster-44281.77533;Cluster-44281.77537;Cluster-44281.84431;Cluster-44281.16564;Cluster-44281.66606;Cluster-44281.95921;Cluster-44281.115412;Cluster-44281.105460;Cluster-44281.61164;Cluster-44281.30333;Cluster-44281.75710;Cluster-44281.104425;Cluster-44281.37612;Cluster-1799.0;Clus…	K00914+K00914+K00914+K04382+K04382+K04382+K04382+K04382+K04382+K07204+K07204+K07204+K08266+K08269+K08330+K08331+K08331+K08334+K08336+K08337+K08337+K08339+K08341+K08341+K08341+K08342+K08342+K08342+K17606+K17890+K17908+K17908		ABC transporters	ko02010	91 out of 6519 1.39591961957355%	1102 out of 58977 1.86852501822744%	0.999184	1	Cluster-44281.27517;Cluster-44281.58488;Cluster-44281.98968;Cluster-44281.105149;Cluster-44281.108310;Cluster-44281.111395;Cluster-44281.113494;Cluster-44281.11558;Cluster-44281.116404;Cluster-44281.143068;Cluster-44281.19532;Cluster-44281.27668;Cluster-44281.27669;Cluster-44281.30835;Cluster-44281.35112;Cluster-44281.39937;Cluster-44281.4328;Cluster-44281.43567;Cluster-44281.46238;Cluster-44281.…	K05643+K05643+K05643+K05658+K05658+K05658+K05658+K05658+K05658+K05658+K05658+K05658+K05658+K05658+K05658+K05658+K05658+K05658+K05658+K05658+K05658+K05658+K05658+K05658+K05658+K05658+K05658+K05658+K05658+K05658+K05658+K05658+K05658+K05663+K05665+K05665+K05665+K05665+K05665+K05665+K05665+K05665+K05665+K05666+K05666+K05666+K05666+K05666+K05666+K05666+K05666+K05666+K05666+K05666+K05666+K05666+K05666+…
Homologous recombination	ko03440	14 out of 3435 0.407569141193595%	456 out of 58977 0.773182766163081%	0.997793	1	Cluster-44281.15524;Cluster-44281.22685;Cluster-44281.114087;Cluster-44281.119742;Cluster-44281.65152;Cluster-32860.0;Cluster-44281.2980;Cluster-44281.115238;Cluster-44281.54543;Cluster-44281.62331;Cluster-43930.0;Cluster-44281.51408;Cluster-44281.51101;Cluster-44281.54176	K02335+K03111+K04728+K07466+K07466+K08775+K10683+K10870+K10875+K10875+K10901+K11864+K12173+K12173		Synthesis and degradation of ketone bodies	ko00072	8 out of 8252 0.0969461948618517%	121 out of 58977 0.20516472523187%	0.996524	1	Cluster-44281.104561;Cluster-44281.146243;Cluster-44281.95615;Cluster-44281.99919;Cluster-44281.89349;Cluster-25224.4;Cluster-44281.400;Cluster-44281.49295	K00626+K00626+K00626+K00626+K01640+K01641+K01641+K01641		Butanoate metabolism	ko00650	20 out of 6519 0.306795520785397%	326 out of 58977 0.552757854756939%	0.999187	1	Cluster-44281.61170;Cluster-44281.66759;Cluster-44281.83547;Cluster-44281.101253;Cluster-44281.113429;Cluster-44281.12755;Cluster-44281.69868;Cluster-44281.75829;Cluster-44281.75833;Cluster-44281.75836;Cluster-44281.75837;Cluster-44281.79210;Cluster-44281.89349;Cluster-44281.89350;Cluster-25224.4;Cluster-44281.400;Cluster-44281.49295;Cluster-44281.50546;Cluster-44281.127843;Cluster-44281.115812	K00109+K00109+K00626+K01580+K01580+K01580+K01580+K01580+K01580+K01580+K01580+K01580+K01640+K01640+K01641+K01641+K01641+K01641+K01652+K01653
RNA transport	ko03013	137 out of 3435 3.98835516739447%	2944 out of 58977 4.99177645522831%	0.998167	1	Cluster-33526.0;Cluster-33527.0;Cluster-44281.104574;Cluster-44281.112607;Cluster-44281.124981;Cluster-67010.5;Cluster-4320.0;Cluster-44281.106547;Cluster-44281.33114;Cluster-44281.40372;Cluster-44281.88421;Cluster-13818.0;Cluster-44281.102705;Cluster-44281.104232;Cluster-44281.105790;Cluster-44281.108868;Cluster-44281.111603;Cluster-44281.111935;Cluster-44281.118995;Cluster-44281.119576;Cluster-…	K00784+K00784+K00784+K00784+K00784+K00784+K03113+K03113+K03113+K03113+K03113+K03231+K03231+K03231+K03231+K03231+K03231+K03231+K03231+K03231+K03231+K03231+K03231+K03231+K03231+K03231+K03231+K03231+K03231+K03231+K03231+K03231+K03231+K03231+K03231+K03231+K03231+K03231+K03231+K03231+K03231+K03231+K03231+K03231+K03231+K03231+K03236+K03236+K03238+K03239+K03239+K03240+K03240+K03240+K03242+K03242+K03242+…		Alanine, aspartate and glutamate metabolism	ko00250	88 out of 8252 1.06640814348037%	817 out of 58977 1.38528578937552%	0.997515	1	Cluster-44281.28890;Cluster-44281.52683;Cluster-44281.97416;Cluster-44281.99432;Cluster-44281.86942;Cluster-44281.98080;Cluster-64421.0;Cluster-44281.46900;Cluster-44281.5543;Cluster-44281.5544;Cluster-44281.87686;Cluster-44281.88037;Cluster-44281.106303;Cluster-44281.106304;Cluster-44281.106306;Cluster-44281.147877;Cluster-44281.90901;Cluster-44281.99925;Cluster-22304.0;Cluster-44281.37299;Clust…	K00261+K00261+K00261+K00261+K00262+K00262+K00262+K00264+K00264+K00264+K00264+K00264+K00278+K00278+K00278+K00278+K00764+K00764+K00814+K00814+K00814+K00820+K00820+K00820+K00820+K00823+K00827+K00827+K00830+K01580+K01580+K01580+K01580+K01580+K01580+K01580+K01580+K01580+K01580+K01580+K01580+K01580+K01580+K01755+K01756+K01756+K01915+K01915+K01915+K01915+K01915+K01915+K01915+K01915+K01915+K01915+K01915+…		Basal transcription factors	ko03022	22 out of 6519 0.337475072863936%	351 out of 58977 0.595147260796582%	0.999237	1	Cluster-44281.43042;Cluster-54277.0;Cluster-44281.82805;Cluster-56333.0;Cluster-44281.74854;Cluster-44281.75442;Cluster-44281.75453;Cluster-44281.75493;Cluster-58241.0;Cluster-44281.65813;Cluster-44281.45181;Cluster-44281.13280;Cluster-44281.13282;Cluster-44281.13283;Cluster-44281.13284;Cluster-44281.107249;Cluster-44281.42770;Cluster-44281.38750;Cluster-44281.73616;Cluster-44281.97635;Cluster-44…	K02202+K02202+K03120+K03120+K03124+K03124+K03124+K03124+K03130+K03134+K03135+K03136+K03136+K03136+K03136+K03137+K03139+K03142+K03142+K10843+K10844+K14651
Propanoate metabolism	ko00640	21 out of 3435 0.611353711790393%	628 out of 58977 1.06482187971582%	0.998465	1	Cluster-44281.64417;Cluster-44281.67513;Cluster-44281.73438;Cluster-44281.72662;Cluster-44281.78168;Cluster-44281.79063;Cluster-44281.84582;Cluster-44281.146243;Cluster-44281.95615;Cluster-44281.119483;Cluster-44281.90381;Cluster-77445.0;Cluster-77445.1;Cluster-44281.27752;Cluster-33367.0;Cluster-44281.109094;Cluster-44281.49796;Cluster-44281.112332;Cluster-44281.113478;Cluster-44281.83154;Cluste…	K00016+K00016+K00232+K00382+K00382+K00382+K00382+K00626+K00626+K01578+K01895+K01895+K01895+K01899+K01900+K01963+K01963+K05605+K05605+K05605+K09699		Pyruvate metabolism	ko00620	175 out of 8252 2.12069801260301%	1518 out of 58977 2.5738847347271%	0.998174	1	Cluster-33640.0;Cluster-44281.8616;Cluster-44281.100235;Cluster-44281.112754;Cluster-44281.130408;Cluster-44281.142186;Cluster-44281.144284;Cluster-44281.30194;Cluster-44281.46947;Cluster-44281.48123;Cluster-44281.66123;Cluster-44281.71427;Cluster-44281.71428;Cluster-14746.0;Cluster-44281.10119;Cluster-44281.106440;Cluster-44281.112351;Cluster-44281.115888;Cluster-44281.47533;Cluster-44281.50548;…	K00016+K00016+K00025+K00025+K00025+K00025+K00025+K00025+K00025+K00025+K00025+K00025+K00025+K00026+K00026+K00026+K00026+K00026+K00026+K00026+K00026+K00026+K00026+K00026+K00028+K00029+K00029+K00029+K00029+K00029+K00029+K00029+K00029+K00029+K00029+K00029+K00029+K00029+K00029+K00029+K00029+K00029+K00029+K00029+K00029+K00049+K00101+K00101+K00102+K00102+K00128+K00128+K00128+K00128+K00128+K00128+K00128+…		Alanine, aspartate and glutamate metabolism	ko00250	62 out of 6519 0.951066114434729%	817 out of 58977 1.38528578937552%	0.999657	1	Cluster-44281.28890;Cluster-44281.52683;Cluster-44281.84004;Cluster-44281.97416;Cluster-44281.99432;Cluster-44281.87686;Cluster-44281.106303;Cluster-44281.106304;Cluster-44281.115518;Cluster-44281.30937;Cluster-44281.87345;Cluster-44281.98636;Cluster-12215.0;Cluster-28223.0;Cluster-44281.68583;Cluster-44281.137137;Cluster-44281.31213;Cluster-44281.54967;Cluster-44281.65414;Cluster-44281.84606;Clu…	K00261+K00261+K00261+K00261+K00261+K00264+K00278+K00278+K00278+K00278+K00278+K00294+K00609+K00609+K00764+K00820+K00820+K00820+K00820+K00820+K00820+K00820+K00827+K00827+K00827+K00827+K00830+K00830+K01580+K01580+K01580+K01580+K01580+K01580+K01580+K01580+K01580+K01756+K01915+K01915+K01915+K01915+K01915+K01915+K01915+K01915+K01940+K01940+K01940+K01940+K01940+K01940+K01940+K01940+K01953+K01953+K01955+…
Ubiquitin mediated proteolysis	ko04120	46 out of 3435 1.3391557496361%	1165 out of 58977 1.97534632144734%	0.998522	1	Cluster-44281.43827;Cluster-44281.70051;Cluster-44281.73381;Cluster-44281.83834;Cluster-44281.16258;Cluster-44281.105293;Cluster-44281.52527;Cluster-44281.56541;Cluster-44281.90809;Cluster-44281.38387;Cluster-44281.92541;Cluster-44281.70694;Cluster-50223.1;Cluster-6422.0;Cluster-44281.36496;Cluster-44281.42513;Cluster-44281.48732;Cluster-44281.54073;Cluster-44281.55475;Cluster-44281.64627;Cluster…	K03178+K03178+K03178+K03347+K03350+K03868+K03868+K03868+K03868+K04506+K04506+K06689+K06689+K06689+K10143+K10144+K10144+K10144+K10144+K10144+K10144+K10144+K10144+K10144+K10259+K10260+K10260+K10573+K10576+K10576+K10578+K10579+K10581+K10586+K10590+K10599+K10601+K10601+K10614+K10614+K10614+K10614+K10614+K10615+K10615+K10684		Peroxisome	ko04146	120 out of 8252 1.45419292292778%	1085 out of 58977 1.83970022212049%	0.998335	1	Cluster-44281.121113;Cluster-44281.80555;Cluster-44281.104559;Cluster-44281.93980;Cluster-44281.112041;Cluster-44281.131306;Cluster-44281.38775;Cluster-44281.57487;Cluster-44281.73438;Cluster-44281.79008;Cluster-44281.62860;Cluster-44281.73957;Cluster-44281.73958;Cluster-39255.0;Cluster-44281.47355;Cluster-74302.0;Cluster-44281.94332;Cluster-44281.149404;Cluster-44281.119483;Cluster-44281.74007;C…	K00031+K00031+K00106+K00106+K00232+K00232+K00232+K00232+K00232+K00232+K00306+K00477+K00477+K00624+K00624+K00624+K00830+K00869+K01578+K01578+K01640+K01897+K01897+K01897+K01897+K01897+K01897+K01897+K01897+K01897+K01897+K01897+K01897+K01897+K01897+K01897+K01897+K01897+K03781+K03781+K03781+K03781+K03781+K03781+K03781+K03781+K03781+K03781+K03781+K04564+K04564+K04564+K04564+K04564+K04565+K04565+K04565+…		Various types of N-glycan biosynthesis	ko00513	24 out of 6519 0.368154624942476%	390 out of 58977 0.661274734218424%	0.999687	1	Cluster-44281.26036;Cluster-44281.44291;Cluster-44281.64186;Cluster-44281.72271;Cluster-44281.66513;Cluster-44281.67667;Cluster-44281.39338;Cluster-44281.115899;Cluster-44281.17163;Cluster-44281.83048;Cluster-44281.110693;Cluster-44281.98129;Cluster-54130.0;Cluster-44281.74926;Cluster-44281.100062;Cluster-44281.15562;Cluster-44281.71032;Cluster-44281.8805;Cluster-44281.72335;Cluster-44281.133370;…	K01230+K01230+K01230+K01230+K03714+K03714+K03843+K03847+K03847+K03847+K05531+K05531+K05532+K07151+K12373+K12373+K12373+K12373+K12666+K12670+K12670+K14412+K14413+K14413
Biosynthesis of amino acids	ko01230	145 out of 3435 4.22125181950509%	3126 out of 58977 5.30037133119691%	0.998802	1	Cluster-44281.54121;Cluster-28414.0;Cluster-37464.0;Cluster-44281.91807;Cluster-44281.91873;Cluster-53655.1;Cluster-44281.121113;Cluster-44281.138911;Cluster-44281.66456;Cluster-44281.68097;Cluster-44281.80555;Cluster-50626.0;Cluster-55563.0;Cluster-44281.70201;Cluster-44281.37144;Cluster-44281.48799;Cluster-44281.51671;Cluster-44281.142153;Cluster-44281.5542;Cluster-44281.88037;Cluster-44281.956…	K00013+K00030+K00030+K00030+K00030+K00030+K00031+K00031+K00031+K00031+K00031+K00052+K00053+K00058+K00133+K00134+K00134+K00145+K00264+K00264+K00264+K00549+K00549+K00549+K00600+K00600+K00600+K00600+K00600+K00600+K00600+K00600+K00600+K00600+K00611+K00615+K00615+K00616+K00640+K00640+K00789+K00789+K00789+K00789+K00789+K00800+K00815+K00815+K00831+K00850+K00850+K00873+K00873+K00873+K00873+K00891+K00928+…		Homologous recombination	ko03440	43 out of 8252 0.521085797382453%	456 out of 58977 0.773182766163081%	0.998767	1	Cluster-44281.64692;Cluster-44281.64693;Cluster-44281.85264;Cluster-44281.98079;Cluster-44281.30161;Cluster-44281.30170;Cluster-44281.46172;Cluster-44281.46173;Cluster-44281.84758;Cluster-44281.106579;Cluster-44281.112594;Cluster-44281.15524;Cluster-44281.79782;Cluster-44281.41995;Cluster-44281.94693;Cluster-44281.132802;Cluster-44281.138293;Cluster-44281.98105;Cluster-44281.139079;Cluster-44281.…	K02327+K02327+K02327+K02327+K02328+K02328+K02328+K02328+K02328+K02335+K02335+K02335+K03111+K03505+K03505+K03655+K03655+K03655+K07466+K07466+K07466+K08775+K08991+K10683+K10683+K10683+K10728+K10728+K10728+K10728+K10728+K10740+K10869+K10870+K10875+K10875+K10875+K10877+K10880+K10882+K10901+K11864+K20776		Pantothenate and CoA biosynthesis	ko00770	23 out of 6519 0.352814848903206%	386 out of 58977 0.654492429252081%	0.999807	1	Cluster-44281.20042;Cluster-78207.0;Cluster-44281.132239;Cluster-44281.18385;Cluster-44281.104256;Cluster-44281.55484;Cluster-16986.0;Cluster-44281.104382;Cluster-44281.108476;Cluster-44281.42251;Cluster-44281.53607;Cluster-44281.55444;Cluster-44281.57714;Cluster-44281.7283;Cluster-44281.127843;Cluster-44281.115812;Cluster-44281.27834;Cluster-44281.5101;Cluster-44281.143853;Cluster-44281.143855;C…	K00826+K00826+K00859+K00859+K01464+K01464+K01513+K01513+K01513+K01513+K01513+K01513+K01513+K01598+K01652+K01653+K01918+K01922+K02201+K02201+K06133+K09680+K09680
Oxidative phosphorylation	ko00190	75 out of 3435 2.18340611353712%	1771 out of 58977 3.00286552384828%	0.998958	1	Cluster-14021.0;Cluster-63838.0;Cluster-44281.127042;Cluster-44281.148828;Cluster-13889.0;Cluster-44281.116286;Cluster-20645.0;Cluster-20836.0;Cluster-37190.0;Cluster-44281.126462;Cluster-44281.109357;Cluster-68220.2;Cluster-44281.58188;Cluster-44281.58423;Cluster-44281.76815;Cluster-44281.93239;Cluster-44281.10179;Cluster-44281.111739;Cluster-44281.111741;Cluster-44281.113867;Cluster-44281.12268…	K00234+K00234+K00411+K00411+K00413+K00413+K00415+K00415+K00415+K00416+K00417+K00417+K01507+K01507+K01507+K01507+K01535+K01535+K01535+K01535+K01535+K01535+K01535+K01535+K01535+K01535+K01535+K01535+K01535+K01535+K01535+K01535+K01535+K01535+K01535+K02109+K02115+K02115+K02128+K02128+K02128+K02128+K02130+K02132+K02132+K02132+K02132+K02133+K02133+K02133+K02137+K02138+K02139+K02140+K02144+K02155+K02256+…		Biosynthesis of amino acids	ko01230	378 out of 8252 4.58070770722249%	3126 out of 58977 5.30037133119691%	0.999377	1	Cluster-44281.77704;Cluster-28414.0;Cluster-44281.136005;Cluster-44281.14085;Cluster-44281.145023;Cluster-44281.91873;Cluster-44281.92797;Cluster-53655.1;Cluster-44281.121113;Cluster-44281.80555;Cluster-50626.0;Cluster-11781.0;Cluster-44281.124987;Cluster-47083.0;Cluster-48767.0;Cluster-55563.0;Cluster-19927.0;Cluster-44281.122491;Cluster-44281.62098;Cluster-44281.107993;Cluster-44281.123805;Clus…	K00013+K00030+K00030+K00030+K00030+K00030+K00030+K00030+K00031+K00031+K00052+K00053+K00053+K00053+K00053+K00053+K00058+K00058+K00058+K00133+K00133+K00133+K00133+K00133+K00133+K00133+K00133+K00134+K00134+K00134+K00134+K00134+K00134+K00134+K00134+K00134+K00134+K00134+K00134+K00134+K00134+K00134+K00134+K00134+K00145+K00145+K00147+K00147+K00264+K00264+K00264+K00264+K00264+K00286+K00290+K00549+K00549+…		Carbon metabolism	ko01200	360 out of 6519 5.52231937413714%	3857 out of 58977 6.53983756379606%	0.999856	1	Cluster-44281.102708;Cluster-44281.112754;Cluster-44281.144284;Cluster-44281.30194;Cluster-44281.46947;Cluster-44281.66123;Cluster-44281.71427;Cluster-44281.71428;Cluster-44281.106439;Cluster-44281.106440;Cluster-44281.115888;Cluster-44281.47533;Cluster-44281.50548;Cluster-44281.91907;Cluster-44281.92087;Cluster-54345.1;Cluster-54345.3;Cluster-44281.51427;Cluster-44281.144029;Cluster-44281.2327;C…	K00025+K00025+K00025+K00025+K00025+K00025+K00025+K00025+K00026+K00026+K00026+K00026+K00026+K00026+K00026+K00026+K00026+K00028+K00029+K00029+K00029+K00029+K00029+K00029+K00029+K00029+K00029+K00029+K00029+K00029+K00029+K00029+K00029+K00029+K00029+K00029+K00029+K00029+K00029+K00030+K00030+K00030+K00030+K00030+K00031+K00031+K00033+K00033+K00033+K00033+K00033+K00033+K00036+K00036+K00036+K00036+K00036+…
Tropane, piperidine and pyridine alkaloid biosynthesis	ko00960	4 out of 3435 0.116448326055313%	218 out of 58977 0.369635620665683%	0.998958	1	Cluster-44281.130448;Cluster-44281.107372;Cluster-44281.147019;Cluster-40813.0	K00276+K00815+K00815+K08081		2-Oxocarboxylic acid metabolism	ko01210	103 out of 8252 1.24818225884634%	976 out of 58977 1.65488241178765%	0.999481	1	Cluster-28414.0;Cluster-44281.136005;Cluster-44281.14085;Cluster-44281.145023;Cluster-44281.91873;Cluster-44281.92797;Cluster-53655.1;Cluster-44281.121113;Cluster-44281.80555;Cluster-50626.0;Cluster-11781.0;Cluster-44281.124987;Cluster-47083.0;Cluster-48767.0;Cluster-55563.0;Cluster-44281.107993;Cluster-44281.123805;Cluster-44281.14552;Cluster-44281.18905;Cluster-44281.37144;Cluster-44281.79890;C…	K00030+K00030+K00030+K00030+K00030+K00030+K00030+K00031+K00031+K00052+K00053+K00053+K00053+K00053+K00053+K00133+K00133+K00133+K00133+K00133+K00133+K00133+K00133+K00145+K00145+K00814+K00814+K00814+K00818+K00818+K00825+K00826+K00826+K00826+K00928+K00928+K00928+K00930+K01438+K01647+K01647+K01647+K01647+K01647+K01647+K01647+K01647+K01647+K01647+K01647+K01647+K01647+K01652+K01652+K01652+K01652+K01652+…		Ubiquitin mediated proteolysis	ko04120	90 out of 6519 1.38057984353428%	1165 out of 58977 1.97534632144734%	0.999948	1	Cluster-44281.113875;Cluster-44281.122546;Cluster-44281.43827;Cluster-44281.107344;Cluster-44281.67855;Cluster-44281.94063;Cluster-44281.85242;Cluster-44281.16258;Cluster-44281.117856;Cluster-44281.100691;Cluster-44281.112858;Cluster-44281.52814;Cluster-44281.145644;Cluster-44281.3534;Cluster-44281.105292;Cluster-44281.133075;Cluster-44281.133077;Cluster-44281.136566;Cluster-44281.19610;Cluster-4…	K03178+K03178+K03178+K03347+K03347+K03347+K03348+K03350+K03351+K03354+K03354+K03354+K03361+K03363+K03868+K03868+K03868+K03868+K03868+K03868+K03868+K03869+K03872+K04506+K04506+K04506+K04506+K04506+K04649+K06689+K06689+K06689+K06689+K06689+K06689+K06689+K10143+K10143+K10143+K10144+K10144+K10144+K10144+K10144+K10144+K10144+K10144+K10144+K10144+K10144+K10144+K10259+K10259+K10260+K10260+K10260+K10570+…
Aminoacyl-tRNA biosynthesis	ko00970	26 out of 3435 0.756914119359534%	758 out of 58977 1.28524679112196%	0.999099	1	Cluster-44281.78755;Cluster-44281.79384;Cluster-34919.0;Cluster-44281.85954;Cluster-44281.75239;Cluster-44281.14976;Cluster-44281.73391;Cluster-44281.89091;Cluster-44281.90514;Cluster-44281.69959;Cluster-44281.48804;Cluster-44281.90810;Cluster-44281.121928;Cluster-44281.22351;Cluster-44281.22352;Cluster-44281.72324;Cluster-44281.21034;Cluster-44281.43627;Cluster-44281.65370;Cluster-44281.76615;Cl…	K01867+K01867+K01868+K01868+K01869+K01870+K01870+K01870+K01870+K01872+K01873+K01873+K01874+K01875+K01875+K01880+K01881+K01881+K01881+K01887+K01892+K01893+K02433+K02433+K02435+K04567		Basal transcription factors	ko03022	29 out of 8252 0.351429956374212%	351 out of 58977 0.595147260796582%	0.999652	1	Cluster-44281.134858;Cluster-56333.0;Cluster-44281.144489;Cluster-44281.74854;Cluster-44281.75442;Cluster-44281.75453;Cluster-44281.90920;Cluster-44281.64966;Cluster-44281.65547;Cluster-44281.63859;Cluster-44281.55436;Cluster-58241.0;Cluster-44281.105880;Cluster-44281.112328;Cluster-44281.62031;Cluster-44281.65813;Cluster-46924.0;Cluster-44281.107249;Cluster-44281.109205;Cluster-44281.115511;Clus…	K03120+K03120+K03122+K03124+K03124+K03124+K03124+K03126+K03128+K03129+K03130+K03130+K03131+K03132+K03134+K03134+K03136+K03137+K03137+K03138+K03138+K03139+K03143+K03143+K10843+K10844+K10844+K14651+K14651		Biosynthesis of amino acids	ko01230	280 out of 6519 4.29513729099555%	3126 out of 58977 5.30037133119691%	0.999965	1	Cluster-37464.0;Cluster-44281.145023;Cluster-44281.42060;Cluster-44281.91807;Cluster-44281.92797;Cluster-44281.138911;Cluster-44281.68097;Cluster-44281.9270;Cluster-19927.0;Cluster-44281.122491;Cluster-44281.62098;Cluster-44281.70201;Cluster-44281.107993;Cluster-44281.123805;Cluster-44281.14552;Cluster-44281.18905;Cluster-44281.26635;Cluster-44281.49452;Cluster-44281.79890;Cluster-44281.87381;Clu…	K00030+K00030+K00030+K00030+K00030+K00031+K00031+K00052+K00058+K00058+K00058+K00058+K00133+K00133+K00133+K00133+K00133+K00133+K00133+K00133+K00134+K00134+K00134+K00134+K00134+K00134+K00134+K00134+K00134+K00134+K00134+K00134+K00134+K00145+K00145+K00145+K00145+K00145+K00264+K00286+K00548+K00549+K00549+K00549+K00549+K00549+K00549+K00549+K00549+K00549+K00549+K00549+K00549+K00600+K00600+K00600+K00600+…
Nucleotide excision repair	ko03420	16 out of 3435 0.465793304221252%	544 out of 58977 0.922393475422622%	0.999433	1	Cluster-44281.15524;Cluster-44281.38750;Cluster-44281.73615;Cluster-44281.105293;Cluster-44281.52527;Cluster-44281.56541;Cluster-44281.90809;Cluster-44281.119742;Cluster-44281.65152;Cluster-44281.34398;Cluster-44281.85148;Cluster-44281.101497;Cluster-44281.64020;Cluster-44281.97635;Cluster-44281.126681;Cluster-44281.105168	K02335+K03142+K03142+K03868+K03868+K03868+K03868+K07466+K07466+K10747+K10754+K10839+K10839+K10843+K10848+K10849		Cysteine and methionine metabolism	ko00270	158 out of 8252 1.91468734852157%	1438 out of 58977 2.43823863540024%	0.999734	1	Cluster-33640.0;Cluster-44281.8616;Cluster-44281.100235;Cluster-44281.112754;Cluster-44281.130408;Cluster-44281.142186;Cluster-44281.144284;Cluster-44281.30194;Cluster-44281.46947;Cluster-44281.48123;Cluster-44281.66123;Cluster-44281.71427;Cluster-44281.71428;Cluster-14746.0;Cluster-44281.10119;Cluster-44281.106440;Cluster-44281.112351;Cluster-44281.115888;Cluster-44281.47533;Cluster-44281.50548;…	K00016+K00016+K00025+K00025+K00025+K00025+K00025+K00025+K00025+K00025+K00025+K00025+K00025+K00026+K00026+K00026+K00026+K00026+K00026+K00026+K00026+K00026+K00026+K00026+K00058+K00058+K00058+K00133+K00133+K00133+K00133+K00133+K00133+K00133+K00133+K00547+K00547+K00547+K00547+K00547+K00549+K00549+K00549+K00549+K00549+K00549+K00549+K00549+K00549+K00549+K00549+K00549+K00549+K00549+K00549+K00549+K00549+…		Flavone and flavonol biosynthesis	ko00944	14 out of 6519 0.214756864549778%	301 out of 58977 0.510368448717297%	0.999975	1	Cluster-39018.0;Cluster-44281.108465;Cluster-44281.15401;Cluster-44281.137998;Cluster-44281.5684;Cluster-44281.85320;Cluster-44281.125778;Cluster-44281.23207;Cluster-44281.42630;Cluster-44281.65171;Cluster-44281.7692;Cluster-51754.0;Cluster-54546.0;Cluster-44281.43028	K05280+K05280+K05280+K13083+K13083+K13083+K22772+K22772+K22772+K22772+K22772+K22772+K22772+K22794
DNA replication	ko03030	11 out of 3435 0.320232896652111%	431 out of 58977 0.730793360123438%	0.999602	1	Cluster-17153.0;Cluster-44281.109850;Cluster-44281.15524;Cluster-44281.80086;Cluster-44281.22685;Cluster-44281.119742;Cluster-44281.65152;Cluster-44281.111377;Cluster-44281.15103;Cluster-44281.34398;Cluster-44281.85148	K02209+K02320+K02335+K02685+K03111+K07466+K07466+K10743+K10744+K10747+K10754		Pyrimidine metabolism	ko00240	100 out of 8252 1.21182743577315%	973 out of 58977 1.64979568306289%	0.999805	1	Cluster-44281.68140;Cluster-29621.0;Cluster-34212.1;Cluster-44281.100215;Cluster-44281.10337;Cluster-44281.119312;Cluster-44281.132164;Cluster-44281.13623;Cluster-44281.147197;Cluster-44281.15431;Cluster-44281.22607;Cluster-44281.7907;Cluster-44281.103250;Cluster-44281.117764;Cluster-44281.136461;Cluster-44281.24233;Cluster-44281.26184;Cluster-44281.34160;Cluster-44281.40103;Cluster-44281.45456;C…	K00207+K00857+K00857+K00857+K00857+K00857+K00857+K00857+K00857+K00857+K00857+K00857+K00876+K00876+K00876+K00876+K00876+K00876+K00876+K00876+K00876+K00876+K00876+K00940+K00940+K00940+K00940+K00940+K00940+K00943+K01081+K01081+K01081+K01081+K01240+K01240+K01240+K01240+K01431+K01464+K01464+K01465+K01510+K01510+K01510+K01510+K01510+K01513+K01513+K01513+K01513+K01513+K01513+K01513+K01513+K01520+K01937+…		Protein processing in endoplasmic reticulum	ko04141	233 out of 6519 3.57416781714987%	2679 out of 58977 4.5424487512081%	0.999982	1	Cluster-44281.39183;Cluster-44281.39184;Cluster-44281.57707;Cluster-44281.26036;Cluster-44281.44291;Cluster-44281.64186;Cluster-44281.72271;Cluster-44281.43468;Cluster-44281.45664;Cluster-44281.55220;Cluster-44281.97597;Cluster-56729.0;Cluster-32320.0;Cluster-11528.0;Cluster-44281.101855;Cluster-44281.10876;Cluster-44281.116639;Cluster-44281.126136;Cluster-44281.127776;Cluster-44281.138919;Cluste…	K01228+K01228+K01228+K01230+K01230+K01230+K01230+K01456+K01456+K01456+K01456+K01456+K03237+K03283+K03283+K03283+K03283+K03283+K03283+K03283+K03283+K03283+K03283+K03283+K03283+K03283+K03283+K03283+K03283+K03283+K03283+K03283+K03283+K03283+K03283+K03283+K03283+K03283+K03283+K03283+K03283+K03283+K03283+K03283+K03283+K03283+K03283+K03283+K03283+K03283+K03283+K03283+K03347+K03347+K03347+K03868+K03868+…
Various types of N-glycan biosynthesis	ko00513	9 out of 3435 0.262008733624454%	390 out of 58977 0.661274734218424%	0.999743	1	Cluster-44281.97724;Cluster-44281.118112;Cluster-44281.131670;Cluster-44281.40783;Cluster-44281.8805;Cluster-44281.72335;Cluster-44281.87283;Cluster-44281.71548;Cluster-44281.78648	K03847+K05528+K05531+K12373+K12373+K12666+K12669+K12670+K14412		Protein export	ko03060	28 out of 8252 0.339311682016481%	355 out of 58977 0.601929565762925%	0.999868	1	Cluster-44281.110406;Cluster-44281.73658;Cluster-44281.92903;Cluster-44281.77022;Cluster-44281.95640;Cluster-44281.34313;Cluster-44281.19357;Cluster-44281.43008;Cluster-44281.111546;Cluster-44281.75756;Cluster-70870.0;Cluster-61207.0;Cluster-44281.110272;Cluster-44281.113361;Cluster-44281.113362;Cluster-44281.137253;Cluster-44281.139873;Cluster-44281.48895;Cluster-44281.84276;Cluster-44281.78845;…	K03070+K03070+K03070+K03100+K03100+K03106+K03110+K03110+K03217+K03217+K07342+K09481+K09490+K09490+K09490+K09490+K09490+K09490+K09490+K09540+K09648+K10956+K10956+K10956+K10956+K10956+K10956+K12946		Endocytosis	ko04144	159 out of 6519 2.4390243902439%	1947 out of 58977 3.30128694236736%	0.999993	1	Cluster-44281.2365;Cluster-44281.24387;Cluster-44281.78470;Cluster-44281.78931;Cluster-44281.95205;Cluster-46422.0;Cluster-80520.0;Cluster-44281.3237;Cluster-44281.68183;Cluster-44281.77076;Cluster-44281.77077;Cluster-44281.79393;Cluster-70968.0;Cluster-44281.110754;Cluster-44281.112619;Cluster-11528.0;Cluster-44281.101855;Cluster-44281.10876;Cluster-44281.116639;Cluster-44281.126136;Cluster-4428…	K00889+K00889+K00889+K00889+K00889+K00889+K00889+K01115+K01115+K01115+K01115+K01115+K01115+K01528+K01528+K03283+K03283+K03283+K03283+K03283+K03283+K03283+K03283+K03283+K03283+K03283+K03283+K03283+K03283+K03283+K03283+K03283+K03283+K03283+K03283+K03283+K03283+K03283+K03283+K03283+K03283+K03283+K03283+K03283+K03283+K03283+K03283+K03283+K03283+K03283+K03283+K03283+K03283+K03283+K04513+K04513+K04645+…
Citrate cycle (TCA cycle)	ko00020	56 out of 3435 1.63027656477438%	1467 out of 58977 2.48741034640623%	0.999826	1	Cluster-44281.102708;Cluster-44281.142163;Cluster-14746.0;Cluster-44281.106439;Cluster-44281.120101;Cluster-44281.122511;Cluster-44281.60671;Cluster-44281.92087;Cluster-28414.0;Cluster-37464.0;Cluster-44281.91807;Cluster-44281.91873;Cluster-53655.1;Cluster-44281.121113;Cluster-44281.138911;Cluster-44281.66456;Cluster-44281.68097;Cluster-44281.80555;Cluster-44281.22426;Cluster-44281.64227;Cluster-…	K00025+K00025+K00026+K00026+K00026+K00026+K00026+K00026+K00030+K00030+K00030+K00030+K00030+K00031+K00031+K00031+K00031+K00031+K00162+K00164+K00234+K00234+K00382+K00382+K00382+K00382+K00658+K01610+K01610+K01610+K01610+K01610+K01610+K01610+K01610+K01610+K01610+K01610+K01647+K01647+K01647+K01647+K01648+K01679+K01681+K01681+K01681+K01681+K01681+K01681+K01681+K01681+K01681+K01681+K01899+K01900		DNA replication	ko03030	36 out of 8252 0.436257876878333%	431 out of 58977 0.730793360123438%	0.999885	1	Cluster-44281.118298;Cluster-44281.40575;Cluster-44281.64692;Cluster-44281.64693;Cluster-44281.85264;Cluster-44281.98079;Cluster-44281.30161;Cluster-44281.30170;Cluster-44281.46172;Cluster-44281.46173;Cluster-44281.84758;Cluster-44281.106579;Cluster-44281.112594;Cluster-44281.15524;Cluster-44281.81468;Cluster-44281.109547;Cluster-44281.25681;Cluster-44281.38758;Cluster-44281.41252;Cluster-44281.5…	K02209+K02210+K02327+K02327+K02327+K02327+K02328+K02328+K02328+K02328+K02328+K02335+K02335+K02335+K02540+K02542+K02542+K02542+K02542+K02685+K02685+K03111+K03505+K03505+K04799+K07466+K07466+K07466+K10740+K10744+K10744+K10747+K10754+K10755+K10755+K10756		N-Glycan biosynthesis	ko00510	22 out of 6519 0.337475072863936%	436 out of 58977 0.739271241331366%	0.999997	1	Cluster-30640.0;Cluster-44281.76654;Cluster-44281.39183;Cluster-44281.39184;Cluster-44281.57707;Cluster-44281.26036;Cluster-44281.44291;Cluster-44281.64186;Cluster-44281.72271;Cluster-44281.39338;Cluster-44281.115899;Cluster-44281.17163;Cluster-44281.83048;Cluster-44281.17222;Cluster-44281.99927;Cluster-44281.74926;Cluster-44281.121946;Cluster-44281.42729;Cluster-78376.0;Cluster-44281.72335;Clust…	K00721+K00729+K01228+K01228+K01228+K01230+K01230+K01230+K01230+K03843+K03847+K03847+K03847+K03850+K05546+K07151+K07252+K07252+K07252+K12666+K12670+K12670
Carbon metabolism	ko01200	174 out of 3435 5.06550218340611%	3857 out of 58977 6.53983756379606%	0.999916	1	Cluster-44281.102708;Cluster-44281.142163;Cluster-14746.0;Cluster-44281.106439;Cluster-44281.120101;Cluster-44281.122511;Cluster-44281.60671;Cluster-44281.92087;Cluster-44281.144029;Cluster-44281.53418;Cluster-44281.56408;Cluster-44281.71054;Cluster-44281.83541;Cluster-44281.92281;Cluster-28414.0;Cluster-37464.0;Cluster-44281.91807;Cluster-44281.91873;Cluster-53655.1;Cluster-44281.121113;Cluster-…	K00025+K00025+K00026+K00026+K00026+K00026+K00026+K00026+K00029+K00029+K00029+K00029+K00029+K00029+K00030+K00030+K00030+K00030+K00030+K00031+K00031+K00031+K00031+K00031+K00033+K00033+K00033+K00036+K00036+K00051+K00058+K00121+K00121+K00121+K00121+K00122+K00131+K00134+K00134+K00162+K00164+K00232+K00234+K00234+K00281+K00281+K00281+K00297+K00382+K00382+K00382+K00382+K00600+K00600+K00600+K00600+K00600+…		Various types of N-glycan biosynthesis	ko00513	31 out of 8252 0.375666505089675%	390 out of 58977 0.661274734218424%	0.999921	1	Cluster-44281.105515;Cluster-44281.124974;Cluster-44281.26036;Cluster-44281.44513;Cluster-44281.64186;Cluster-44281.66513;Cluster-44281.67667;Cluster-44281.89041;Cluster-44281.99709;Cluster-44281.39338;Cluster-44281.118112;Cluster-16326.0;Cluster-44281.131670;Cluster-54130.0;Cluster-30362.0;Cluster-44281.74926;Cluster-55783.0;Cluster-19680.0;Cluster-44281.100061;Cluster-44281.114013;Cluster-44281…	K01230+K01230+K01230+K01230+K01230+K03714+K03714+K03714+K03842+K03843+K05528+K05529+K05531+K05532+K05533+K07151+K07151+K12373+K12373+K12373+K12373+K12373+K12373+K12667+K12669+K12669+K12670+K12670+K14413+K14413+K14413		Pyrimidine metabolism	ko00240	66 out of 6519 1.01242521859181%	973 out of 58977 1.64979568306289%	0.999998	1	Cluster-12215.0;Cluster-28223.0;Cluster-29621.0;Cluster-34212.1;Cluster-44281.103250;Cluster-44281.136461;Cluster-44281.26184;Cluster-44281.45455;Cluster-44281.45456;Cluster-44281.52318;Cluster-25816.0;Cluster-44281.53119;Cluster-44281.65516;Cluster-44281.76424;Cluster-44281.95122;Cluster-44281.99541;Cluster-44281.123113;Cluster-44281.29697;Cluster-44281.35383;Cluster-44281.59760;Cluster-44281.80…	K00609+K00609+K00857+K00857+K00876+K00876+K00876+K00876+K00876+K00876+K00940+K00940+K00940+K00940+K00940+K00940+K01081+K01081+K01081+K01240+K01240+K01464+K01464+K01465+K01489+K01510+K01510+K01510+K01513+K01513+K01513+K01513+K01513+K01513+K01513+K01520+K01937+K01937+K01937+K01937+K01937+K01937+K01937+K01937+K01937+K01955+K01955+K01955+K03783+K03787+K03787+K06966+K06966+K06966+K06966+K06966+K09903+…
ABC transporters	ko02010	36 out of 3435 1.04803493449782%	1102 out of 58977 1.86852501822744%	0.999971	1	Cluster-44281.59056;Cluster-44281.111395;Cluster-44281.112751;Cluster-44281.26956;Cluster-44281.4328;Cluster-44281.60276;Cluster-44281.69990;Cluster-44281.88244;Cluster-52394.0;Cluster-67402.3;Cluster-44281.114031;Cluster-44281.126938;Cluster-44281.31152;Cluster-44281.43643;Cluster-44281.63464;Cluster-44281.118619;Cluster-44281.124055;Cluster-44281.126936;Cluster-44281.128608;Cluster-44281.149141…	K05643+K05658+K05658+K05658+K05658+K05658+K05658+K05658+K05658+K05658+K05665+K05665+K05665+K05665+K05665+K05666+K05666+K05666+K05666+K05666+K05666+K05666+K05666+K05666+K05666+K05666+K05666+K05681+K05681+K05681+K05681+K05681+K05681+K05681+K05681+K05681		Carbon metabolism	ko01200	461 out of 8252 5.5865244789142%	3857 out of 58977 6.53983756379606%	0.999946	1	Cluster-44281.100235;Cluster-44281.112754;Cluster-44281.130408;Cluster-44281.142186;Cluster-44281.144284;Cluster-44281.30194;Cluster-44281.46947;Cluster-44281.48123;Cluster-44281.66123;Cluster-44281.71427;Cluster-44281.71428;Cluster-14746.0;Cluster-44281.10119;Cluster-44281.106440;Cluster-44281.112351;Cluster-44281.115888;Cluster-44281.47533;Cluster-44281.50548;Cluster-44281.91907;Cluster-44281.9…	K00025+K00025+K00025+K00025+K00025+K00025+K00025+K00025+K00025+K00025+K00025+K00026+K00026+K00026+K00026+K00026+K00026+K00026+K00026+K00026+K00026+K00026+K00028+K00029+K00029+K00029+K00029+K00029+K00029+K00029+K00029+K00029+K00029+K00029+K00029+K00029+K00029+K00029+K00029+K00029+K00029+K00029+K00029+K00030+K00030+K00030+K00030+K00030+K00030+K00030+K00031+K00031+K00033+K00033+K00033+K00033+K00033+…		Phagosome	ko04145	57 out of 6519 0.87436723423838%	870 out of 58977 1.47515133017956%	0.999998	1	Cluster-44281.102276;Cluster-44281.103159;Cluster-44281.103982;Cluster-44281.74100;Cluster-44281.108828;Cluster-44281.83034;Cluster-44281.83907;Cluster-44281.91753;Cluster-44281.97739;Cluster-44281.103828;Cluster-44281.69910;Cluster-44281.76257;Cluster-44281.76625;Cluster-44281.76629;Cluster-44281.76957;Cluster-44281.82477;Cluster-44281.113803;Cluster-44281.129058;Cluster-44281.35201;Cluster-4428…	K00914+K00914+K00914+K00914+K00921+K00921+K00921+K00921+K00921+K01365+K02144+K02145+K02145+K02145+K02145+K02145+K02149+K02154+K02154+K02154+K02155+K04392+K05692+K05692+K07342+K07374+K07374+K07374+K07374+K07374+K07374+K07374+K07374+K07374+K07375+K07375+K07375+K07375+K07375+K07375+K07375+K07375+K07375+K07375+K07375+K07375+K07375+K07897+K08057+K08057+K08057+K08057+K08492+K09481+K09481+K10956+K10956
Purine metabolism	ko00230	37 out of 3435 1.07714701601164%	1148 out of 58977 1.94652152534039%	0.999986	1	Cluster-44281.90901;Cluster-44281.140025;Cluster-44281.56961;Cluster-44281.62856;Cluster-44281.75505;Cluster-44281.43311;Cluster-44281.83655;Cluster-25816.0;Cluster-44281.125685;Cluster-44281.93210;Cluster-44281.11126;Cluster-75862.0;Cluster-44281.108707;Cluster-44281.87838;Cluster-44281.114301;Cluster-44281.133255;Cluster-44281.97936;Cluster-44281.56611;Cluster-44281.72223;Cluster-44281.82378;Cl…	K00764+K00873+K00873+K00873+K00873+K00939+K00939+K00940+K00940+K00940+K00942+K00948+K00951+K00951+K00988+K00988+K01487+K01490+K01490+K01510+K01513+K01513+K01513+K01835+K01933+K01951+K01951+K01951+K01951+K03787+K03787+K14977+K14977+K14977+K18453+K18453+K18453		Flavone and flavonol biosynthesis	ko00944	19 out of 8252 0.230247212796898%	301 out of 58977 0.510368448717297%	0.999993	1	Cluster-39018.0;Cluster-44281.119415;Cluster-44281.75090;Cluster-44281.137998;Cluster-44281.29648;Cluster-44281.85320;Cluster-44281.86288;Cluster-19647.0;Cluster-44281.125778;Cluster-44281.127993;Cluster-44281.23207;Cluster-44281.42630;Cluster-44281.49129;Cluster-44281.65171;Cluster-44281.7692;Cluster-51754.0;Cluster-64201.0;Cluster-44281.122994;Cluster-44281.148148	K05280+K05280+K05280+K13083+K13083+K13083+K13083+K22772+K22772+K22772+K22772+K22772+K22772+K22772+K22772+K22772+K22772+K22794+K22794		2-Oxocarboxylic acid metabolism	ko01210	64 out of 6519 0.981745666513269%	976 out of 58977 1.65488241178765%	0.999999	1	Cluster-37464.0;Cluster-44281.145023;Cluster-44281.42060;Cluster-44281.91807;Cluster-44281.92797;Cluster-44281.138911;Cluster-44281.68097;Cluster-44281.9270;Cluster-44281.107993;Cluster-44281.123805;Cluster-44281.14552;Cluster-44281.18905;Cluster-44281.26635;Cluster-44281.49452;Cluster-44281.79890;Cluster-44281.87381;Cluster-44281.142153;Cluster-44281.73860;Cluster-44281.79834;Cluster-44281.80299…	K00030+K00030+K00030+K00030+K00030+K00031+K00031+K00052+K00133+K00133+K00133+K00133+K00133+K00133+K00133+K00133+K00145+K00145+K00145+K00145+K00145+K00818+K00826+K00826+K00928+K00928+K00928+K00928+K00928+K00928+K01647+K01647+K01647+K01647+K01647+K01647+K01647+K01647+K01647+K01652+K01653+K01681+K01681+K01681+K01681+K01681+K01681+K01681+K01681+K01681+K01681+K01681+K01681+K01681+K01704+K01705+K11820+…
N-Glycan biosynthesis	ko00510	8 out of 3435 0.232896652110626%	436 out of 58977 0.739271241331366%	0.999989	1	Cluster-44281.134882;Cluster-44281.39183;Cluster-44281.57707;Cluster-44281.97724;Cluster-44281.42729;Cluster-44281.72335;Cluster-44281.87283;Cluster-44281.71548	K01228+K01228+K01228+K03847+K07252+K12666+K12669+K12670		N-Glycan biosynthesis	ko00510	31 out of 8252 0.375666505089675%	436 out of 58977 0.739271241331366%	0.999998	1	Cluster-30640.0;Cluster-44281.46994;Cluster-44281.76654;Cluster-44281.143298;Cluster-44281.96843;Cluster-44281.108291;Cluster-44281.57707;Cluster-44281.105515;Cluster-44281.124974;Cluster-44281.26036;Cluster-44281.44513;Cluster-44281.64186;Cluster-44281.99709;Cluster-44281.39338;Cluster-44281.17222;Cluster-44281.96408;Cluster-44281.99927;Cluster-44281.74926;Cluster-55783.0;Cluster-44281.121946;Cl…	K00721+K00721+K00729+K00737+K00737+K01228+K01228+K01230+K01230+K01230+K01230+K01230+K03842+K03843+K03850+K05546+K05546+K07151+K07151+K07252+K07252+K07252+K07252+K09659+K09659+K12345+K12667+K12669+K12669+K12670+K12670		Valine, leucine and isoleucine biosynthesis	ko00290	7 out of 6519 0.107378432274889%	247 out of 58977 0.418807331671669%	1	1	Cluster-44281.9270;Cluster-44281.20042;Cluster-78207.0;Cluster-44281.127843;Cluster-44281.115812;Cluster-44281.123686;Cluster-44281.67342	K00052+K00826+K00826+K01652+K01653+K01704+K01754
Pyrimidine metabolism	ko00240	29 out of 3435 0.844250363901019%	973 out of 58977 1.64979568306289%	0.999989	1	Cluster-44281.68140;Cluster-12215.0;Cluster-44281.100215;Cluster-44281.132164;Cluster-44281.15431;Cluster-44281.7907;Cluster-44281.34160;Cluster-44281.45456;Cluster-25816.0;Cluster-44281.125685;Cluster-44281.93210;Cluster-44281.71582;Cluster-44281.76992;Cluster-44281.104256;Cluster-44281.136370;Cluster-44281.82378;Cluster-16986.0;Cluster-44281.53607;Cluster-44281.65487;Cluster-44281.56221;Cluster…	K00207+K00609+K00857+K00857+K00857+K00857+K00876+K00876+K00940+K00940+K00940+K01240+K01431+K01464+K01465+K01510+K01513+K01513+K01513+K01955+K01955+K01955+K01955+K03787+K03787+K11541+K13800+K16329+K16329		Propanoate metabolism	ko00640	51 out of 8252 0.618031992244304%	628 out of 58977 1.06482187971582%	0.999998	1	Cluster-33640.0;Cluster-44281.8616;Cluster-44281.144115;Cluster-44281.22593;Cluster-77207.0;Cluster-44281.112041;Cluster-44281.131306;Cluster-44281.38775;Cluster-44281.57487;Cluster-44281.73438;Cluster-44281.79008;Cluster-44281.110327;Cluster-44281.59821;Cluster-44281.73969;Cluster-44281.78168;Cluster-44281.104561;Cluster-44281.146243;Cluster-44281.95615;Cluster-44281.99919;Cluster-44281.109847;C…	K00016+K00016+K00140+K00140+K00140+K00232+K00232+K00232+K00232+K00232+K00232+K00382+K00382+K00382+K00382+K00626+K00626+K00626+K00626+K00656+K00823+K01578+K01578+K01682+K01720+K01720+K01847+K01895+K01895+K01895+K01895+K01899+K01899+K01900+K01900+K01900+K01961+K01961+K05605+K05605+K05605+K09699+K09699+K09699+K09699+K09699+K09699+K09699+K09699+K11262+K11262		Ribosome biogenesis in eukaryotes	ko03008	85 out of 6519 1.30388096333794%	1260 out of 58977 2.13642606439799%	1	1	Cluster-21422.0;Cluster-44281.55953;Cluster-44281.58364;Cluster-44281.64398;Cluster-44281.66441;Cluster-44281.66479;Cluster-44281.80268;Cluster-59649.0;Cluster-44281.73300;Cluster-44281.109656;Cluster-44281.52291;Cluster-44281.89133;Cluster-45665.0;Cluster-44281.73495;Cluster-44281.52455;Cluster-44281.6308;Cluster-35560.0;Cluster-44281.52875;Cluster-44281.92847;Cluster-80826.9;Cluster-44281.11571…	K03097+K03097+K03097+K03097+K03097+K03097+K03097+K03097+K03115+K06943+K07936+K07936+K11108+K11128+K11129+K11130+K11131+K11131+K11131+K11131+K11883+K11883+K12619+K12619+K12619+K12619+K12619+K12845+K14290+K14521+K14521+K14521+K14525+K14525+K14525+K14525+K14525+K14525+K14536+K14536+K14538+K14538+K14538+K14544+K14544+K14544+K14544+K14548+K14548+K14548+K14548+K14548+K14548+K14548+K14548+K14548+K14548+…
RNA polymerase	ko03020	33 out of 3435 0.960698689956332%	1090 out of 58977 1.84817810332842%	0.999995	1	Cluster-44281.112506;Cluster-44281.112946;Cluster-44281.115971;Cluster-44281.118881;Cluster-44281.121680;Cluster-44281.122176;Cluster-44281.13666;Cluster-44281.18766;Cluster-44281.28347;Cluster-44281.31604;Cluster-44281.42880;Cluster-44281.4473;Cluster-44281.56321;Cluster-44281.59530;Cluster-44281.61262;Cluster-44281.62932;Cluster-44281.66903;Cluster-44281.69297;Cluster-44281.69526;Cluster-44281.…	K03004+K03006+K03006+K03006+K03006+K03006+K03006+K03006+K03006+K03006+K03006+K03006+K03006+K03006+K03006+K03006+K03006+K03006+K03006+K03006+K03006+K03006+K03011+K03021+K03022+K03022+K03027+K03046+K03046+K03046+K03046+K03046+K03046		Phagosome	ko04145	75 out of 8252 0.908870576829859%	870 out of 58977 1.47515133017956%	1	1	Cluster-44281.103982;Cluster-44281.74100;Cluster-44281.74101;Cluster-12002.0;Cluster-44281.108828;Cluster-44281.73486;Cluster-44281.91753;Cluster-44281.103828;Cluster-44281.76871;Cluster-40001.0;Cluster-44281.76257;Cluster-44281.76625;Cluster-44281.76629;Cluster-44281.76957;Cluster-44281.82477;Cluster-44281.129058;Cluster-44281.35201;Cluster-44281.66002;Cluster-44281.138555;Cluster-44281.118060;C…	K00914+K00914+K00914+K00921+K00921+K00921+K00921+K01365+K01365+K02145+K02145+K02145+K02145+K02145+K02145+K02154+K02154+K02154+K02155+K04392+K04392+K04392+K04392+K04392+K04392+K05692+K05692+K05692+K05692+K05692+K05692+K07342+K07374+K07374+K07374+K07374+K07374+K07374+K07374+K07374+K07374+K07374+K07375+K07375+K07375+K07375+K07375+K07375+K07375+K07375+K07375+K07375+K07375+K07375+K07375+K07375+K07375+…		Propanoate metabolism	ko00640	32 out of 6519 0.490872833256634%	628 out of 58977 1.06482187971582%	1	1	Cluster-33640.0;Cluster-40207.0;Cluster-44281.64417;Cluster-77207.0;Cluster-44281.73438;Cluster-44281.79008;Cluster-44281.59821;Cluster-44281.72662;Cluster-44281.73969;Cluster-44281.79063;Cluster-44281.84582;Cluster-44281.83547;Cluster-44281.147354;Cluster-44281.107895;Cluster-44281.37958;Cluster-44281.2551;Cluster-44281.46186;Cluster-44281.90381;Cluster-44281.123349;Cluster-44281.147488;Cluster-…	K00016+K00016+K00016+K00140+K00232+K00232+K00382+K00382+K00382+K00382+K00382+K00626+K00925+K01720+K01847+K01895+K01895+K01895+K01899+K01899+K01899+K01899+K01899+K01900+K01961+K05605+K05605+K05605+K09699+K11262+K11262+K11262
mRNA surveillance pathway	ko03015	51 out of 3435 1.48471615720524%	1717 out of 58977 2.91130440680265%	1	1	Cluster-9128.3;Cluster-11568.0;Cluster-44281.95310;Cluster-44281.101079;Cluster-44281.62172;Cluster-44281.14253;Cluster-44281.146388;Cluster-44281.51402;Cluster-44281.96091;Cluster-44281.118547;Cluster-44281.71471;Cluster-44281.95288;Cluster-42100.0;Cluster-44281.43176;Cluster-44281.18489;Cluster-16232.0;Cluster-44281.137134;Cluster-44281.34649;Cluster-44281.75066;Cluster-44281.98406;Cluster-4428…	K03265+K03267+K04354+K04382+K04382+K06269+K06269+K06269+K06965+K11584+K11584+K11584+K12812+K12812+K12877+K12881+K12881+K12881+K12881+K12881+K12882+K13114+K13126+K13126+K13126+K13126+K13126+K13126+K13126+K13126+K13126+K13126+K13126+K14325+K14326+K14326+K14326+K14326+K14376+K14399+K14399+K14401+K14404+K14404+K14404+K14405+K14411+K14411+K14411+K15544+K15544		Ribosome biogenesis in eukaryotes	ko03008	117 out of 8252 1.41783809985458%	1260 out of 58977 2.13642606439799%	1	1	Cluster-21422.0;Cluster-44281.55953;Cluster-44281.58364;Cluster-44281.64398;Cluster-44281.66479;Cluster-44281.80268;Cluster-59649.0;Cluster-44281.76244;Cluster-34256.0;Cluster-44281.59928;Cluster-44281.117275;Cluster-44281.117276;Cluster-44281.57506;Cluster-13365.0;Cluster-51761.0;Cluster-44281.62101;Cluster-44281.8182;Cluster-44281.146051;Cluster-44281.146057;Cluster-44281.43208;Cluster-44281.52…	K03097+K03097+K03097+K03097+K03097+K03097+K03097+K03115+K03264+K03264+K03538+K03538+K03539+K06943+K06943+K07562+K07562+K07936+K07936+K07936+K07936+K07936+K11108+K11128+K11129+K11130+K11131+K11131+K11131+K11131+K11883+K11883+K11883+K11883+K12619+K12619+K12619+K12619+K12619+K12619+K12845+K12845+K14521+K14521+K14521+K14521+K14525+K14525+K14525+K14525+K14525+K14525+K14525+K14525+K14525+K14537+K14538+…		Citrate cycle (TCA cycle)	ko00020	90 out of 6519 1.38057984353428%	1467 out of 58977 2.48741034640623%	1	1	Cluster-44281.102708;Cluster-44281.112754;Cluster-44281.144284;Cluster-44281.30194;Cluster-44281.46947;Cluster-44281.66123;Cluster-44281.71427;Cluster-44281.71428;Cluster-44281.106439;Cluster-44281.106440;Cluster-44281.115888;Cluster-44281.47533;Cluster-44281.50548;Cluster-44281.91907;Cluster-44281.92087;Cluster-54345.1;Cluster-54345.3;Cluster-37464.0;Cluster-44281.145023;Cluster-44281.42060;Clus…	K00025+K00025+K00025+K00025+K00025+K00025+K00025+K00025+K00026+K00026+K00026+K00026+K00026+K00026+K00026+K00026+K00026+K00030+K00030+K00030+K00030+K00030+K00031+K00031+K00161+K00161+K00161+K00161+K00162+K00162+K00162+K00234+K00234+K00235+K00382+K00382+K00382+K00382+K00382+K00627+K00627+K00627+K00627+K00627+K01610+K01610+K01610+K01610+K01610+K01610+K01610+K01610+K01610+K01610+K01610+K01647+K01647+…
Ribosome biogenesis in eukaryotes	ko03008	30 out of 3435 0.873362445414847%	1260 out of 58977 2.13642606439799%	1	1	Cluster-59649.0;Cluster-34256.0;Cluster-13365.0;Cluster-44281.109656;Cluster-44281.146057;Cluster-44281.43208;Cluster-44281.58661;Cluster-44281.73495;Cluster-44281.52455;Cluster-44281.6308;Cluster-44281.115714;Cluster-44281.71490;Cluster-44281.81225;Cluster-55630.0;Cluster-44281.92684;Cluster-44281.2507;Cluster-44281.96089;Cluster-47155.0;Cluster-44281.4499;Cluster-44281.150060;Cluster-44281.2936…	K03097+K03264+K06943+K06943+K07936+K07936+K07936+K11128+K11129+K11130+K11883+K12619+K12619+K12619+K14521+K14537+K14538+K14538+K14548+K14550+K14552+K14554+K14554+K14560+K14560+K14563+K14564+K14565+K14570+K14570		Oxidative phosphorylation	ko00190	177 out of 8252 2.14493456131847%	1771 out of 58977 3.00286552384828%	1	1	Cluster-14021.0;Cluster-32903.0;Cluster-44281.27937;Cluster-44281.4984;Cluster-44281.51844;Cluster-44281.70458;Cluster-44281.98895;Cluster-63838.0;Cluster-29600.0;Cluster-44281.148449;Cluster-44281.141646;Cluster-44281.35121;Cluster-44281.127042;Cluster-13889.0;Cluster-44281.116286;Cluster-20645.0;Cluster-20836.0;Cluster-44281.103004;Cluster-44281.10686;Cluster-44281.126462;Cluster-44281.109357;C…	K00234+K00234+K00234+K00234+K00234+K00234+K00234+K00234+K00235+K00235+K00236+K00237+K00411+K00413+K00413+K00415+K00415+K00415+K00415+K00416+K00417+K00417+K00419+K00937+K01507+K01507+K01507+K01507+K01507+K01507+K01507+K01507+K01507+K01535+K01535+K01535+K01535+K01535+K01535+K01535+K01535+K01535+K01535+K01535+K01535+K01535+K01535+K01535+K01535+K01535+K01535+K01535+K01535+K01535+K01535+K01535+K01535+…		mRNA surveillance pathway	ko03015	111 out of 6519 1.70271514035895%	1717 out of 58977 2.91130440680265%	1	1	Cluster-44281.120184;Cluster-44281.53962;Cluster-44281.63084;Cluster-44281.74224;Cluster-44281.59448;Cluster-44281.95310;Cluster-41215.0;Cluster-44281.113174;Cluster-44281.28920;Cluster-44281.68399;Cluster-44281.69386;Cluster-44281.77533;Cluster-44281.84431;Cluster-44281.84432;Cluster-44281.36524;Cluster-44281.118680;Cluster-44281.146387;Cluster-44281.48547;Cluster-44281.51402;Cluster-44281.98025…	K00565+K03265+K03265+K03265+K03456+K04354+K04382+K04382+K04382+K04382+K04382+K04382+K04382+K04382+K06100+K06269+K06269+K06269+K06269+K08873+K11583+K11584+K11584+K11584+K11584+K11584+K11584+K11584+K11584+K11584+K12812+K12812+K12812+K12812+K12812+K12812+K12812+K12812+K12875+K12875+K12875+K12876+K12881+K12881+K12881+K12881+K12882+K13025+K13114+K13114+K13126+K13126+K13126+K13126+K13126+K13126+K13126+…
									Citrate cycle (TCA cycle)	ko00020	133 out of 8252 1.61173048957828%	1467 out of 58977 2.48741034640623%	1	1	Cluster-44281.100235;Cluster-44281.112754;Cluster-44281.130408;Cluster-44281.142186;Cluster-44281.144284;Cluster-44281.30194;Cluster-44281.46947;Cluster-44281.48123;Cluster-44281.66123;Cluster-44281.71427;Cluster-44281.71428;Cluster-14746.0;Cluster-44281.10119;Cluster-44281.106440;Cluster-44281.112351;Cluster-44281.115888;Cluster-44281.47533;Cluster-44281.50548;Cluster-44281.91907;Cluster-44281.9…	K00025+K00025+K00025+K00025+K00025+K00025+K00025+K00025+K00025+K00025+K00025+K00026+K00026+K00026+K00026+K00026+K00026+K00026+K00026+K00026+K00026+K00026+K00030+K00030+K00030+K00030+K00030+K00030+K00030+K00031+K00031+K00161+K00161+K00161+K00161+K00161+K00161+K00161+K00162+K00162+K00162+K00164+K00164+K00234+K00234+K00234+K00234+K00234+K00234+K00234+K00234+K00235+K00235+K00236+K00237+K00382+K00382+…		Oxidative phosphorylation	ko00190	114 out of 6519 1.74873446847676%	1771 out of 58977 3.00286552384828%	1	1	Cluster-44281.51844;Cluster-44281.70458;Cluster-44281.148449;Cluster-44281.127042;Cluster-44281.116286;Cluster-44281.103004;Cluster-44281.10686;Cluster-44281.126462;Cluster-44281.81578;Cluster-44281.58423;Cluster-44281.58424;Cluster-44281.71793;Cluster-44281.71794;Cluster-44281.76815;Cluster-44281.88275;Cluster-44281.10179;Cluster-44281.111739;Cluster-44281.111740;Cluster-44281.111741;Cluster-442…	K00234+K00234+K00235+K00411+K00413+K00415+K00415+K00416+K00417+K01507+K01507+K01507+K01507+K01507+K01507+K01535+K01535+K01535+K01535+K01535+K01535+K01535+K01535+K01535+K01535+K01535+K01535+K01535+K01535+K01535+K01535+K01535+K01535+K01535+K01535+K01535+K01535+K02115+K02126+K02127+K02127+K02128+K02128+K02128+K02128+K02128+K02128+K02128+K02129+K02130+K02130+K02132+K02132+K02132+K02132+K02132+K02133+…
									RNA transport	ko03013	293 out of 8252 3.55065438681532%	2944 out of 58977 4.99177645522831%	1	1	Cluster-33526.0;Cluster-44281.104574;Cluster-44281.130639;Cluster-44281.23586;Cluster-44281.27313;Cluster-44281.27314;Cluster-67010.5;Cluster-11135.0;Cluster-44281.57953;Cluster-44281.119851;Cluster-44281.19700;Cluster-4320.0;Cluster-44281.106547;Cluster-44281.33114;Cluster-44281.40372;Cluster-44281.66461;Cluster-44281.80683;Cluster-44281.84093;Cluster-44281.88421;Cluster-44281.104232;Cluster-442…	K00784+K00784+K00784+K00784+K00784+K00784+K00784+K00974+K00974+K02516+K02516+K03113+K03113+K03113+K03113+K03113+K03113+K03113+K03113+K03231+K03231+K03231+K03231+K03231+K03231+K03231+K03231+K03231+K03231+K03231+K03231+K03231+K03231+K03231+K03231+K03231+K03231+K03231+K03231+K03231+K03231+K03231+K03231+K03231+K03231+K03231+K03231+K03231+K03231+K03231+K03231+K03231+K03231+K03231+K03231+K03231+K03231+…		Ribosome	ko03010	402 out of 6519 6.16658996778647%	5328 out of 58977 9.03403021516863%	1	1	Cluster-63091.0;Cluster-44281.140785;Cluster-44281.145913;Cluster-44281.30295;Cluster-44281.54802;Cluster-44281.125221;Cluster-44281.125224;Cluster-44281.46693;Cluster-44281.46694;Cluster-44281.54459;Cluster-44281.54667;Cluster-44281.58307;Cluster-44281.81013;Cluster-44281.112083;Cluster-44281.125402;Cluster-44281.139885;Cluster-44281.6119;Cluster-41638.0;Cluster-44281.15720;Cluster-44281.58466;C…	K02863+K02865+K02865+K02865+K02865+K02866+K02866+K02866+K02866+K02866+K02866+K02866+K02866+K02868+K02868+K02868+K02868+K02870+K02870+K02870+K02870+K02870+K02872+K02872+K02872+K02873+K02873+K02873+K02873+K02874+K02875+K02875+K02875+K02875+K02875+K02875+K02876+K02877+K02877+K02877+K02877+K02877+K02877+K02879+K02880+K02880+K02880+K02880+K02880+K02881+K02881+K02881+K02881+K02881+K02882+K02882+K02882+…
									Ribosome	ko03010	586 out of 8252 7.10130877363063%	5328 out of 58977 9.03403021516863%	1	1	Cluster-44281.44694;Cluster-63091.0;Cluster-44281.140785;Cluster-44281.145913;Cluster-44281.15298;Cluster-44281.30292;Cluster-44281.30295;Cluster-44281.60240;Cluster-44281.68936;Cluster-44281.82153;Cluster-51563.1;Cluster-44281.11428;Cluster-44281.125221;Cluster-44281.125224;Cluster-44281.125225;Cluster-44281.125228;Cluster-44281.125230;Cluster-44281.125233;Cluster-44281.125234;Cluster-44281.4067…	K02863+K02863+K02865+K02865+K02865+K02865+K02865+K02865+K02865+K02865+K02865+K02866+K02866+K02866+K02866+K02866+K02866+K02866+K02866+K02866+K02866+K02866+K02866+K02866+K02866+K02866+K02866+K02866+K02868+K02868+K02868+K02868+K02868+K02870+K02870+K02870+K02870+K02870+K02870+K02870+K02870+K02871+K02871+K02872+K02872+K02872+K02872+K02872+K02872+K02873+K02873+K02873+K02873+K02873+K02873+K02873+K02873+…		RNA transport	ko03013	194 out of 6519 2.97591655161835%	2944 out of 58977 4.99177645522831%	1	1	Cluster-33527.0;Cluster-44281.10507;Cluster-44281.112607;Cluster-44281.113749;Cluster-44281.113750;Cluster-44281.17075;Cluster-44281.27313;Cluster-44281.27314;Cluster-44281.27317;Cluster-44281.95067;Cluster-67010.7;Cluster-44281.42405;Cluster-44281.56850;Cluster-44281.33114;Cluster-44281.66461;Cluster-44281.80673;Cluster-44281.80683;Cluster-13818.0;Cluster-44281.102705;Cluster-44281.104725;Cluste…	K00784+K00784+K00784+K00784+K00784+K00784+K00784+K00784+K00784+K00784+K00784+K00974+K02516+K03113+K03113+K03113+K03113+K03231+K03231+K03231+K03231+K03231+K03231+K03231+K03231+K03231+K03231+K03231+K03231+K03231+K03231+K03231+K03231+K03231+K03231+K03231+K03231+K03231+K03231+K03231+K03236+K03236+K03236+K03237+K03239+K03239+K03239+K03240+K03240+K03240+K03240+K03242+K03242+K03243+K03246+K03247+K03247+…
									mRNA surveillance pathway	ko03015	139 out of 8252 1.68444013572467%	1717 out of 58977 2.91130440680265%	1	1	Cluster-44281.53962;Cluster-44281.63084;Cluster-44281.74224;Cluster-9128.3;Cluster-11568.0;Cluster-44281.59279;Cluster-41237.0;Cluster-44281.67271;Cluster-44281.67272;Cluster-16601.0;Cluster-44281.60192;Cluster-41215.0;Cluster-44281.28920;Cluster-44281.69386;Cluster-44281.77533;Cluster-44281.77537;Cluster-44281.84431;Cluster-44281.36524;Cluster-44281.82347;Cluster-18421.0;Cluster-44281.14253;Clus…	K03265+K03265+K03265+K03265+K03267+K03267+K03456+K03456+K03456+K04354+K04354+K04382+K04382+K04382+K04382+K04382+K04382+K06100+K06100+K06269+K06269+K06269+K06269+K06269+K06269+K06269+K06965+K08873+K11583+K11584+K11584+K11584+K11584+K11584+K11584+K11584+K11584+K11584+K12812+K12812+K12812+K12812+K12812+K12812+K12812+K12812+K12812+K12812+K12812+K12875+K12875+K12875+K12875+K12875+K12876+K12877+K12881+…		RNA polymerase	ko03020	38 out of 6519 0.582911489492253%	1090 out of 58977 1.84817810332842%	1	1	Cluster-44281.108333;Cluster-44281.112946;Cluster-44281.114501;Cluster-44281.119438;Cluster-44281.121680;Cluster-44281.144282;Cluster-44281.31604;Cluster-44281.4473;Cluster-44281.50578;Cluster-44281.59530;Cluster-44281.60546;Cluster-44281.68050;Cluster-44281.73490;Cluster-44281.74313;Cluster-44281.74727;Cluster-44281.82479;Cluster-44281.83183;Cluster-44281.86001;Cluster-44281.87479;Cluster-5411.4…	K03006+K03006+K03006+K03006+K03006+K03006+K03006+K03006+K03006+K03006+K03006+K03006+K03006+K03006+K03006+K03006+K03006+K03006+K03006+K03006+K03011+K03013+K03013+K03016+K03016+K03018+K03018+K03020+K03020+K03021+K03021+K03021+K03021+K03022+K03022+K03022+K03027+K03046
									RNA polymerase	ko03020	66 out of 8252 0.799806107610276%	1090 out of 58977 1.84817810332842%	1	1	Cluster-64357.0;Cluster-32783.0;Cluster-44281.112506;Cluster-44281.27894;Cluster-32151.0;Cluster-44281.108333;Cluster-44281.112946;Cluster-44281.114501;Cluster-44281.115971;Cluster-44281.118881;Cluster-44281.119437;Cluster-44281.119438;Cluster-44281.121680;Cluster-44281.122176;Cluster-44281.129669;Cluster-44281.13544;Cluster-44281.144282;Cluster-44281.1693;Cluster-44281.18766;Cluster-44281.23121;…	K02999+K03002+K03004+K03004+K03006+K03006+K03006+K03006+K03006+K03006+K03006+K03006+K03006+K03006+K03006+K03006+K03006+K03006+K03006+K03006+K03006+K03006+K03006+K03006+K03006+K03006+K03006+K03006+K03006+K03006+K03006+K03006+K03006+K03006+K03006+K03006+K03006+K03006+K03006+K03006+K03008+K03009+K03011+K03012+K03013+K03013+K03013+K03014+K03016+K03016+K03016+K03018+K03020+K03020+K03020+K03021+K03021+…
