# Supplementary material for: Transcriptome and metabolome analyses of lignin biosynthesis mechanism of Platycladus orientalis
Source: PeerJ. 2022 Nov 2;10:e14172. doi: 10.7717/peerj.14172 (PMC9636869; doi:10.7717/peerj.14172)
Supplement: Table S8 [file peerj-10-14172-s013.xlsx]

## Sheet: Sheet1
Table S8 Correlation table of lignin biosynthesis-related differentially expressed genes and metabolites
Gene ID	Enzyme	Metabolites
Cluster-77994.4	POD	1-O-Galloyl-β-D-glucose, 3-Indoleacrylic acid, 4-Aminobenzoic acid, 6'-O-D-Glucosylloganic acid, Apigenin 4-O-rhamnoside*, Avicularin*, Caffeic acid, Epicatechin glucoside, Feruloyl glucose, Gallocatechin-catechin, Hesperetin 5-O-glucoside, Isorhamnetin-O-glucoside-O-rhamnoside, Kaempferide 3-O-β-D-glucuronide, Kaempferol-3-O-arabinosyl-7-O-rhamnoside, Kaempferol-3-O-galactoside (Trifolin)*, Kaem…
Cluster-44281.91549	POD	1-O-Galloyl-β-D-glucose, 3-Indoleacrylic acid, Apigenin 4-O-rhamnoside*, Avicularin*, Caffeic acid, Epicatechin glucoside, Feruloyl glucose, Gallocatechin-catechin, Hesperetin 5-O-glucoside, Isorhamnetin-O-glucoside-O-rhamnoside, Kaempferide 3-O-β-D-glucuronide, Kaempferol-3-O-arabinosyl-7-O-rhamnoside, Kaempferol-3-O-galactoside (Trifolin)*, Kaempferol-3-O-glucoside (Astragalin)*, Luteolin-O-rut…
Cluster-44281.56610	POD	Epiafzelechin, Epicatechin, Fustin, Imbricatolic acid, Syringaresinol
Cluster-44281.47921	POD	1-O-Galloyl-β-D-glucose, 3-Indoleacrylic acid, 4-Aminobenzoic acid, 6'-O-D-Glucosylloganic acid, Apigenin 4-O-rhamnoside*, Avicularin*, Caffeic acid, Epicatechin glucoside, Feruloyl glucose, Gallocatechin-catechin, Hesperetin 5-O-glucoside, Isorhamnetin-O-glucoside-O-rhamnoside, Kaempferide 3-O-β-D-glucuronide, Kaempferol-3-O-arabinosyl-7-O-rhamnoside, Kaempferol-3-O-galactoside (Trifolin)*, Kaem…
Cluster-44281.41359	POD	6'-O-D-Glucosylloganic acid, Apigenin 4-O-rhamnoside*, Avicularin*, Caffeic acid, Epicatechin glucoside, Feruloyl glucose, Gallocatechin-catechin, Hesperetin 5-O-glucoside, Isorhamnetin-O-glucoside-O-rhamnoside, Kaempferide 3-O-β-D-glucuronide, Kaempferol-3-O-arabinosyl-7-O-rhamnoside, Kaempferol-3-O-galactoside (Trifolin)*, Kaempferol-3-O-glucoside (Astragalin)*, Luteolin-7-O-rutinoside*, Luteol…
Cluster-44281.103406	POD	Epiafzelechin, Epicatechin, Fustin, Imbricatolic acid, Syringaresinol
Cluster-44281.80743	CCR	Epiafzelechin, Epicatechin, Fustin, Imbricatolic acid, Syringaresinol
Cluster-44281.71185	CCR	Epiafzelechin, Epicatechin, Fustin, Imbricatolic acid, Syringaresinol
Cluster-44281.67555	CCR	Epiafzelechin, Epicatechin, Fustin, Imbricatolic acid, Syringaresinol
Cluster-44281.63978	CCR	1-O-Galloyl-β-D-glucose, 3-Indoleacrylic acid, 4-Aminobenzoic acid, 6'-O-D-Glucosylloganic acid, Apigenin 4-O-rhamnoside*, Avicularin*, Caffeic acid, Epicatechin glucoside, Feruloyl glucose, Hesperetin 5-O-glucoside, Isorhamnetin-O-glucoside-O-rhamnoside, Kaempferide 3-O-β-D-glucuronide, Kaempferol-3-O-arabinosyl-7-O-rhamnoside, Kaempferol-3-O-galactoside (Trifolin)*, Kaempferol-3-O-glucoside (As…
Cluster-44281.62941	CCR	Epiafzelechin, Epicatechin, Fustin, Imbricatolic acid, Syringaresinol
Cluster-59398.0	CAD	Epiafzelechin, Epicatechin, Fustin, Imbricatolic acid, Syringaresinol
Cluster-44281.95346	CAD	Apigenin 4-O-rhamnoside*, Gallocatechin-catechin, Kaempferide 3-O--D-glucuronide, Kaempferol-3-O-arabinosyl-7-O-rhamnoside, Kaempferol-3-O-glucoside (Astragalin)*, Luteolin-O-rutinoside-O-rhamnoside
Cluster-44281.68469	CAD	Epiafzelechin, Epicatechin, Fustin, Imbricatolic acid, Syringaresinol
Cluster-44281.103971	CAD	1-O-Galloyl-β-D-glucose, 3-Indoleacrylic acid, Apigenin 4-O-rhamnoside*, Avicularin*, Caffeic acid, Epicatechin glucoside, Hesperetin 5-O-glucoside, Isorhamnetin-O-glucoside-O-rhamnoside, Kaempferide 3-O-β-D-glucuronide, Kaempferol-3-O-arabinosyl-7-O-rhamnoside, Kaempferol-3-O-galactoside (Trifolin)*, Kaempferol-3-O-glucoside (Astragalin)*, Luteolin-O-rutinoside-O-rhamnoside, Olivil-4’-O-β-D-gluc…
Cluster-44281.66535	4CL	1-O-Galloyl-β-D-glucose, 3-Indoleacrylic acid, Apigenin 4-O-rhamnoside*, Avicularin*, Caffeic acid, Epicatechin glucoside, Feruloyl glucose, Hesperetin 5-O-glucoside, Isorhamnetin-O-glucoside-O-rhamnoside, Kaempferide 3-O--D-glucuronide, Kaempferol-3-O-arabinosyl-7-O-rhamnoside, Kaempferol-3-O-galactoside (Trifolin)*, Kaempferol-3-O-glucoside (Astragalin)*, Luteolin-7-O-rutinoside*, Luteolin-O-ru…
Cluster-44281.38219	4CL	1-O-Galloyl-β-D-glucose, 3-Indoleacrylic acid, 4-Aminobenzoic acid, 6'-O-D-Glucosylloganic acid, Apigenin 4-O-rhamnoside*, Avicularin*, Caffeic acid, Epicatechin glucoside, Feruloyl glucose, Gallocatechin-catechin, Hesperetin 5-O-glucoside, Isorhamnetin-O-glucoside-O-rhamnoside, Kaempferide 3-O-β-D-glucuronide, Kaempferol-3-O-arabinosyl-7-O-rhamnoside, Kaempferol-3-O-galactoside (Trifolin)*, Kaem…
Cluster-44281.38217	4CL	1-O-Galloyl-β-D-glucose, 3-Indoleacrylic acid, 4-Aminobenzoic acid, 6'-O-D-Glucosylloganic acid, Apigenin 4-O-rhamnoside*, Avicularin*, Caffeic acid, Epicatechin glucoside, Feruloyl glucose, Gallocatechin-catechin, Hesperetin 5-O-glucoside, Isorhamnetin-O-glucoside-O-rhamnoside, Kaempferide 3-O-β-D-glucuronide, Kaempferol-3-O-arabinosyl-7-O-rhamnoside, Kaempferol-3-O-galactoside (Trifolin)*, Kaem…
Cluster-44281.111830	4CL	Epiafzelechin, Epicatechin, Fustin, Imbricatolic acid, Syringaresinol
Cluster-68156.0	COMT	Epiafzelechin, Epicatechin, Fustin, Imbricatolic acid, Syringaresinol
Cluster-44281.73529	CCoAOMT	Epiafzelechin, Epicatechin, Fustin, Imbricatolic acid, Syringaresinol
