# Supplementary material for: Transcriptome and metabolome analyses of lignin biosynthesis mechanism of Platycladus orientalis
Source: PeerJ. 2022 Nov 2;10:e14172. doi: 10.7717/peerj.14172 (PMC9636869; doi:10.7717/peerj.14172)
Supplement: Table S9 [file peerj-10-14172-s014.xlsx]

## Sheet: Sheet1
Table S9 The gene expression in different tissues measured by qRT-PCR
		Root	Steam	Leaf
Cluster-44281.111830 (4CL)	1	25.8125	25.6342	5.81589
	2	27.0958	24.4201	5.77572
	3	27.4741	22.4711	5.24157
	Mean	26.7942	24.1752	5.61106
	SD	0.870894	1.59573	0.320615
Cluster-68156.0 (COMT)	1	12.7286	12.6407	8.1681
	2	13.4543	11.3137	7.72749
	3	12.8171	9.98664	6.72717
	Mean	13	11.3137	7.54092
	SD	0.395942	1.32701	0.738358
Cluster-44281.111976 (CCR)	1	15.1369	12.6407	10.1261
	2	13.6422	11.3137	9.64646
	3	13.737	10.7034	8.9383
	Mean	14.172	11.5526	9.57027
	SD	0.836956	0.990468	0.597532
Cluster-44281.103971 (CAD)	1	15.455	9.06307	8.45614
	2	14.723	13.6422	8.05564
	3	14.1232	9.38268	6.9644
	Mean	14.7671	10.696	7.8254
	SD	0.66696	2.55647	0.772064
Cluster-44281.47921 (POD)	1	5.42642	2.69447	1.36604
	2	9.00047	4.62675	1.19748
	3	7.94474	2.31338	0.840896
	Mean	7.45721	3.21153	1.13481
	SD	1.83623	1.24034	0.268123
Cluster-44281.83773 (PAL)	1	26.9087	16.5642	11.1579
	2	31.125	17.6305	11.7127
	3	20.393	17.7531	12.4666
	Mean	26.1422	17.3159	11.7791
	SD	5.40689	0.653877	0.656864
